# Supplementary material for: Lithium zincate-enabled divergent one-pot dual C–C bond formation in thiophenes
Source: Royal Society of Chemistry journal article supplement (doi:10.1039/d5cc01079a), 2025-01-01
Supplement: d5cc01079a1.pdf [file d5cc01079a1.pdf]

## Supporting Information

for

### Lithium zincate-enabled divergent one-pot dual C–C bond formation in thiophenes

Alexandre Pierret,<sup>a</sup> Kevin Magra,<sup>a</sup> Hugo Lopez,<sup>a</sup> Thomas Kauffmann,<sup>a</sup>  
Clément Denhez,<sup>b</sup> Ibrahim Abdellah,<sup>c</sup> Christophe Werlé,<sup>\*a,d</sup> Alexandre  
Vasseur<sup>\*a</sup>

<sup>a</sup>Université de Lorraine, CNRS, L2CM, F-54000 Nancy, France

<sup>b</sup>Université de Reims Champagne Ardenne, CNRS, ICMR UMR 7312, 51097 Reims, France

<sup>c</sup>Université de Lorraine, CNRS, L2CM, F-57000 Metz, France

<sup>d</sup>Max Planck Institute for Chemical Energy Conversion, Stiftstr. 34–36, 45470 Mülheim an  
der Ruhr, Germany

Email: [christophe.werle@univ-lorraine.fr](mailto:christophe.werle@univ-lorraine.fr), [christophe.werle@cec.mpg.de](mailto:christophe.werle@cec.mpg.de),  
[alexandre.vasseur@univ-lorraine.fr](mailto:alexandre.vasseur@univ-lorraine.fr)

## Table of Contents

|                                                                                     |    |
|-------------------------------------------------------------------------------------|----|
| 1) General information.....                                                         | 3  |
| 2) Starting materials 1 .....                                                       | 4  |
| a) Synthesis and characterization data of <b>1a</b> .....                           | 4  |
| b) Synthesis and characterization data of <b>1b</b> .....                           | 5  |
| 3) Optimization of the reaction conditions for <i>Pathways</i> 1 and 2 .....        | 7  |
| a) Optimization table for the <i>Pathway 1</i> .....                                | 7  |
| b) Optimization table for the <i>Pathway 2</i> .....                                | 7  |
| c) Reactivity of <b>IIIa</b> with PhCOCl ( <b>3y</b> ) .....                        | 8  |
| 4) General procedure for the synthesis of products <b>4</b> and <b>6</b> .....      | 8  |
| a) General procedure for the synthesis of <b>4</b> .....                            | 8  |
| b) General procedure for the synthesis of <b>6</b> .....                            | 8  |
| 5) Characterisation data of products <b>4</b> and <b>6</b> .....                    | 10 |
| NMR spectra related to substrates <b>1</b> and products <b>4</b> and <b>6</b> ..... | 22 |

## 1) General information

All reactions were conducted under an argon atmosphere using dry, oxygen-free organic solvents and standard Schlenk techniques. Solvents and liquid reagents were transferred with single-use plastic graduated syringes and stainless-steel needles, except for electrophiles **3**, which were handled with Hamilton microsyringes. Tetrahydrofuran (THF, HPLC grade, non-stabilized, BioLab) and toluene were dried using an Mbraun 800 Solvent Purifier System (SPS) equipped with two alumina columns and stored under positive argon pressure (99.9999% purity). Stabilized 2-methyltetrahydrofuran (99+% purity), pre-dried over molecular sieves, was obtained from Fisher Scientific in AcroSeal packaging and used as received.

Reaction progress was monitored *via* analytical thin-layer chromatography (TLC) on silica gel pre-coated aluminum plates with an F254 indicator (Merck 60 F254). Spots were visualized under UV light and/or treated with phosphomolybdic acid followed by heating. For the synthesis of compounds **4** and **6**, crude mixtures were purified by column chromatography on silica gel (40–63  $\mu\text{m}$ ) using petroleum ether/diethyl ether mixtures as eluents (100/0 to 80/20, v/v). Exceptions include compounds **6ax**, which was purified by normal-phase HPLC on an Interchim US5SI column using a pentane/isopropanol mixture (20% isocratic, 20 mL/min flow rate, detected at  $\lambda = 254\text{ nm}$ ), and compounds **6ar** and **6eb**, purified on neutral alumina oxide gel (petroleum ether/Et<sub>2</sub>O, 90/10, v/v).

NMR spectra (<sup>1</sup>H, <sup>13</sup>C, <sup>19</sup>F, and <sup>31</sup>P) were recorded on a Bruker Advance III 400 spectrometer (400, 100, 375, and 161 MHz, respectively) using CDCl<sub>3</sub> as the solvent, with chemical shifts ( $\delta$ ) referenced to TMS. Chemical shifts are reported in ppm, calibrated to the residual peak of CDCl<sub>3</sub>:  $\delta = 7.26\text{ ppm}$  (s) for <sup>1</sup>H NMR and  $\delta = 77.16 \pm 0.06\text{ ppm}$  for <sup>13</sup>C NMR. Proton spectra are described as  $\delta$  (multiplicity, J coupling constant in Hz, number of protons). Multiplicities include: (bs) – broad singlet, (s) – singlet, (d) – doublet, (dd) – doublet of doublets, (ddd) – doublet of doublets of doublets, (dddd) – doublet of doublets of doublets of doublets, (dq) – doublet of quartets, (ddt) – doublet of doublets of triplets, (dt) – doublet of triplets, (h) – hexuplet, (m) – multiplet, (p) – pentuplet, (pd) – pentuplet of doublets, (q) – quartet, (qd) – quartet of doublets, (t) – triplet, (td) – triplet of doublets, and (tt) – triplet of triplets.

Infrared (IR) spectra were recorded on a Shimadzu IRAffinity-1 spectrometer equipped with a PIKE Technologies gladiATR accessory (spectral range: 7500–375 cm<sup>-1</sup>; resolution: < 3 cm<sup>-1</sup>). Wavenumbers are reported in cm<sup>-1</sup>.

Melting points (M.p.) were measured on a Kofler bench and are reported uncorrected in degrees Celsius.

High-resolution mass spectra (HRMS) were obtained using a Waters Xevo G2 ESI/QqTOF apparatus with a Waters Acquity UPLC H-Class PLUS system and an Atmospheric Pressure Ionization (API) source or a Bruker MicrOTOFq ESI/QqTOF apparatus equipped with an API source. Low-resolution mass spectra in electron impact mode (GC-EI) were recorded on a Shimadzu QP2010 instrument equipped with a DB5-MS UI column (30 m length, 0.25 mm internal diameter, 0.25  $\mu\text{m}$  film thickness).

Organolithium reagents were purchased from Aldrich or Fisher Scientific in AcroSeal packaging and routinely titrated under argon using a 1M solution of (-)-menthol in toluene with 1,10-phenanthroline as the indicator.

Anhydrous  $\text{ZnCl}_2$  (>98% reagent grade) was obtained from Aldrich. Before use, it was dried by heating under vacuum at approximately 140 °C with a heat gun, repeated three times.

Chemicals for the synthesis of starting materials **1** and electrophiles **3** were sourced from commercial suppliers and used as received.

## 2) Starting materials 1

### a) Synthesis and characterization data of **1a**

**Compound 1a** was synthesized *via* a two-step procedure starting from 2-thiophenemethanol.

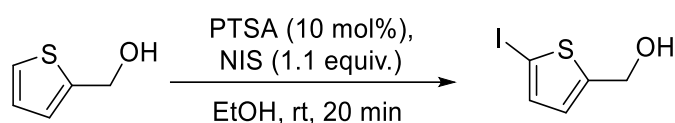

In the first step, 2-thiophenemethanol (2.283 g, 20 mmol, 1 equiv) was dissolved in ethanol (EtOH, 40 mL) at room temperature (rt). *N*-Iodosuccinimide (4.950 g, 22 mmol, 1.1 equiv) was then added, followed by *p*-toluenesulfonic acid (40 mg, 0.2 mmol, 0.1 equiv). The reaction mixture was stirred for 20 minutes at rt before being quenched with a saturated aqueous solution of sodium thiosulfate ( $\text{Na}_2\text{S}_2\text{O}_3$ , 20 mL). The resulting mixture was diluted with ethyl acetate (EtOAc, 30 mL), and the organic and aqueous layers were separated. The aqueous phase was extracted twice with EtOAc (2 × 30 mL). The combined organic extracts were washed with a 1 M aqueous solution of sodium carbonate ( $\text{Na}_2\text{CO}_3$ ), dried over magnesium sulfate ( $\text{MgSO}_4$ ), filtered through cotton, and concentrated under reduced pressure. The crude product was purified by silica gel chromatography ( $\text{SiO}_2$ ) using a petroleum ether/diethyl ether (80/20, v/v) mixture as the eluent. This afforded 5-iodothiophenyl alcohol as a pure compound in 94% yield.

**(5-iodothiophen-2-yl)methanol.**<sup>1</sup> Pale yellow oil (4.486 g, yield 94%).  $R_f$  0.31 (Petroleum ether/ $\text{Et}_2\text{O}$ , 8/2, v/v). <sup>1</sup>H RMN (400 MHz,  $\text{CDCl}_3$ )  $\delta$  7.11 (d,  $J$  = 3,6 Hz, 1H), 6.69 (d,  $J$  = 3,6 Hz, 1H), 4.80 (s, 2H), 1.76 (bs, 1H). <sup>13</sup>C RMN (100 MHz,  $\text{CDCl}_3$ )  $\delta$  150.3, 136.8, 127.1, 73.5, 60.1.

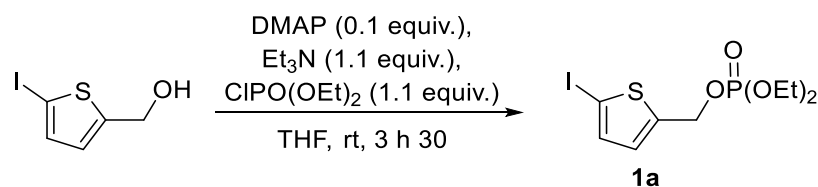

In the second step, an oven-dried 100 mL two-neck flask equipped with a Teflon-coated magnetic stir bar, a greased gas inlet adapter with a glass plug, and a rubber septum was charged with DMAP (120 mg, 0.98 mmol, 0.1 equiv) and 5-iodothiophenyl alcohol (2.342 g, 9.75 mmol, 1 equiv). The flask was connected to a Schlenk line, and the air inside was evacuated. The resulting vacuum was replaced with argon. This “vac-refill” procedure was repeated three times to ensure an inert atmosphere.

<sup>1</sup> Grolleau, J.; Frère, P.; Gohier, F. Clean and Efficient Iodination of Thiophene Derivatives. *Synthesis* **2015**, 47, 3901–3906.

Dry tetrahydrofuran (THF, 60 mL) was added, and the mixture was stirred at room temperature (rt) for 5 minutes. Triethylamine (Et<sub>3</sub>N, 1.5 mL, 10.73 mmol, 1.1 equiv) was added dropwise *via* syringe, followed by slow addition of diethyl chlorophosphate (1.55 mL, 10.73 mmol, 1.1 equiv) *via* syringe. A white precipitate formed during the addition. The reaction mixture was stirred at rt for 3 hours and 30 minutes before being quenched with a saturated aqueous solution of ammonium chloride (NH<sub>4</sub>Cl, 30 mL). The layers were separated, and the aqueous phase was extracted three times with diethyl ether (Et<sub>2</sub>O). The combined organic fractions were washed with brine, dried over magnesium sulfate (MgSO<sub>4</sub>), filtered through cotton, and concentrated under reduced pressure. The crude product was purified by silica gel chromatography (SiO<sub>2</sub>, 60–200 μm) using petroleum ether/ethyl acetate (50/50, v/v) as the eluent, affording **compound 1a** as a pure product in 78% yield.

**Diethyl ((5-iodothiophen-2-yl)methyl)phosphate (1a).** Pale yellow oil (2.866 g, 78%). R<sub>f</sub> 0.48 (Petroleum Ether/EtOAc, 50/50, v/v). <sup>1</sup>H NMR (400 MHz, CDCl<sub>3</sub>) δ 7.12 (d, *J* = 3.7 Hz, 1H), 6.78 (d, *J* = 3.7 Hz, 1H), 5.15 (d, *J* = 8.9 Hz, 2H), 4.14–3.99 (m, 4H), 1.30 (t, *J* = 7.1 Hz, 6H). <sup>13</sup>C NMR (100 MHz, CDCl<sub>3</sub>) δ = 144.5, 136.8, 129.6, 75.3, 64.1, 63.0, 16.2. <sup>31</sup>P {<sup>1</sup>H} NMR (161 MHz, CDCl<sub>3</sub>) δ -1.30 (s, 1P). IR (ATR) ν<sub>max</sub>/cm<sup>-1</sup> 2980, 2904, 1425, 1255, 1165, 962, 794, 499, 459. HRMS (ESI-TOF) *m/z* calcd for C<sub>9</sub>H<sub>14</sub>INaO<sub>4</sub>PS [M+Na]<sup>+</sup> 398.9287, found 398.9294.

## b) Synthesis and characterization data of **1b**

**Compound 1b** was synthesized in two steps starting from 5-bromo-2-thiophenecarbaldehyde.

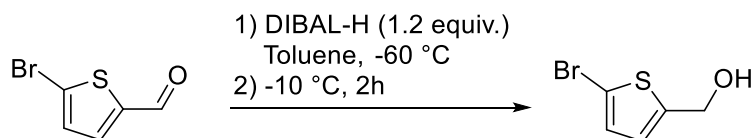

**Step 1:** An oven-dried 250 mL three-neck flask, equipped with a Teflon-coated magnetic stir bar, a greased gas inlet adapter with a glass plug, a low-temperature thermometer with a greased glass adapter, and a dropping funnel with a rubber septum, was charged with 5-bromo-2-thiophenecarbaldehyde (2.38 mL, 20 mmol, 1 equiv). The flask was connected to a Schlenk line, and the air was evacuated. The resulting vacuum was replaced with argon, and this “vac-refill” operation was repeated three times. Anhydrous toluene was added *via* the dropping funnel, and the solution was stirred at 60 °C. A 1 M toluene solution of DIBAL-H (24 mL, 24 mmol, 1.2 equiv) was prepared and diluted with anhydrous toluene (15 mL). This solution was added dropwise to the reaction flask at -60 °C. Once the addition was complete, the mixture was stirred at -10 °C for 2 hours, then quenched by the slow addition of 1 M HCl (20 mL) followed by water (20 mL). The layers were separated, and the aqueous phase was extracted three times with diethyl ether (Et<sub>2</sub>O, 3 × 30 mL). The combined organic layers were washed with brine, dried over magnesium sulfate (MgSO<sub>4</sub>), filtered through cotton, and concentrated under reduced pressure. The crude product was purified by silica gel chromatography (SiO<sub>2</sub>) using a petroleum ether/diethyl ether mixture (80/20, v/v), yielding **(5-bromothiophen-2-yl)methanol** as a pure compound in 99% yield.

**(5-bromothiophen-2-yl)methanol.**<sup>2</sup> Brown oil (4.013 mg, 99%).  $R_f$  0.29 (Petroleum Ether/Et<sub>2</sub>O, 80/20, v/v). <sup>1</sup>H NMR (400 MHz, CDCl<sub>3</sub>)  $\delta$  6.92 (d,  $J$  = 3.7 Hz, 1H), 6.76 (d,  $J$  = 3.7 Hz, 1H), 4.74 (s, 2H), 1.81 (bs, 1H). <sup>13</sup>C NMR (100 MHz, CDCl<sub>3</sub>)  $\delta$  145.8, 129.7, 125.8, 112.3, 60.1.

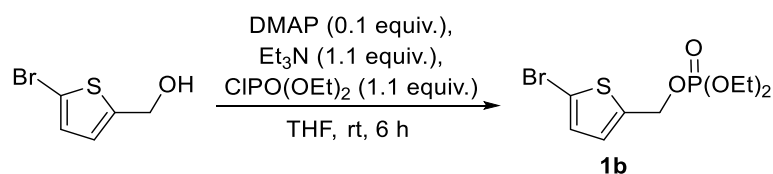

**Step 2:** An oven-dried 100 mL two-neck flask, equipped with a Teflon-coated magnetic stir bar, a greased gas inlet adapter with a glass plug, and a rubber septum, was charged with DMAP (122 mg, 1.0 mmol, 0.1 equiv) and (5-bromothiophen-2-yl)methanol (1.930 g, 10 mmol, 1 equiv). The flask was connected to a Schlenk line, and the air was evacuated. The vacuum was replaced with argon, and the “vac-refill” operation was repeated three times. Dry tetrahydrofuran (THF, 60 mL) was added, and the mixture was stirred at room temperature (rt) for 5 minutes. Triethylamine (Et<sub>3</sub>N, 1.49 mL, 11 mmol, 1.1 equiv) was added dropwise *via* syringe, followed by diethyl chlorophosphate (1.59 mL, 11 mmol, 1.1 equiv) added slowly *via* syringe. A white precipitate formed during the addition. The reaction mixture was stirred at rt for 6 hours before being quenched with a saturated aqueous solution of ammonium chloride (NH<sub>4</sub>Cl, 30 mL). The layers were separated, and the aqueous phase was extracted three times with Et<sub>2</sub>O (3 × 30 mL). The combined organic layers were washed with brine (80 mL), dried over MgSO<sub>4</sub>, filtered through cotton, and concentrated under reduced pressure. The crude product was purified by silica gel chromatography (SiO<sub>2</sub>, 60–200  $\mu$ m) using petroleum ether/ethyl acetate (50/50, v/v), yielding **Compound 1b** in 76% yield.

**Diethyl ((5-bromothiophen-2-yl)methyl)phosphate (1b).** Colorless oil (2.497 g, 76%).  $R_f$  0.47 (Petroleum Ether/EtOAc, 50/50, v/v). <sup>1</sup>H NMR (400 MHz, CDCl<sub>3</sub>)  $\delta$  6.95 (d,  $J$  = 3.7 Hz, 1H), 6.86 (d,  $J$  = 3.7 Hz, 1H), 5.11 (d,  $J$  = 9.0 Hz, 2H), 4.14–4.05 (m, 4H), 1.31 (t,  $J$  = 7.1, 6H). <sup>13</sup>C NMR (100 MHz, CDCl<sub>3</sub>)  $\delta$  140.1, 129.7, 128.4, 114.0, 64.1, 63.4, 16.1. <sup>31</sup>P {<sup>1</sup>H} NMR (161 MHz, CDCl<sub>3</sub>)  $\delta$  -1.29 (s, 1P). IR (ATR)  $\nu_{max}/cm^{-1}$  2980, 2906, 1438, 1259, 1165, 974, 794, 501, 460. HRMS (ESI-TOF)  $m/z$  calcd for C<sub>9</sub>H<sub>14</sub>BrNaO<sub>4</sub>PS [M+Na]<sup>+</sup> 350.9426, found 350.9428.

<sup>2</sup> (a) Lee, J.; Ryu, T.; Park S.; Lee, P. H. Indium Tri(isopropoxide)-Catalyzed Selective Meerwein–Ponndorf–Verley Reduction of Aliphatic and Aromatic Aldehydes. *J. Org. Chem.* **2012**, 77, 4821–4825. (b) Wei, C.; Zou, J.; Zhang, W.; Huang, J.; Gao, D.; Wang, L.; Liao, Y.; Yu, G. Novel vinylene-bridged donor–acceptor copolymers: synthesis, characterization, properties and effect of cyano substitution. *Mater. Chem. Front.* **2017**, 1, 2103–2110. (c) Basu, B.; Mandal, B.; Das, S.; Das, P.; Nanda, A. K. Chemoselective reduction of aldehydes by ruthenium trichloride and resin-bound formates. *Beilstein J. Org. Chem.* **2008**, 4, 53.

### 3) Optimization of the reaction conditions for *Pathways 1 and 2*

#### a) Optimization table for the *pathway 1*

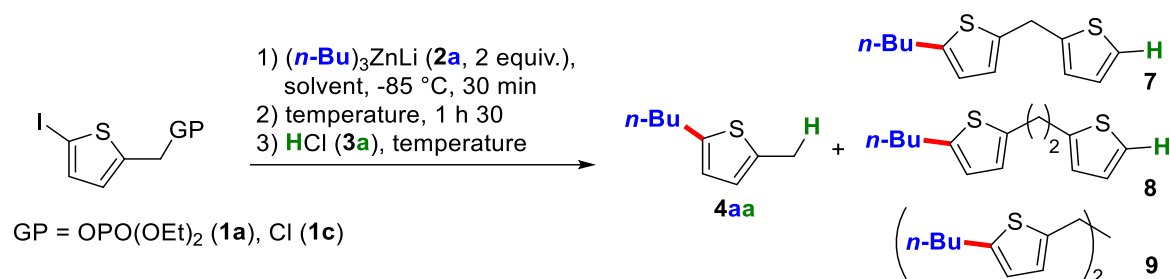

| Entry | Solvent | Temperature | <b>1</b>  | <b>4aa<sup>b</sup></b> | <b>7, 8, 9</b> |
|-------|---------|-------------|-----------|------------------------|----------------|
| 1     | THF     | - 40 °C     | <b>1a</b> | 20                     | 80             |
| 2     | THF     | - 40 °C     | <b>1c</b> | Traces                 | ~100           |
| 3     | 2-MeTHF | - 40 °C     | <b>1c</b> | 67                     | 33             |
| 4     | 2-MeTHF | - 40 °C     | <b>1a</b> | 83                     | 17             |
| 5     | 2-MeTHF | - 85 °C     | <b>1c</b> | 80                     | 20             |
| 6     | 2-MeTHF | - 85 °C     | <b>1a</b> | 90                     | 10             |

<sup>a</sup>Conditions : 1) (0.6 mmol), Bu<sub>3</sub>ZnLi (1.2 mmol), -85 °C, 30 min, solvent (10 mL); 2) temperature, 1h30; 3) HCl. <sup>b</sup>ratio calculated by GC/MS, values expressed in %.

#### b) Optimization table for the *Pathway 2*

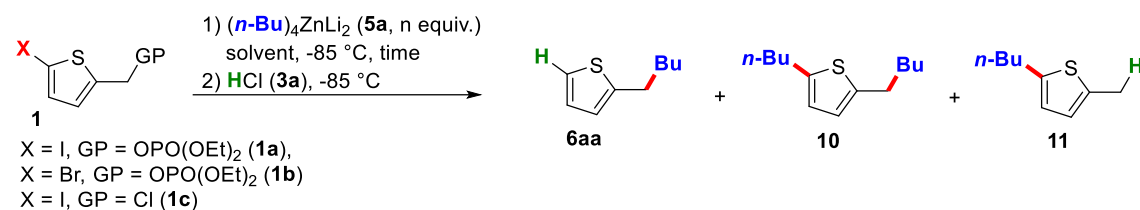

| Entry           | <b>1</b>  | Solvent           | Equiv. | Time              | <b>6aa<sup>b</sup></b> | <b>10<sup>b</sup></b> | <b>11<sup>b</sup></b> |
|-----------------|-----------|-------------------|--------|-------------------|------------------------|-----------------------|-----------------------|
| 1               | <b>1a</b> | 2-MeTHF           | 2      | 2 h               | 39                     | 61                    | -                     |
| 2               | <b>1a</b> | THF               | 2      | 2 h               | 65                     | 35                    | -                     |
| 3               | <b>1a</b> | THF               | 2      | 5, 10, 30, 60 min | 66                     | 34                    | -                     |
| 4               | <b>1c</b> | THF               | 2      | 30 min            | 60                     | 40                    | -                     |
| 5               | <b>1a</b> | Et <sub>2</sub> O | 2      | 10 min            | 60                     | 30 <sup>c</sup>       | 8                     |
| 6               | <b>1a</b> | Toluene           | 2      | 10 min            | 53 <sup>c</sup>        | 6 <sup>c</sup>        | 6                     |
| 7               | <b>1a</b> | 2-MeTHF           | 1,1    | 2 h               | 37                     | 21                    | 42                    |
| 8               | <b>1a</b> | THF               | 1,1    | 2 h               | 40                     | 15                    | 45                    |
| 9               | <b>1a</b> | THF               | 1,5    | 2 h               | 43                     | 19                    | 38                    |
| 10              | <b>1a</b> | THF               | 3      | 2 h               | 65                     | 35                    | -                     |
| 11 <sup>d</sup> | <b>1b</b> | THF               | 2      | 1 h               | 83                     | 17                    | -                     |
| 12 <sup>e</sup> | <b>1b</b> | THF               | 2,2    | 30 min            | 100                    | -                     | -                     |

<sup>a</sup>Conditions: 1) **1** (0.6 mmol), Bu<sub>4</sub>ZnLi<sub>2</sub>, -85 °C, time, solvent (10 mL); 2) HCl (2 mL), -85 °C. <sup>b</sup>ratio calculated by GC/MS, values expressed in %. <sup>c</sup>along with other side products. <sup>d</sup>reaction at -60 °C. <sup>e</sup>additional stirring at -60 °C for 1 h.

### c) Reactivity of **IIIa** with PhCOCl (**3y**)

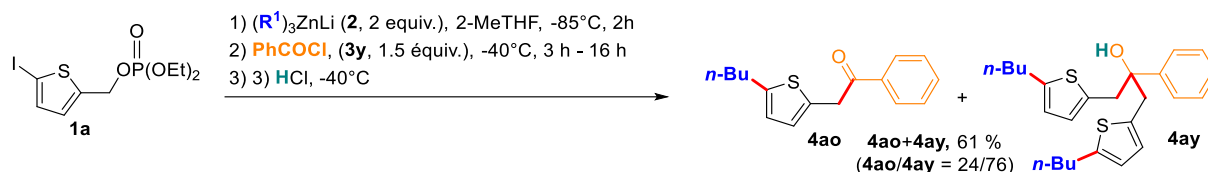

## 4) General procedure for the synthesis of products **4** and **6**

### a) General procedure for the synthesis of **4**

An oven-dried 50 mL three-neck flask, equipped with a Teflon-coated magnetic stir bar, a greased gas inlet adapter with a glass plug, a rubber septum, and a low-temperature thermometer with a greased glass adapter, was charged with anhydrous ZnCl<sub>2</sub> (164 mg, 1.2 mmol, 2.0 equiv). The flask was connected to a Schlenk line, and the air was evacuated. ZnCl<sub>2</sub> was dried by heating three times under vacuum at ~140 °C using a heat gun. Once cooled to room temperature, the vacuum was replaced with argon, and the “vac-refill” operation was repeated three times. Dry 2-MeTHF (8 mL) was added, and the mixture was stirred at -10 °C for 10 minutes. A solution of the organolithium reagent (3.6 mmol, 6 equiv) was added dropwise under inert conditions while maintaining the temperature below -5 °C. After stirring for 20 minutes at -10 °C, the mixture was cooled to -85 °C. A dry 2-MeTHF solution of diethyl ((5-iodothiophen-2-yl)methyl)phosphate (**1a**) (225.7 mg in 2 mL of 2-MeTHF, 0.6 mmol, 1.0 equiv) was added dropwise, and the reaction was stirred at -85 °C for 2 hours. The mixture was warmed to -40 °C, and the electrophile **3** (0.9 mmol, 1.5 equiv) was added dropwise. The solution was stirred at either -40 °C or -20 °C (depending on the electrophile) for 3–16 hours. The reaction was quenched with 1 M HCl (8 mL) at -40 °C. The layers were separated, and the aqueous phase was extracted with ethyl acetate (EtOAc, 3 × 15 mL). The combined organic layers were washed with brine (30 mL), dried over MgSO<sub>4</sub>, filtered through cotton, and concentrated under reduced pressure. Pure products **4** were obtained after silica gel chromatography (SiO<sub>2</sub>, 40–63 μm) using petroleum ether/diethyl ether (100/0–90/10, v/v).

**Modifications for *t*-BuLi Reactions:** For reactions involving *t*-BuLi, the addition to ZnCl<sub>2</sub> was carried out at -85 °C instead of -10 °C. After 10 minutes of stirring at -85 °C, the reaction mixture was stirred at -20 °C for an additional 20 minutes.

### b) General procedure for the synthesis of **6**

An oven-dried 50 mL three-neck flask, equipped with a Teflon-coated magnetic stir bar, a greased gas inlet adapter with a glass plug, a rubber septum, and a low-temperature thermometer with a greased glass adapter, was charged with anhydrous ZnCl<sub>2</sub> (180 mg, 1.32 mmol, 2.2 equiv). The flask was connected to a Schlenk line, and the air was evacuated. ZnCl<sub>2</sub> was dried by heating three times under vacuum at ~140 °C using a heat gun. Once cooled to room temperature, the vacuum was replaced with argon, and the “vac-refill” operation was repeated three times. Dry THF (8 mL) was added, and the



mixture was stirred at -10 °C for 10 minutes. A solution of the organolithium reagent (5.28 mmol, 8.8 equiv) was added dropwise under inert conditions while maintaining the temperature below -5 °C. After stirring for 20 minutes at -10 °C, the mixture was cooled to -85 °C. A dry THF solution of diethyl ((5-bromothiophen-2-yl)methyl)phosphate (**1b**) (197.5 mg in 2 mL of THF, 0.6 mmol, 1.0 equiv) was added dropwise. The reaction was stirred at -85 °C for 30 minutes, then at -60 °C for 1 hour. The mixture was further cooled to -85 °C, and electrophile **3** (1.8 mmol, 3 equiv) was added dropwise. The solution was stirred at -85 °C for 5 minutes, then at -60 °C for 16 hours. The reaction was quenched with 1 M HCl (8 mL) at -60 °C. The layers were separated, and the aqueous phase was extracted with EtOAc (3 × 15 mL). The combined organic layers were washed with brine (30 mL), dried over MgSO<sub>4</sub>, filtered through cotton, and concentrated under reduced pressure. Pure products **6** were obtained after silica gel chromatography (SiO<sub>2</sub>, 40–63 μm) using petroleum ether/diethyl ether (98/2–80/20, v/v). Exceptions: **6ax** was purified by normal-phase HPLC on an Interchim US5SI column (pentane/isopropanol, 20%, 20 mL/min, λ = 254 nm), while **6ar** and **6eb** were purified on neutral alumina oxide gel (Al<sub>2</sub>O<sub>3</sub>, petroleum ether/diethyl ether, 90/10, v/v).

**Modifications for *t*-BuLi Reactions:** For reactions involving *t*-BuLi, the addition to ZnCl<sub>2</sub> was performed at -85 °C. After 10 minutes of stirring at that temperature, the reaction mixture was stirred at -20 °C for an additional 20 minutes.

## 5) Characterisation data of products 4 and 6

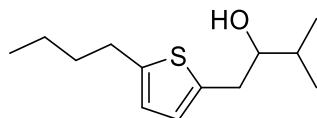

**1-(5-butylthiophen-2-yl)-3-methylbutan-2-ol (4ab).** Colorless oil (98 mg, 73%).  $R_f$  0.3 (Petroleum ether/Et<sub>2</sub>O, 90/10, v/v).  $^1\text{H NMR}$  (400 MHz, CDCl<sub>3</sub>)  $\delta$  6.66 (d,  $J$  = 3.3 Hz, 1H), 6.60 (d,  $J$  = 3.3 Hz, 1H), 3.54 (ddt,  $J$  = 9.1, 5.5, 3.5 Hz, 1H), 2.97 (dd,  $J$  = 14.7, 3.5 Hz), 2.82–2.73 (m, 3H), 1.75 (pd,  $J$  = 6.8, 5.5 Hz, 1H), 1.68–1.60 (m, 3H), 1.38 (dt,  $J$  = 14.7, 7.4 Hz), 0.99 (d,  $J$  = 6.8 Hz, 6H), 0.93 (t,  $J$  = 7.4 Hz, 3H).  $^{13}\text{C NMR}$  (100 MHz, CDCl<sub>3</sub>)  $\delta$  144.9, 138.6, 125.6, 123.8, 77.3, 35.4, 33.9, 33.0, 30.0, 22.4, 19.0, 17.7, 14.0. IR (ATR)  $\nu_{\text{max}}/\text{cm}^{-1}$ : 3381, 2954, 2927, 2870, 1633, 1464, 1039, 993, 790. HRMS (ESI-TOF)  $m/z$  calcd for C<sub>13</sub>H<sub>22</sub>NaOS [M+Na]<sup>+</sup> 249.1284, found 249.1274.

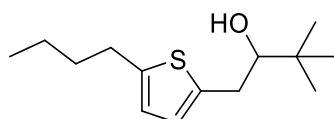

**1-(5-butylthiophen-2-yl)-3,3-dimethylbutan-2-ol (4ac).** Colorless oil (93 mg, 65%);  $R_f$  0.77 (Petroleum ether/Et<sub>2</sub>O, 90/10, v/v).  $^1\text{H NMR}$  (400 MHz, CDCl<sub>3</sub>)  $\delta$  6.66 (d,  $J$  = 3.3 Hz, 1H), 6.60 (d,  $J$  = 3.3 Hz, 1H), 3.41 (dd,  $J$  = 10.7, 2.0 Hz, 1H, H<sub>6</sub>), 3.01 (d,  $J$  = 14.7 Hz, 1H), 2.76 (t,  $J$  = 7.6 Hz, 2H), 2.67 (dd,  $J$  = 14.7, 10.7 Hz, 1H), 1.67–1.60 (m, 3H), 1.43–1.34 (m, 2H), 0.98 (s, 9H), 0.93 (t,  $J$  = 7.3 Hz).  $^{13}\text{C NMR}$  (100 MHz, CDCl<sub>3</sub>)  $\delta$  144.9, 139.7, 125.5, 123.8, 80.4, 34.9, 33.9, 33.2, 30.0, 26.0, 22.3, 14.0. IR (ATR)  $\nu_{\text{max}}/\text{cm}^{-1}$ : 3481, 2953, 2927, 2868, 1477, 1458, 1361, 1066, 1006, 798, 777. HRMS (ESI-TOF)  $m/z$  calcd for C<sub>14</sub>H<sub>24</sub>NaOS [M+Na]<sup>+</sup> 263.1440, found 263.1415.

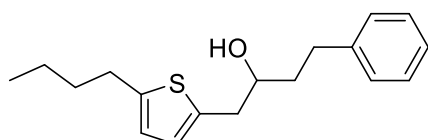

**1-(5-butylthiophen-2-yl)-4-phenylbutan-2-ol (4ad).** Colorless oil (98 mg, 60%);  $R_f$  0.25 (Petroleum ether/Et<sub>2</sub>O, 90/10, v/v).  $^1\text{H NMR}$  (400 MHz, CDCl<sub>3</sub>)  $\delta$  7.31–7.26 (m, 2H), 7.23–7.16 (m, 3H), 6.64 (d,  $J$  = 3.3 Hz, 1H), 6.60 (d,  $J$  = 3.3 Hz, 1H), 3.80 (tt,  $J$  = 8.2, 4.3 Hz, 1H), 2.98 (dd,  $J$  = 14.7, 3.9 Hz), 2.87–2.68 (m, 5H), 1.84 (dddd,  $J$  = 9.4, 7.5, 5.4, 3.8 Hz, 2H), 1.67–1.62 (m, 3H), 1.38 (dt,  $J$  = 14.6, 7.4 Hz, 2H), 0.93 (t,  $J$  = 7.3 Hz, 3H).  $^{13}\text{C NMR}$  (100 MHz, CDCl<sub>3</sub>)  $\delta$  145.1, 142.1, 137.7, 128.6, 128.5, 126.0, 125.8, 123.9, 71.7, 38.5, 38.2, 33.9, 32.2, 30.0, 22.3, 14.0. IR (ATR)  $\nu_{\text{max}}/\text{cm}^{-1}$ : 3354, 2926, 2854, 1494, 1454, 1049, 796, 744, 696. HRMS (ESI-TOF)  $m/z$  calcd for C<sub>18</sub>H<sub>23</sub>S [M-H<sub>2</sub>O+H]<sup>+</sup> 271.1515, found 271.1515.

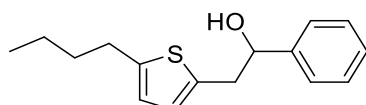

**2-(5-butylthiophen-2-yl)-1-phenylethan-1-ol (4ae).** Colorless oil (107 mg, 69%);  $R_f$  0.36 (Petroleum ether/Et<sub>2</sub>O, 90/10, v/v).  $^1\text{H NMR}$  (400 MHz, CDCl<sub>3</sub>)  $\delta$  7.41–7.33 (m, 4H), 7.31–7.28 (m, 1H), 6.64 (dt,  $J$  = 3.4, 1.0 Hz, 1H), 6.60 (dt,  $J$  = 3.4, 1.0 Hz, 1H), 4.87 (dd,  $J$  = 8.4, 4.6 Hz, 1H), 3.20–3.09 (m, 2H), 2.76 (t,  $J$

= 7.6 Hz, 2H), 1.67–1.60 (m, 3H), 1.42–1.36 (m, 2H), 0.93 (t,  $J$  = 7.4 Hz, 3H).  $^{13}\text{C}$  NMR (100 MHz,  $\text{CDCl}_3$ )  $\delta$  145.2, 143.5, 137.5, 128.6, 127.8, 126.0, 126.0, 123.8, 75.1, 40.6, 33.9, 30.0, 22.3, 13.9. IR (ATR)  $\nu_{\text{max}}/\text{cm}^{-1}$ : 3365, 2954, 2926, 2854, 1452, 1043, 1026, 794, 756, 698. HRMS (ESI-TOF)  $m/z$  calcd for  $\text{C}_{16}\text{H}_{19}\text{S}$   $[\text{M}-\text{H}_2\text{O}+\text{H}]^+$  243.1207, found 243.1213.

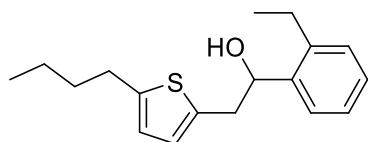

**2-(5-butylthiophen-2-yl)-1-(2-ethylphenyl)ethan-1-ol (4af).** Colorless oil (70 mg, 41%);  $R_f$  0.33 (Petroleum ether/ $\text{Et}_2\text{O}$ , 90/10, v/v).  $^1\text{H}$  NMR (400 MHz,  $\text{CDCl}_3$ )  $\delta$  7.59–7.53 (m, 1H), 7.26–7.17 (m, 3H), 6.68 (d,  $J$  = 3.3 Hz, 1H), 6.61 (d,  $J$  = 3.3 Hz, 1H), 5.13 (dd,  $J$  = 7.4, 5.3 Hz, 1H), 3.15–3.07 (m, 2H), 2.80–2.74 (m, 2H), 2.73–2.63 (m, 2H), 2.08 (bs, 1H), 1.65 (p,  $J$  = 7.5 Hz, 2H), 1.44–1.36 (m, 2H), 1.24 (t,  $J$  = 7.6 Hz, 3H), 0.94 (t,  $J$  = 7.3 Hz, 3H).  $^{13}\text{C}$  NMR (100 MHz,  $\text{CDCl}_3$ )  $\delta$  145.2, 141.0, 140.8, 138.1, 128.7, 127.8, 126.5, 125.8, 125.6, 123.9, 71.2, 40.2, 33.9, 30.0, 25.4, 22.3, 15.8, 13.9. IR (ATR)  $\nu_{\text{max}}/\text{cm}^{-1}$ : 3360, 2956, 2926, 2856, 1456, 1028, 794, 752. HRMS (ESI-TOF)  $m/z$  calcd for  $\text{C}_{18}\text{H}_{23}\text{S}$   $[\text{M}-\text{H}_2\text{O}+\text{H}]^+$  271.1515, found 271.1530.

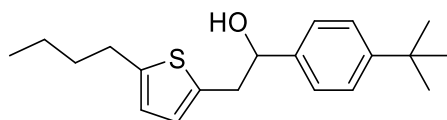

**1-(4-(tert-butyl)phenyl)-2-(5-butylthiophen-2-yl)ethan-1-ol (4ag).** Colorless oil (134 mg, 71%);  $R_f$  0.33 (Petroleum ether/ $\text{Et}_2\text{O}$ , 90/10, v/v).  $^1\text{H}$  NMR (400 MHz,  $\text{CDCl}_3$ )  $\delta$  7.42–7.38 (m, 2H), 7.36–7.32 (m, 2H), 6.69 (d,  $J$  = 3.4 Hz, 1H), 6.62 (t,  $J$  = 4.1 Hz, 1H), 4.85 (dd,  $J$  = 8.3, 4.6 Hz, 1H), 3.21–3.09 (m, 2H), 2.78 (q,  $J$  = 6.6, 5.8 Hz, 2H), 2.17 (bs, 1H), 1.69–1.62 (m, 2H), 1.46–1.37 (m, 2H), 1.34 (d,  $J$  = 6.7 Hz, 9H), 0.96 (t,  $J$  = 7.3 Hz, 3H).  $^{13}\text{C}$  NMR (100 MHz,  $\text{CDCl}_3$ )  $\delta$  150.8, 145.1, 140.5, 137.9, 125.9, 125.7, 125.5, 123.8, 74.9, 40.4, 34.6, 33.9, 31.5, 29.9, 22.3, 13.9. IR (ATR)  $\nu_{\text{max}}/\text{cm}^{-1}$ : 3354, 2954, 2927, 2868, 1508, 1458, 1361, 1267, 1107, 1045, 1016, 831, 794, 574. HRMS (ESI-TOF)  $m/z$  calcd for  $\text{C}_{20}\text{H}_{27}\text{S}$   $[\text{M}-\text{H}_2\text{O}+\text{H}]^+$  299.1828, found 299.1848.

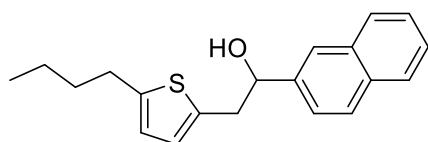

**2-(5-butylthiophen-2-yl)-1-(naphthalen-2-yl)ethan-1-ol (4ah).** Yellow oil (116 mg, 63%);  $R_f$  0.27 (Petroleum ether/ $\text{Et}_2\text{O}$ , 90/10, v/v).  $^1\text{H}$  NMR (400 MHz,  $\text{CDCl}_3$ )  $\delta$  7.86–7.80 (m, 4H), 7.54–7.45 (m, 3H), 6.67 (d,  $J$  = 3.4 Hz, 1H), 6.60 (d,  $J$  = 3.4 Hz, 1H), 5.05 (dd,  $J$  = 8.5, 4.5 Hz, 1H), 3.27 (dd,  $J$  = 14.8, 4.4 Hz, 1H), 3.20 (dd,  $J$  = 14.8, 8.5 Hz, 1H), 2.76 (t,  $J$  = 7.6 Hz, 2H), 1.68–1.59 (m, 3H), 1.42–1.35 (m, 2H), 0.93 (t,  $J$  = 7.4 Hz, 3H).  $^{13}\text{C}$  NMR (100 MHz,  $\text{CDCl}_3$ )  $\delta$  145.3, 140.9, 137.4, 133.4, 133.2, 128.4, 128.1, 127.8, 126.3, 126.1, 126.0, 124.8, 124.1, 123.9, 75.2, 40.5, 33.9, 30.0, 22.3, 14.0. IR (ATR)  $\nu_{\text{max}}/\text{cm}^{-1}$ : 3550, 2954, 2926, 2868, 2854, 1055, 864, 817, 808, 779, 738, 472. HRMS (ESI-TOF)  $m/z$  calcd for  $\text{C}_{20}\text{H}_{22}\text{NaOS}$   $[\text{M}+\text{Na}]^+$  333.1284, found 333.1285.

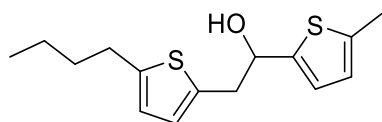

**2-(5-butylthiophen-2-yl)-1-(5-methylthiophen-2-yl)ethan-1-ol (4ai).** Yellow oil (113 mg, 68%);  $R_f$  0.38 (Petroleum ether/Et<sub>2</sub>O, 90/10, v/v). <sup>1</sup>H NMR (400 MHz, CDCl<sub>3</sub>)  $\delta$  6.77 (d,  $J$  = 3.5 Hz, 1H), 6.67 (d,  $J$  = 3.3 Hz, 1H), 6.60 (td,  $J$  = 3.5, 3.0, 1.8 Hz, 2H), 5.02 (dd,  $J$  = 7.8, 5.0 Hz, 1H), 3.28–3.18 (m, 2H), 2.75 (t,  $J$  = 7.6 Hz, 2H), 2.47 (d,  $J$  = 1.1 Hz, 3H), 1.65–1.60 (m, 2H), 1.41–1.35 (m, 2H), 0.93 (t,  $J$  = 7.3 Hz, 3H). <sup>13</sup>C NMR (100 MHz, CDCl<sub>3</sub>)  $\delta$  145.3, 144.7, 139.5, 137.0, 126.2, 124.8, 124.1, 123.8, 71.2, 40.4, 33.9, 30.0, 22.3, 15.5, 13.9 ppm. IR (ATR)  $\nu_{\max}/\text{cm}^{-1}$ : 3365, 2953, 2922, 2854, 1456, 1436, 1028, 794, 532. HRMS (ESI-TOF)  $m/z$  calcd for C<sub>15</sub>H<sub>19</sub>S<sub>2</sub> [M-H<sub>2</sub>O+H]<sup>+</sup> 263.0923, found 263.0915.

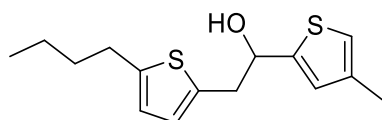

**2-(5-butylthiophen-2-yl)-1-(4-methylthiophen-2-yl)ethan-1-ol (4aj).** Colorless oil (122 mg, 73%);  $R_f$  0.43 (Petroleum ether/Et<sub>2</sub>O, 90:10, v/v). <sup>1</sup>H NMR (400 MHz, CDCl<sub>3</sub>)  $\delta$  6.82 (dd,  $J$  = 6.3, 1.3 Hz, 2H), 6.68 (d,  $J$  = 3.4 Hz, 1H), 6.61 (d,  $J$  = 3.4 Hz, 1H), 5.05 (dd,  $J$  = 8.1, 4.7 Hz, 1H), 3.27 (dd,  $J$  = 14.8, 4.7 Hz, 1H), 3.21 (dd,  $J$  = 14.7, 8.2 Hz, 1H), 2.76 (t,  $J$  = 7.6 Hz, 2H), 2.23 (d,  $J$  = 0.8 Hz, 3H), 1.63 (tt,  $J$  = 7.7, 6.4 Hz, 2H), 1.42–1.35 (m, 2H), 0.93 (t,  $J$  = 7.4 Hz, 3H). <sup>13</sup>C NMR (100 MHz, CDCl<sub>3</sub>)  $\delta$  146.9, 145.4, 137.4, 136.9, 126.5, 126.2, 123.8, 120.0, 71.1, 40.5, 33.9, 30.0, 22.3, 15.9, 13.9. IR (ATR)  $\nu_{\max}/\text{cm}^{-1}$ : 3360, 2953, 2924, 2856, 1458, 1436, 1028, 796, 731, 594. HRMS (ESI-TOF)  $m/z$  calcd for C<sub>15</sub>H<sub>19</sub>S<sub>2</sub> [M-H<sub>2</sub>O+H]<sup>+</sup> 263.0923, found 263.0920.

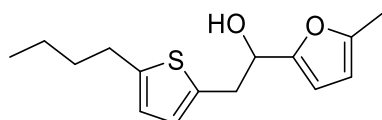

**2-(5-butylthiophen-2-yl)-1-(5-methylfuran-2-yl)ethan-1-ol (4ak).** Yellow oil (102 mg, 64%);  $R_f$  0.29 (Petroleum ether/Et<sub>2</sub>O, 90/10, v/v). <sup>1</sup>H NMR (400 MHz, CDCl<sub>3</sub>)  $\delta$  6.66 (d,  $J$  = 3.4 Hz, 1H), 6.59 (d,  $J$  = 3.4 Hz, 1H), 6.14 (d,  $J$  = 3.1 Hz, 1H), 5.91 (dd,  $J$  = 3.1, 1.1 Hz, 1H), 4.82 (dd,  $J$  = 7.6, 5.5 Hz, 1H), 3.32–3.22 (m, 2H), 2.75 (t,  $J$  = 7.6 Hz, 2H), 2.30 (s, 3H), 1.65–1.59 (m, 2H), 1.41–1.34 (m, 2H), 0.93 (t,  $J$  = 7.3 Hz, 3H). <sup>13</sup>C NMR (100 MHz, CDCl<sub>3</sub>)  $\delta$  153.6, 152.0, 145.2, 137.0, 126.1, 123.8, 107.6, 106.3, 68.6, 36.8, 33.9, 30.0, 22.3, 13.9, 13.7. IR (ATR)  $\nu_{\max}/\text{cm}^{-1}$ : 3419, 2954, 2924, 2856, 1558, 1456, 1219, 1056, 1018, 781. HRMS (ESI-TOF)  $m/z$  calcd for C<sub>15</sub>H<sub>19</sub>OS [M-H<sub>2</sub>O+H]<sup>+</sup> 247.1151, found 247.1143.

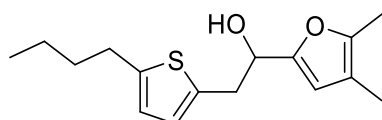

**2-(5-butylthiophen-2-yl)-1-(4,5-dimethylfuran-2-yl)ethan-1-ol (4al).** Yellow oil (95 mg, 57%);  $R_f$  0.31 (Petroleum ether/Et<sub>2</sub>O, 90/10, v/v). <sup>1</sup>H NMR (400 MHz, Toluene-*d*<sub>8</sub>)  $\delta$  6.55–6.49 (m, 1H), 6.46–6.42 (m, 1H), 5.82 (s, 1H), 4.66 (dd,  $J$  = 7.4, 5.5 Hz, 1H), 3.20 (dd,  $J$  = 14.7, 5.4 Hz, 1H), 3.14 (dd,  $J$  = 14.8, 7.5 Hz, 1H), 2.55 (t,  $J$  = 7.6 Hz, 2H), 1.98 (s, 3H), 1.73 (s, 3H), 1.52–1.44 (m, 2H), 1.21 (dq,  $J$  = 14.6, 7.4 Hz, 2H),

0.81 (t,  $J = 7.4$  Hz, 3H ppm).  $^{13}\text{C NMR}$  (100 MHz,  $\text{CDCl}_3$ )  $\delta$  152.4, 147.1, 145.1, 137.1, 126.0, 123.8, 114.6, 110.0, 68.6, 36.7, 33.9, 29.9, 22.3, 13.9, 11.4, 10.0. IR (ATR)  $\nu_{\text{max}}/\text{cm}^{-1}$ : 3365, 2954, 2922, 2856, 1456, 1436, 1220, 1029, 796. HRMS (ESI-TOF)  $m/z$  calcd for  $\text{C}_{16}\text{H}_{21}\text{OS}$   $[\text{M}-\text{H}_2\text{O}+\text{H}]^+$  261.1308, found 261.1320.

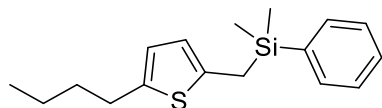

**((5-butylthiophen-2-yl)methyl)dimethyl(phenyl)silane (4am).** Colorless oil (143 mg, 83%);  $R_f$  0.72 (Petroleum ether).  $^1\text{H NMR}$  (400 MHz,  $\text{CDCl}_3$ )  $\delta$  7.52–7.46 (m, 2H), 7.36 (tt,  $J = 4.1, 2.6$  Hz, 3H), 6.51–6.47 (m, 1H), 6.32 (d,  $J = 3.3$  Hz, 1H), 2.70 (t,  $J = 7.6$  Hz, 2H), 2.43 (s, 2H), 1.63–1.57 (m, 2H), 1.39–1.33 (m, 2H), 0.92 (t,  $J = 7.3$  Hz, 3H), 0.31 (s, 6H).  $^{13}\text{C NMR}$  (100 MHz,  $\text{CDCl}_3$ )  $\delta$  142.1, 138.9, 138.4, 133.8, 129.2, 127.9, 123.7, 123.2, 34.0, 29.9, 22.3, 19.8, 14.0, -3.2 ppm. IR (ATR)  $\nu_{\text{max}}/\text{cm}^{-1}$ : 2954, 2926, 2856, 1425, 1247, 1112, 1066, 829, 813, 794, 725, 696, 464. HRMS (ESI-TOF)  $m/z$  calcd for  $\text{C}_{17}\text{H}_{25}\text{SSi}$   $[\text{M}+\text{H}]^+$  289.1441, found 289.1430.

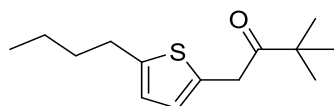

**1-(5-butylthiophen-2-yl)-3,3-dimethylbutan-2-one (4an).** White oil (85 mg, 60%);  $R_f$  0.55 (Petroleum ether/ $\text{Et}_2\text{O}$ , 98/2, v/v).  $^1\text{H NMR}$  (400 MHz,  $\text{CDCl}_3$ )  $\delta$  6.66–6.62 (m, 1H), 6.60 (dt,  $J = 3.3, 1.0$  Hz, 1H), 3.93 (s, 2H), 2.76 (t,  $J = 7.6$  Hz, 2H), 1.67–1.60 (m, 2H), 1.42–1.35 (m, 2H), 1.20 (s, 9H), 0.92 (t,  $J = 7.3$  Hz, 3H).  $^{13}\text{C NMR}$  (100 MHz,  $\text{CDCl}_3$ )  $\delta$  211.7, 145.5, 133.5, 126.1, 123.5, 44.7, 37.6, 33.8, 29.9, 26.5, 22.3, 13.9 ppm. IR (ATR)  $\nu_{\text{max}}/\text{cm}^{-1}$ : 2956, 2927, 2870, 1712, 1647, 1477, 1458, 1365, 1058, 999, 804, 781. HRMS (ESI-TOF)  $m/z$  calcd for  $\text{C}_{14}\text{H}_{21}\text{S}$   $[\text{M}-\text{H}_2\text{O}+\text{H}]^+$  221.1358, found 221.1351.

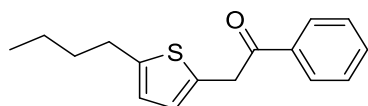

**2-(5-butylthiophen-2-yl)-1-phenylethan-1-one (4ao).** Yellow oil (102 mg, 70%);  $R_f$  0.42 (Petroleum ether/ $\text{Et}_2\text{O}$ , 98/2, v/v).  $^1\text{H NMR}$  (400 MHz,  $\text{CDCl}_3$ )  $\delta$  8.07–8.02 (m, 2H), 7.65–7.56 (m, 1H), 7.54–7.45 (m, 2H), 6.74 (d,  $J = 3.4$  Hz, 1H), 6.64 (d,  $J = 3.4$  Hz, 1H), 4.43 (s, 2H), 2.78 (t,  $J = 7.6$  Hz, 2H), 1.65 (q,  $J = 7.7$  Hz, 2H), 1.44–1.36 (m, 2H), 0.94 (t,  $J = 7.3$  Hz, 3H).  $^{13}\text{C NMR}$  (100 MHz,  $\text{CDCl}_3$ )  $\delta$  196.4, 145.9, 136.3, 133.4, 132.9, 128.8, 128.8, 126.5, 123.9, 39.8, 33.8, 29.9, 22.3, 14.0. IR (ATR)  $\nu_{\text{max}}/\text{cm}^{-1}$ : 2924, 2854, 1687, 1593, 1448, 1213, 987, 794, 754, 686, 655, 559, 497. HRMS (ESI-TOF)  $m/z$  calcd for  $\text{C}_{16}\text{H}_{17}\text{OS}$   $[\text{M}-\text{H}_2+\text{H}]^+$  257.0995, found 257.0986.

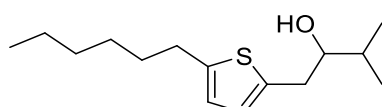

**1-(5-hexylthiophen-2-yl)-3-methylbutan-2-ol (4bb).** Colorless oil (95 mg, 63%);  $R_f$  0.55 (Petroleum ether/ $\text{Et}_2\text{O}$ , 90/10, v/v).  $^1\text{H NMR}$  (400 MHz,  $\text{CDCl}_3$ )  $\delta$  6.66 (d,  $J = 3.3$  Hz, 1H), 6.60 (d,  $J = 3.3$  Hz, 1H), 3.54

(ddd,  $J = 9.0, 5.5, 3.4$  Hz, 1H), 2.97 (dd,  $J = 14.7, 3.2$  Hz, 1H), 2.82–2.73 (m, 3H), 1.80–1.71 (m, 1H), 1.64 (dd,  $J = 13.3, 5.5$  Hz, 3H), 1.38–1.28 (m, 6H), 0.99 (d,  $J = 6.8$  Hz, 6H), 0.92–0.86 (m, 3H).  $^{13}\text{C}$  NMR (100 MHz,  $\text{CDCl}_3$ )  $\delta$  145.0, 138.6, 125.6, 123.8, 77.3, 35.4, 33.0, 31.8, 31.7, 30.3, 29.0, 22.7, 19.0, 17.7, 14.2. IR (ATR)  $\nu_{\text{max}}/\text{cm}^{-1}$ : 3387, 2955, 2924, 2854, 1465, 1379, 1365, 1041, 993, 792. HRMS (ESI-TOF)  $m/z$  calcd for  $\text{C}_{15}\text{H}_{25}\text{S}$   $[\text{M}-\text{H}_2\text{O}+\text{H}]^+$  237.1671, found 237.1649.

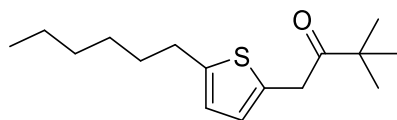

**1-(5-hexylthiophen-2-yl)-3,3-dimethylbutan-2-one (4bn).** Colorless oil (91 mg, 55%);  $R_f$  0.62 (Petroleum ether/ $\text{Et}_2\text{O}$ , 98/2, v/v).  $^1\text{H}$  NMR (400 MHz,  $\text{CDCl}_3$ )  $\delta$  6.64 (d,  $J = 3.3$  Hz, 1H), 6.59 (d,  $J = 3.4$  Hz, 1H), 3.93 (s, 2H), 2.75 (t,  $J = 7.7$  Hz, 2H), 1.64 (p,  $J = 7.4$  Hz, 2H), 1.38–1.27 (m, 6H), 1.20 (s, 9H), 0.90–0.86 (m, 3H).  $^{13}\text{C}$  NMR (100 MHz,  $\text{CDCl}_3$ )  $\delta$  211.7, 145.6, 133.5, 126.1, 123.5, 44.7, 37.6, 31.7, 30.2, 28.9, 26.5, 22.7, 14.2. IR (ATR)  $\nu_{\text{max}}/\text{cm}^{-1}$ : 2954, 2926, 2854, 1714, 1475, 1458, 1363, 1058, 999, 781. HRMS (ESI-TOF)  $m/z$  calcd for  $\text{C}_{16}\text{H}_{27}\text{OS}$   $[\text{M}+\text{H}]^+$  267.1777, found 267.1795.

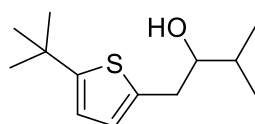

**1-(5-(tert-butyl)thiophen-2-yl)-3-methylbutan-2-ol (4cb).** Colorless oil (81 mg, 60%);  $R_f$  0.5 (Petroleum ether/ $\text{Et}_2\text{O}$ , 90/10, v/v).  $^1\text{H}$  NMR (400 MHz,  $\text{CDCl}_3$ )  $\delta$  6.67–6.63 (m, 2H), 3.55 (ddd,  $J = 9.1, 5.5, 3.3$  Hz, 1H), 2.97 (dd,  $J = 14.7, 3.3$  Hz, 1H), 2.78 (dd,  $J = 14.7, 9.1$  Hz, 1H), 1.75 (ddd,  $J = 13.6, 6.8, 5.5$  Hz, 1H), 1.67 (bs, 1H), 1.36 (s, 9H), 0.99 (d,  $J = 6.8$  Hz, 6H).  $^{13}\text{C}$  NMR (100 MHz,  $\text{CDCl}_3$ )  $\delta$  156.5, 138.2, 125.3, 121.1, 77.3, 35.4, 34.6, 33.1, 32.6, 19.0, 17.7. IR (ATR)  $\nu_{\text{max}}/\text{cm}^{-1}$ : 3385, 2957, 2868, 1460, 1363, 1257, 1043, 993, 794. HRMS (ESI-TOF)  $m/z$  calcd for  $\text{C}_{13}\text{H}_{22}\text{NaOS}$   $[\text{M}+\text{Na}]^+$  249.1284, found 249.1277.

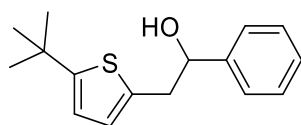

**2-(5-(tert-butyl)thiophen-2-yl)-1-phenylethan-1-ol (4ce).** Colorless oil (90 mg, 58%);  $R_f$  0.36 (Petroleum ether/ $\text{Et}_2\text{O}$ , 90/10, v/v).  $^1\text{H}$  NMR (400 MHz,  $\text{CDCl}_3$ )  $\delta$  7.41–7.34 (m, 5H), 6.66 (d,  $J = 0.9$  Hz, 2H), 4.88 (dd,  $J = 8.8, 4.2$  Hz, 1H), 3.20–3.14 (m, 1H), 3.11 (dd,  $J = 14.9, 8.8$  Hz, 1H), 2.22 (s, 1H), 1.37 (s, 9H).  $^{13}\text{C}$  NMR (100 MHz,  $\text{CDCl}_3$ )  $\delta$  156.9, 143.6, 137.2, 128.6, 127.8, 126.0, 125.7, 121.1, 75.1, 40.7, 34.6, 32.6. IR (ATR)  $\nu_{\text{max}}/\text{cm}^{-1}$ : 3394, 2958, 2900, 2864, 1489, 1456, 1361, 1255, 1043, 1024, 794, 698. HRMS (ESI-TOF)  $m/z$  calcd for  $\text{C}_{16}\text{H}_{19}\text{S}$   $[\text{M}-\text{H}_2\text{O}+\text{H}]^+$  243.1202, found 243.1216.

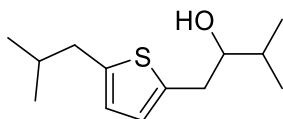

**1-(5-isobutylthiophen-2-yl)-3-methylbutan-2-ol (4db).** Colorless oil (73 mg, 54%);  $R_f$  0.5 (Petroleum ether/Et<sub>2</sub>O, 90/10, v/v). <sup>1</sup>H NMR (400 MHz, CDCl<sub>3</sub>)  $\delta$  6.66 (d,  $J$  = 3.3 Hz, 1H), 6.58 (d,  $J$  = 3.3 Hz, 1H), 3.54 (ddd,  $J$  = 8.9, 5.5, 3.4 Hz, 1H), 2.97 (dd,  $J$  = 14.7, 3.1 Hz, 1H), 2.79 (dd,  $J$  = 14.7, 9.1 Hz, 1H), 2.62 (d,  $J$  = 7.0 Hz, 2H), 1.86 (dt,  $J$  = 13.5, 6.8 Hz, 1H), 1.75 (pd,  $J$  = 6.8, 5.5 Hz, 1H), 1.65 (bs, 1H), 0.99 (d,  $J$  = 6.8 Hz, 6H), 0.94 (d,  $J$  = 6.8 Hz, 6H). <sup>13</sup>C NMR (100 MHz, CDCl<sub>3</sub>)  $\delta$  143.5, 138.9, 125.6, 124.8, 77.3, 39.6, 35.5, 33.1, 30.7, 22.4, 19.0, 17.7. IR (ATR)  $\nu_{\max}/\text{cm}^{-1}$ : 3381, 2955, 2868, 1463, 1382, 1365, 1039, 993, 790. HRMS (ESI-TOF)  $m/z$  calcd for C<sub>13</sub>H<sub>22</sub>NaOS [M+Na]<sup>+</sup> 249.1284, found 249.1262.

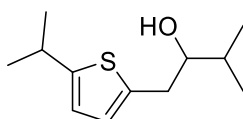

**1-(5-isopropylthiophen-2-yl)-3-methylbutan-2-ol (4eb).** Colorless oil (88 mg, 70%);  $R_f$  0.48 (Petroleum ether/Et<sub>2</sub>O, 90/10, v/v). <sup>1</sup>H NMR (400 MHz, CDCl<sub>3</sub>)  $\delta$  6.66 (d,  $J$  = 3.3 Hz, 1H), 6.63 (dd,  $J$  = 3.4, 1.0 Hz, 1H), 3.55 (ddd,  $J$  = 9.0, 5.5, 3.3 Hz, 1H), 3.11 (h,  $J$  = 6.8 Hz, 1H), 2.97 (dd,  $J$  = 14.7, 3.2 Hz, 1H), 2.79 (dd,  $J$  = 14.7, 9.1 Hz, 1H), 1.80–1.72 (m, 1H), 1.71 (bs,  $J$  = 9.1 Hz, 1H), 1.31 (d,  $J$  = 6.9 Hz, 6H), 0.99 (d,  $J$  = 6.8 Hz, 6H). <sup>13</sup>C NMR (100 MHz, CDCl<sub>3</sub>)  $\delta$  152.4, 138.2, 125.4, 121.7, 77.3, 35.4, 33.1, 30.1, 24.8, 24.8, 19.0, 17.6. IR (ATR)  $\nu_{\max}/\text{cm}^{-1}$ : 3385, 2958, 2870, 1460, 1382, 1363, 1039, 993, 794. HRMS (ESI-TOF)  $m/z$  calcd for C<sub>12</sub>H<sub>19</sub>S [M-H<sub>2</sub>O+H]<sup>+</sup> 195.1202, found 195.1206.

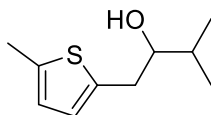

**3-Methyl-1-(5-methylthiophen-2-yl)butan-2-ol (4fb).** Colorless oil (40 mg, 37%);  $R_f$  0.43 (Petroleum ether/Et<sub>2</sub>O, 90/10, v/v). <sup>1</sup>H NMR (400 MHz, CDCl<sub>3</sub>)  $\delta$  6.64 (d,  $J$  = 3.3 Hz, 1H), 6.60–6.57 (m, 1H), 3.53 (ddd,  $J$  = 9.0, 5.5, 3.5 Hz, 1H), 2.96 (dd,  $J$  = 14.7, 3.5 Hz, 1H), 2.78 (dd,  $J$  = 14.7, 9.0 Hz, 1H), 2.44 (s, 3H), 1.79–1.71 (m, 1H), 0.98 (d,  $J$  = 6.8 Hz, 6H). <sup>13</sup>C NMR (100 MHz, CDCl<sub>3</sub>)  $\delta$  139.0, 138.7, 125.9, 125.0, 77.3, 35.4, 33.0, 19.0, 17.6, 15.4. IR (ATR)  $\nu_{\max}/\text{cm}^{-1}$ : 3385, 2956, 2918, 2870, 1465, 1365, 1238, 1045, 993, 790. HRMS (ESI-TOF)  $m/z$  calcd for C<sub>10</sub>H<sub>16</sub>NaOS [M+Na]<sup>+</sup> 207.0814, found 207.0821.

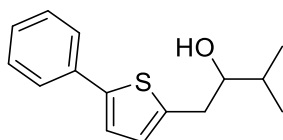

**3-Methyl-1-(5-phenylthiophen-2-yl)butan-2-ol (4gb).** Colorless oil (90 mg, 60%);  $R_f$  0.21 (Petroleum ether/Et<sub>2</sub>O, 90/10, v/v). <sup>1</sup>H NMR (400 MHz, CDCl<sub>3</sub>)  $\delta$  7.34–7.28 (m, 2H), 7.27–7.21 (m, 3H), 6.76 (d,  $J$  = 3.4 Hz, 1H), 6.64 (d,  $J$  = 3.4 Hz, 1H), 4.51 (dd,  $J$  = 6.9, 3.3 Hz, 1H), 4.11 (s, 2H), 1.96 (dq,  $J$  = 13.5, 6.8 Hz, 1H), 1.88 (s, 1H), 1.03 (d,  $J$  = 6.6 Hz, 3H), 0.86 (d,  $J$  = 6.8 Hz, 3H). <sup>13</sup>C NMR (100 MHz, CDCl<sub>3</sub>)  $\delta$  146.2, 143.4, 140.3, 128.7, 128.7, 126.6, 124.5, 124.2, 76.3, 36.5, 35.8.

19.1, 18.5. **IR** (ATR)  $\nu_{\max}/\text{cm}^{-1}$ : 3381, 2957, 2868, 1494, 1452, 1026, 1005, 792, 696. **HRMS (ESI-TOF)**  $m/z$  calcd for  $\text{C}_{15}\text{H}_{17}\text{S}$   $[\text{M}-\text{H}_2\text{O}+\text{H}]^+$  229.1051, found 229.1049.

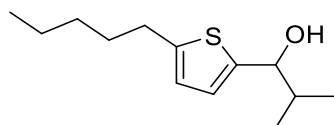

**2-Methyl-1-(5-pentylthiophen-2-yl)propan-1-ol (6ab).** Colorless oil (95 mg, 69%);  $R_f$  0.42 (Petroleum ether/ $\text{Et}_2\text{O}$ , 90/10, v/v).  **$^1\text{H}$  NMR** (400 MHz,  $\text{CDCl}_3$ )  $\delta$  6.74 (d,  $J = 3.4$  Hz, 1H), 6.61 (dt,  $J = 3.4, 1.0$  Hz, 1H), 4.51 (d,  $J = 7.1$  Hz, 1H), 2.77 (t,  $J = 7.7$  Hz, 2H), 1.97 (dq,  $J = 13.6, 6.8$  Hz, 1H), 1.87 (bs, 1H), 1.70–1.62 (m, 2H), 1.34 (h,  $J = 3.7, 3.2$  Hz, 4H), 1.04 (d,  $J = 6.6$  Hz, 3H), 0.92–0.85 (m, 6H).  **$^{13}\text{C}$  NMR** (100 MHz,  $\text{CDCl}_3$ )  $\delta$  145.4, 144.9, 124.2, 123.3, 76.4, 35.9, 31.5, 30.3, 22.6, 19.2, 18.6, 14.2. **IR** (ATR)  $\nu_{\max}/\text{cm}^{-1}$ : 3354, 2954, 2926, 2856, 1458, 1004, 796. **HRMS (ESI-TOF)**  $m/z$  calcd for  $\text{C}_{13}\text{H}_{21}\text{S}$   $[\text{M}-\text{H}_2\text{O}+\text{H}]^+$  209.1358, found 209.1369.

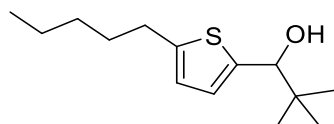

**2,2-Dimethyl-1-(5-pentylthiophen-2-yl)propan-1-ol (6ac).** Colorless oil (89 mg, 62%);  $R_f$  0.59 (Petroleum ether/ $\text{Et}_2\text{O}$ , 90/10, v/v).  **$^1\text{H}$  NMR** (400 MHz,  $\text{CDCl}_3$ )  $\delta$  6.73 (d,  $J = 3.4$  Hz, 1H), 6.62 (d,  $J = 3.4$  Hz, 1H), 4.56 (s, 1H), 2.76 (t,  $J = 7.7$  Hz, 2H), 1.66 (p,  $J = 7.4$  Hz, 2H), 1.34 (dq,  $J = 7.2, 3.7$  Hz, 4H), 0.98 (s, 9H), 0.92–0.88 (m, 3H).  **$^{13}\text{C}$  NMR** (100 MHz,  $\text{CDCl}_3$ )  $\delta$  145.0, 143.0, 125.1, 123.0, 79.3, 35.7, 31.5, 31.4, 30.2, 26.1, 22.5, 14.1. **IR** (ATR)  $\nu_{\max}/\text{cm}^{-1}$ : 3429, 2953, 2926, 2856, 1477, 1458, 1361, 1045, 1001, 800, 759. **HRMS (ESI-TOF)**  $m/z$  for pour  $\text{C}_{14}\text{H}_{23}\text{S}$   $[\text{M}-\text{H}_2\text{O}+\text{H}]^+$  223.1515, found 223.1523.

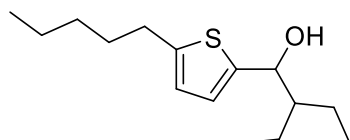

**2-Ethyl-1-(5-pentylthiophen-2-yl)butan-1-ol (6ap).** Colorless oil (127 mg, 76%);  $R_f$  0.50 (Petroleum ether/ $\text{Et}_2\text{O}$ , 90/10, v/v).  **$^1\text{H}$  NMR** (400 MHz,  $\text{CDCl}_3$ )  $\delta$  6.74 (d,  $J = 3.4$  Hz, 1H), 6.61 (d,  $J = 3.3$  Hz, 1H), 4.78 (d,  $J = 6.5$  Hz, 1H), 2.77 (t,  $J = 7.6$  Hz, 2H), 1.82 (bs, 1H), 1.73 – 1.62 (m, 2H), 1.58 (ddt,  $J = 11.0, 7.1, 4.0$  Hz, 2H), 1.51–1.44 (m, 1H), 1.35 (dt,  $J = 7.3, 3.9$  Hz, 5H), 1.23 (dp,  $J = 14.3, 7.3$  Hz, 1H), 0.96–0.83 (m, 9H).  **$^{13}\text{C}$  NMR** (100 MHz,  $\text{CDCl}_3$ )  $\delta$  145.4, 145.3, 124.0, 123.3, 72.6, 48.3, 31.5, 31.5, 30.3, 22.5, 22.0, 21.2, 14.1, 11.4, 11.0. **IR** (ATR)  $\nu_{\max}/\text{cm}^{-1}$ : 2956, 2927, 2870, 1458, 1379, 1053, 1029, 798. **HRMS (ESI-TOF)**  $m/z$  calcd for  $\text{C}_{12}\text{H}_{25}\text{S}$   $[\text{M}-\text{H}_2\text{O}+\text{H}]^+$  237.1677, found 237.1685.



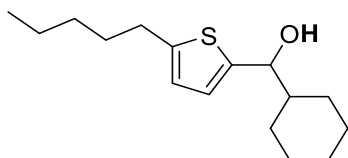

**Cyclohexyl(5-pentylthiophen-2-yl)methanol (6aq).** Colorless oil (150 mg, 87%);  $R_f$  0.43 (Petroleum ether/Et<sub>2</sub>O, 90/10, v/v). <sup>1</sup>H NMR (400 MHz, CDCl<sub>3</sub>)  $\delta$  6.73 (d,  $J$  = 3.3 Hz, 1H), 6.61 (d,  $J$  = 3.3 Hz, 1H), 4.52 (d,  $J$  = 7.5 Hz, 1H), 2.76 (t,  $J$  = 7.7 Hz, 2H), 2.05 (d,  $J$  = 12.7 Hz, 1H), 1.87 (bs, 1H), 1.74–1.58 (m, 5H), 1.57–1.45 (m, 2H), 1.40–1.31 (m, 4H), 1.30–0.91 (m, 5H), 0.94–0.86 (m, 3H). <sup>13</sup>C NMR (100 MHz, CDCl<sub>3</sub>)  $\delta$  145.2, 144.9, 124.1, 123.2, 75.4, 45.4, 31.4, 31.4, 30.3, 29.4, 29.1, 26.5, 26.1, 26.0, 22.5, 14.1. IR (ATR)  $\nu_{\max}/\text{cm}^{-1}$ : 3473, 2953, 2924, 2848, 1448, 1041, 1028, 794. HRMS (ESI-TOF)  $m/z$  calcd for C<sub>16</sub>H<sub>25</sub>S [M-H<sub>2</sub>O+H]<sup>+</sup> 249.1677, found 249.1678.

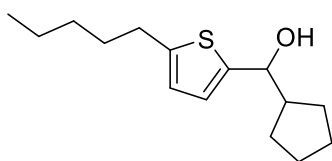

**Cyclopentyl(5-pentylthiophen-2-yl)methanol (6ar).** Colorless oil (125 mg, 80%);  $R_f$  0.38 (Petroleum ether/Et<sub>2</sub>O, 90/10, v/v). <sup>1</sup>H NMR (400 MHz, CDCl<sub>3</sub>)  $\delta$  6.76 (d,  $J$  = 3.4 Hz, 1H), 6.60 (d,  $J$  = 3.0 Hz, 1H), 4.57 (d,  $J$  = 8.5 Hz, 1H), 2.77 (t,  $J$  = 7.7 Hz, 2H), 2.27 (h,  $J$  = 8.2 Hz, 1H), 1.91 (dt,  $J$  = 12.8, 7.2 Hz, 2H), 1.72–1.61 (m, 3H), 1.61–1.49 (m, 5H), 1.40–1.29 (m, 4H), 1.25–1.16 (m, 1H), 0.95–0.84 (m, 3H). <sup>13</sup>C NMR (100 MHz, CDCl<sub>3</sub>)  $\delta$  145.7, 144.4, 123.9, 123.2, 75.0, 47.9, 31.4, 31.4, 30.3, 29.8, 29.7, 25.9, 25.7, 22.5, 14.1 ppm. IR (ATR)  $\nu_{\max}/\text{cm}^{-1}$ : 3363, 2951, 2926, 2856, 1450, 1022, 796. HRMS (ESI-TOF)  $m/z$  calcd for C<sub>15</sub>H<sub>23</sub>S [M-H<sub>2</sub>O+H]<sup>+</sup> 235.1520, found 235.1528.

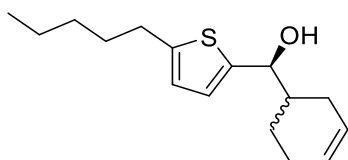

**Cyclohex-3-en-1-yl(5-pentylthiophen-2-yl)methanol (6as).** Colorless oil (107 mg, 66%);  $dr$  = 60:40;  $R_f$  0.51 (Petroleum ether/Et<sub>2</sub>O, 80/20, v/v). *Only the major diastereomer is described:* <sup>1</sup>H NMR (400 MHz, CDCl<sub>3</sub>)  $\delta$  6.77 (d,  $J$  = 3.4 Hz, 1H), 6.61 (d,  $J$  = 3.2 Hz, 1H), 5.65 (d,  $J$  = 30.9 Hz, 2H), 4.64 (d,  $J$  = 7.1 Hz, 1H), 2.77 (t,  $J$  = 7.7 Hz, 2H), 2.40–1.84 (m, 6H), 1.64 (dt,  $J$  = 22.0, 9.9 Hz, 3H), 1.35 (dt,  $J$  = 6.9, 3.7 Hz, 4H), 0.90 (t,  $J$  = 6.9 Hz, 3H). <sup>13</sup>C NMR (100 MHz, CDCl<sub>3</sub>)  $\delta$  145.5, 144.7, 127.0, 126.2, 124.4, 123.3, 74.8, 41.5, 31.4, 30.3, 28.3, 27.9, 25.3, 25.0, 22.5, 14.1. IR (ATR)  $\nu_{\max}/\text{cm}^{-1}$ : 3379, 3020, 2922, 2854, 1456, 1435, 1024, 798, 650. HRMS (ESI-TOF)  $m/z$  calcd for C<sub>16</sub>H<sub>23</sub>S [M-H<sub>2</sub>O+H]<sup>+</sup> 247.1520, found 247.1526.

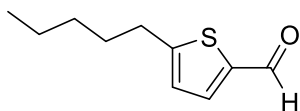

**5-pentylthiophene-2-carbaldehyde (6at).** Colorless oil (67 mg; 61%);  $R_f$  0.40 (Petroleum ether/Et<sub>2</sub>O, 90:10, v/v). <sup>1</sup>H NMR (400 MHz, CDCl<sub>3</sub>)  $\delta$  9.82 (s, 1H), 7.60 (d,  $J$  = 3.7 Hz, 1H), 6.90 (d,  $J$  = 3.7 Hz, 1H), 2.87 (t,  $J$  = 7.6 Hz, 2H), 1.71 (p,  $J$  = 7.4 Hz, 2H), 1.40–1.30 (m, 4H), 0.90 (t,  $J$  = 7.0 Hz, 3H). <sup>13</sup>C NMR (100 MHz,

CDCl<sub>3</sub>)  $\delta$  182.8, 157.9, 141.8, 137.1, 126.0, 31.3, 31.1, 31.0, 22.5, 14.1. **IR** (ATR)  $\nu_{\text{max}}/\text{cm}^{-1}$ : 2956, 2924, 2854, 1662, 1454, 1224, 1037, 806, 669. **HRMS (ESI-TOF)**  $m/z$  calcd for C<sub>10</sub>H<sub>15</sub>OS [M+H]<sup>+</sup> 183.0844, found 183.0846.

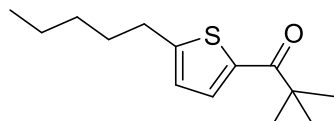

**(5-pentylthiophen-2-yl)(tert-butyl)methanone (6an)**. Colorless oil (66 mg, 47%) ; R<sub>f</sub> 0.56 (Petroleum ether/Et<sub>2</sub>O, 98/2, v/v). **<sup>1</sup>H NMR** (400 MHz, CDCl<sub>3</sub>)  $\delta$  7.61 (d,  $J$  = 3.8 Hz, 1H), 6.78 (dt,  $J$  = 3.8, 0.8 Hz, 1H), 2.81 (t,  $J$  = 7.6 Hz, 2H), 1.70 (p,  $J$  = 7.4 Hz, 2H), 1.38 (s, 9H), 1.37–1.31 (m, 4H), 0.90 (t,  $J$  = 7.1 Hz, 3H). **<sup>13</sup>C NMR** (100 MHz, CDCl<sub>3</sub>)  $\delta$  198.8, 154.3, 140.1, 132.4, 125.2, 43.8, 31.4, 31.2, 30.5, 28.4, 22.5, 14.1. **IR** (ATR)  $\nu_{\text{max}}/\text{cm}^{-1}$ : 2956, 2929, 2858, 1643, 1448, 1282, 1180, 894, 800, 746. **HRMS (ESI-TOF)**  $m/z$  calcd for C<sub>14</sub>H<sub>23</sub>OS [M + H]<sup>+</sup> 239.1470, found 239.1474.

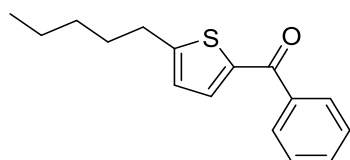

**(5-pentylthiophen-2-yl)(phenyl)methanone (6ao)**. Colorless oil (88 mg, 62%); R<sub>f</sub> 0.53 (Petroleum ether/Et<sub>2</sub>O, 95/5, v/v). **<sup>1</sup>H NMR** (400 MHz, CDCl<sub>3</sub>)  $\delta$  7.89–7.80 (m, 2H), 7.56 (m, 1H), 7.52–7.44 (m, 3H), 6.85 (d,  $J$  = 3.8 Hz, 1H), 2.88 (t,  $J$  = 7.6 Hz, 2H), 1.73 (p,  $J$  = 7.4 Hz, 2H), 1.46–1.30 (m, 4H), 0.91 (t,  $J$  = 7.0 Hz, 3H). **<sup>13</sup>C NMR** (100 MHz, CDCl<sub>3</sub>)  $\delta$  188.0, 156.6, 141.1, 138.4, 135.5, 132.0, 129.1, 128.4, 125.6, 31.3, 31.1, 30.7, 22.4, 14.0. **IR** (ATR)  $\nu_{\text{max}}/\text{cm}^{-1}$ : 2953, 2926, 2854, 1625, 1450, 1288, 1043, 1024, 860, 812, 711, 698, 640. **HRMS (ESI-TOF)**  $m/z$  calcd for C<sub>16</sub>H<sub>19</sub>OS [M+H]<sup>+</sup> 259.1157, found 259.1166.

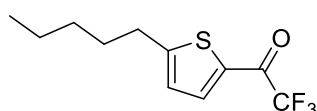

**2,2,2-Trifluoro-1-(5-pentylthiophen-2-yl)ethan-1-one (6au)**. Colorless oil (98 mg, 64%); R<sub>f</sub> 0.90 (Petroleum ether/Et<sub>2</sub>O, 95/5, v/v). **<sup>1</sup>H NMR** (400 MHz, CDCl<sub>3</sub>)  $\delta$  7.81 (dd,  $J$  = 3.7, 1.5 Hz, 1H), 6.93 (d,  $J$  = 4.0 Hz, 1H), 2.90 (t,  $J$  = 7.6 Hz, 2H), 1.73 (p,  $J$  = 7.4 Hz, 2H), 1.41–1.30 (m, 4H), 0.91 (t,  $J$  = 7.0 Hz, 3H). **<sup>13</sup>C NMR** (100 MHz, CDCl<sub>3</sub>)  $\delta$  173.2, 161.4, 137.3, 133.9, 127.0, 116.8, 31.3, 31.0, 30.9, 22.4, 14.0. **<sup>19</sup>F NMR** (375 MHz, CDCl<sub>3</sub>)  $\delta$  -72.05 (s, 3F). **IR** (ATR)  $\nu_{\text{max}}/\text{cm}^{-1}$ : 2957, 2929, 2914, 1681, 1444, 1203, 1176, 1139, 1053, 867, 750, 731. **HRMS (ESI-TOF)**  $m/z$  calcd for C<sub>11</sub>H<sub>14</sub>F<sub>3</sub>OS [M+H]<sup>+</sup> 251.0717, found 251.0717.

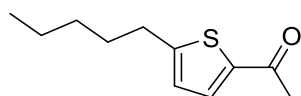

**1-(5-pentylthiophen-2-yl)ethan-1-one (6av)**. Colorless oil (64 mg, 56%); R<sub>f</sub> 0.68 (Petroleum ether/Et<sub>2</sub>O, 95/5, v/v). **<sup>1</sup>H NMR** (400 MHz, CDCl<sub>3</sub>)  $\delta$  7.53 (d,  $J$  = 3.8 Hz, 1H), 6.81 (d,  $J$  = 3.8 Hz, 1H), 2.83 (t,  $J$  = 7.6 Hz, 2H), 2.51 (s, 3H), 1.70 (p,  $J$  = 7.4 Hz, 2H), 1.35 (dq,  $J$  = 7.1, 3.6 Hz, 4H), 0.95–0.85 (m, 3H). **<sup>13</sup>C NMR** (100

MHz, CDCl<sub>3</sub>)  $\delta$  190.5, 156.1, 142.1, 132.9, 125.6, 31.3, 31.1, 30.7, 26.6, 22.4, 14.0. **IR** (ATR)  $\nu_{\text{max}}/\text{cm}^{-1}$ : 2957, 2926, 2854, 1654, 1452, 1355, 1274, 1028, 925, 806, 607, 561. **HRMS (ESI-TOF)**  $m/z$  calcd C<sub>11</sub>H<sub>17</sub>OS for [M+H]<sup>+</sup> 197.1000, found 197.1004.

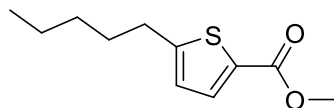

**Methyl 5-pentylthiophene-2-carboxylate (6aw).** Colorless oil (84 mg, 65%); R<sub>f</sub> 0.63 (Petroleum ether/Et<sub>2</sub>O, 95/5, v/v). **<sup>1</sup>H NMR** (400 MHz, CDCl<sub>3</sub>)  $\delta$  7.62 (d,  $J$  = 3.7 Hz, 1H), 6.77 (d,  $J$  = 3.7 Hz, 1H), 3.85 (s, 3H), 2.81 (t,  $J$  = 7.6 Hz, 2H), 1.68 (p,  $J$  = 7.3 Hz, 2H), 1.33 (h,  $J$  = 3.8 Hz, 4H), 0.93–0.84 (m, 3H). **<sup>13</sup>C NMR** (100 MHz, CDCl<sub>3</sub>)  $\delta$  162.9, 154.2, 133.8, 130.6, 125.2, 52.0, 31.3, 31.2, 30.5, 22.4, 14.0. **IR** (ATR)  $\nu_{\text{max}}/\text{cm}^{-1}$ : 2953, 2926, 2854, 1707, 1458, 1444, 1286, 1255, 1190, 1091, 812, 748. **HRMS (ESI-TOF)**  $m/z$  calcd for C<sub>11</sub>H<sub>17</sub>OS [M+H]<sup>+</sup> 213.0949, found 213.0953.

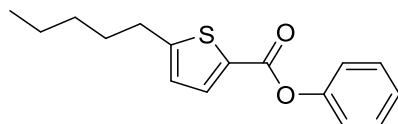

**Phenyl 5-pentylthiophene-2-carboxylate (6ax).** Colorless oil (126 mg, 76%); R<sub>f</sub> 0.44 (Petroleum ether/Et<sub>2</sub>O, 98/2, v/v). **<sup>1</sup>H NMR** (400 MHz, CDCl<sub>3</sub>)  $\delta$  7.81 (d,  $J$  = 3.7 Hz, 1H), 7.41 (t,  $J$  = 7.9 Hz, 2H), 7.26 (t,  $J$  = 3.7 Hz, 1H), 7.21 (d,  $J$  = 8.0 Hz, 2H), 6.86 (d,  $J$  = 3.8 Hz, 1H), 2.88 (t,  $J$  = 7.6 Hz, 2H), 1.73 (p,  $J$  = 7.3 Hz, 2H), 1.40–1.34 (m, 4H), 0.92 (t,  $J$  = 6.8 Hz, 3H). **<sup>13</sup>C NMR** (100 MHz, CDCl<sub>3</sub>)  $\delta$  160.8, 155.6, 150.9, 135.1, 130.0, 129.6, 126.0, 125.6, 121.8, 31.3, 31.3, 30.7, 22.5, 14.1. **IR** (ATR)  $\nu_{\text{max}}/\text{cm}^{-1}$ : 2956, 2926, 2854, 1724, 1490, 1456, 1269, 1247, 1190, 1056, 736, 686. **HRMS (ESI-TOF)**  $m/z$  calcd for C<sub>16</sub>H<sub>19</sub>O<sub>2</sub>S [M+H]<sup>+</sup> 275.1106, found 275.1105.

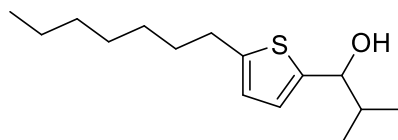

**1-(5-heptylthiophen-2-yl)-2-methylpropan-1-ol (6bb).** Colorless oil (102 mg, 67%); R<sub>f</sub> 0.54 (Petroleum ether/Et<sub>2</sub>O, 90/10, v/v). **<sup>1</sup>H NMR** (400 MHz, CDCl<sub>3</sub>)  $\delta$  6.74 (d,  $J$  = 3.4 Hz, 1H), 6.61 (d,  $J$  = 3.4 Hz, 1H), 4.51 (d,  $J$  = 7.2 Hz, 1H), 2.76 (t,  $J$  = 7.6 Hz, 2H), 1.97 (dq,  $J$  = 13.5, 6.8 Hz, 1H), 1.65 (p,  $J$  = 7.7 Hz, 2H), 1.40–1.22 (m, 8H), 1.04 (d,  $J$  = 6.7 Hz, 3H), 0.93–0.84 (m, 6H). **<sup>13</sup>C NMR** (100 MHz, CDCl<sub>3</sub>)  $\delta$  145.4, 144.9, 124.2, 123.3, 76.4, 35.9, 31.9, 31.8, 30.3, 29.2, 29.2, 22.8, 19.2, 18.6, 14.2. **IR** (ATR)  $\nu_{\text{max}}/\text{cm}^{-1}$ : 3385, 2954, 2922, 2852, 1465, 1458, 1049, 1022, 794. **HRMS (ESI-TOF)**  $m/z$  calcd for C<sub>15</sub>H<sub>25</sub>S [M-H<sub>2</sub>O+H]<sup>+</sup> 237.1677, found 237.1685.

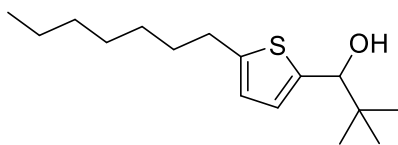

**1-(5-heptylthiophen-2-yl)-2,2-dimethylpropan-1-ol (6bc).** Yellow oil (107 mg, 59%);  $R_f$  0.30 (Petroleum ether/Et<sub>2</sub>O, 90/10, v/v). <sup>1</sup>H NMR (400 MHz, CDCl<sub>3</sub>)  $\delta$  6.73 (d,  $J$  = 3.4 Hz, 1H), 6.62 (dt,  $J$  = 3.4, 0.8 Hz, 1H), 4.56 (s, 1H), 2.76 (t,  $J$  = 7.7 Hz, 2H), 1.96 (bs, 1H), 1.66 (p,  $J$  = 7.4 Hz, 2H), 1.43–1.21 (m, 9H), 0.98 (s, 9H), 0.94–0.85 (m, 3H). <sup>13</sup>C NMR (100 MHz, CDCl<sub>3</sub>)  $\delta$  145.1, 143.1, 125.1, 123.0, 79.3, 35.8, 31.9, 31.8, 30.3, 29.2, 29.2, 26.1, 22.8, 14.2. IR (ATR)  $\nu_{max}/cm^{-1}$ : 3442, 2953, 2924, 2852, 1460, 1361, 1043, 1001, 800, 759. HRMS (ESI-TOF)  $m/z$  calcd for C<sub>16</sub>H<sub>27</sub>S [M-H<sub>2</sub>O+H]<sup>+</sup> 251.1833, found 251.1836.

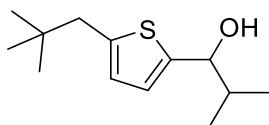

**1-(5-neopentylthiophen-2-yl)-2-methylpropan-1-ol (6cb).** Colorless oil (97 mg, 72%);  $R_f$  0.30 (Petroleum ether/Et<sub>2</sub>O, 90/10, v/v). <sup>1</sup>H NMR (400 MHz, CDCl<sub>3</sub>)  $\delta$  6.77 (d,  $J$  = 3.4 Hz, 1H), 6.59 (d,  $J$  = 3.4 Hz, 1H), 4.52 (d,  $J$  = 7.1 Hz, 1H), 2.65 (s, 2H), 1.98 (dq,  $J$  = 13.6, 6.8 Hz, 1H), 1.88 (bs, 1H), 1.04 (d,  $J$  = 6.6 Hz, 3H), 0.95 (s,  $J$  = 7.2 Hz, 9H), 0.86 (d,  $J$  = 6.7 Hz, 3H). <sup>13</sup>C NMR (100 MHz, CDCl<sub>3</sub>)  $\delta$  145.5, 141.2, 125.9, 124.0, 76.3, 44.5, 35.9, 31.7, 29.4, 19.2, 18.6. IR (ATR)  $\nu_{max}/cm^{-1}$ : 2951, 2902, 2866, 1465, 1363, 1051, 798. HRMS (ESI-TOF)  $m/z$  calcd for C<sub>13</sub>H<sub>21</sub>S [M-H<sub>2</sub>O+H]<sup>+</sup> 209.1364, found 209.1362.

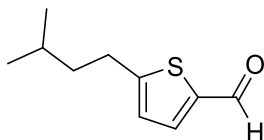

**5-isopentylthiophene-2-carbaldehyde (6dt).** Colorless oil (63 mg, 69%);  $R_f$  0.42 (Petroleum ether/Et<sub>2</sub>O, 90/10, v/v). <sup>1</sup>H (400 MHz, CDCl<sub>3</sub>)  $\delta$  9.81 (s, 1H), 7.60 (d,  $J$  = 3.7 Hz, 1H), 6.90 (d,  $J$  = 3.7 Hz, 1H), 2.87 (t,  $J$  = 7.4 Hz, 2H), 1.77–1.43 (m, 3H), 0.94 (d,  $J$  = 6.2 Hz, 6H). <sup>13</sup>C NMR (100 MHz, CDCl<sub>3</sub>)  $\delta$  182.7, 158.0, 141.7, 137.1, 125.8, 40.4, 28.9, 27.6, 22.4. IR (ATR)  $\nu_{max}/cm^{-1}$ : 2954, 2870, 2360, 1660, 1456, 1220, 1039, 864, 754, 669. HRMS (ESI-TOF)  $m/z$  calcd for C<sub>10</sub>H<sub>15</sub>OS [M+H]<sup>+</sup> 183.0844, found 183.0843.

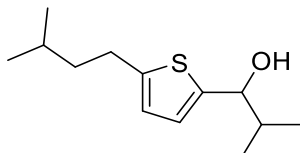

**1-(5-isopentylthiophen-2-yl)-2-methylpropan-1-ol (6db).** Colorless oil (73 mg, 54%);  $R_f$  0.55 (Petroleum Ether/Et<sub>2</sub>O, 90/10, v/v). <sup>1</sup>H NMR (400 MHz, CDCl<sub>3</sub>)  $\delta$  6.74 (d,  $J$  = 3.4 Hz, 1H), 6.61 (d,  $J$  = 3.5 Hz, 1H), 4.51 (d,  $J$  = 6.8 Hz, 1H), 2.78 (t,  $J$  = 7.7 Hz, 2H), 1.97 (dq,  $J$  = 13.5, 6.8 Hz, 1H), 1.88 (s, 1H), 1.67–1.52 (m, 3H), 1.04 (d,  $J$  = 6.6 Hz, 3H), 0.93 (d,  $J$  = 6.4 Hz, 6H), 0.87 (d,  $J$  = 6.8 Hz, 3H). <sup>13</sup>C NMR (100 MHz, CDCl<sub>3</sub>)  $\delta$  145.5, 144.9, 124.2, 123.2, 76.4, 40.9, 35.9, 28.2, 27.7, 22.6, 22.5, 19.2, 18.6. IR (ATR)  $\nu_{max}/cm^{-1}$ : 3383, 2954, 2926, 2870, 1465, 1365, 1004, 796. HRMS (ESI-TOF)  $m/z$  calcd for C<sub>13</sub>H<sub>21</sub>S [M-H<sub>2</sub>O+H]<sup>+</sup> 209.1364, found 209.1368.

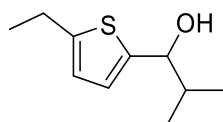

**1-(5-ethylthiophen-2-yl)-2-methylpropan-1-ol (6eb).** Colorless oil (72 mg, 65%);  $R_f$  0.32 (Petroleum ether/Et<sub>2</sub>O, 90/10, v/v). <sup>1</sup>H NMR (400 MHz, CDCl<sub>3</sub>)  $\delta$  6.75 (d,  $J$  = 3.4 Hz, 1H), 6.63 (d,  $J$  = 3.4 Hz, 1H), 4.51 (d,  $J$  = 7.1 Hz, 1H), 2.82 (q,  $J$  = 7.5 Hz, 2H), 1.97 (td,  $J$  = 13.5, 6.7 Hz, 1H), 1.44 (s, 1H), 1.30 (t,  $J$  = 7.5 Hz, 3H), 1.05 (d,  $J$  = 6.7 Hz, 3H), 0.87 (d,  $J$  = 6.8 Hz, 3H). <sup>13</sup>C NMR (100 MHz, CDCl<sub>3</sub>)  $\delta$  146.8, 144.8, 124.2, 122.6, 76.3, 35.8, 23.6, 19.1, 18.6, 16.0. IR (ATR)  $\nu_{\max}/\text{cm}^{-1}$ : 3365, 2960, 2926, 2872, 1456, 1018, 1002, 800, 698. HRMS (ESI-TOF)  $m/z$  calcd for C<sub>10</sub>H<sub>15</sub>S [M-H<sub>2</sub>O + H]<sup>+</sup> 167.0894, found 167.0892.

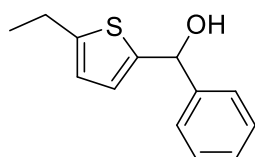

**(5-ethylthiophen-2-yl)(phenyl)methanol (6ee).** Colorless oil (64 mg, 49%);  $R_f$  0.35 (Petroleum ether/Et<sub>2</sub>O, 90/10, v/v). <sup>1</sup>H NMR (400 MHz, CDCl<sub>3</sub>)  $\delta$  7.50–7.42 (m, 2H), 7.42–7.28 (m, 3H), 6.70 (d,  $J$  = 3.3 Hz, 1H), 6.61 (dt,  $J$  = 3.4, 1.1 Hz, 1H), 5.99 (s, 1H), 2.79 (q,  $J$  = 7.5 Hz, 2H), 1.27 (t,  $J$  = 7.5 Hz, 3H). <sup>13</sup>C NMR (100 MHz, CDCl<sub>3</sub>)  $\delta$  148.0, 145.3, 143.3, 128.6, 128.0, 126.3, 124.9, 122.8, 72.6, 23.6, 15.9. IR (ATR)  $\nu_{\max}/\text{cm}^{-1}$ : 3392, 2962, 2924, 1490, 1450, 1024, 906, 796, 729, 696. HRMS (ESI-TOF)  $m/z$  calcd for C<sub>13</sub>H<sub>13</sub>S [M-H<sub>2</sub>O+H]<sup>+</sup> 201.0732, found 201.0746.

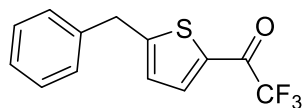

**1-(5-benzylthiophen-2-yl)-2,2,2-trifluoroethan-1-one (6fu).** Yellow oil (71 mg, 58%);  $R_f$  0.24 (Petroleum ether/Et<sub>2</sub>O, 95/5, v/v). <sup>1</sup>H NMR (400 MHz, CDCl<sub>3</sub>)  $\delta$  7.81 (dd,  $J$  = 3.7, 1.5 Hz, 1H), 7.37–7.32 (m, 2H), 7.32–7.28 (m, 1H), 7.27–7.23 (m, 2H), 6.94 (d,  $J$  = 4.0 Hz, 2H), 4.21 (s, 1H). <sup>13</sup>C NMR (100 MHz, CDCl<sub>3</sub>)  $\delta$  173.4, 159.4, 138.3, 137.2, 134.8, 129.1, 128.8, 127.7, 127.4, 116.6, 37.0. <sup>19</sup>F NMR (375 MHz, CDCl<sub>3</sub>)  $\delta$  -72.12 (s, 3F). IR (ATR)  $\nu_{\max}/\text{cm}^{-1}$ : 3030, 1681, 1440, 1174, 1139, 1055, 867, 731, 696. HRMS (ESI-TOF)  $m/z$  calcd for C<sub>13</sub>H<sub>9</sub>F<sub>3</sub>OS [M+H]<sup>+</sup> 271.0404; found 271.0407.

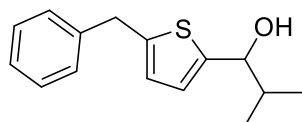

**1-(5-benzylthiophen-2-yl)-2-methylpropan-1-ol (6fb).** Colorless oil (71 mg, 50%);  $R_f$  0.24 (Petroleum ether/Et<sub>2</sub>O, 95/5, v/v). <sup>1</sup>H NMR (400 MHz, CDCl<sub>3</sub>)  $\delta$  7.35–7.29 (m, 2H), 7.28–7.20 (m, 3H), 6.76 (d,  $J$  = 3.4 Hz, 1H), 6.64 (d,  $J$  = 3.4 Hz, 1H), 4.51 (d,  $J$  = 6.9 Hz, 1H), 4.11 (s, 2H), 1.96 (dq,  $J$  = 13.5, 6.7 Hz, 1H), 1.90 (s, 1H), 1.03 (d,  $J$  = 6.7 Hz, 3H), 0.87 (d,  $J$  = 6.8 Hz, 3H). <sup>13</sup>C NMR (100 MHz, CDCl<sub>3</sub>)  $\delta$  146.2, 143.4, 140.3, 128.7, 128.6, 126.6, 124.5, 124.2, 76.3, 36.5, 35.8, 19.1, 18.5. IR (ATR)  $\nu_{\max}/\text{cm}^{-1}$ : 3381, 3061, 3026, 2956, 2868, 1492, 1452, 1002, 792, 696. HRMS (ESI-TOF)  $m/z$  calcd for C<sub>15</sub>H<sub>17</sub>S [M-H<sub>2</sub>O+H]<sup>+</sup> 229.1051, found 229.1055.

**NMR spectra related to substrates 1 and products 4 and 6**

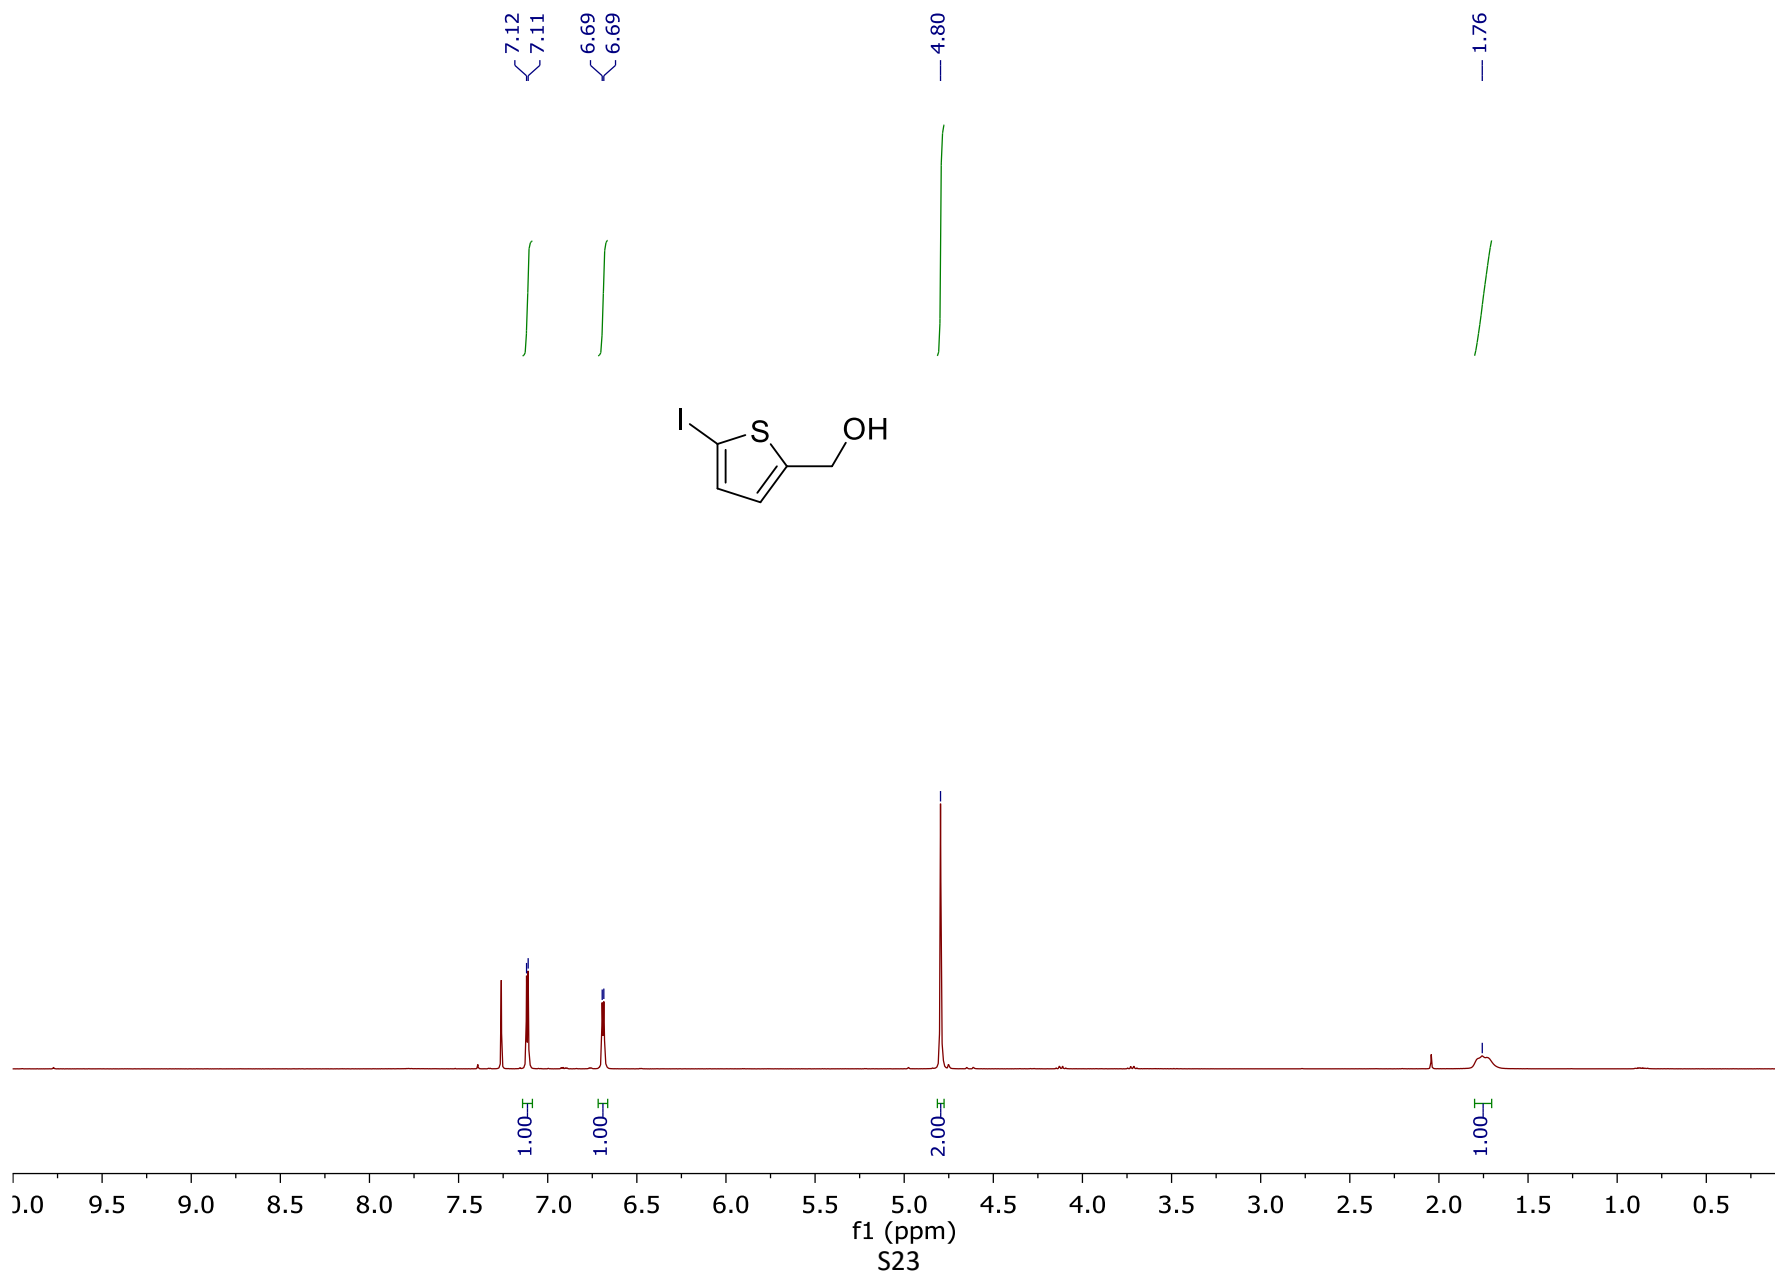

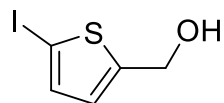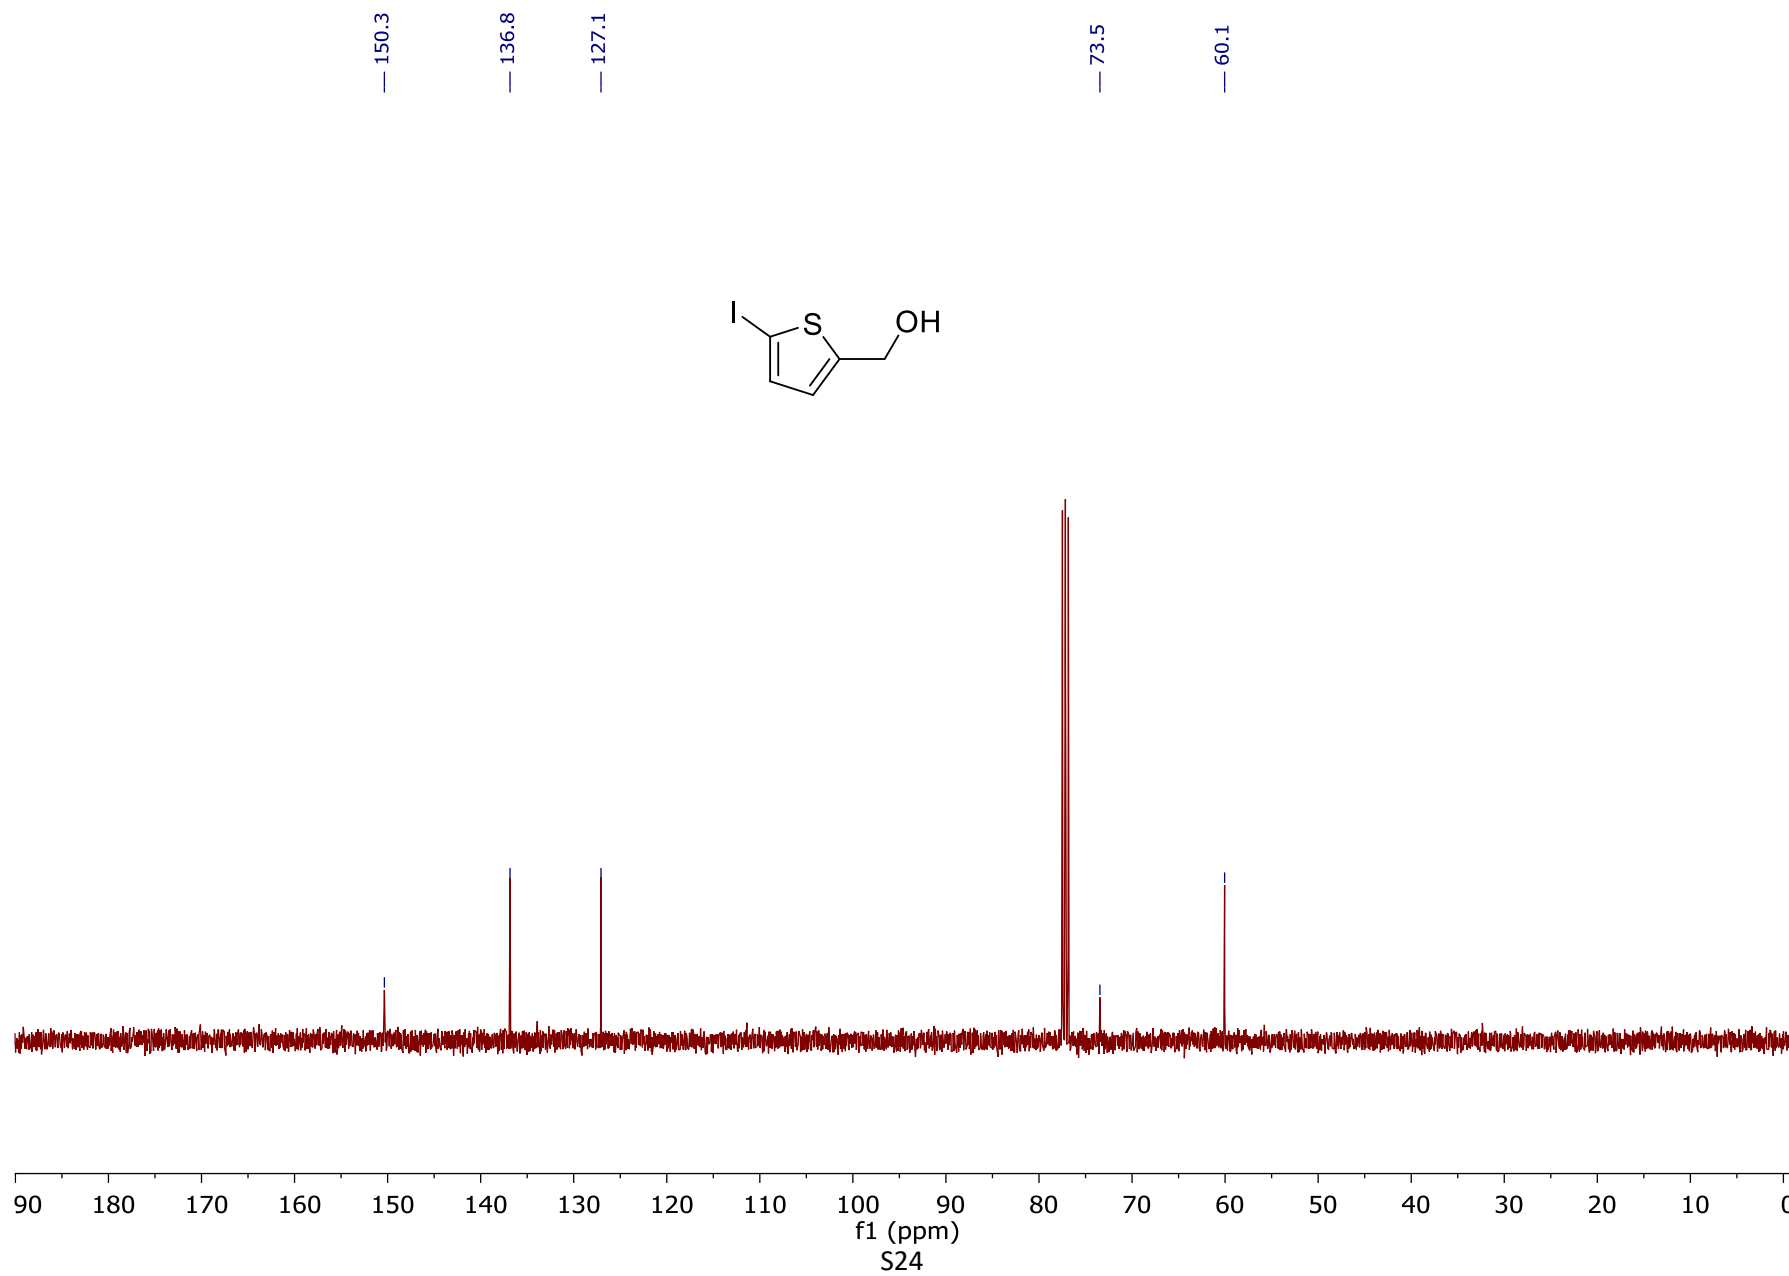



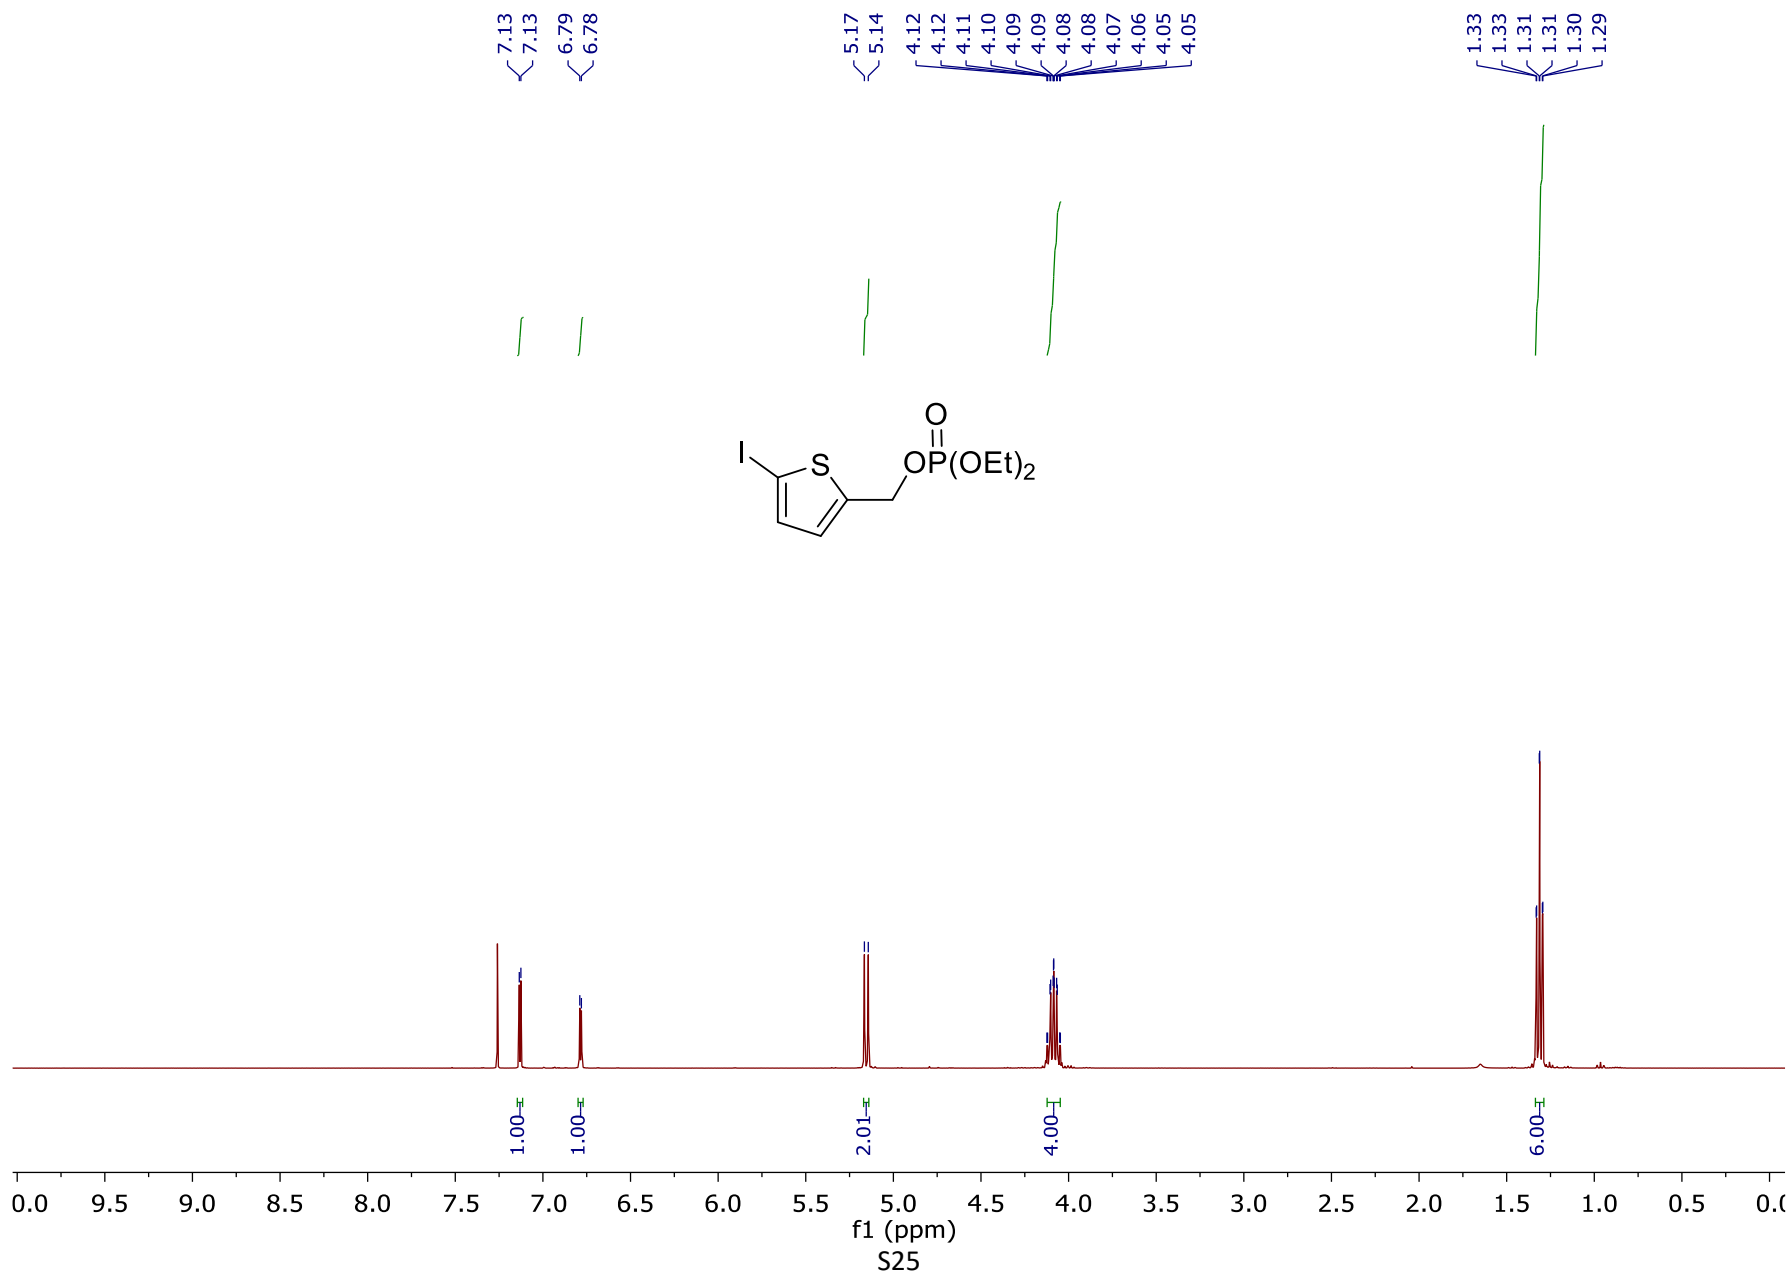

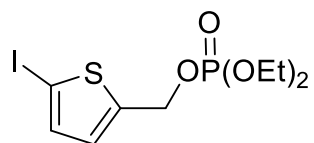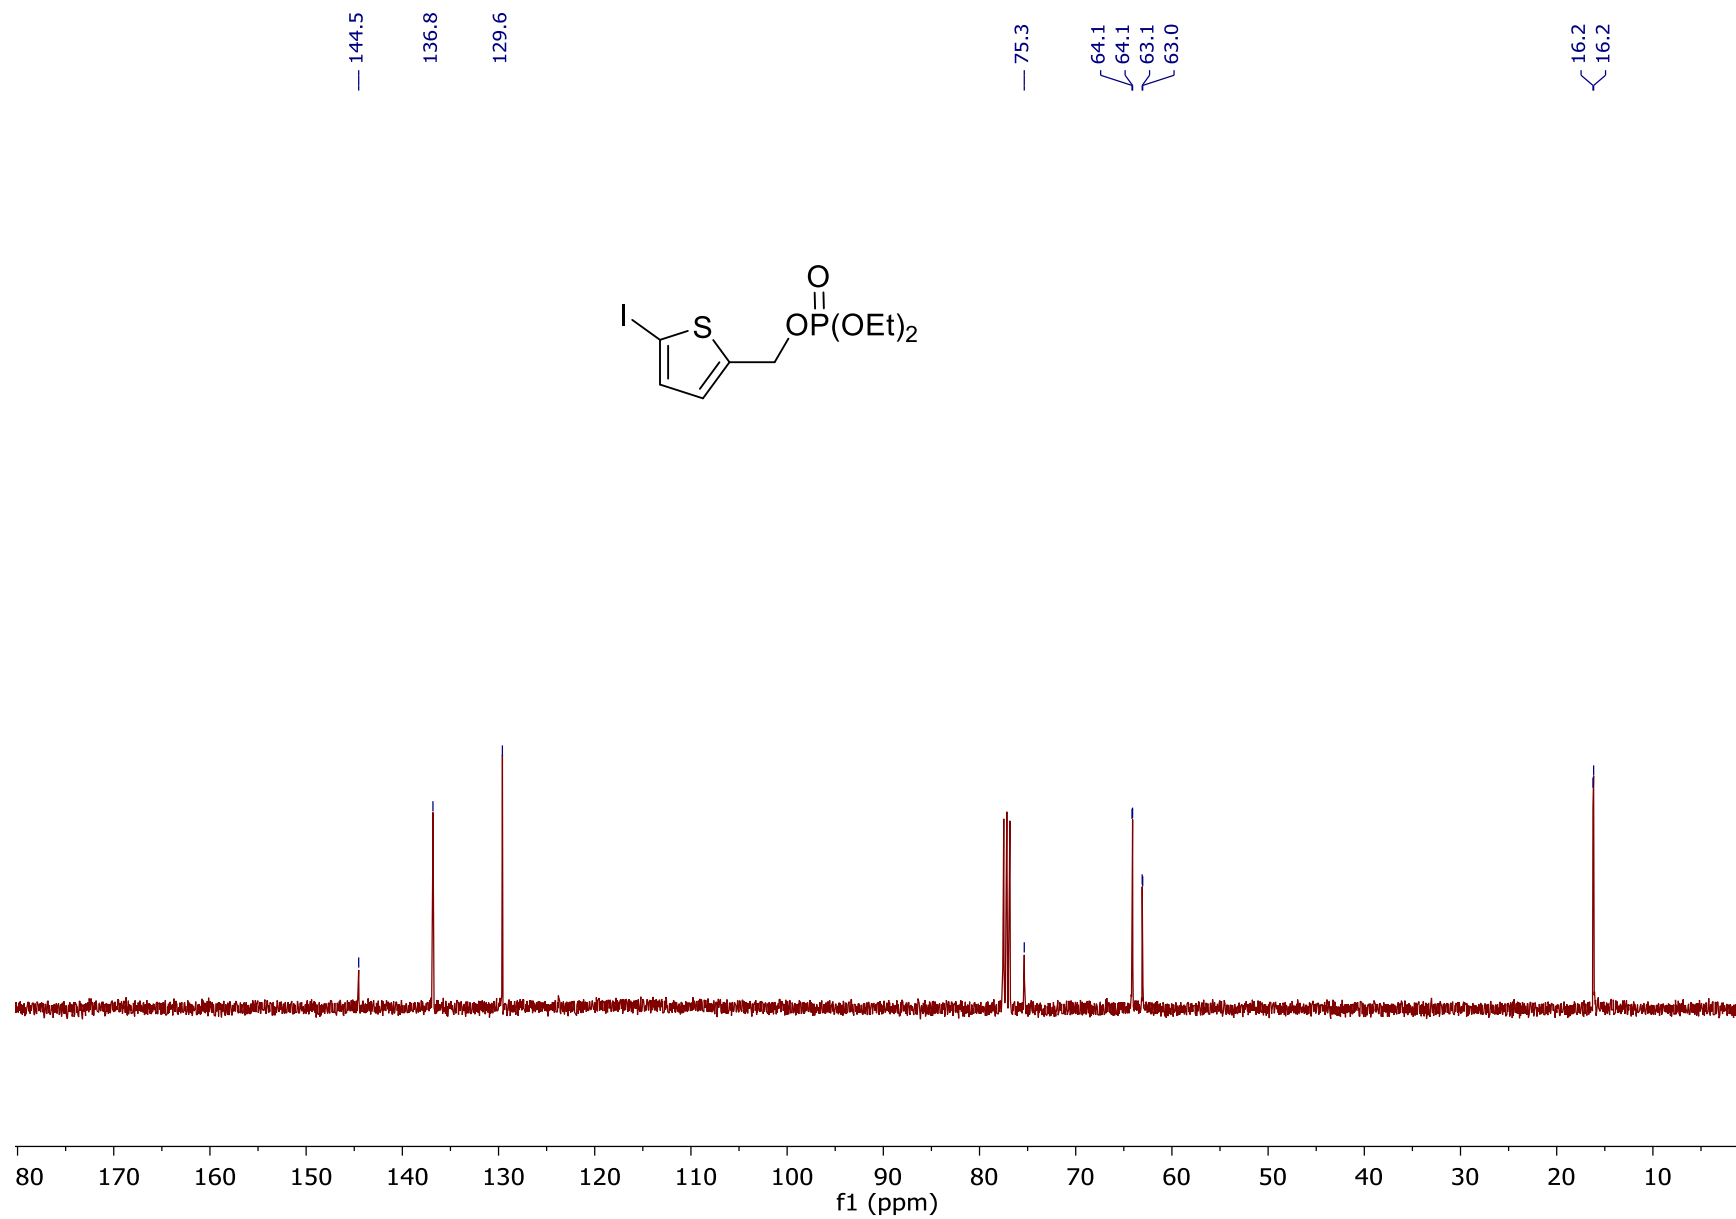

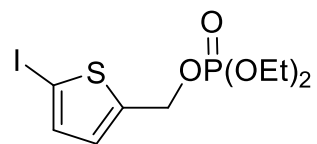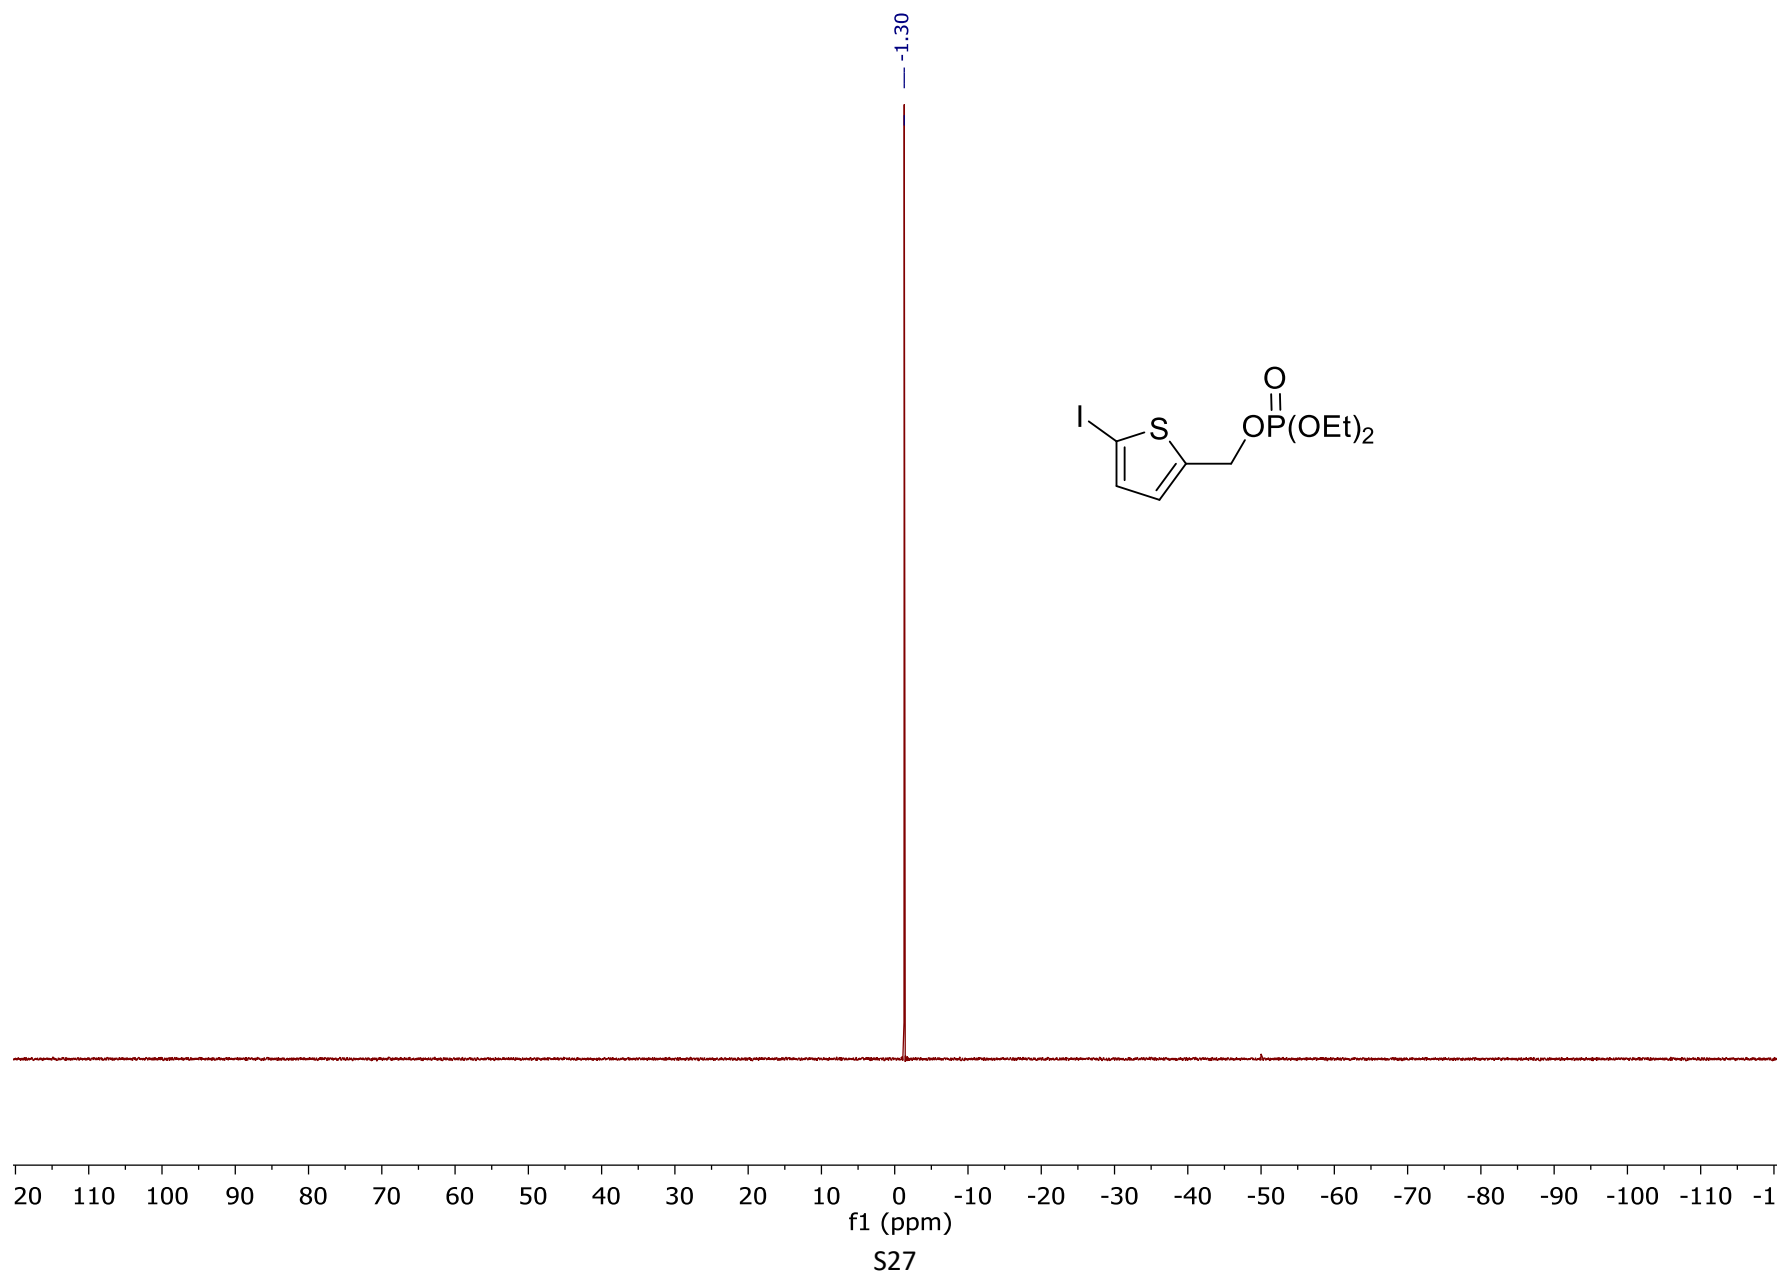

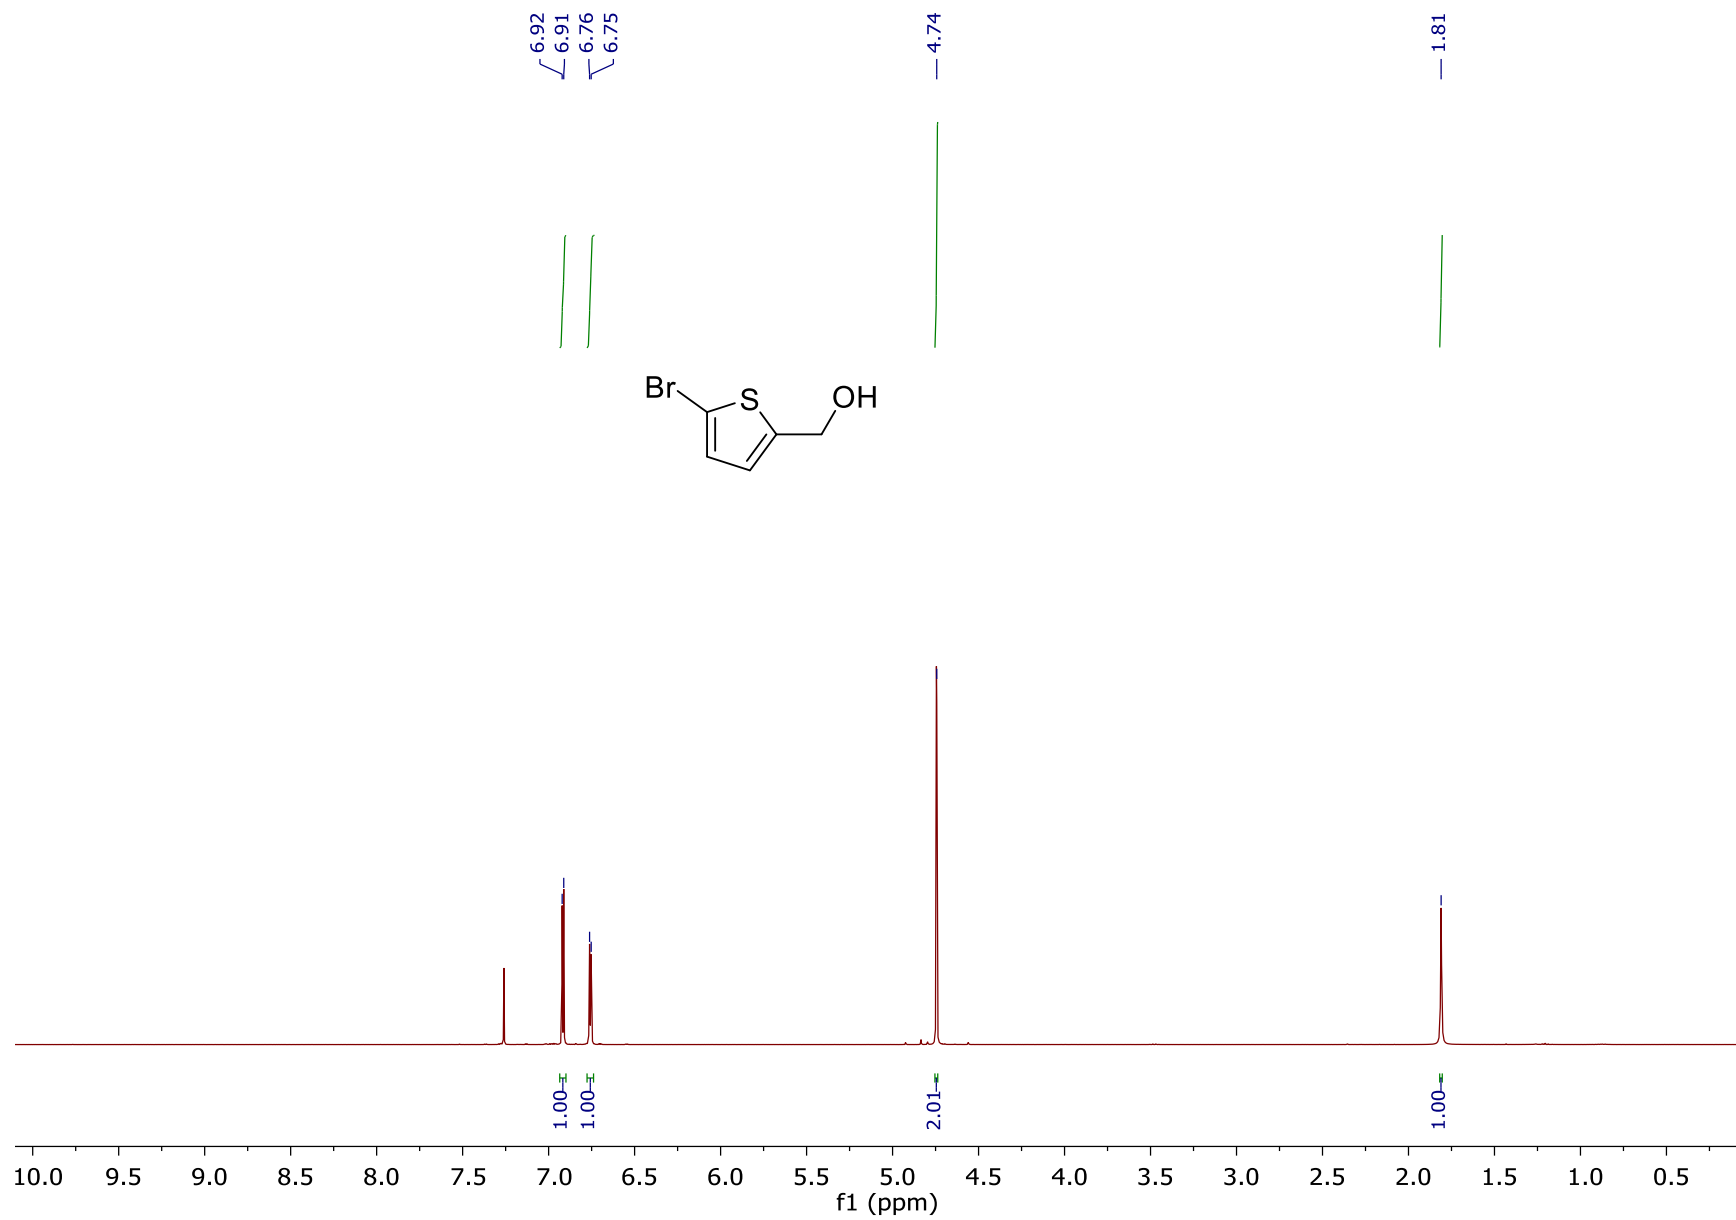

S28

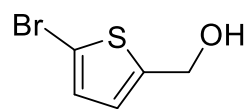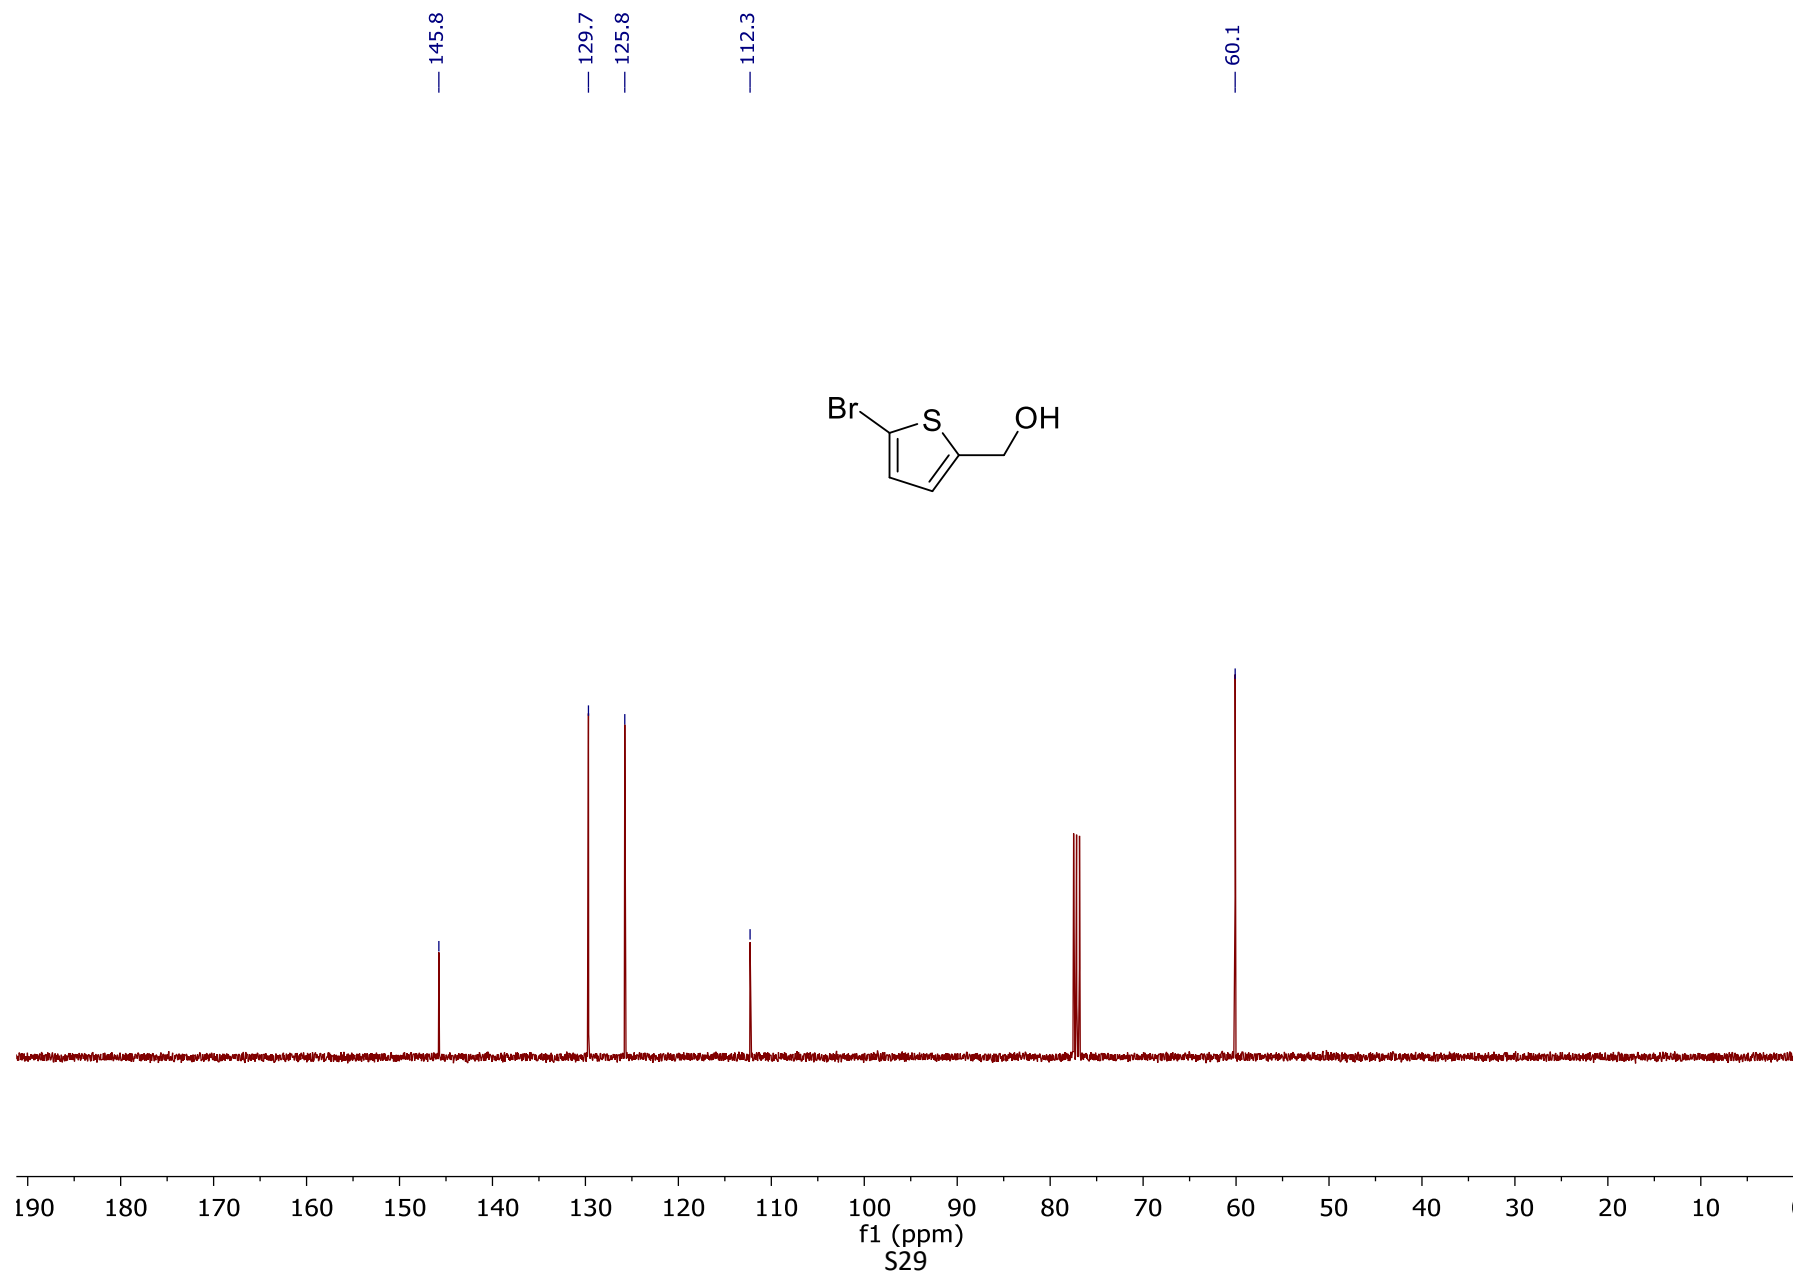

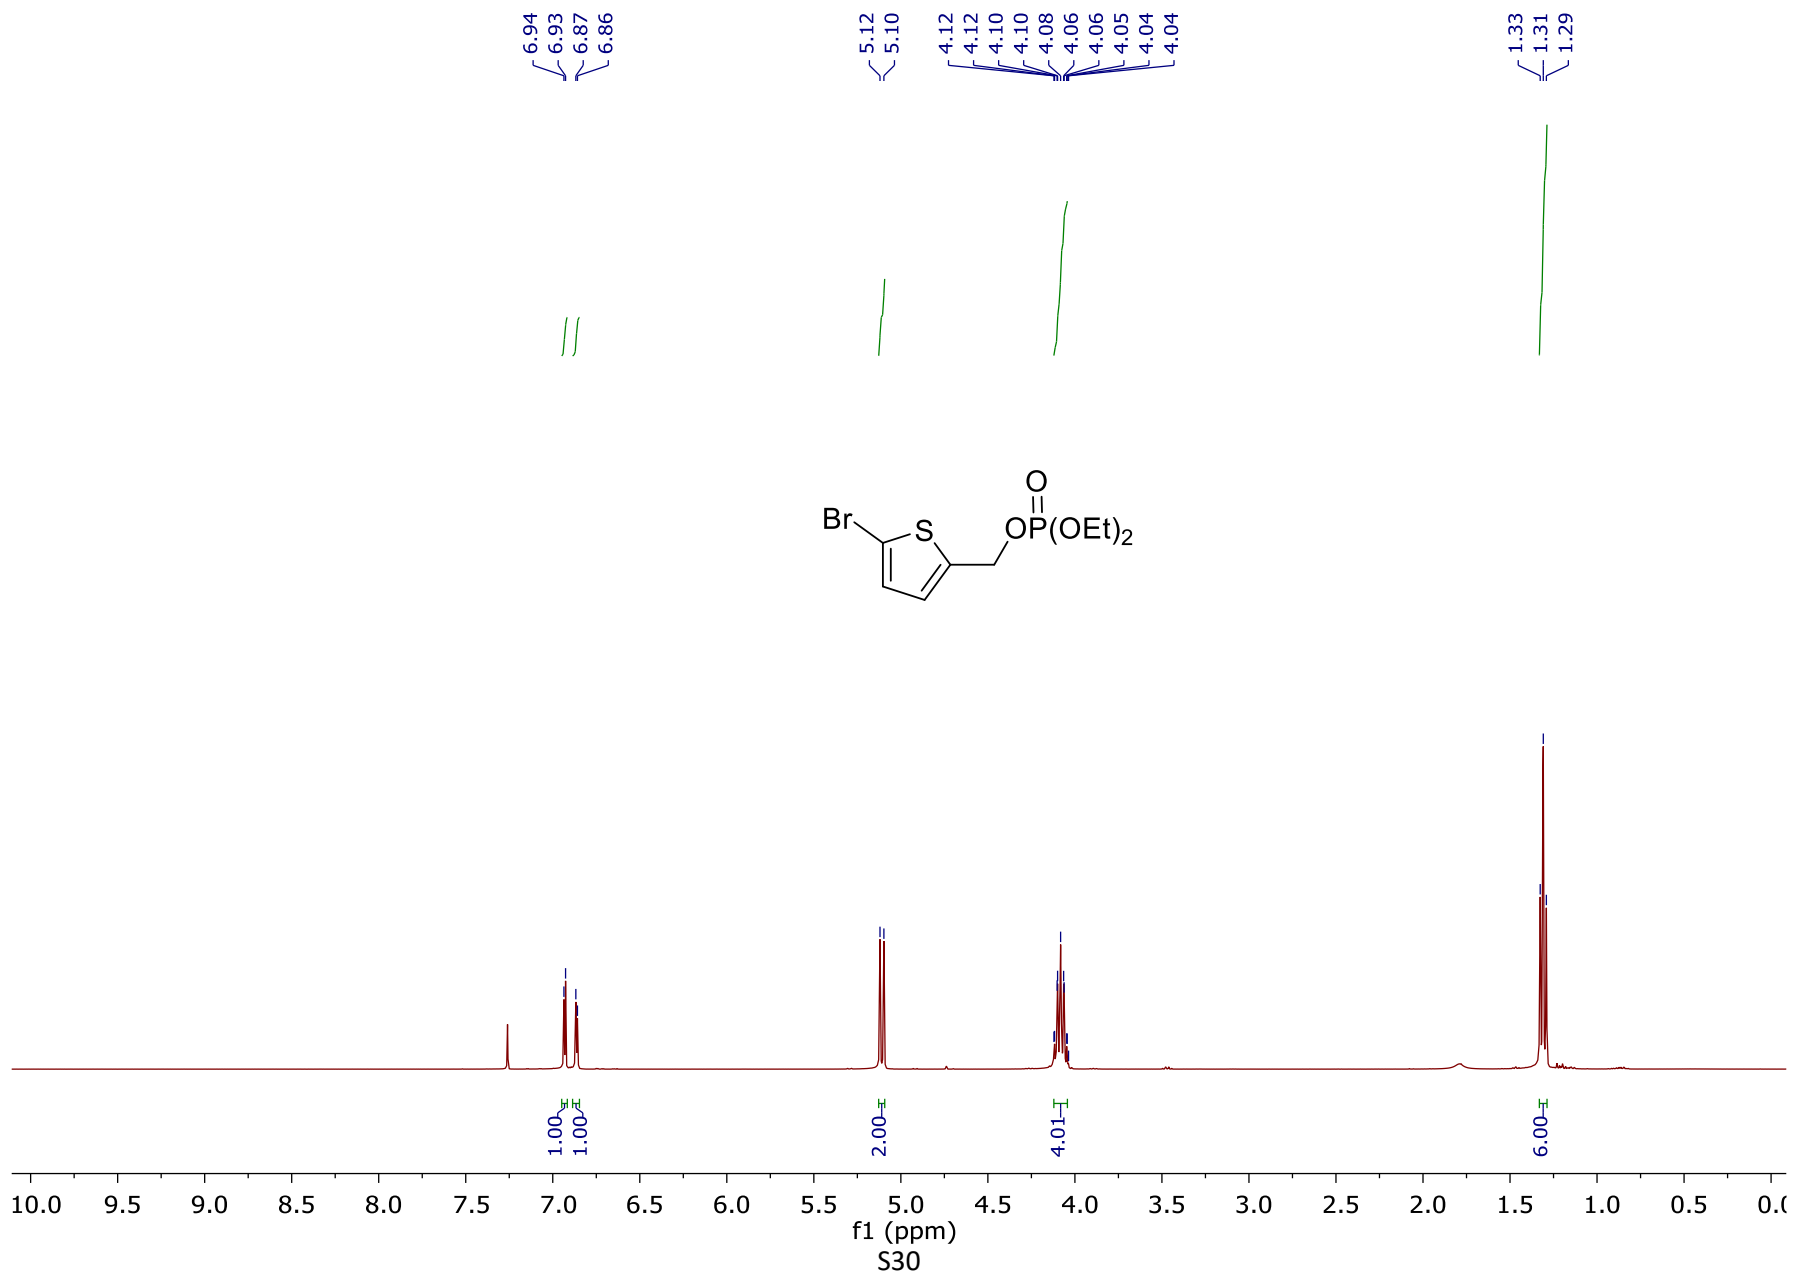

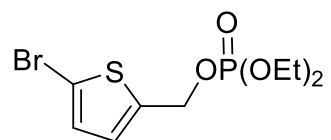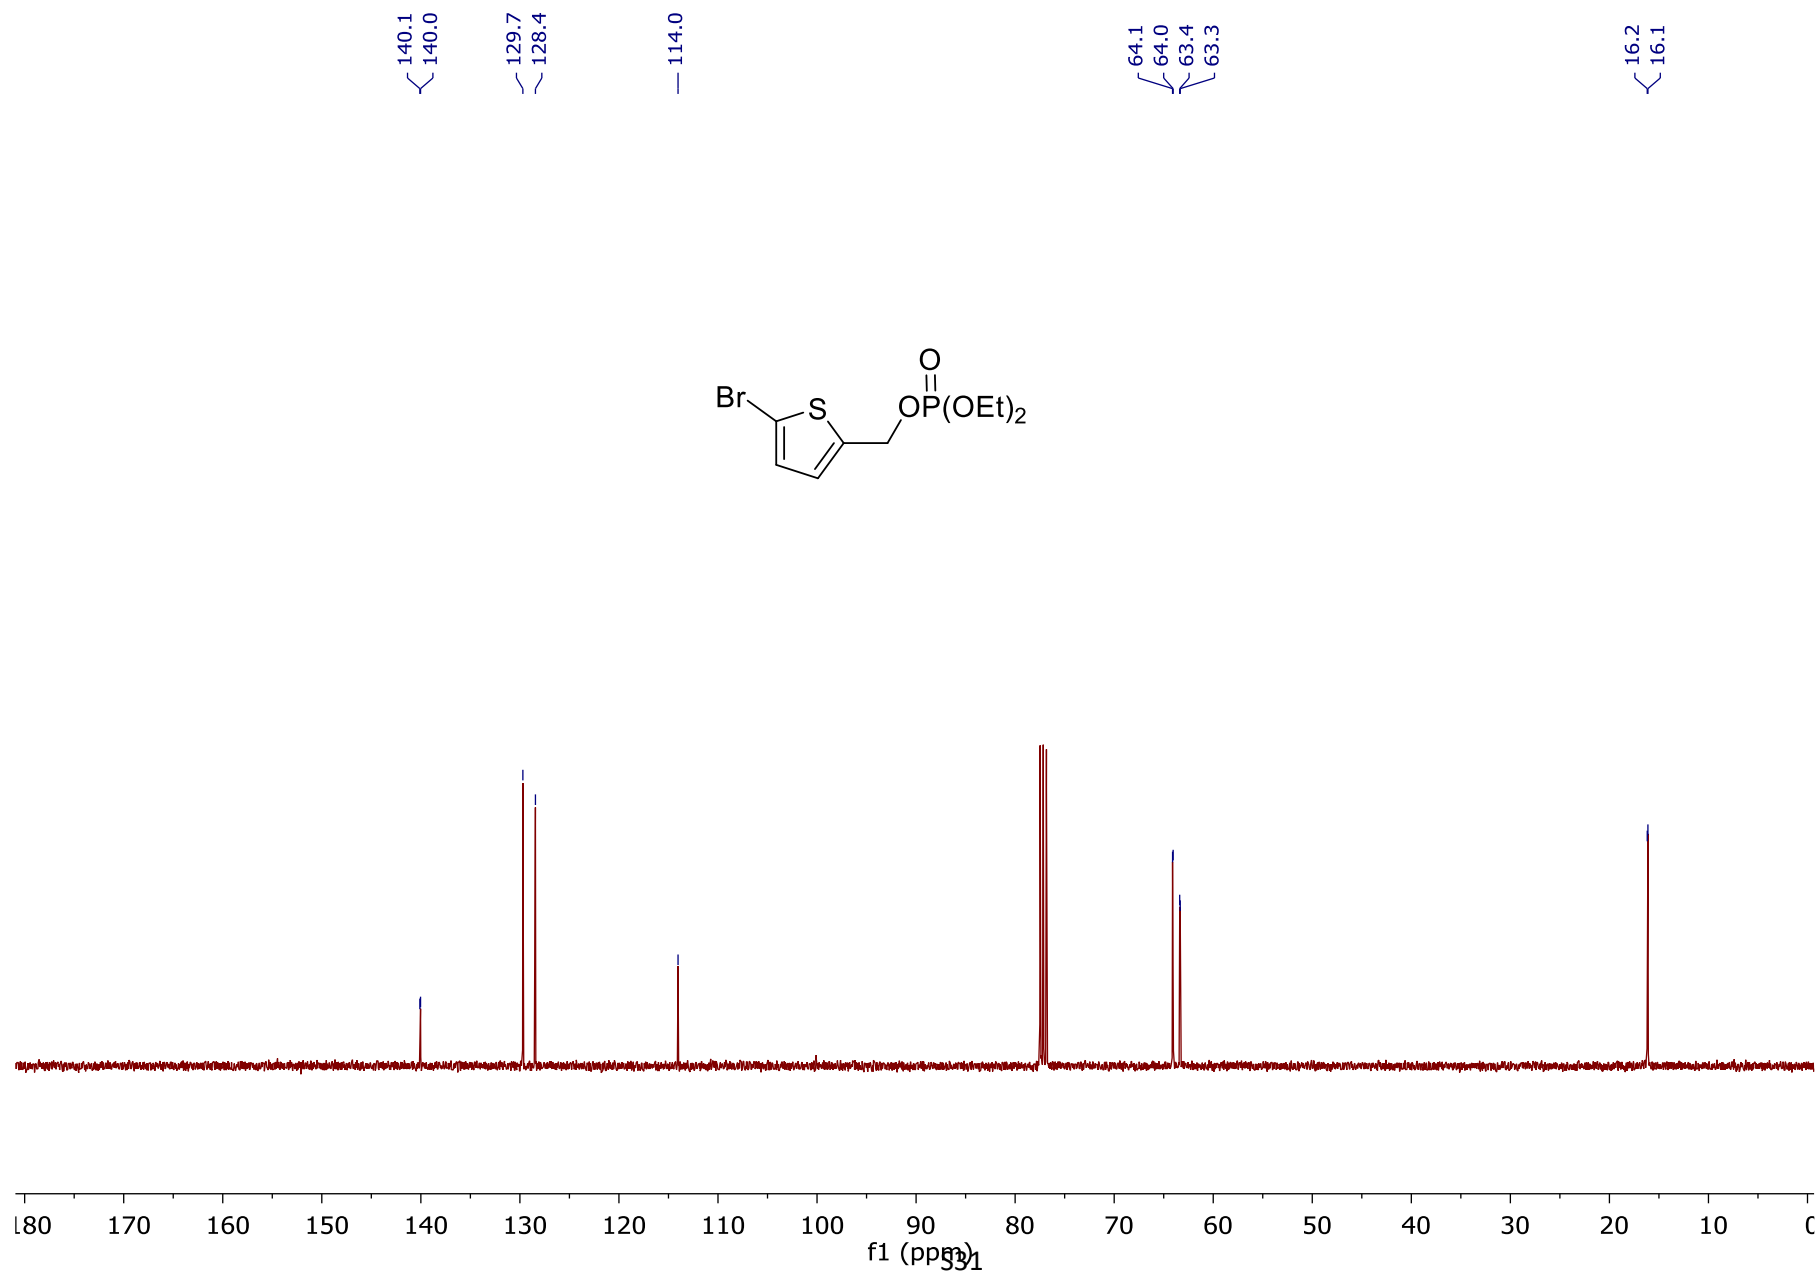

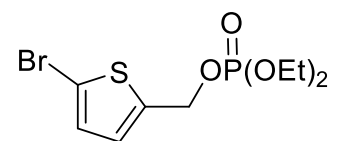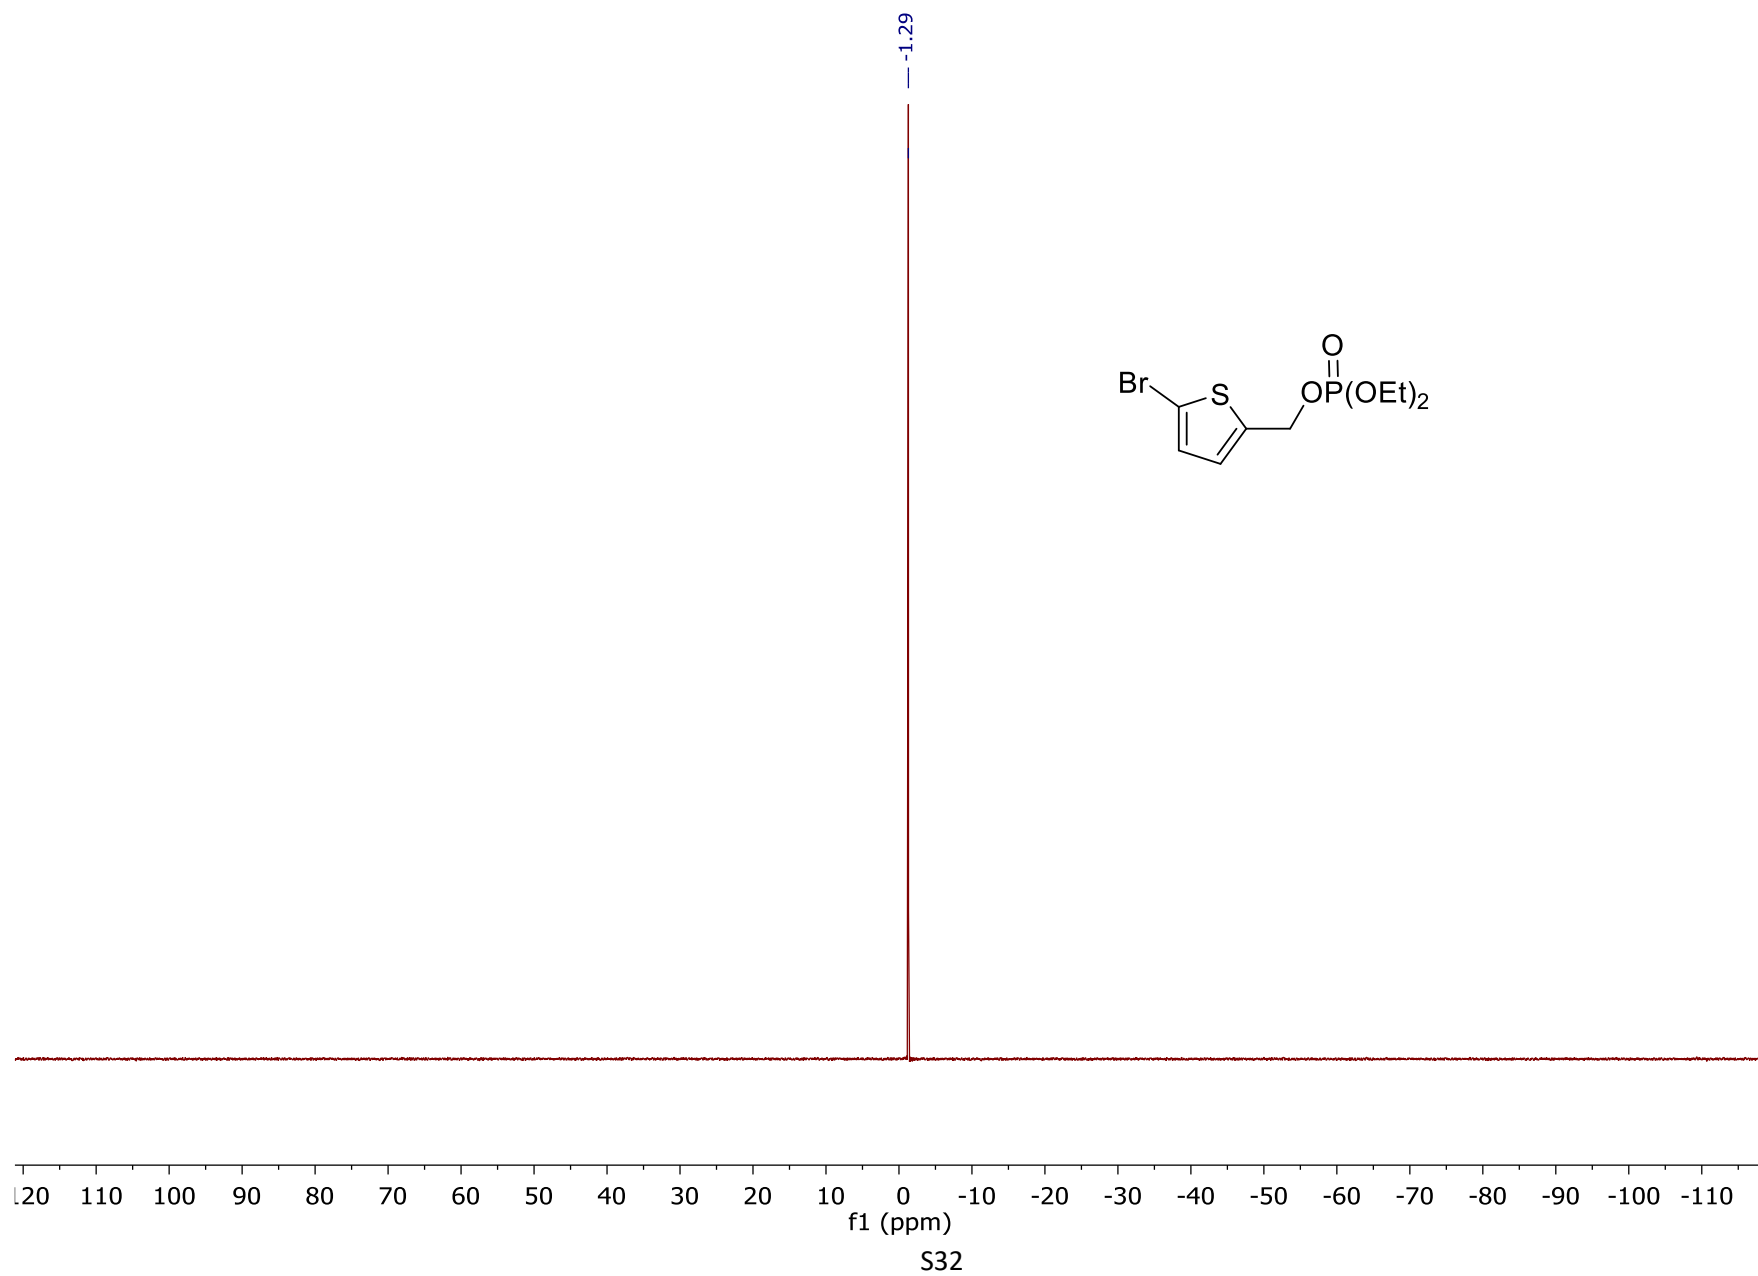



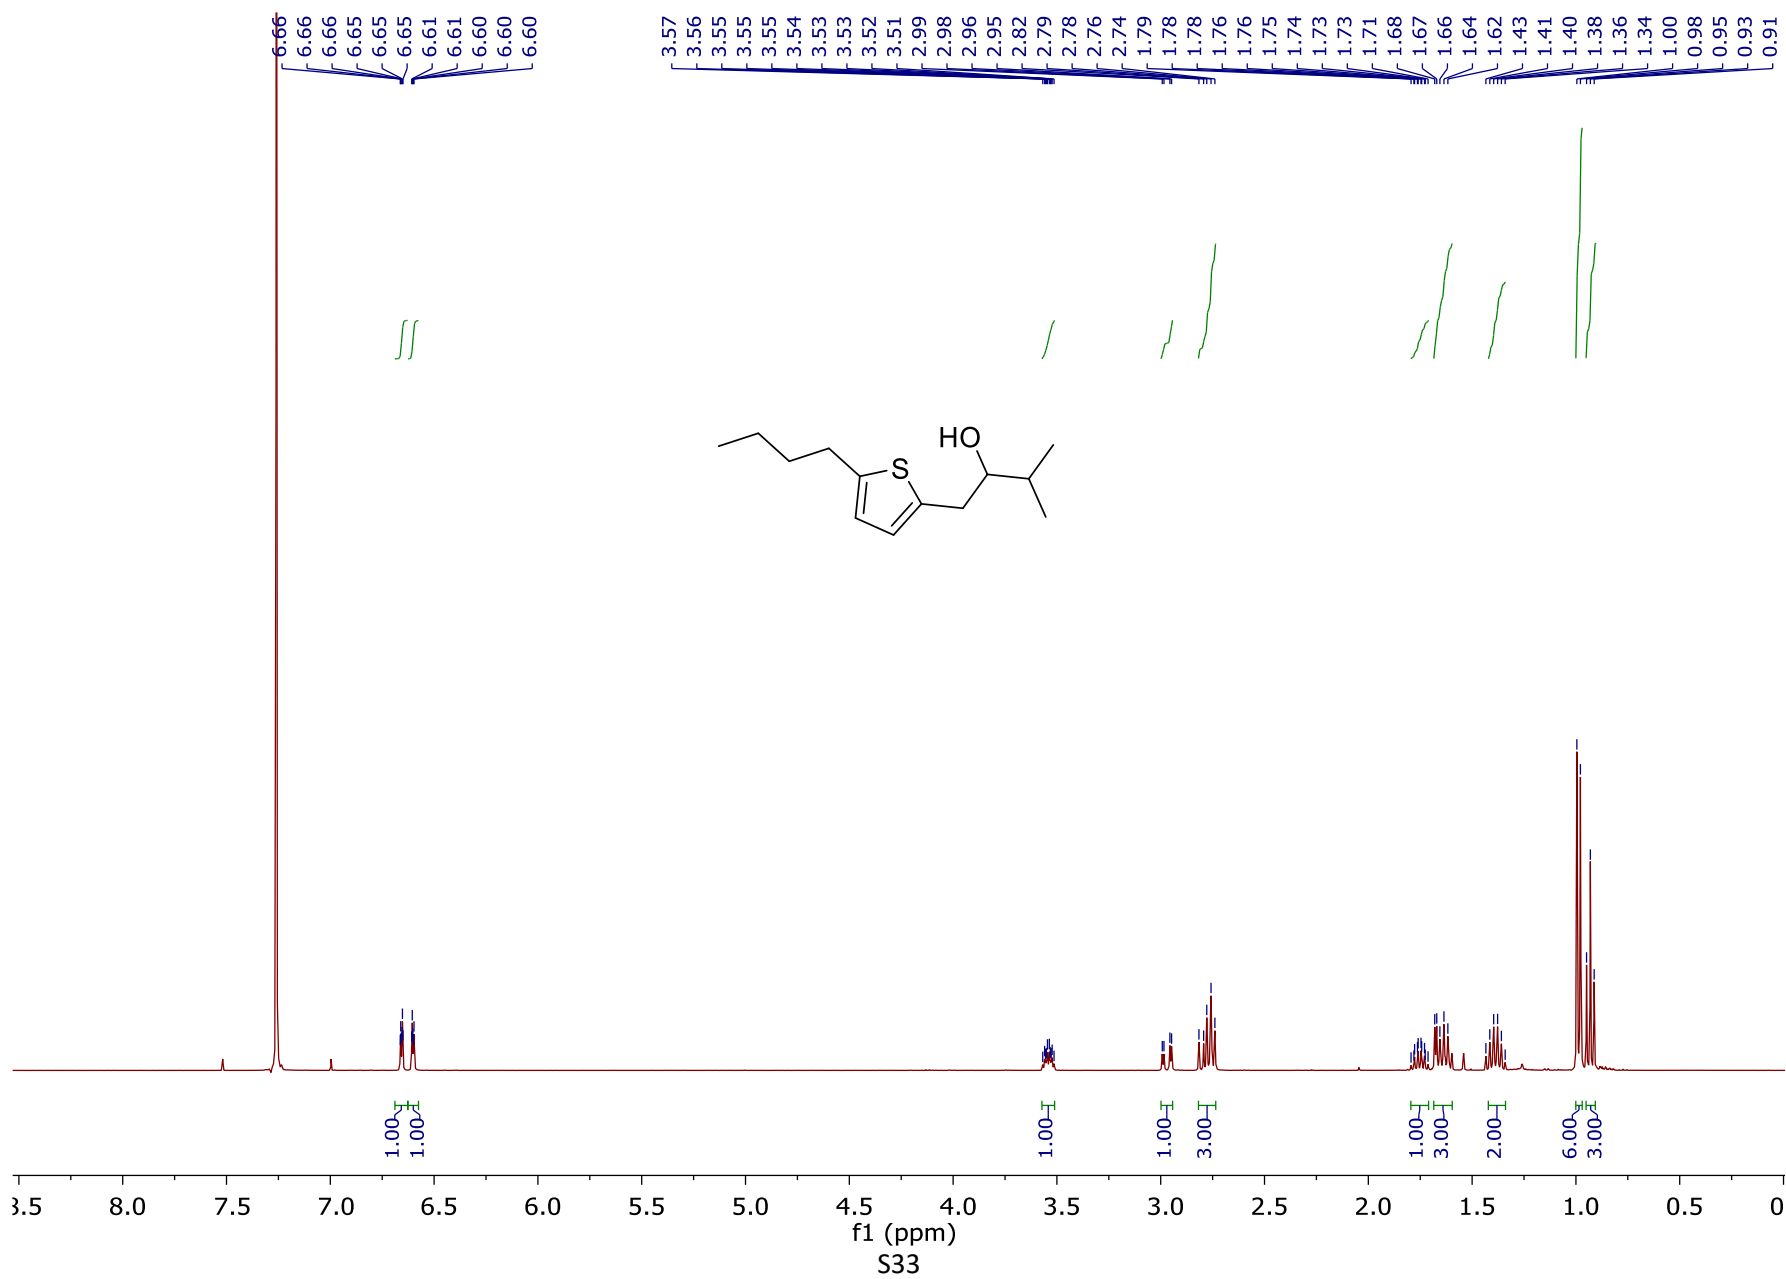

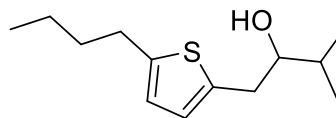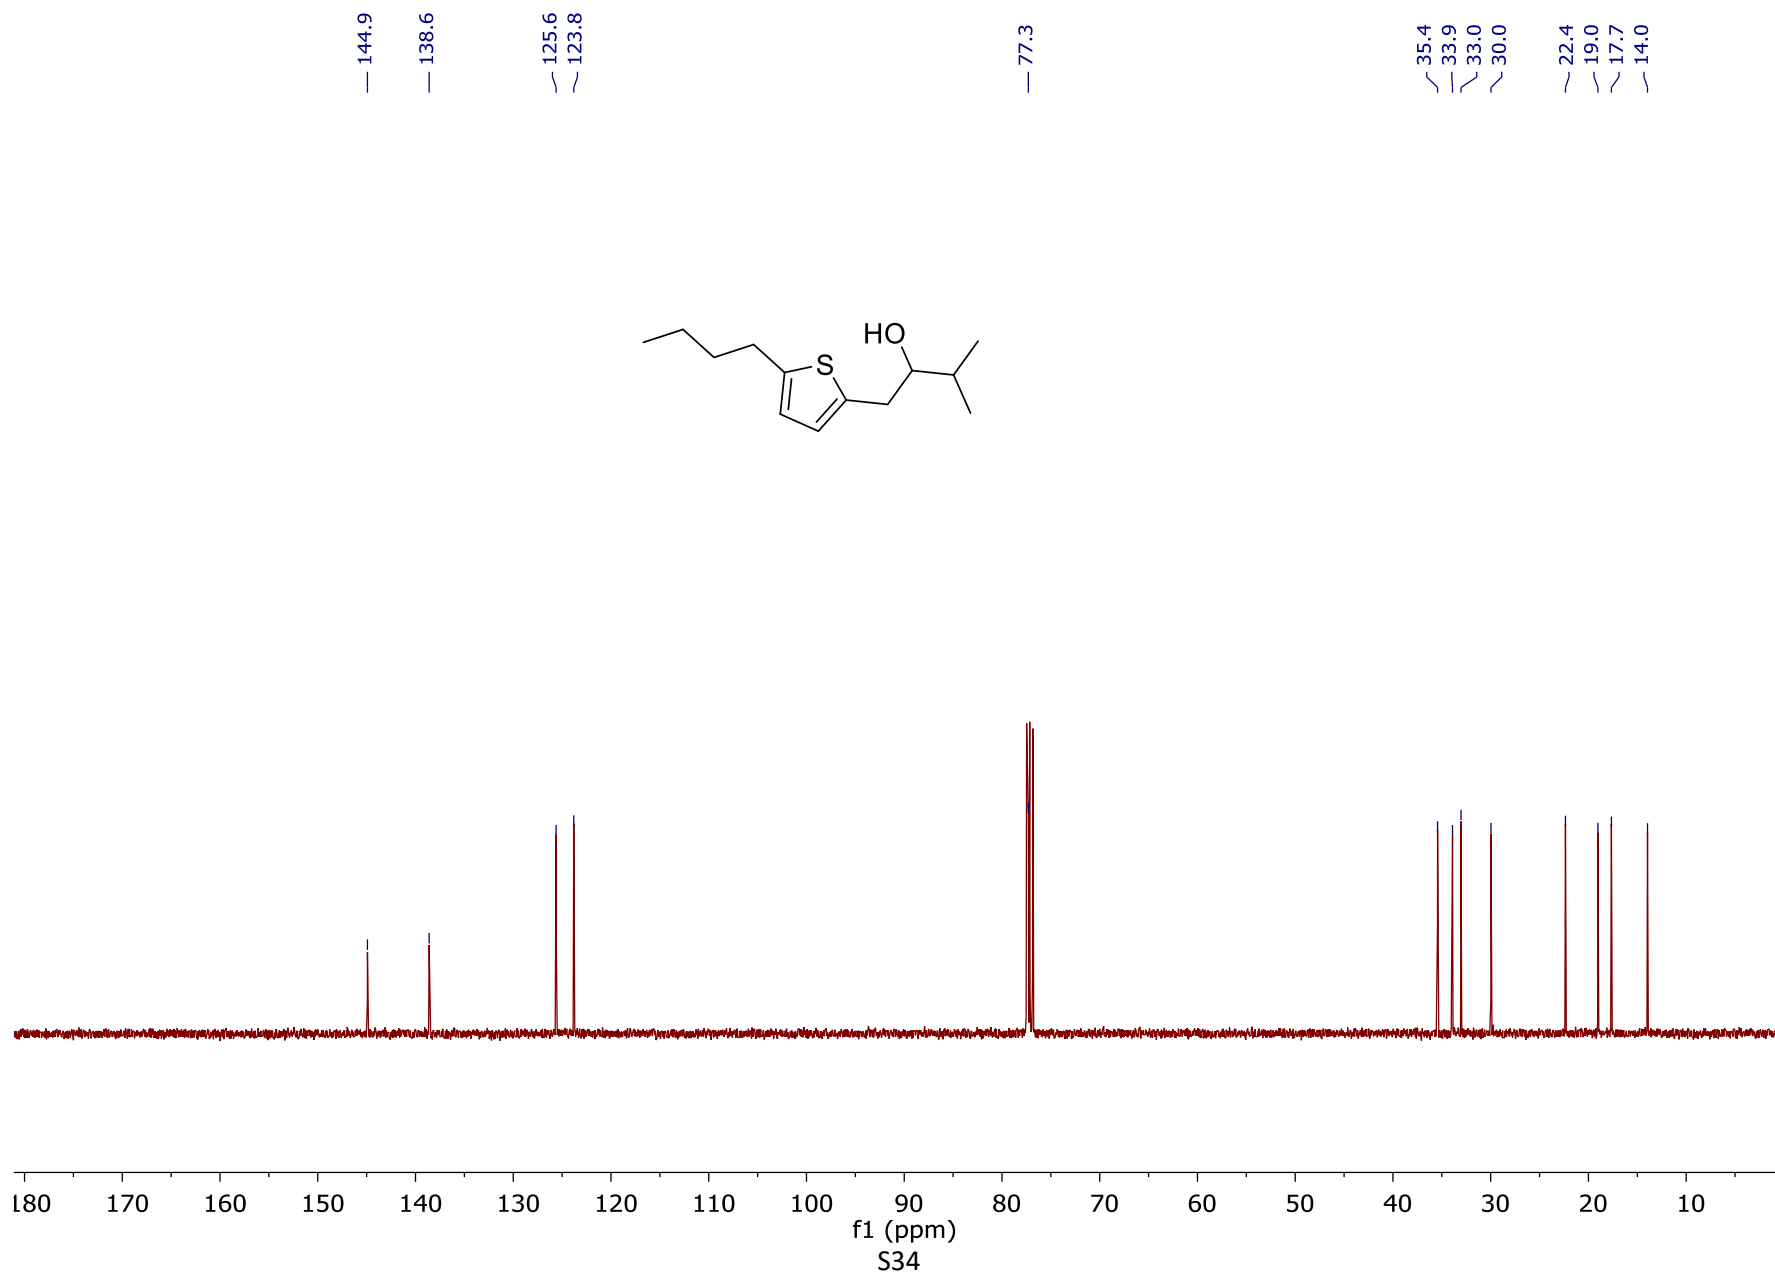

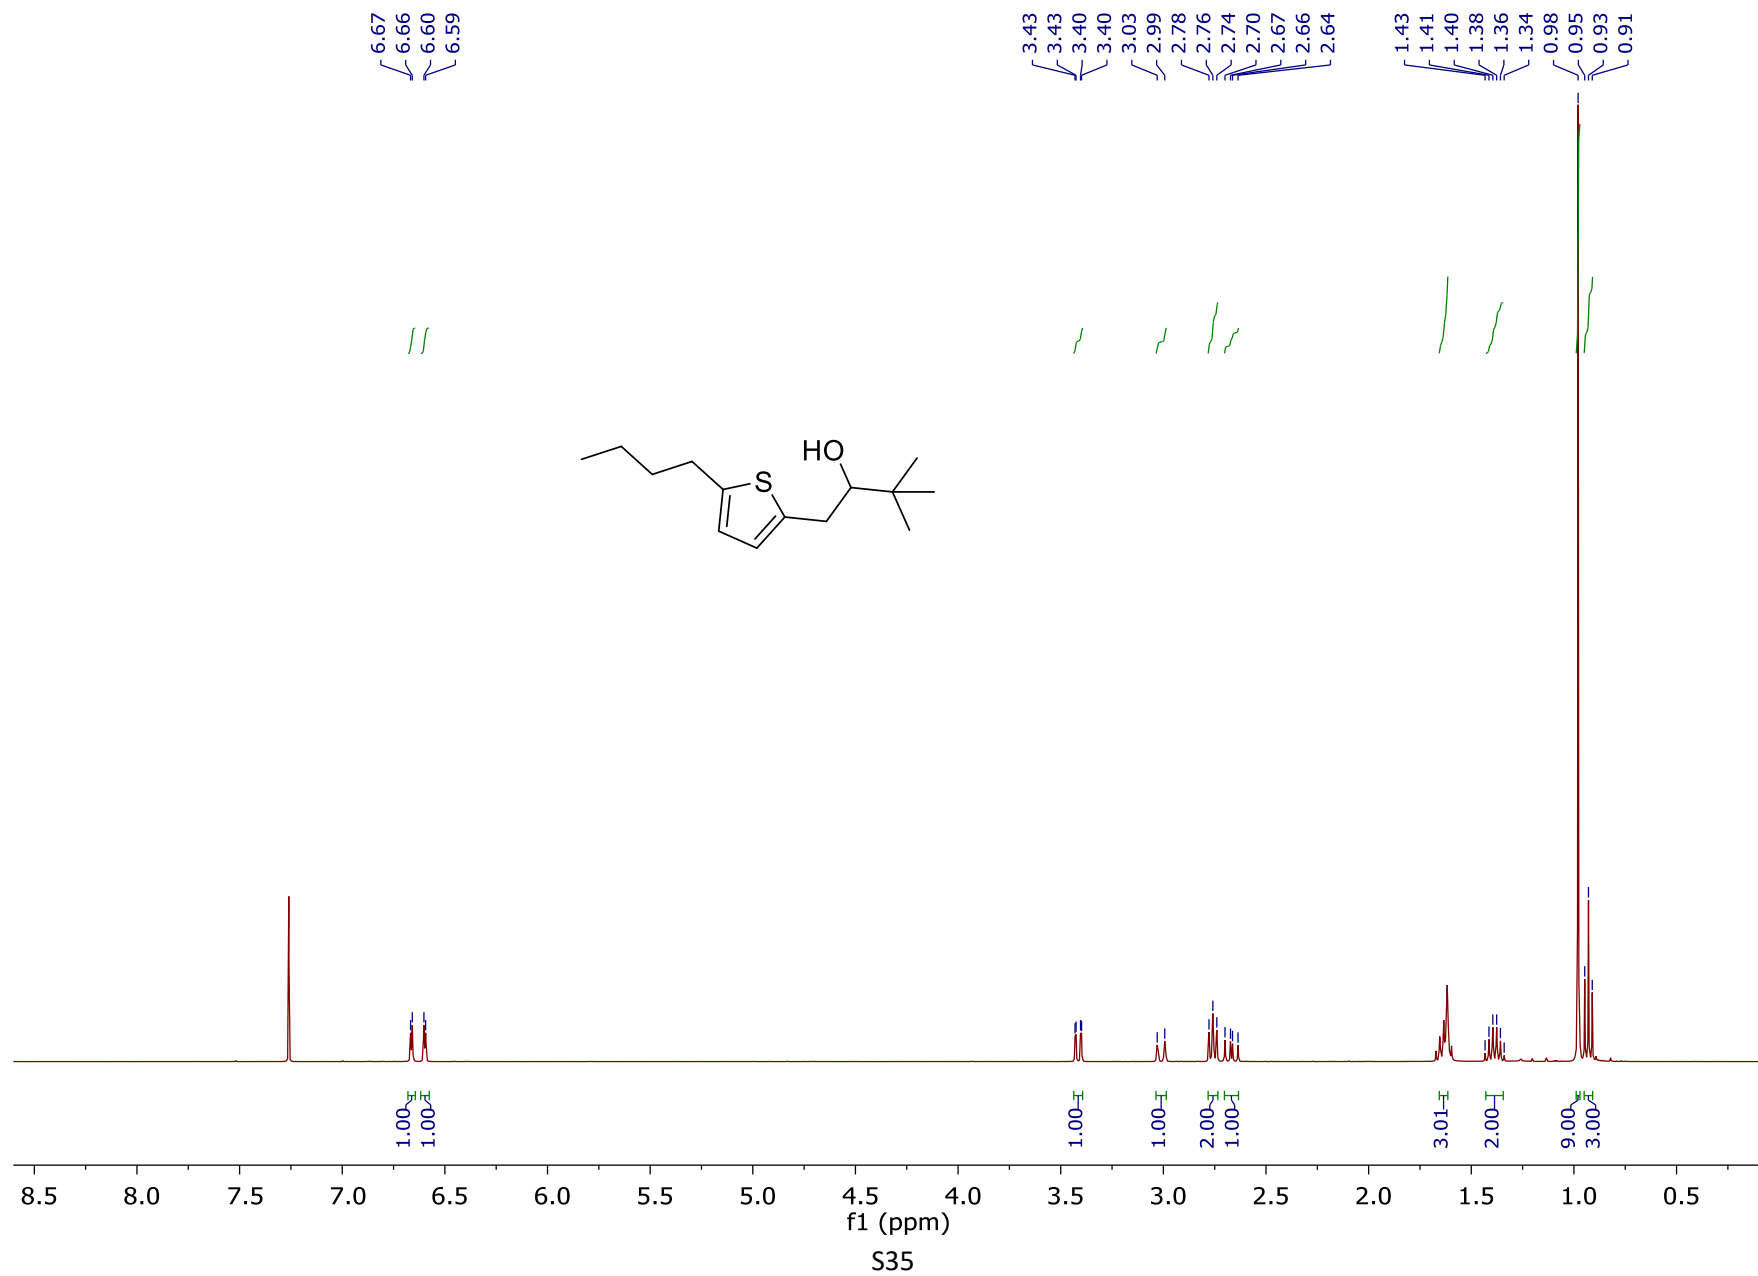

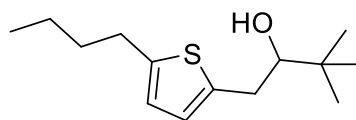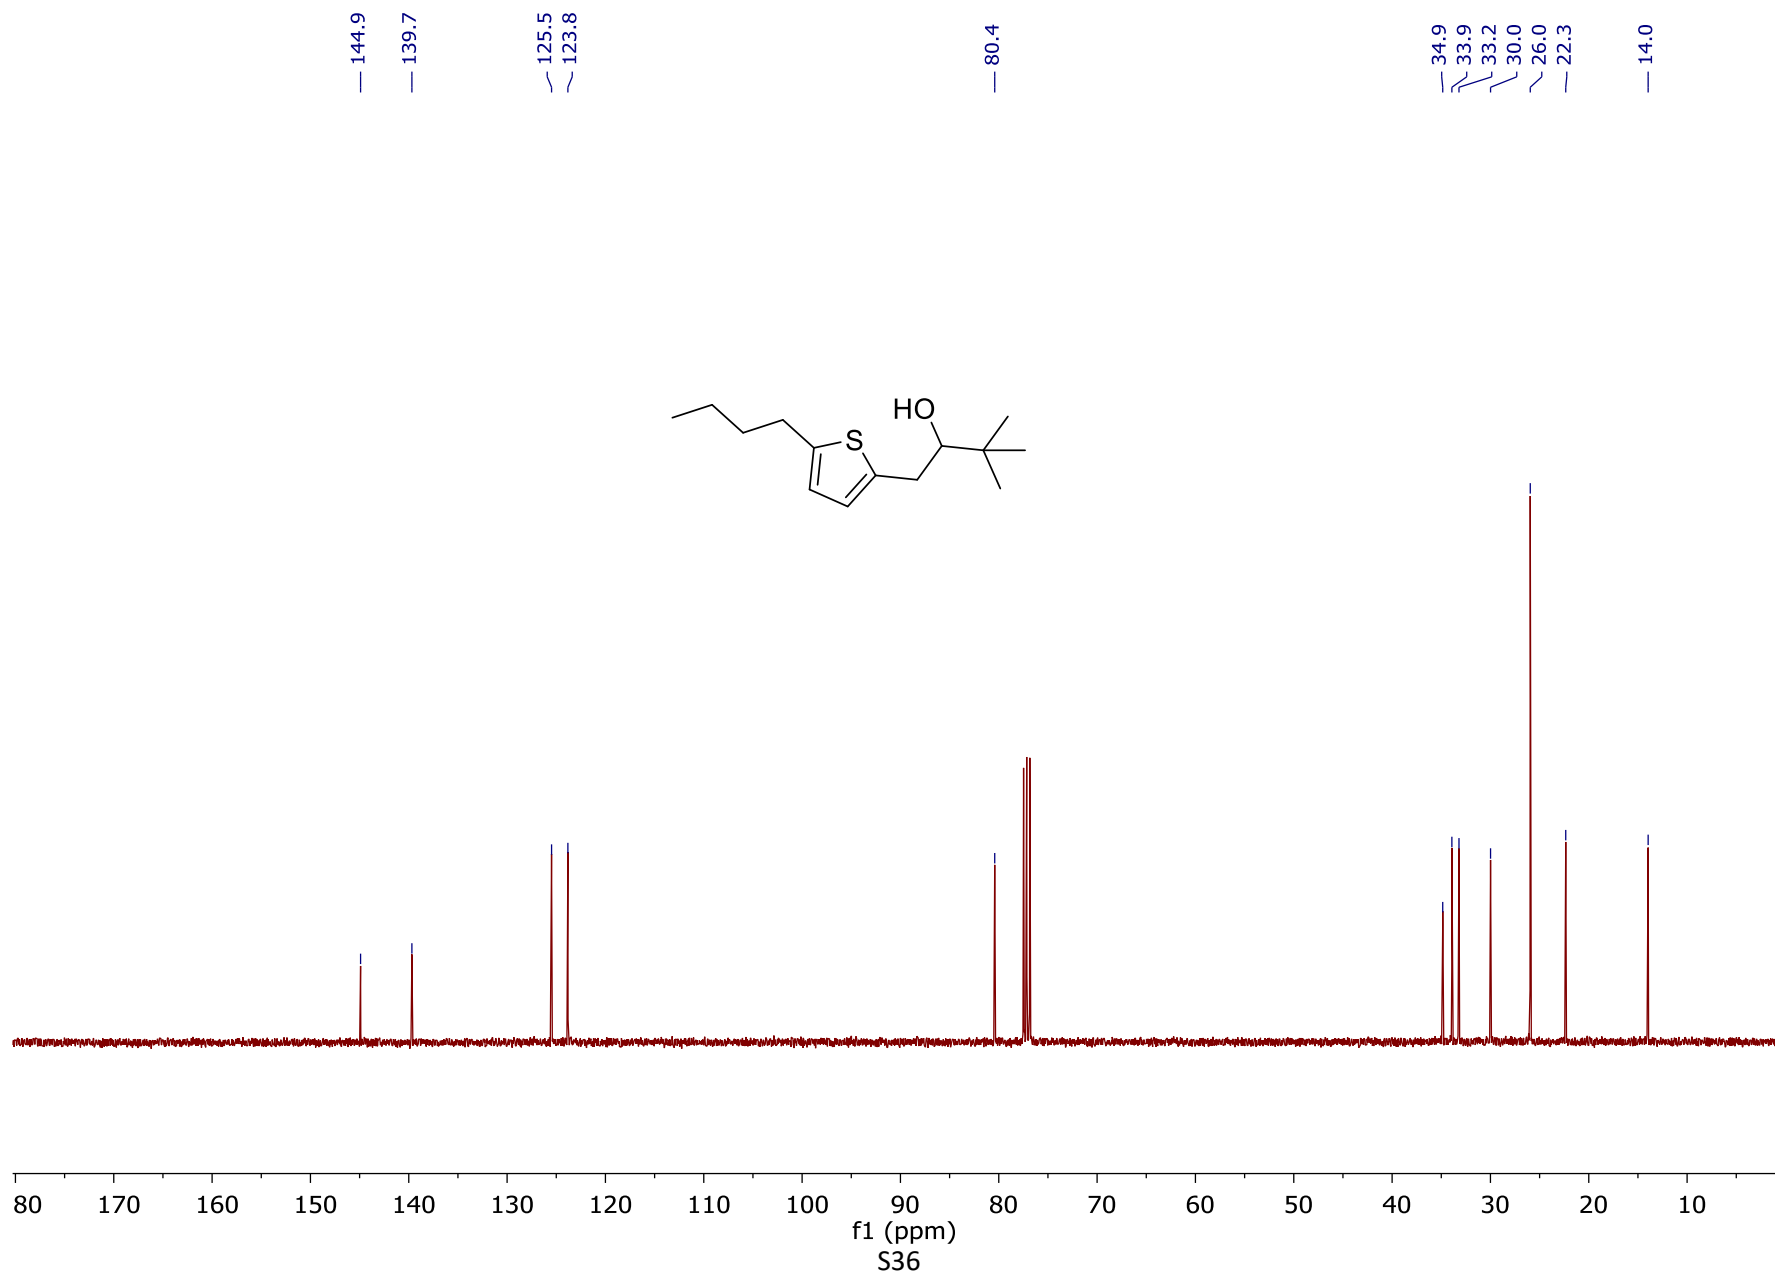

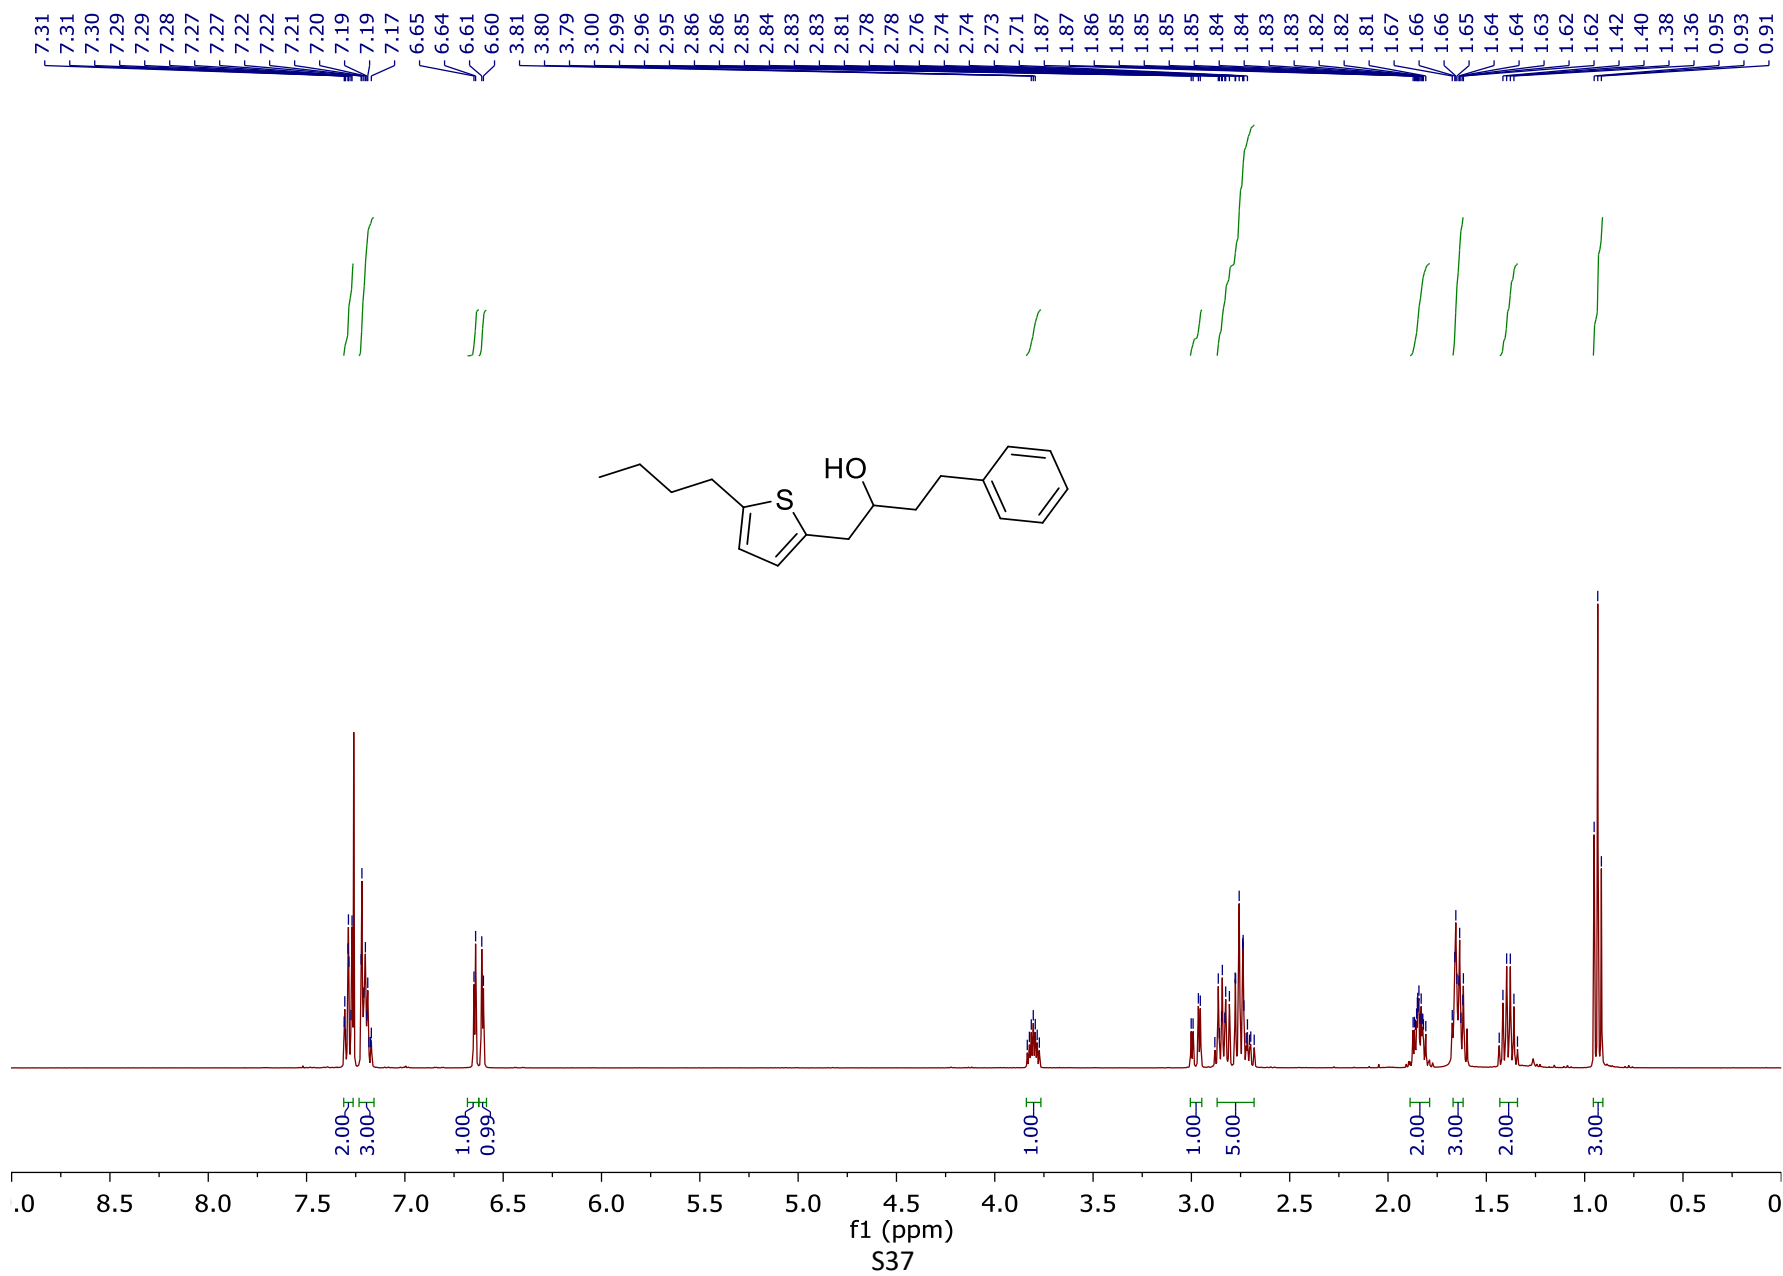

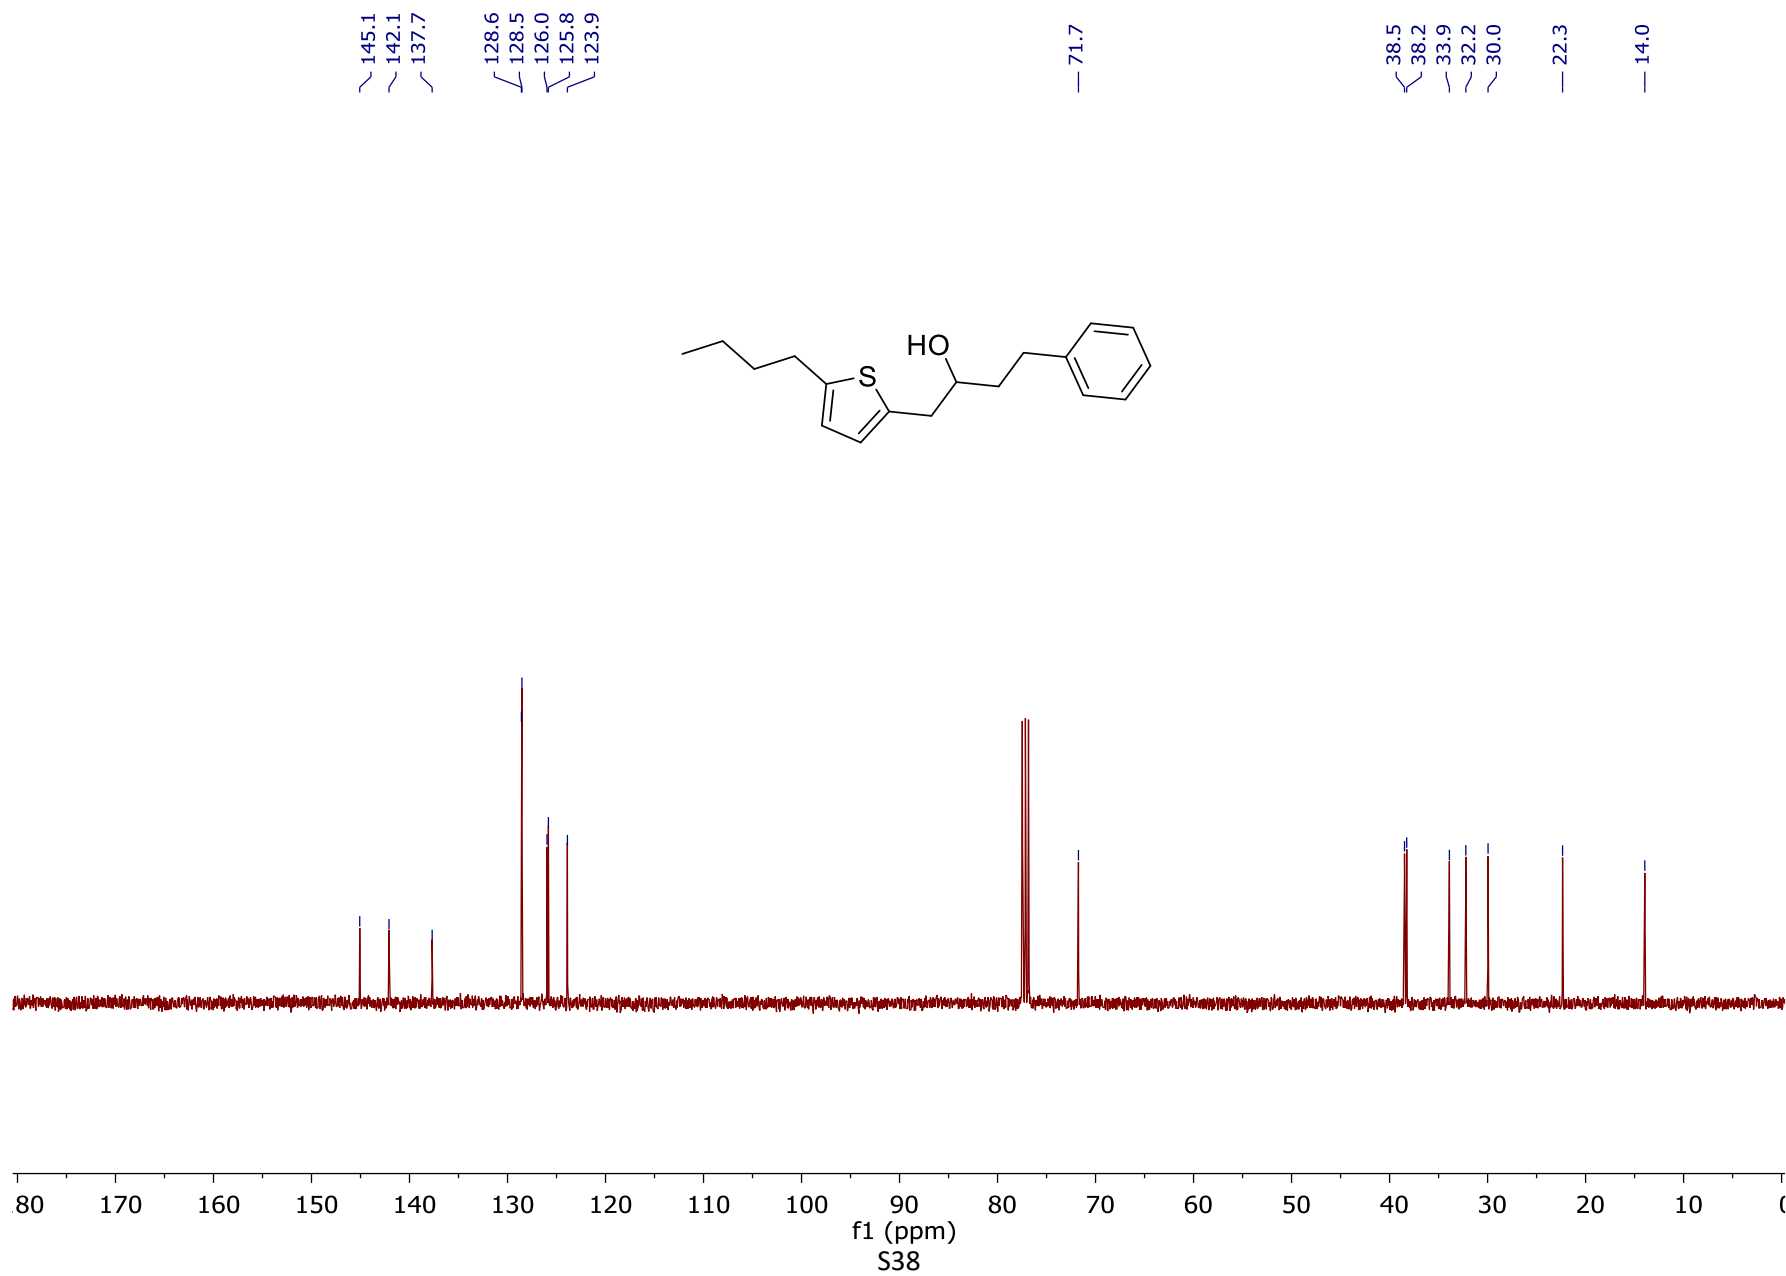

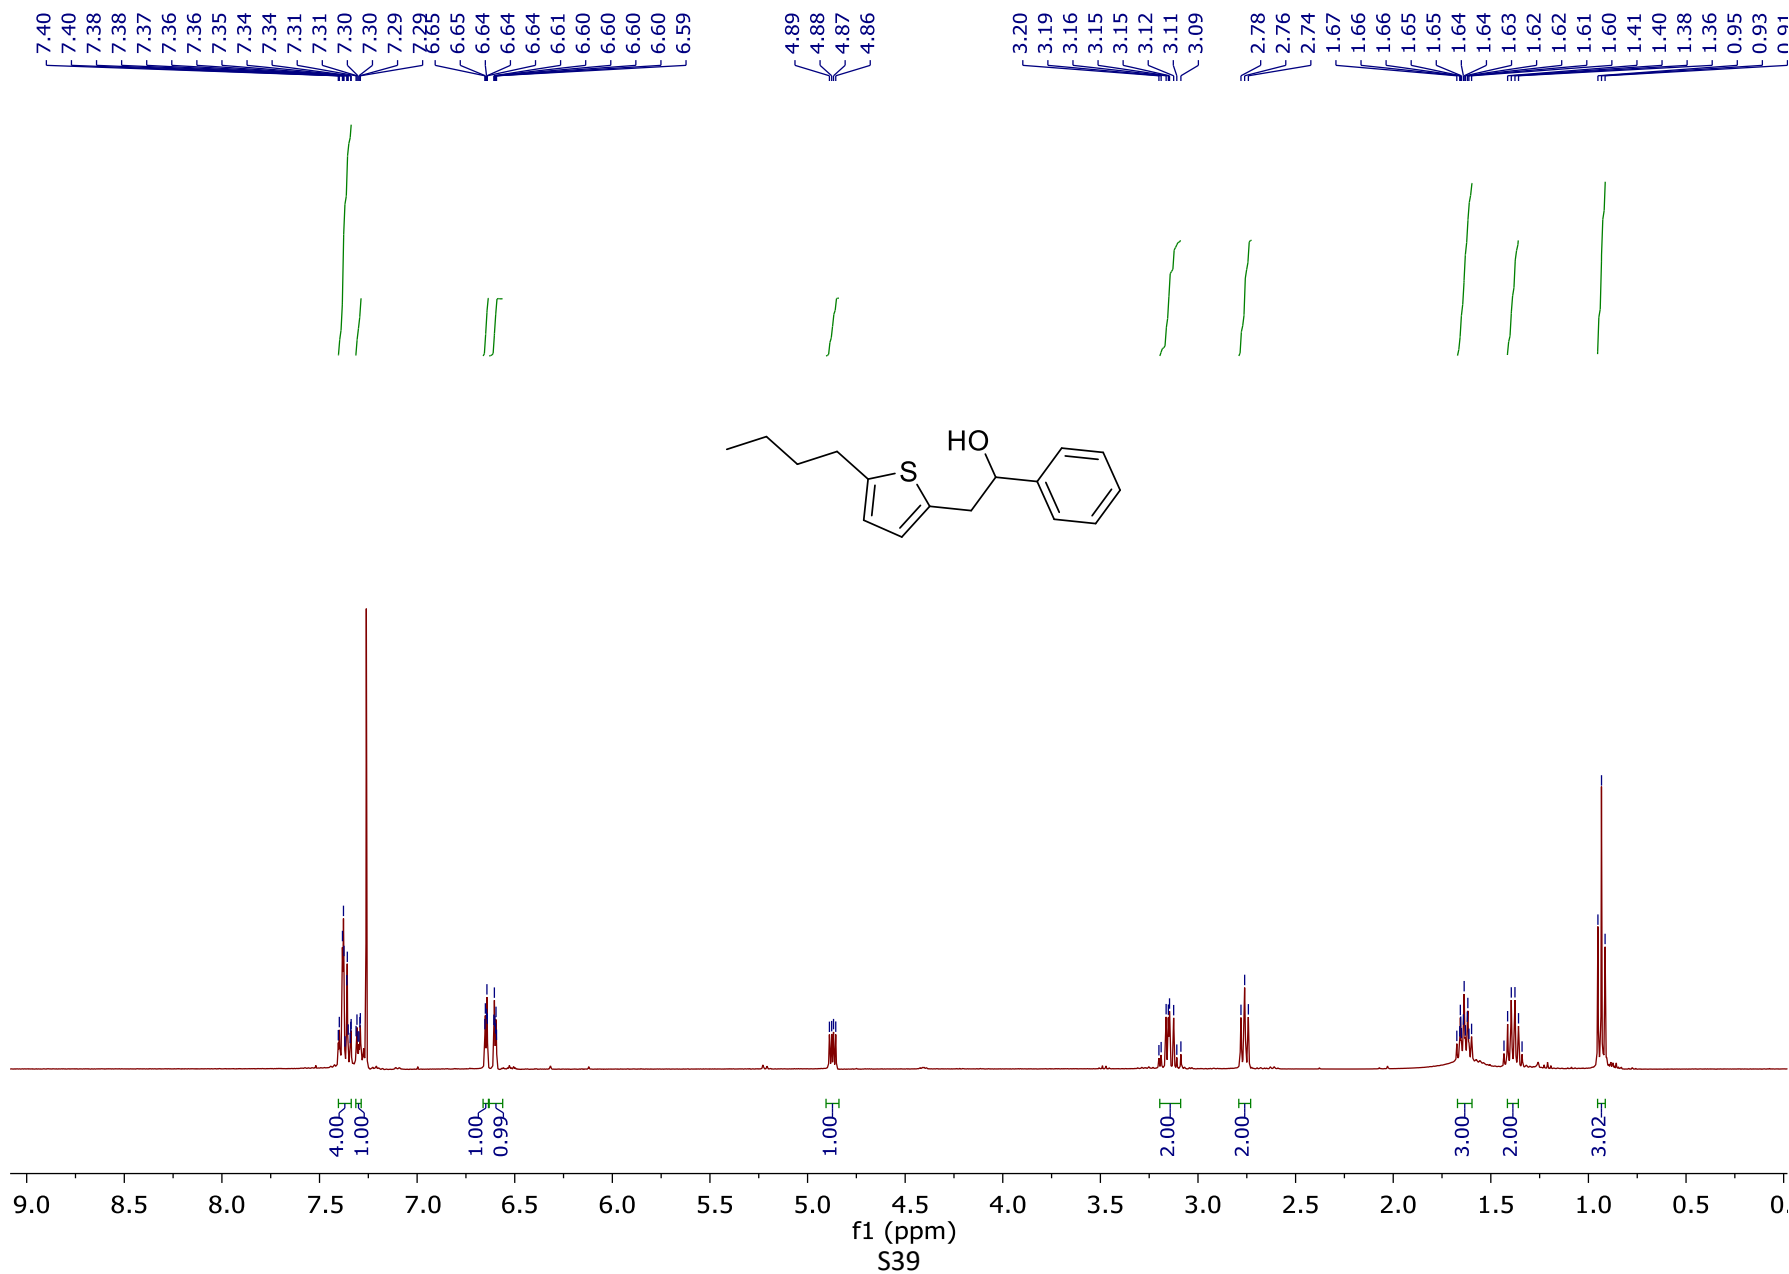

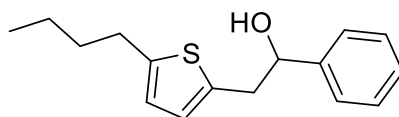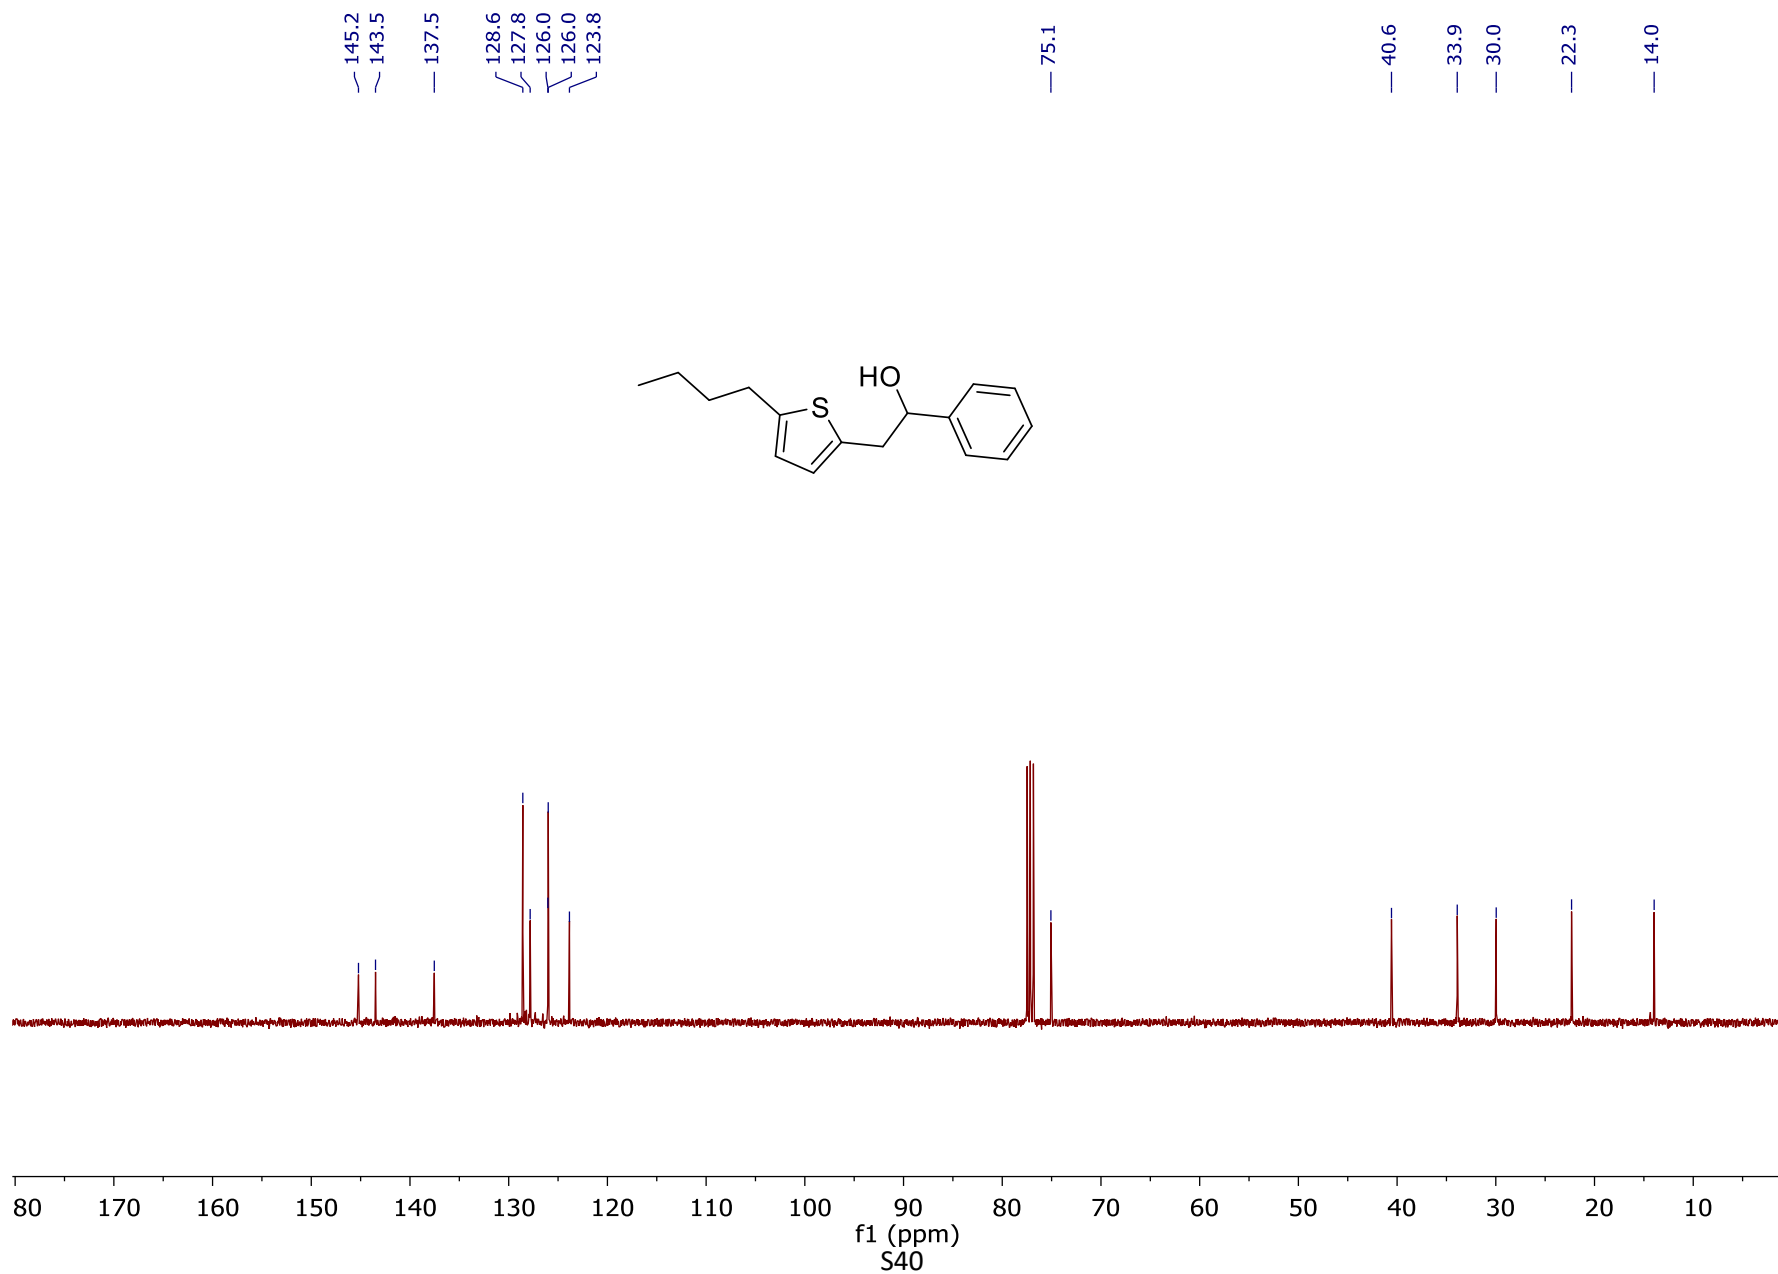



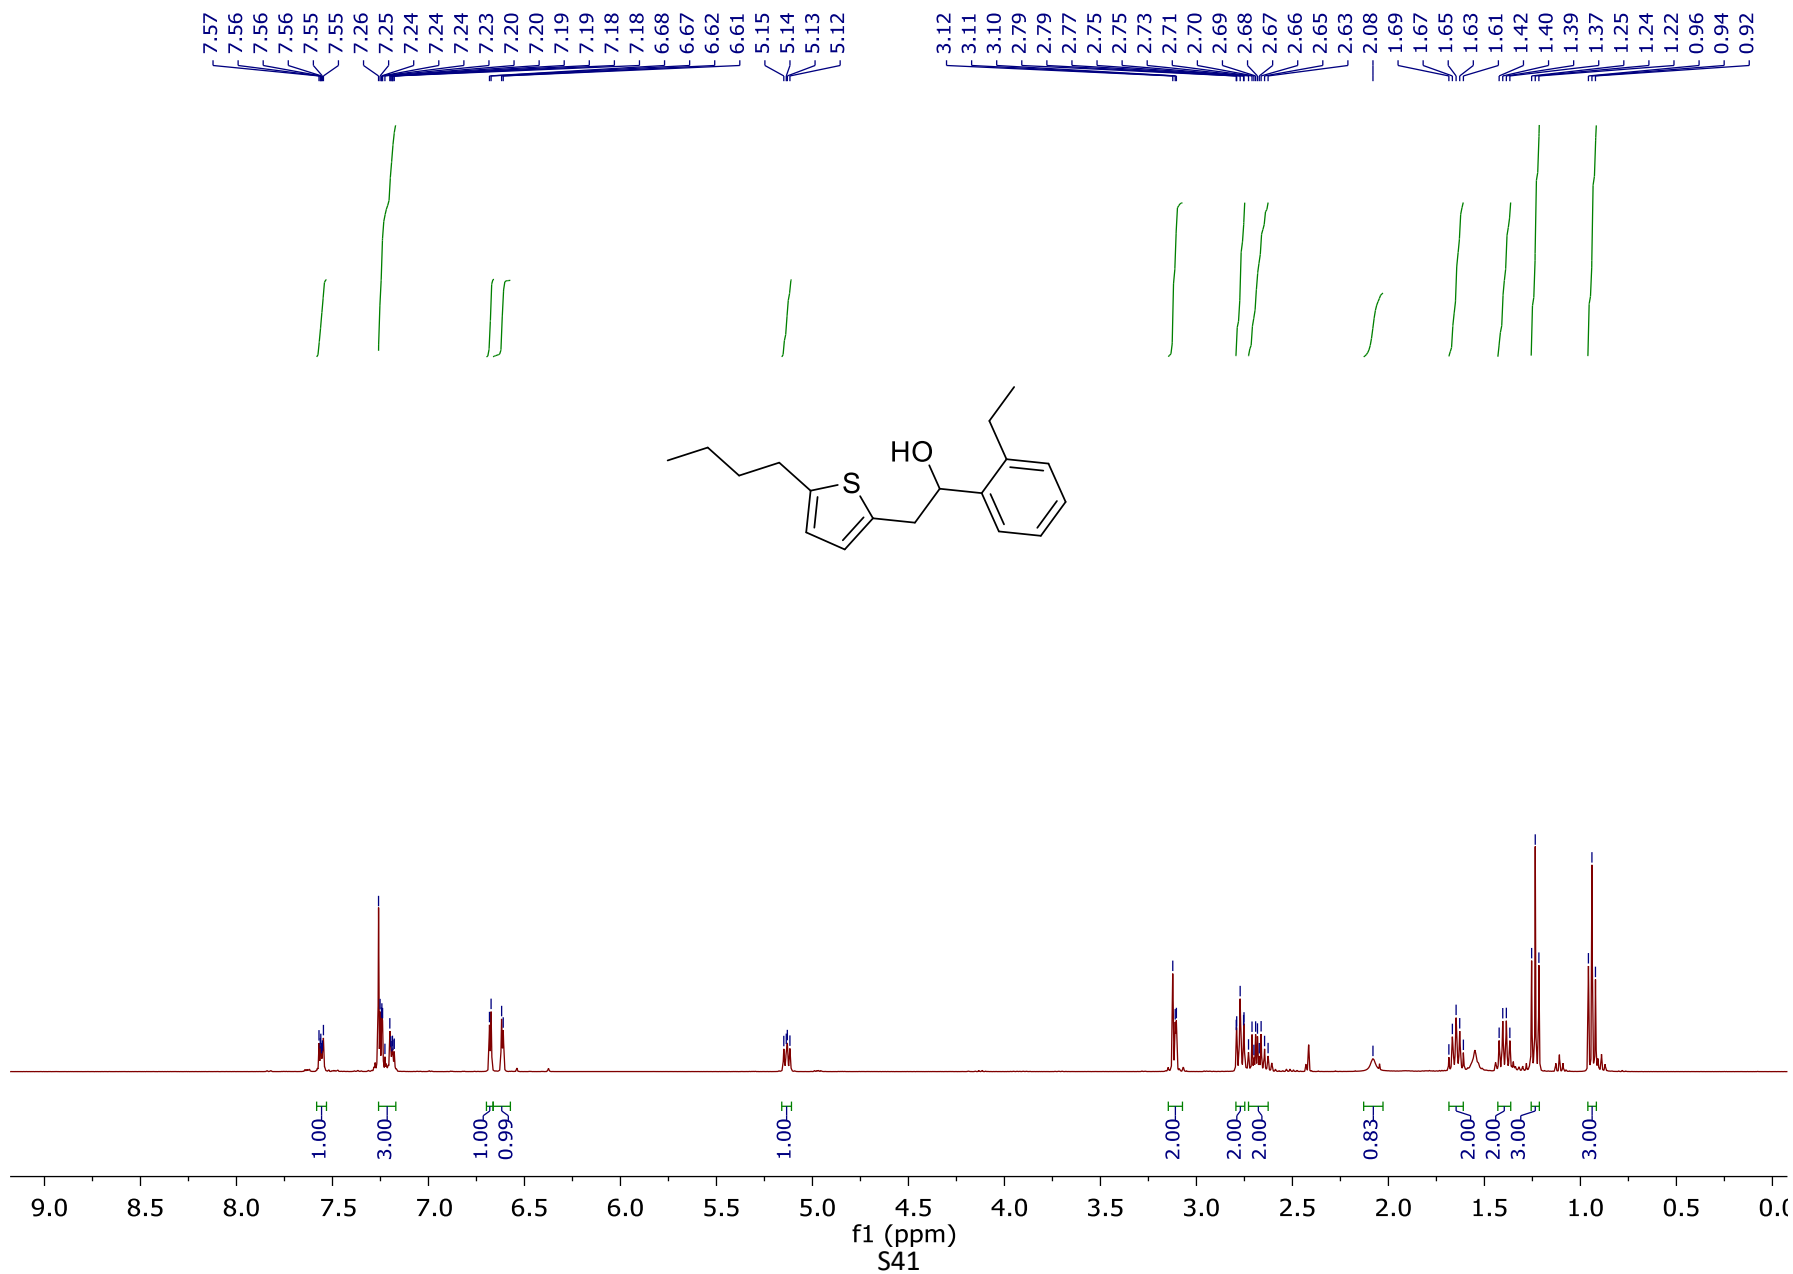

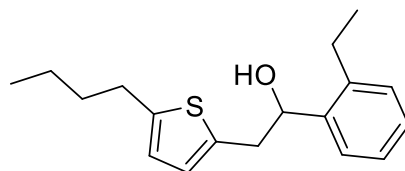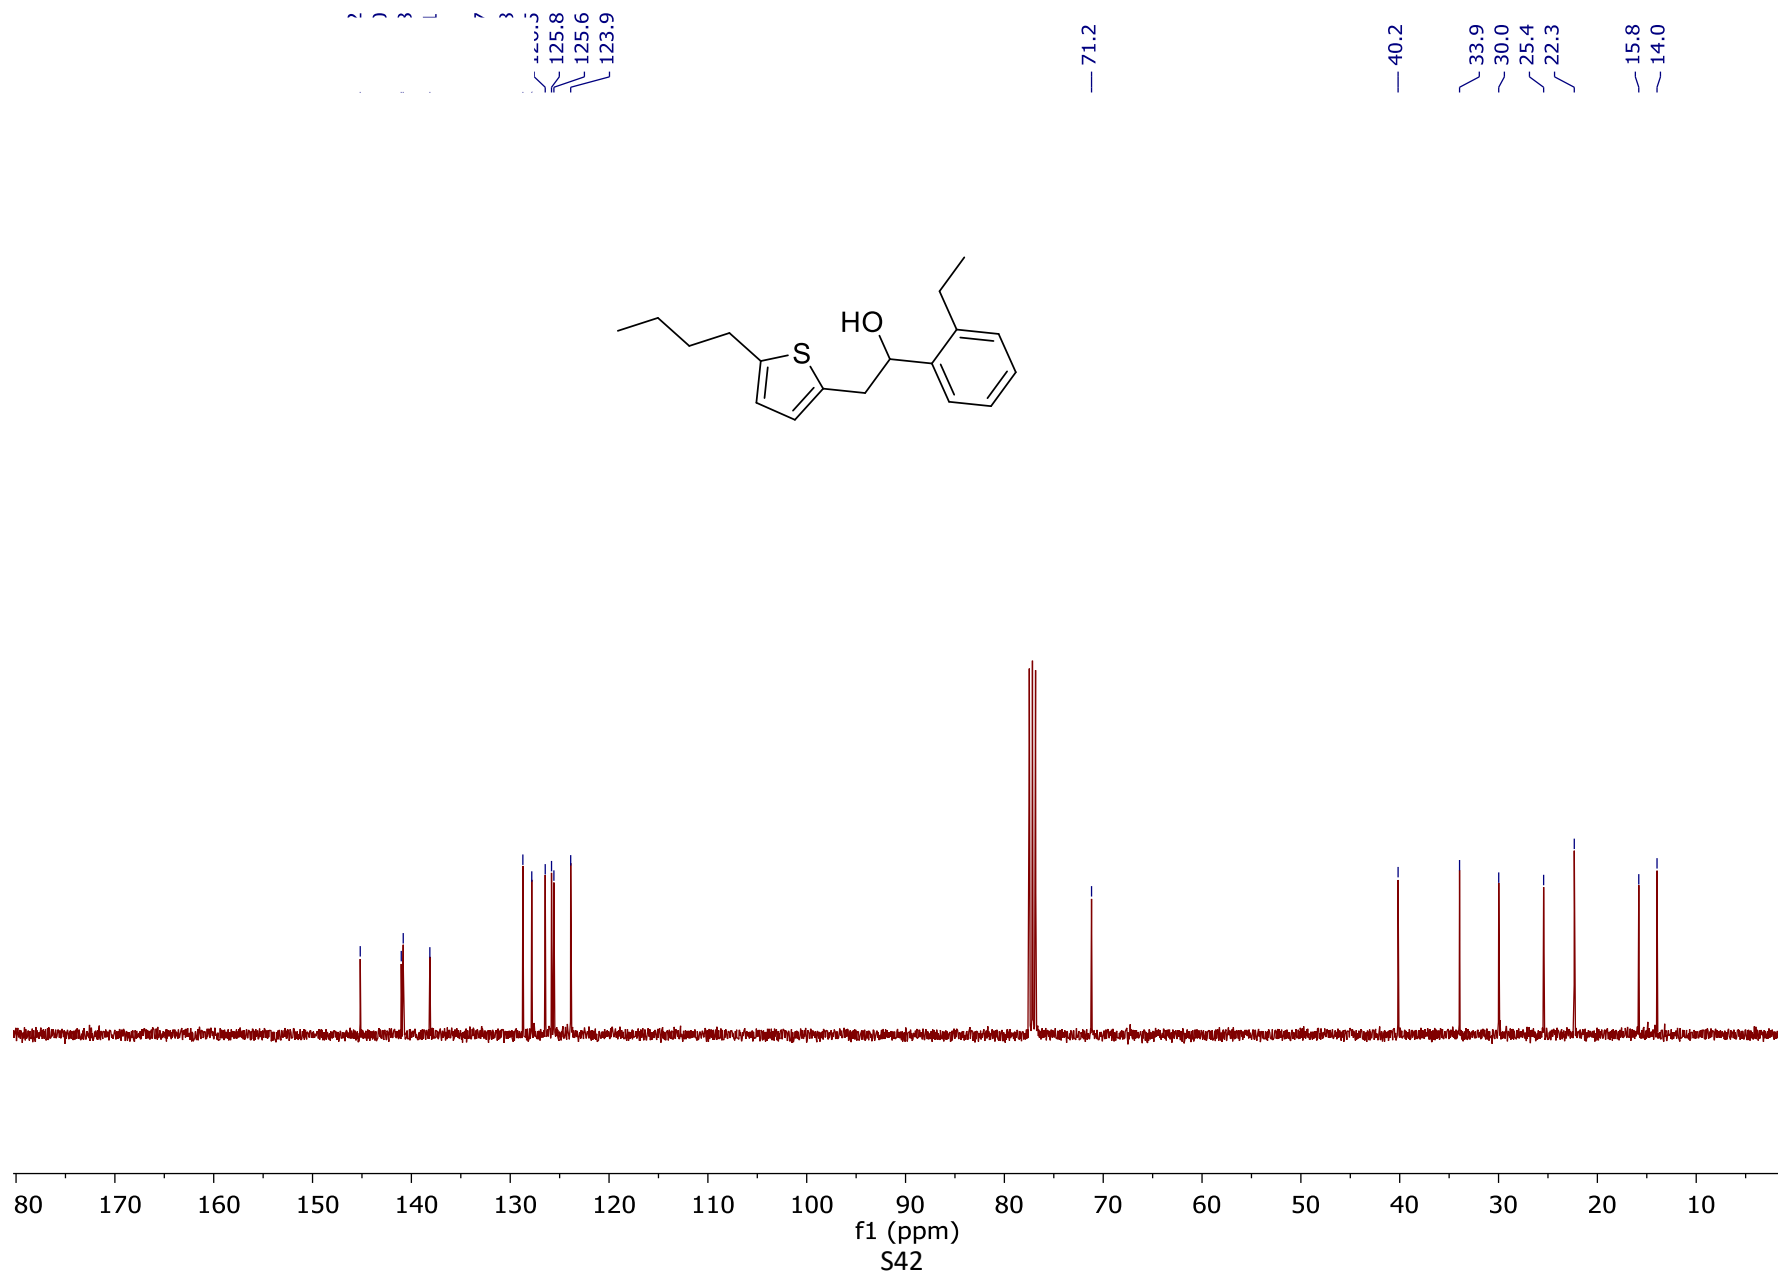

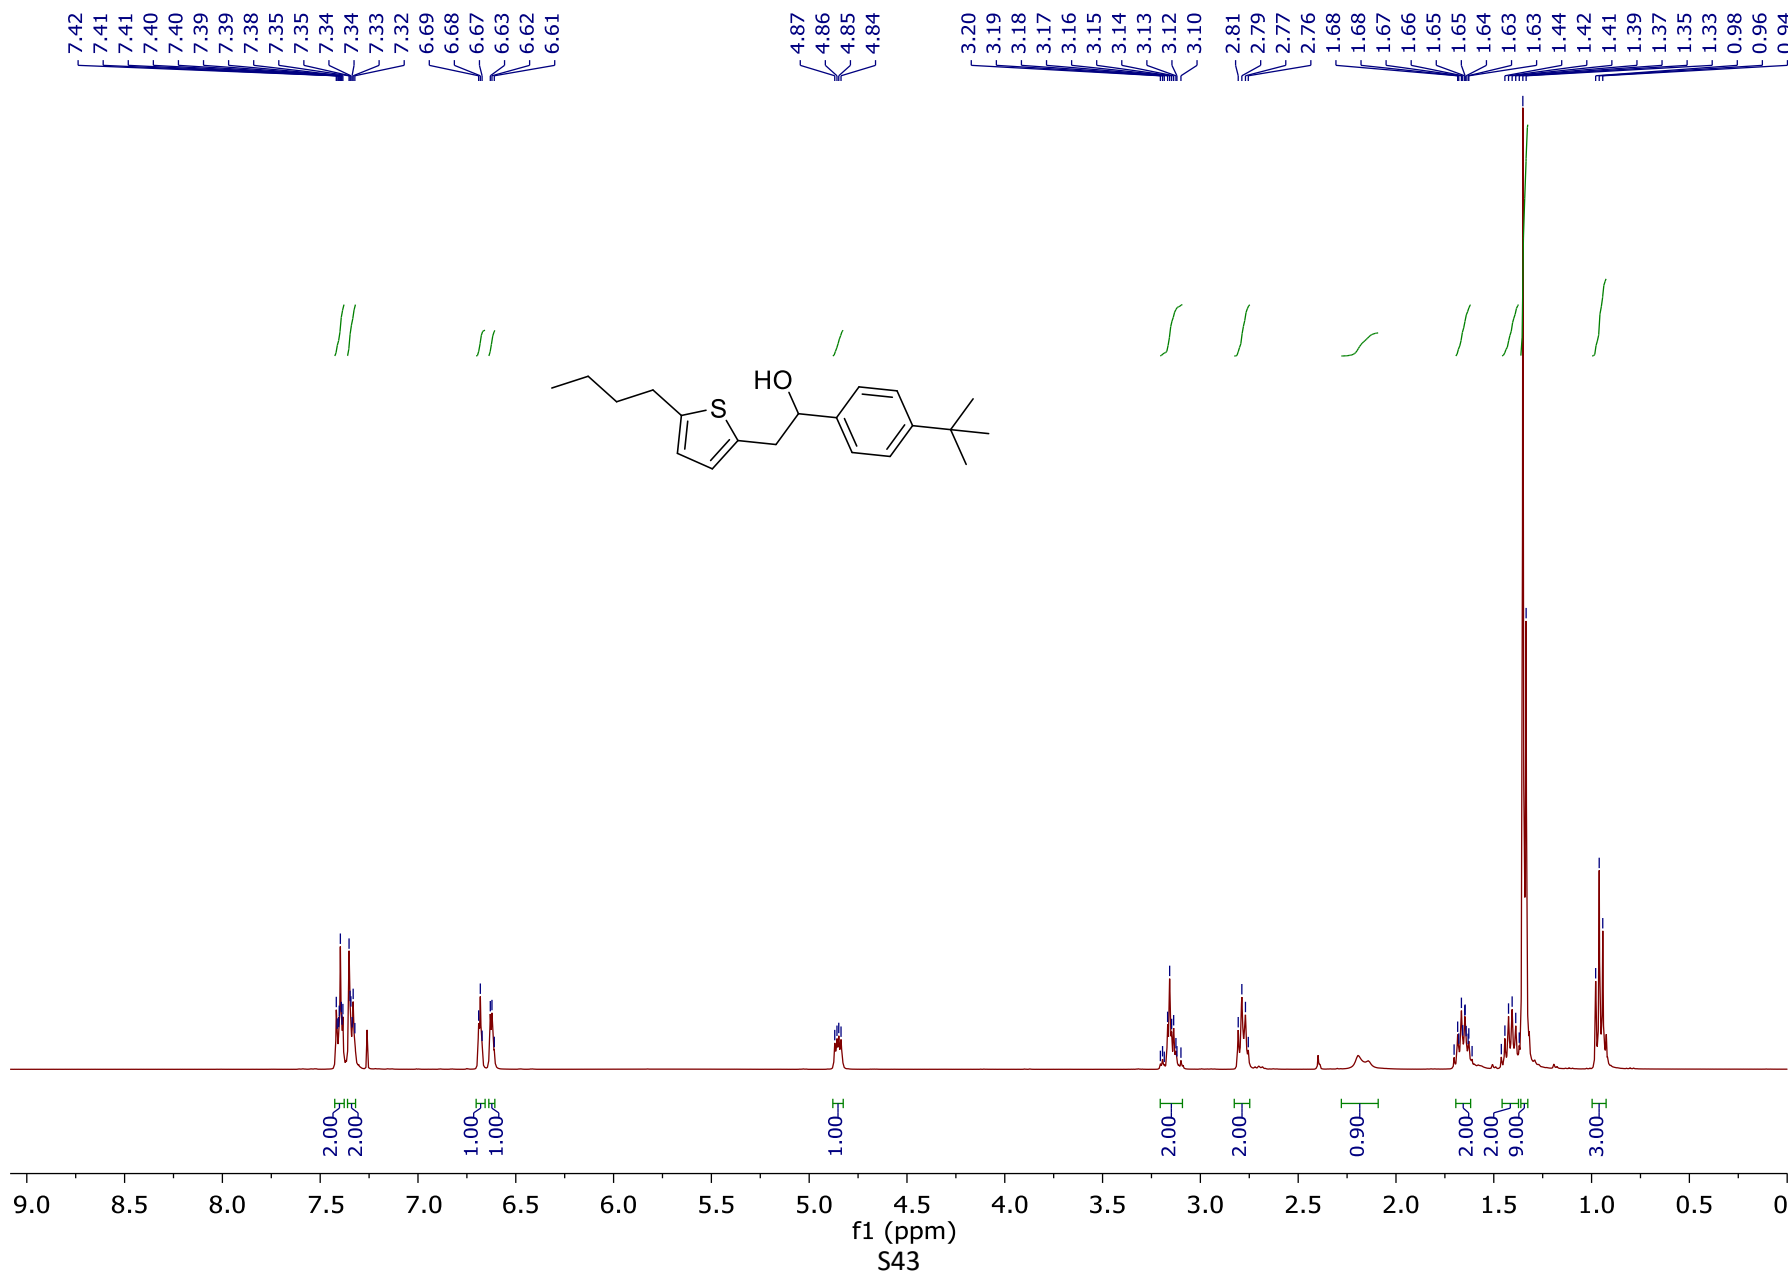

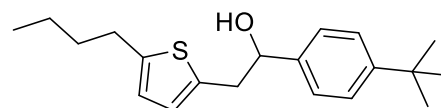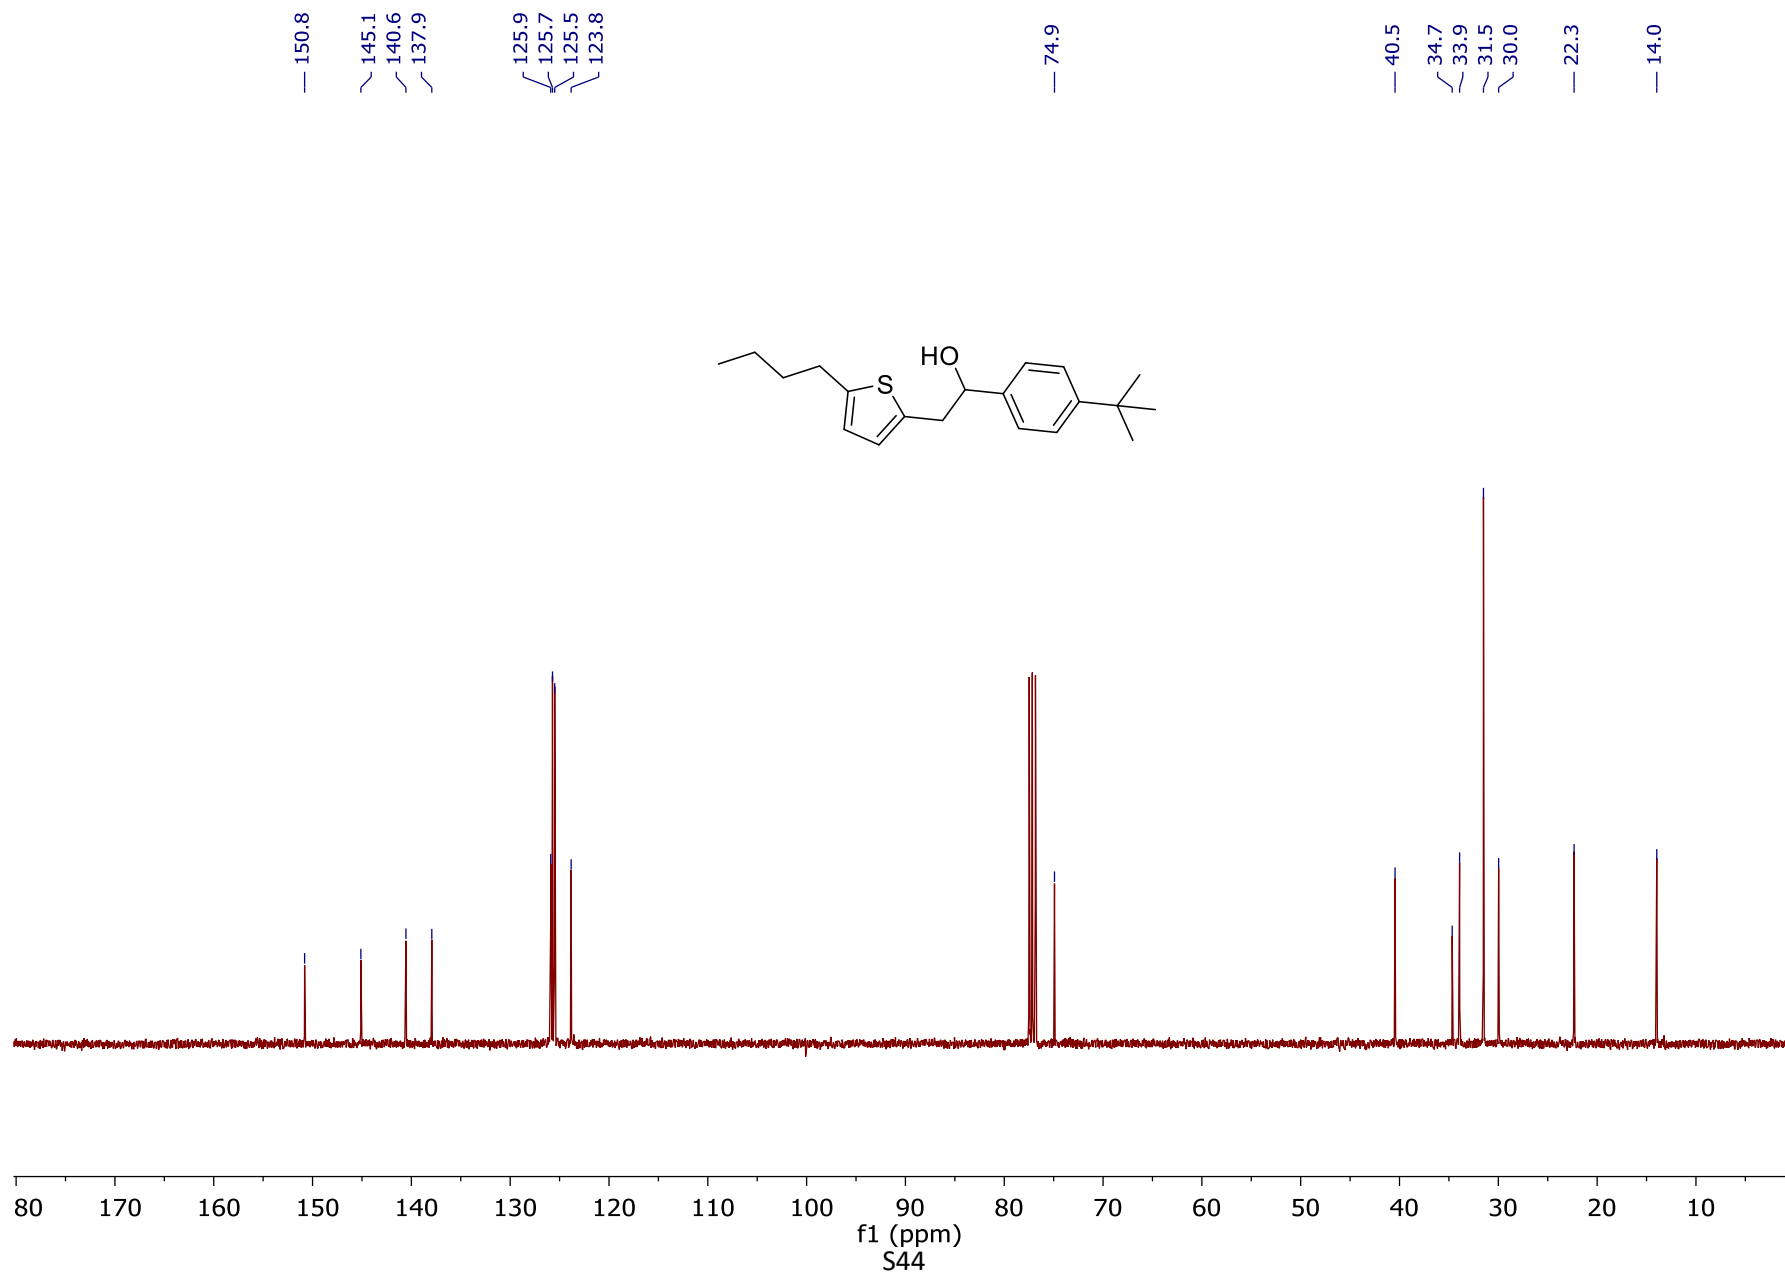

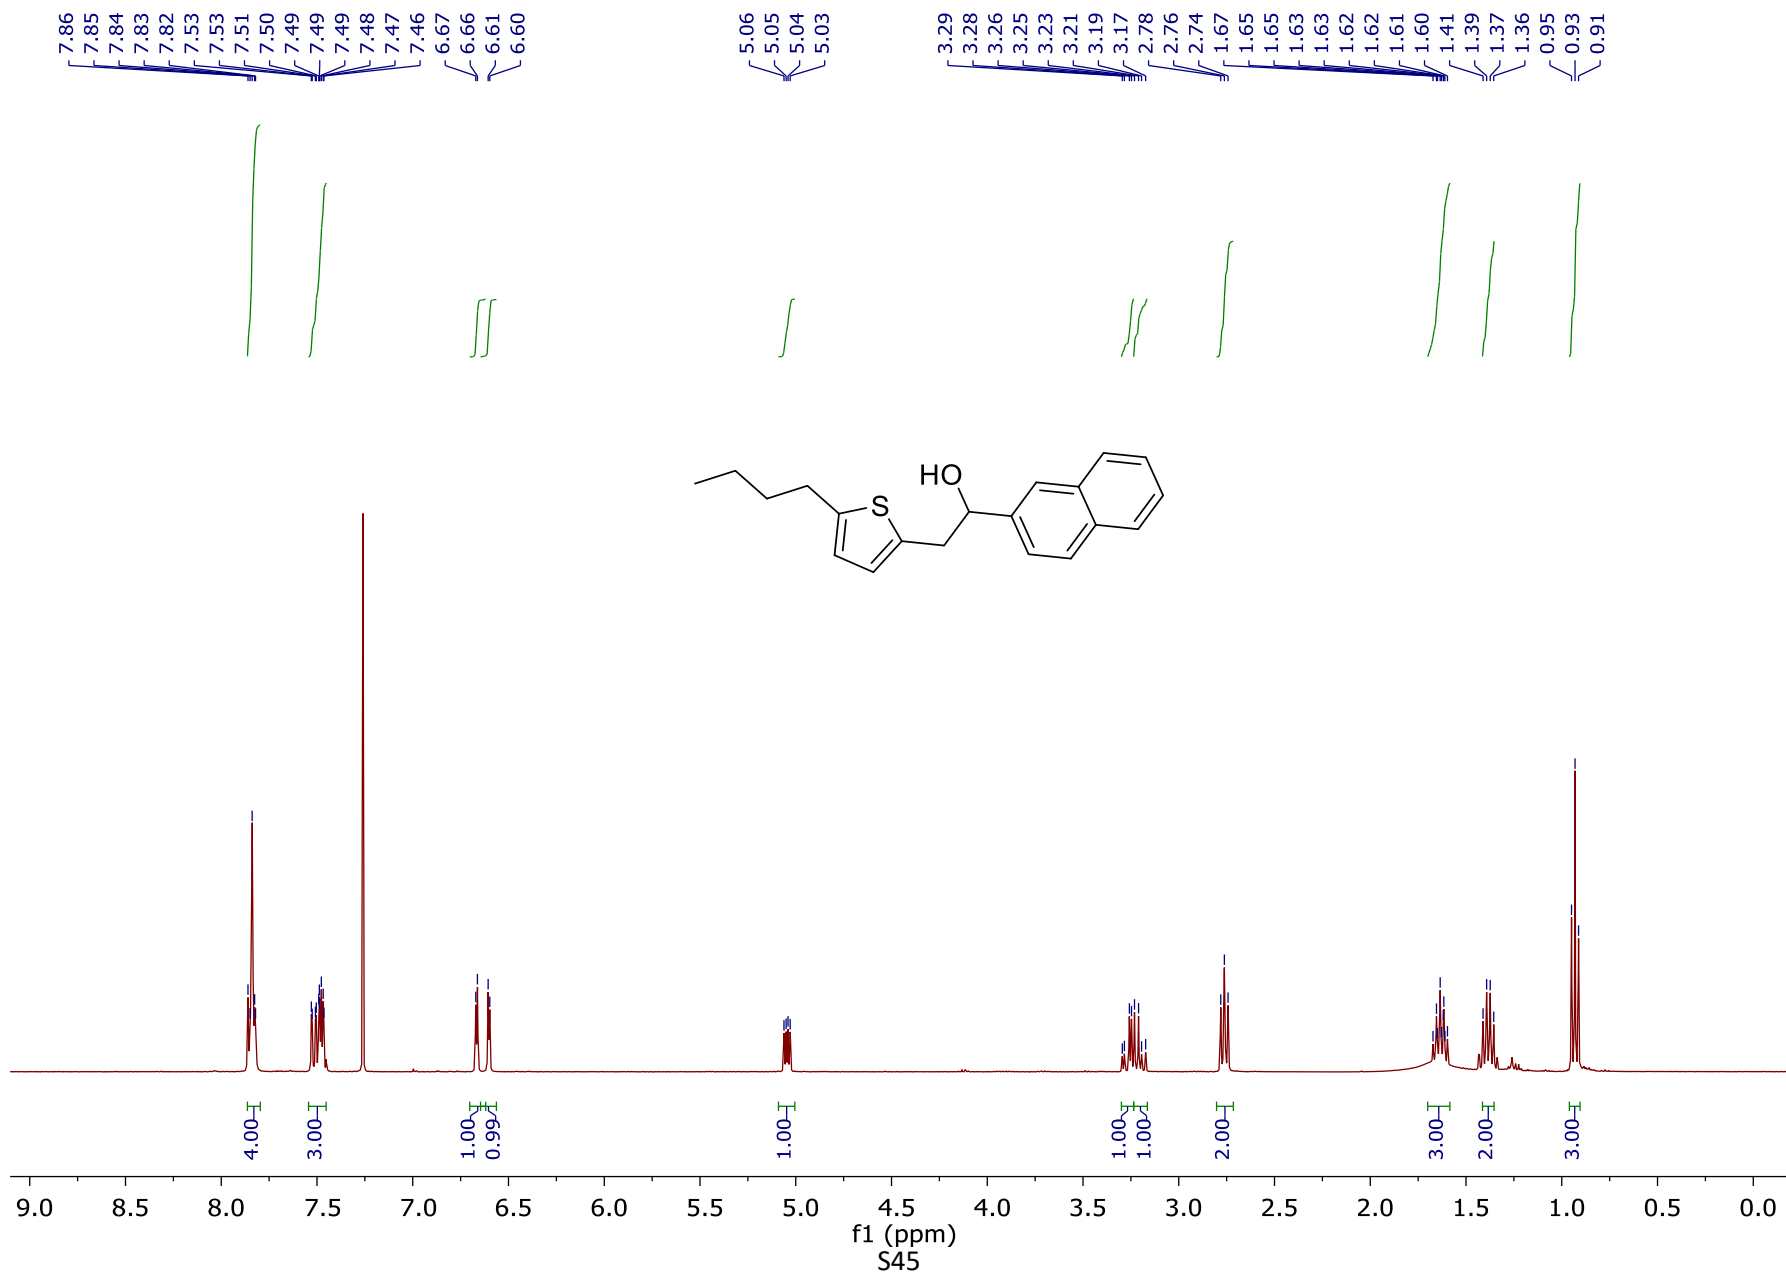

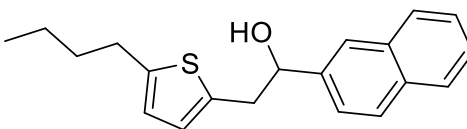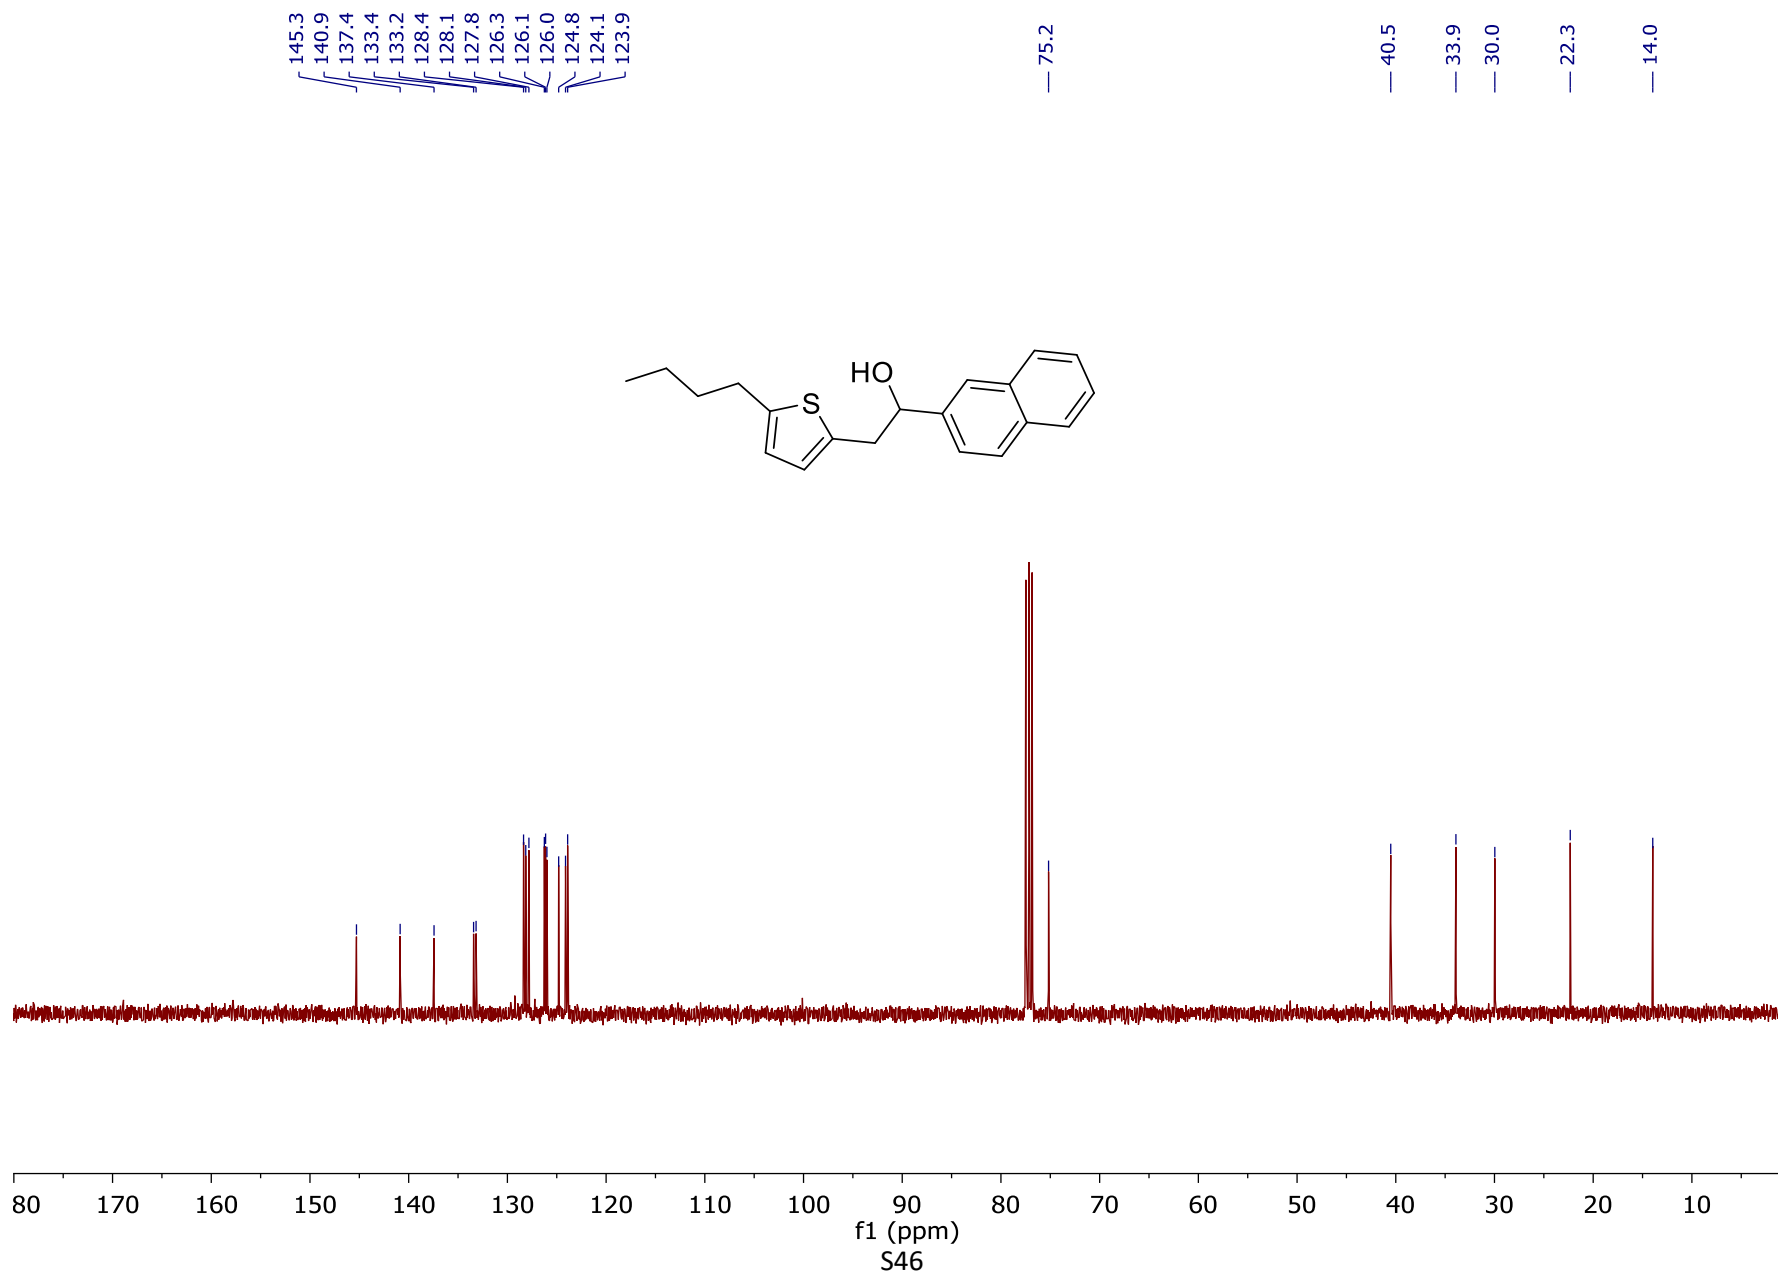

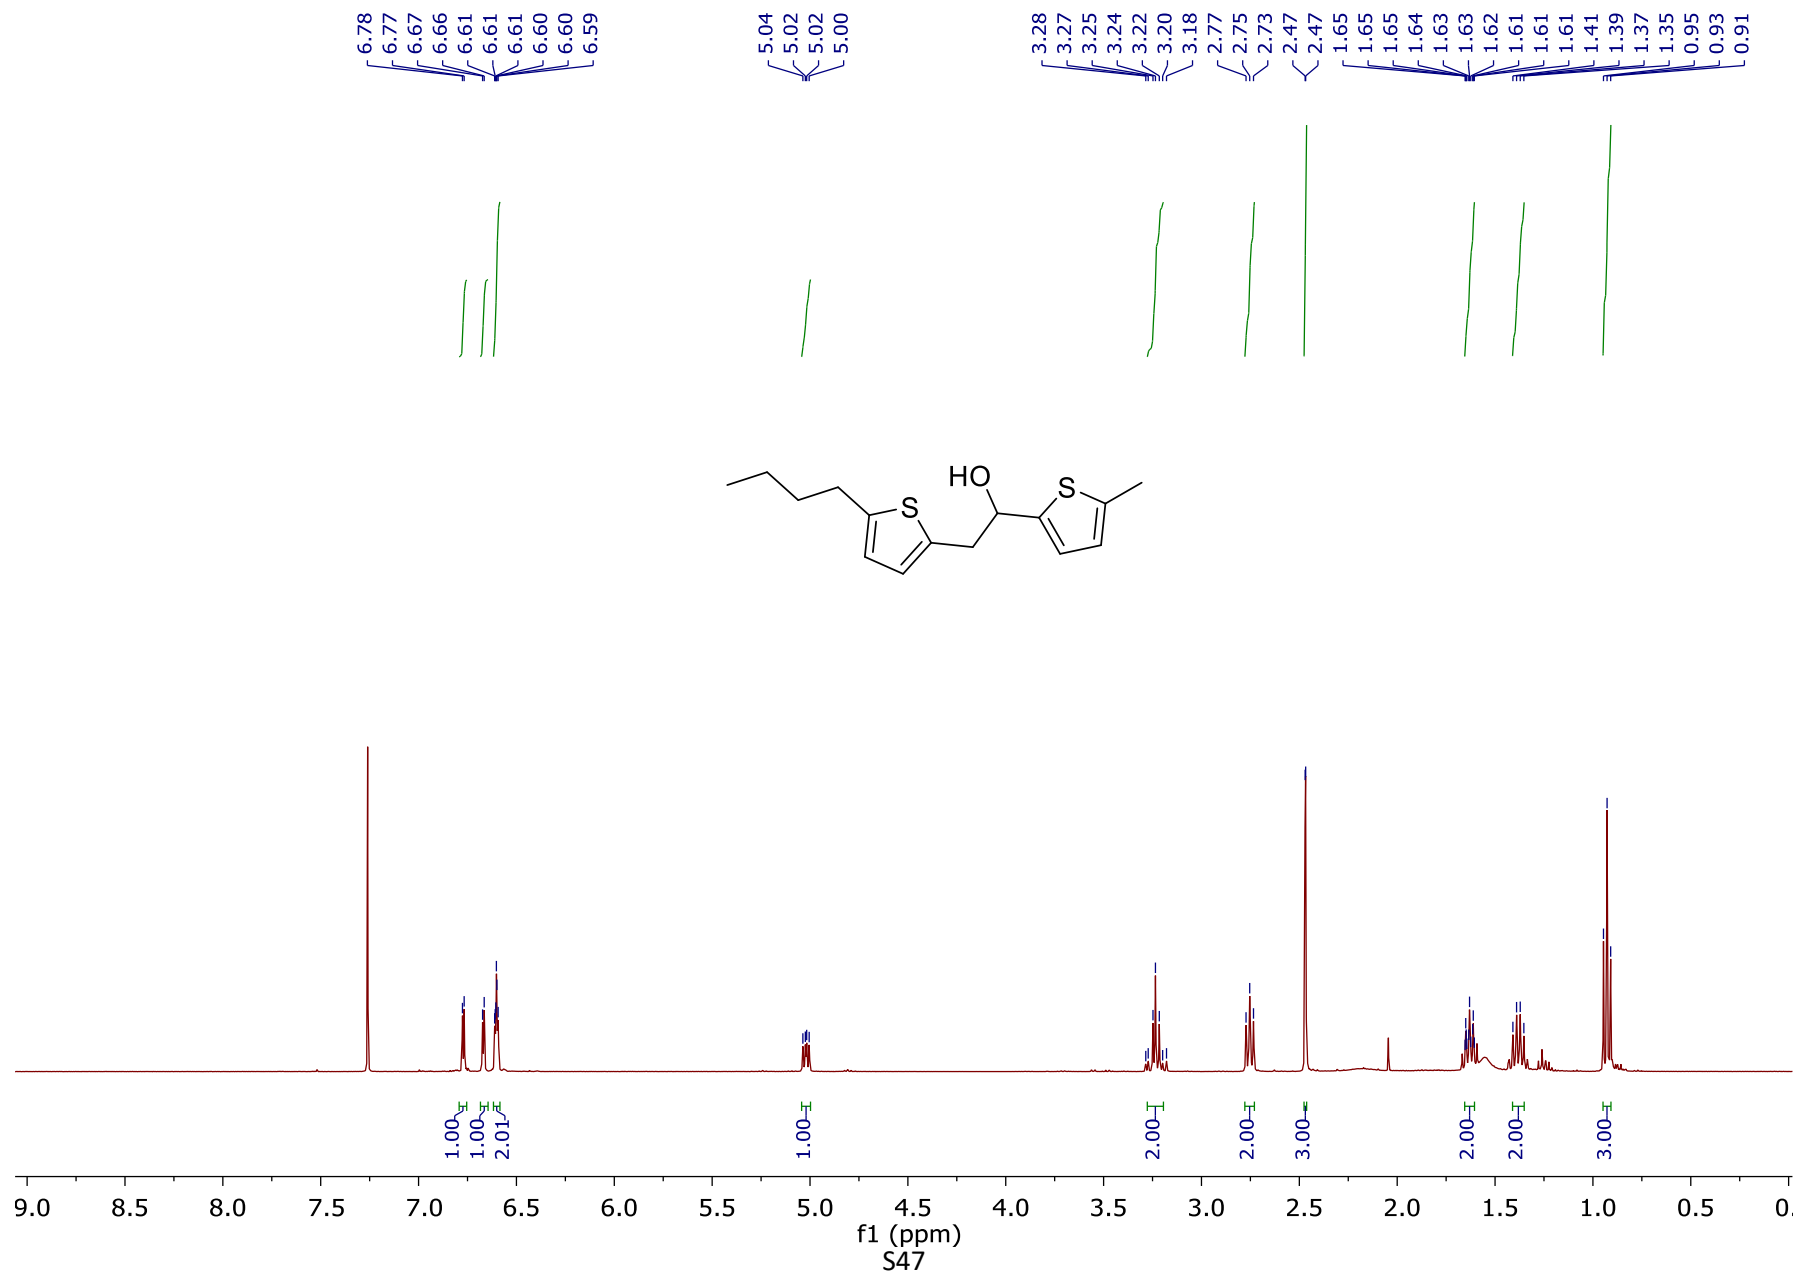

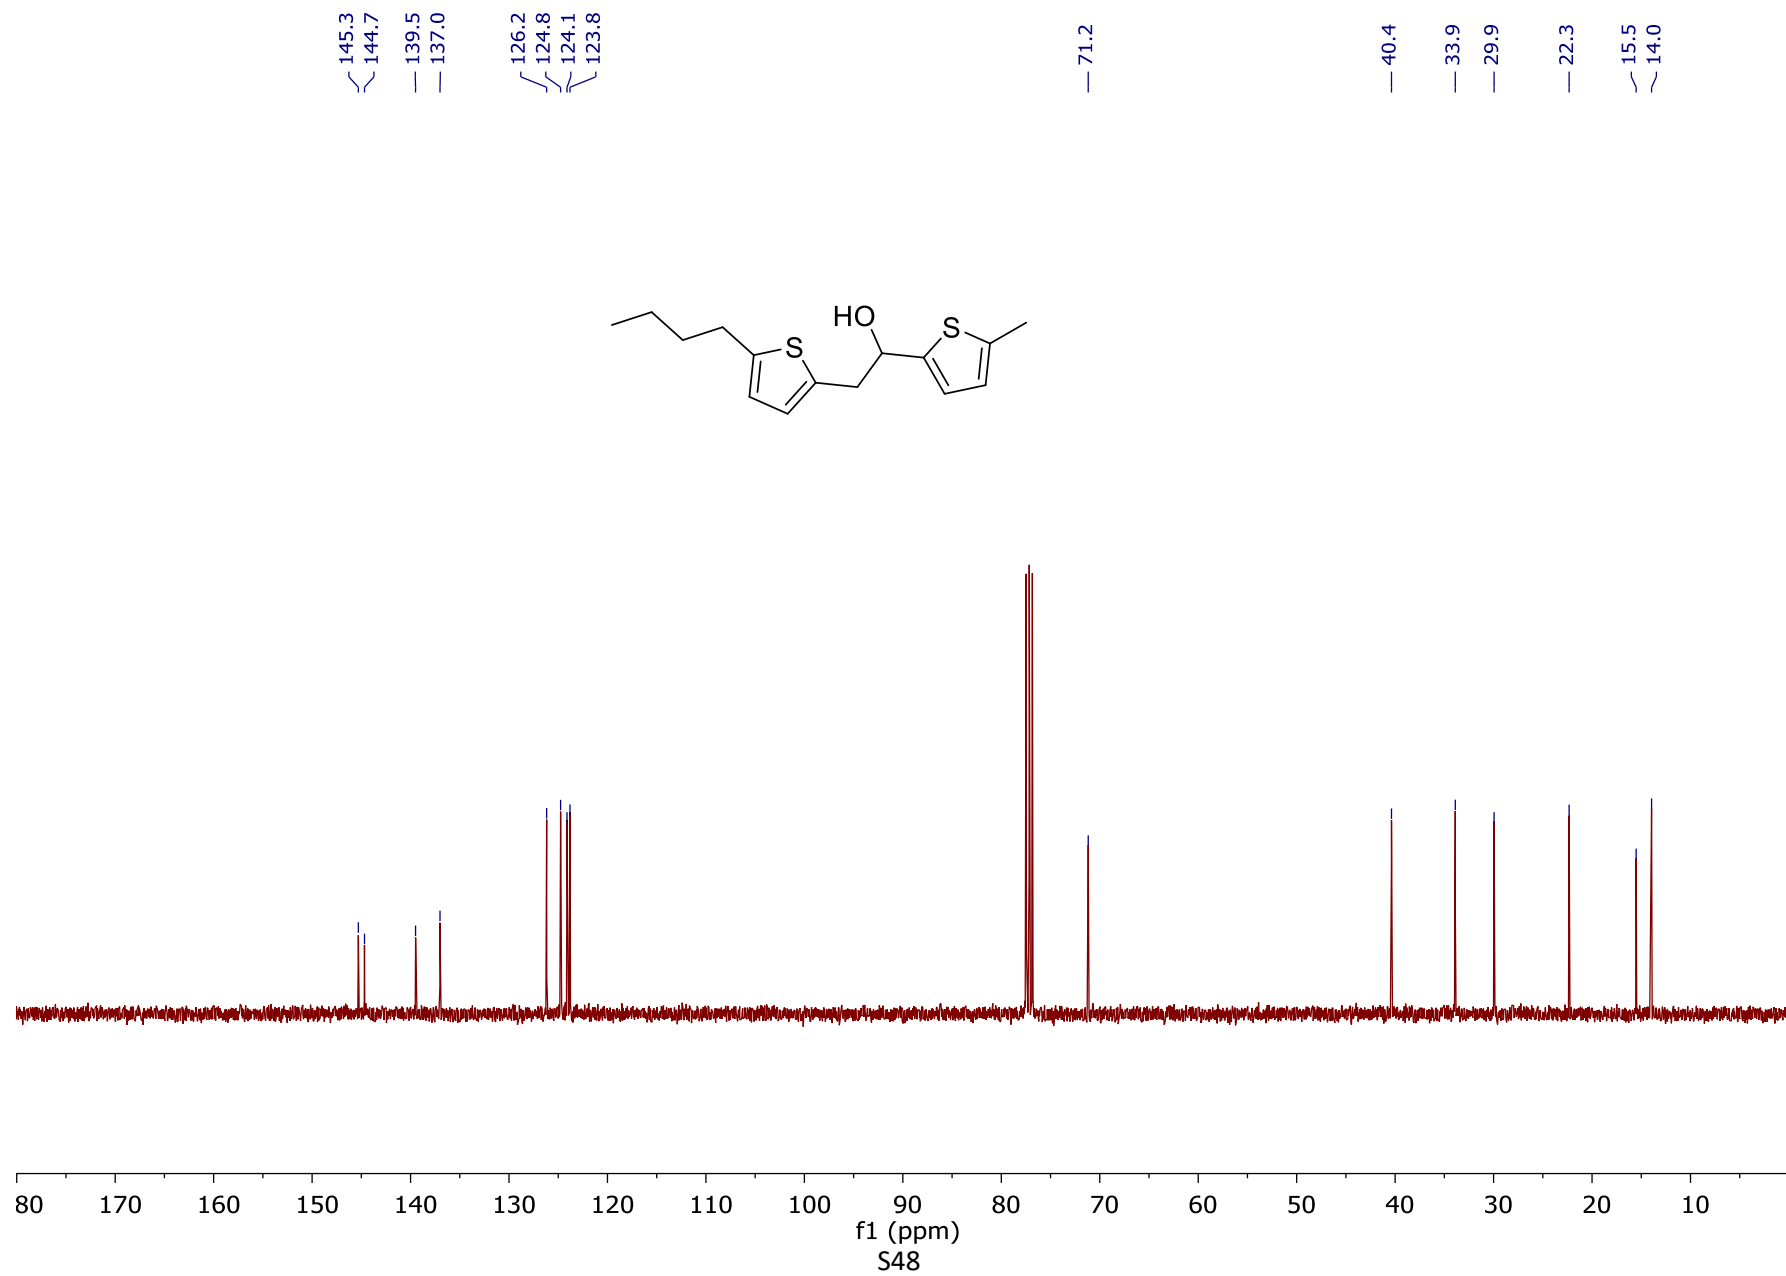



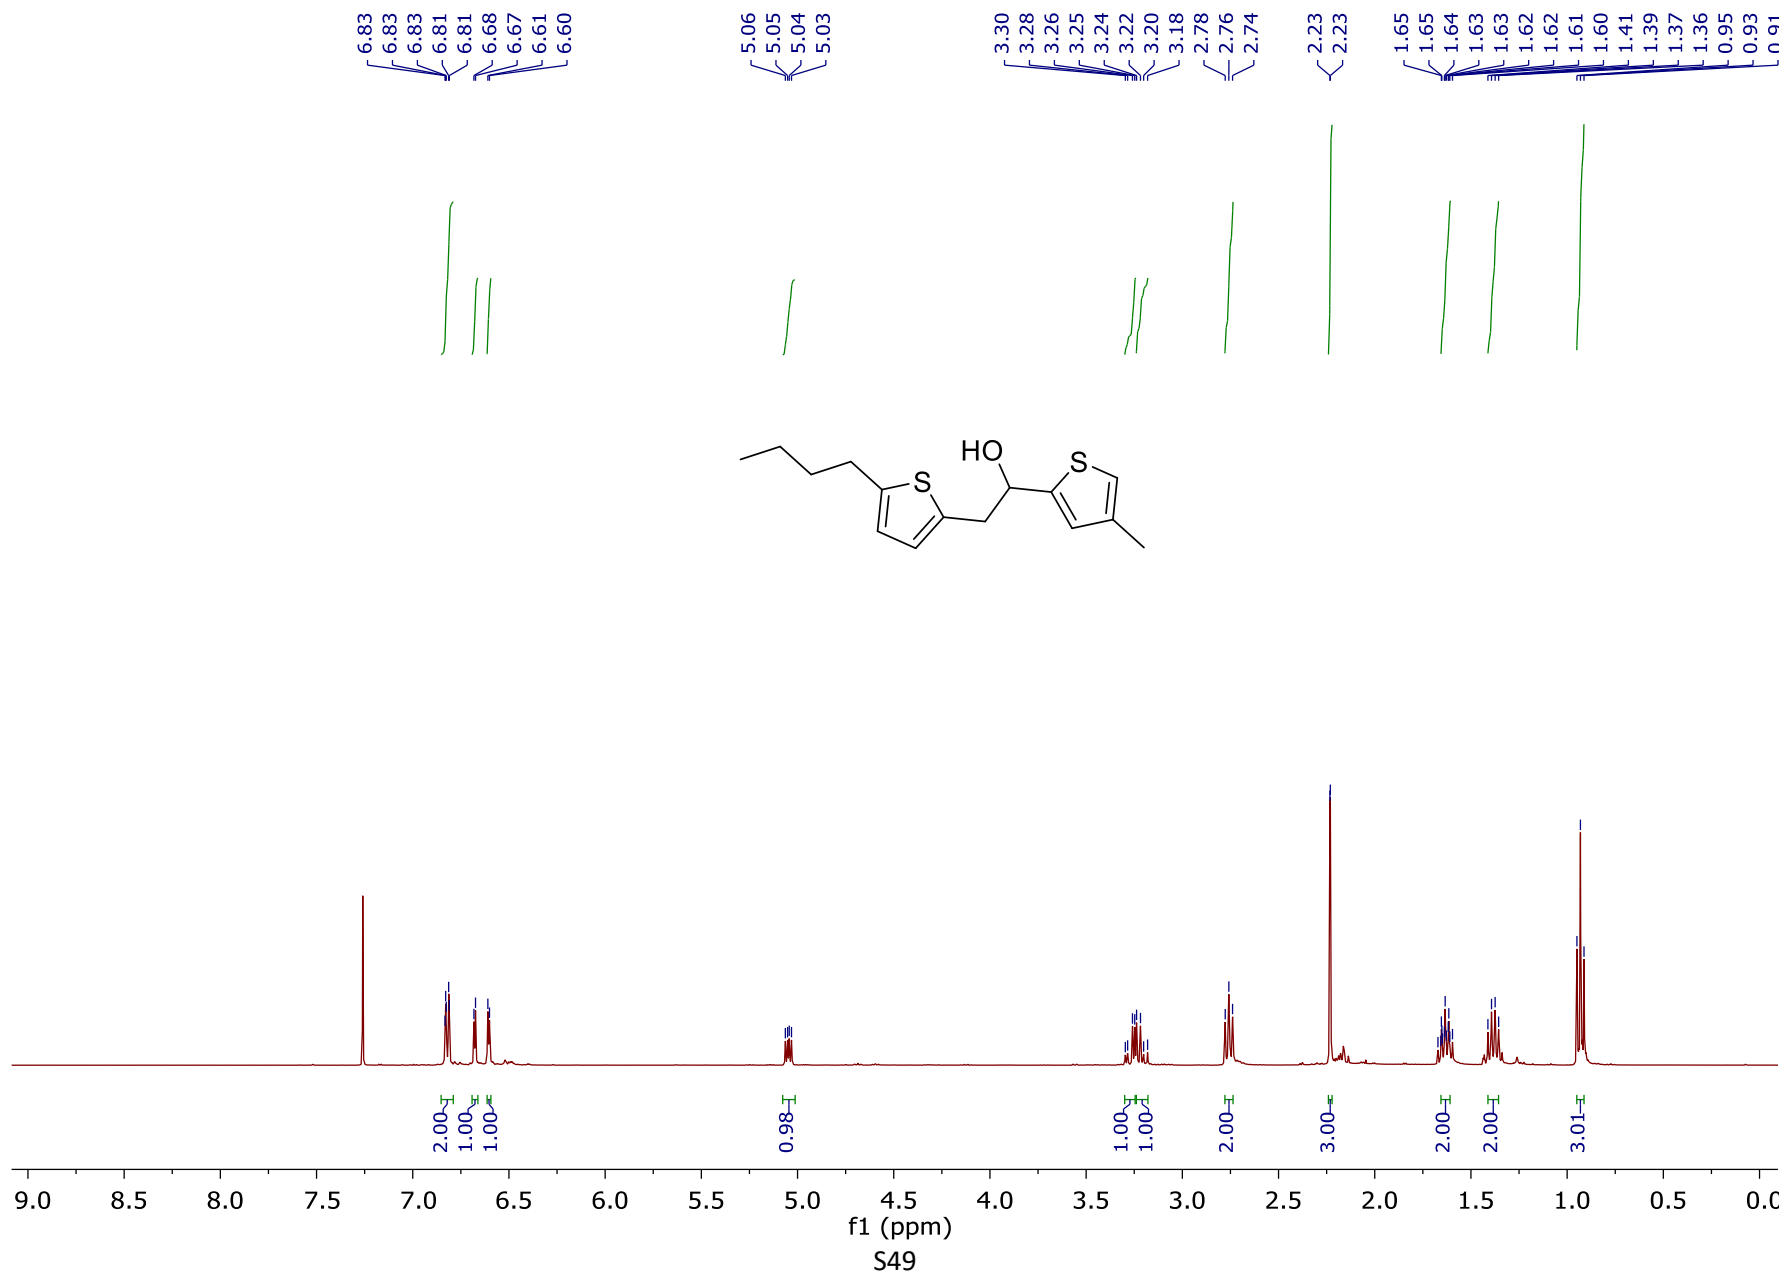

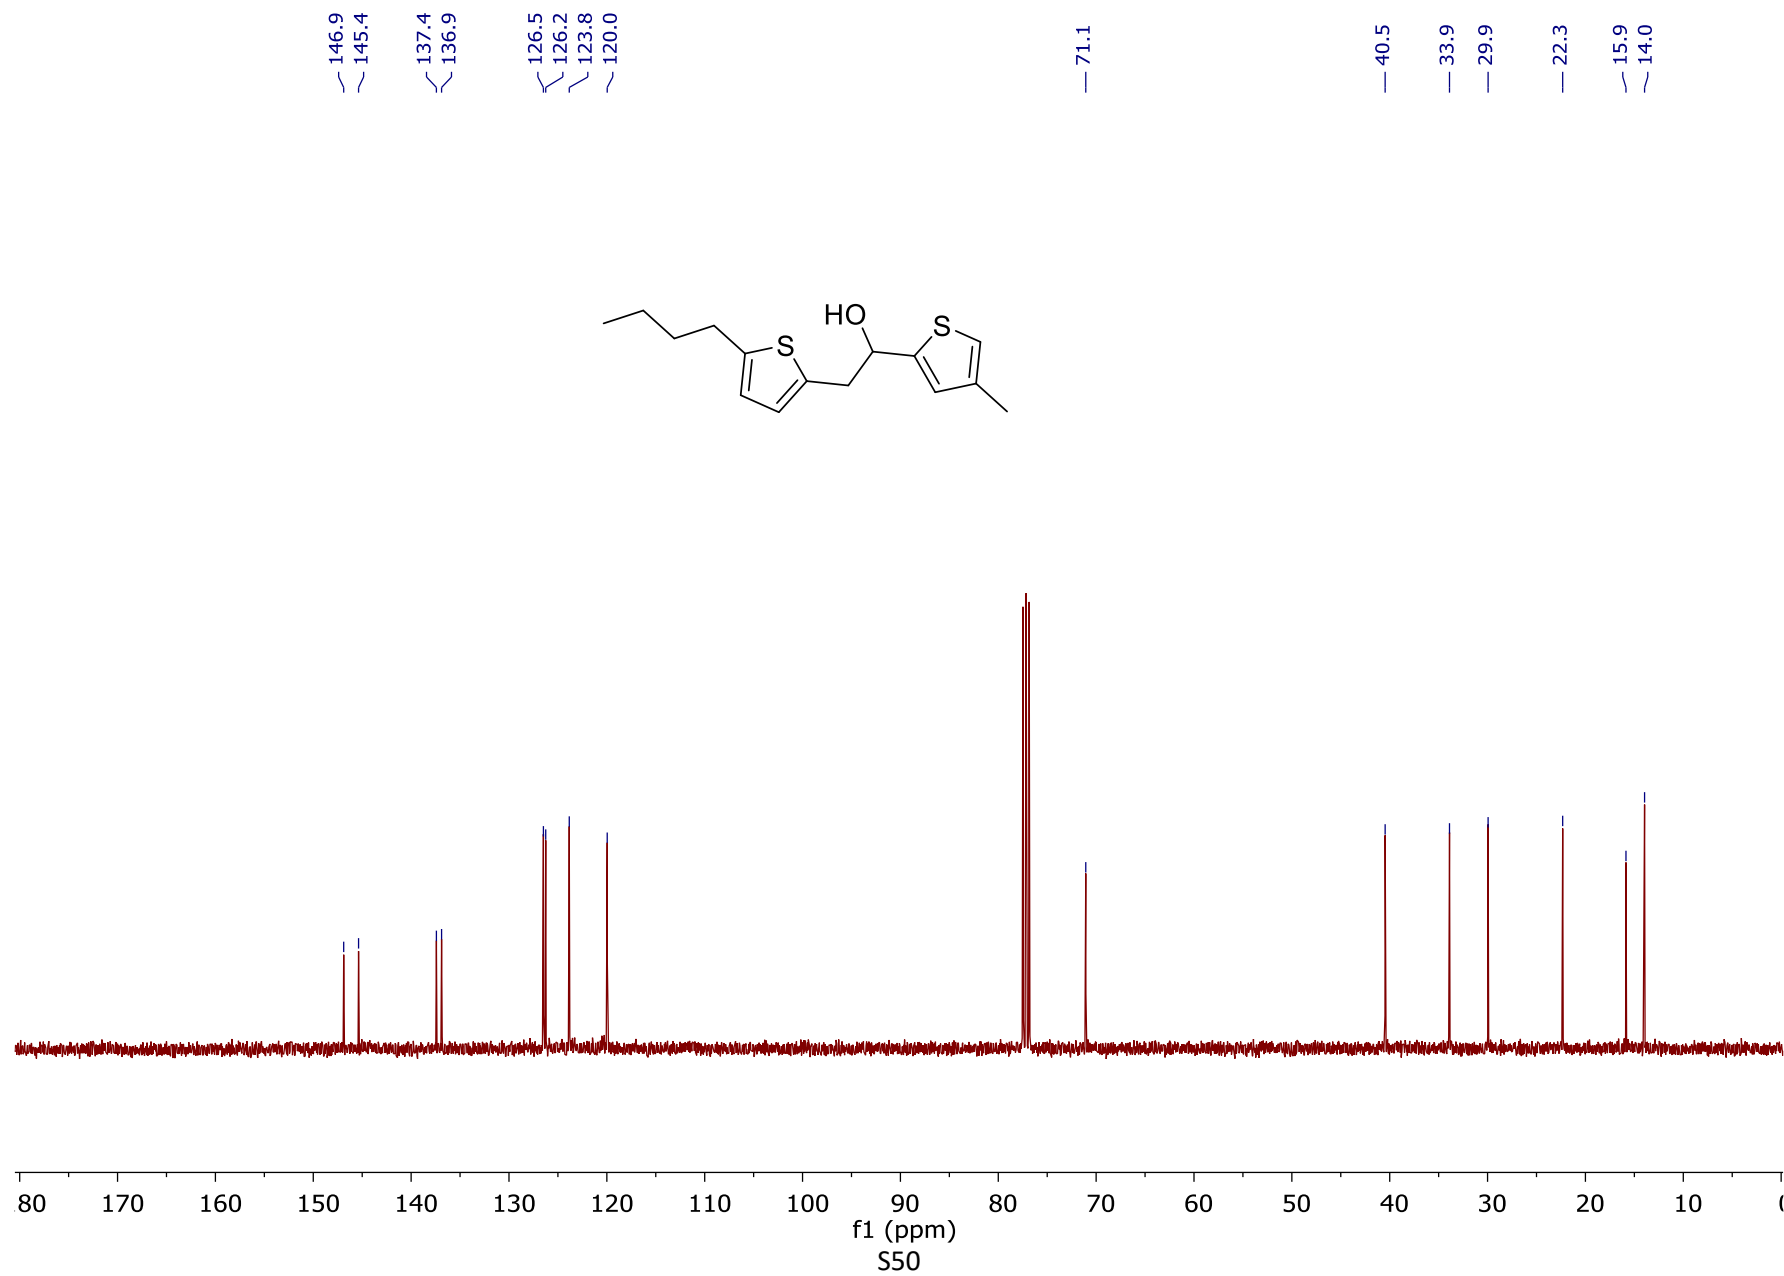

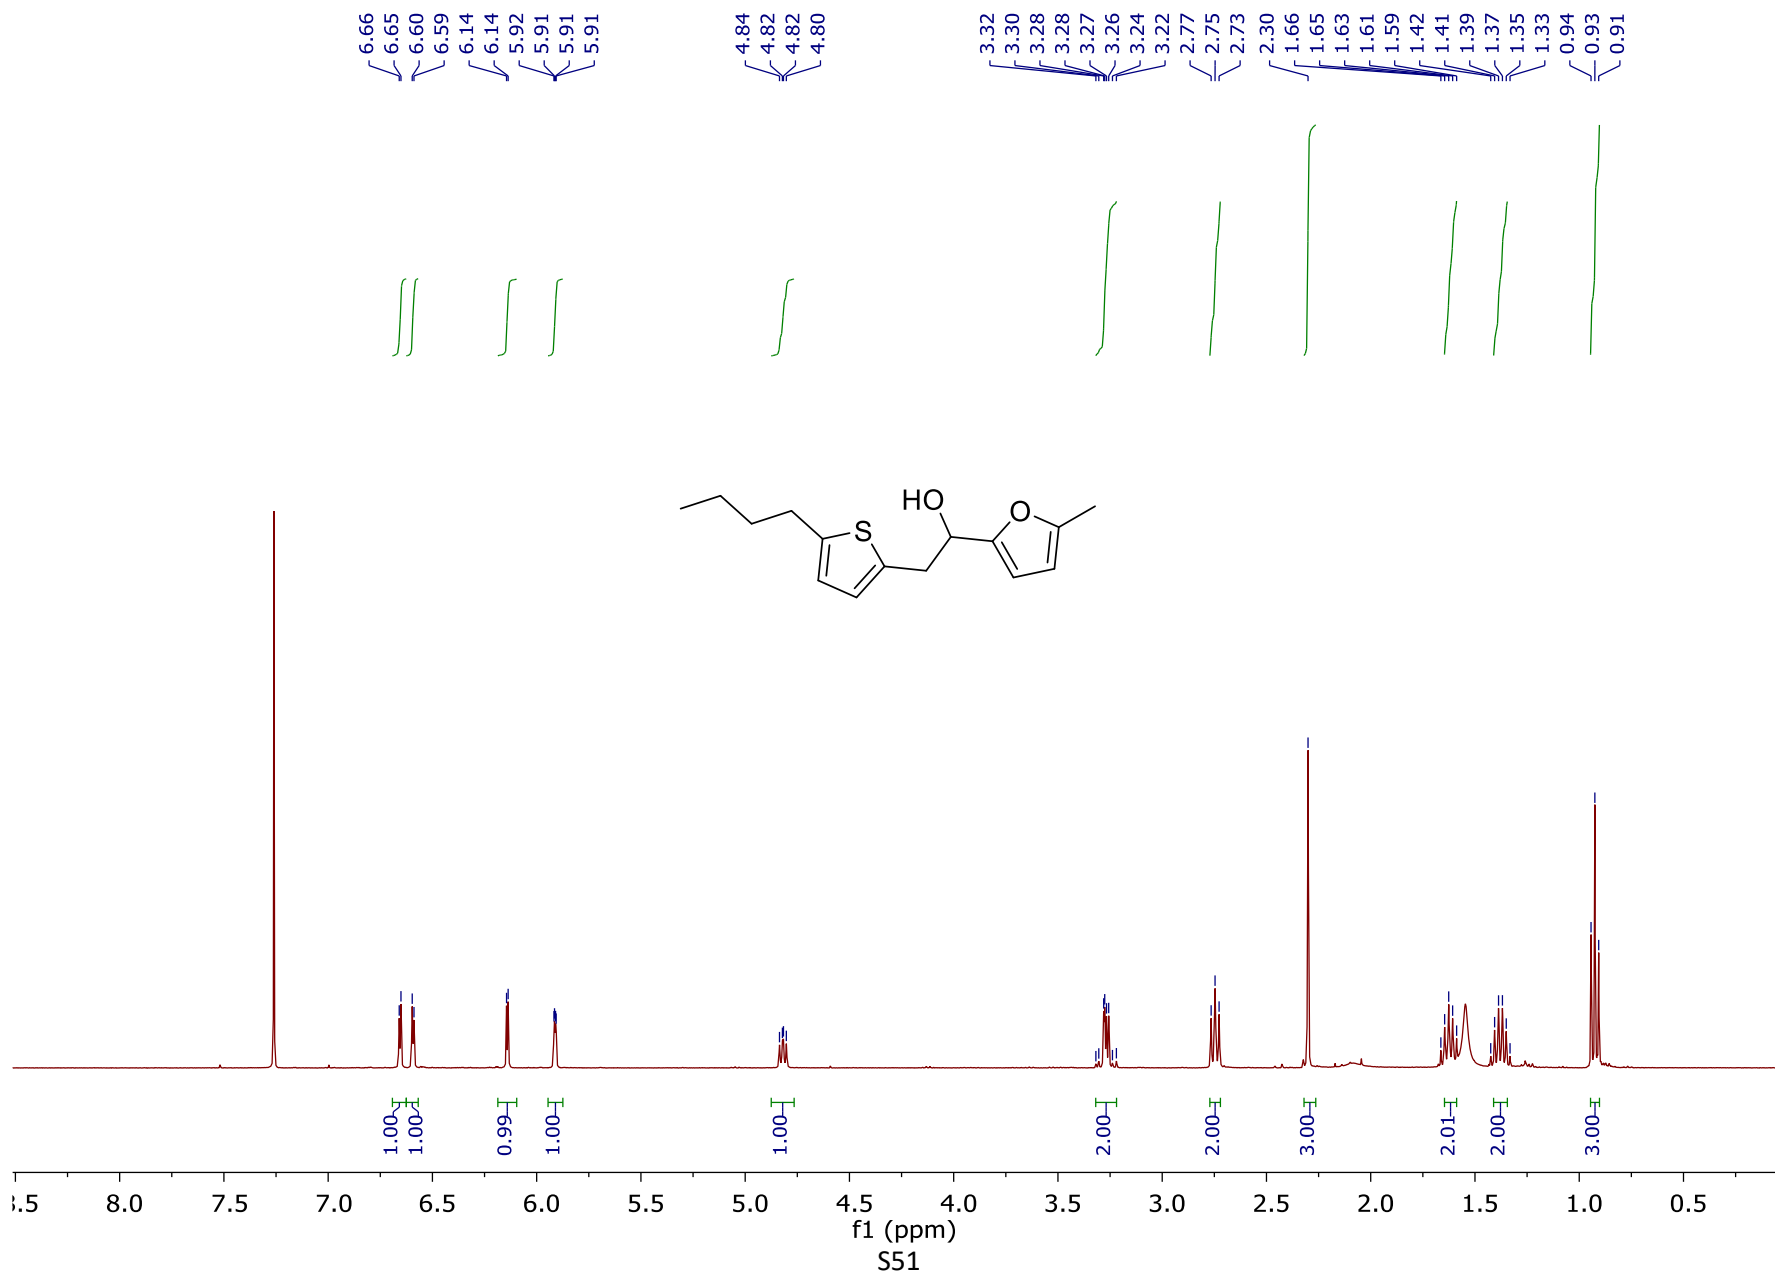

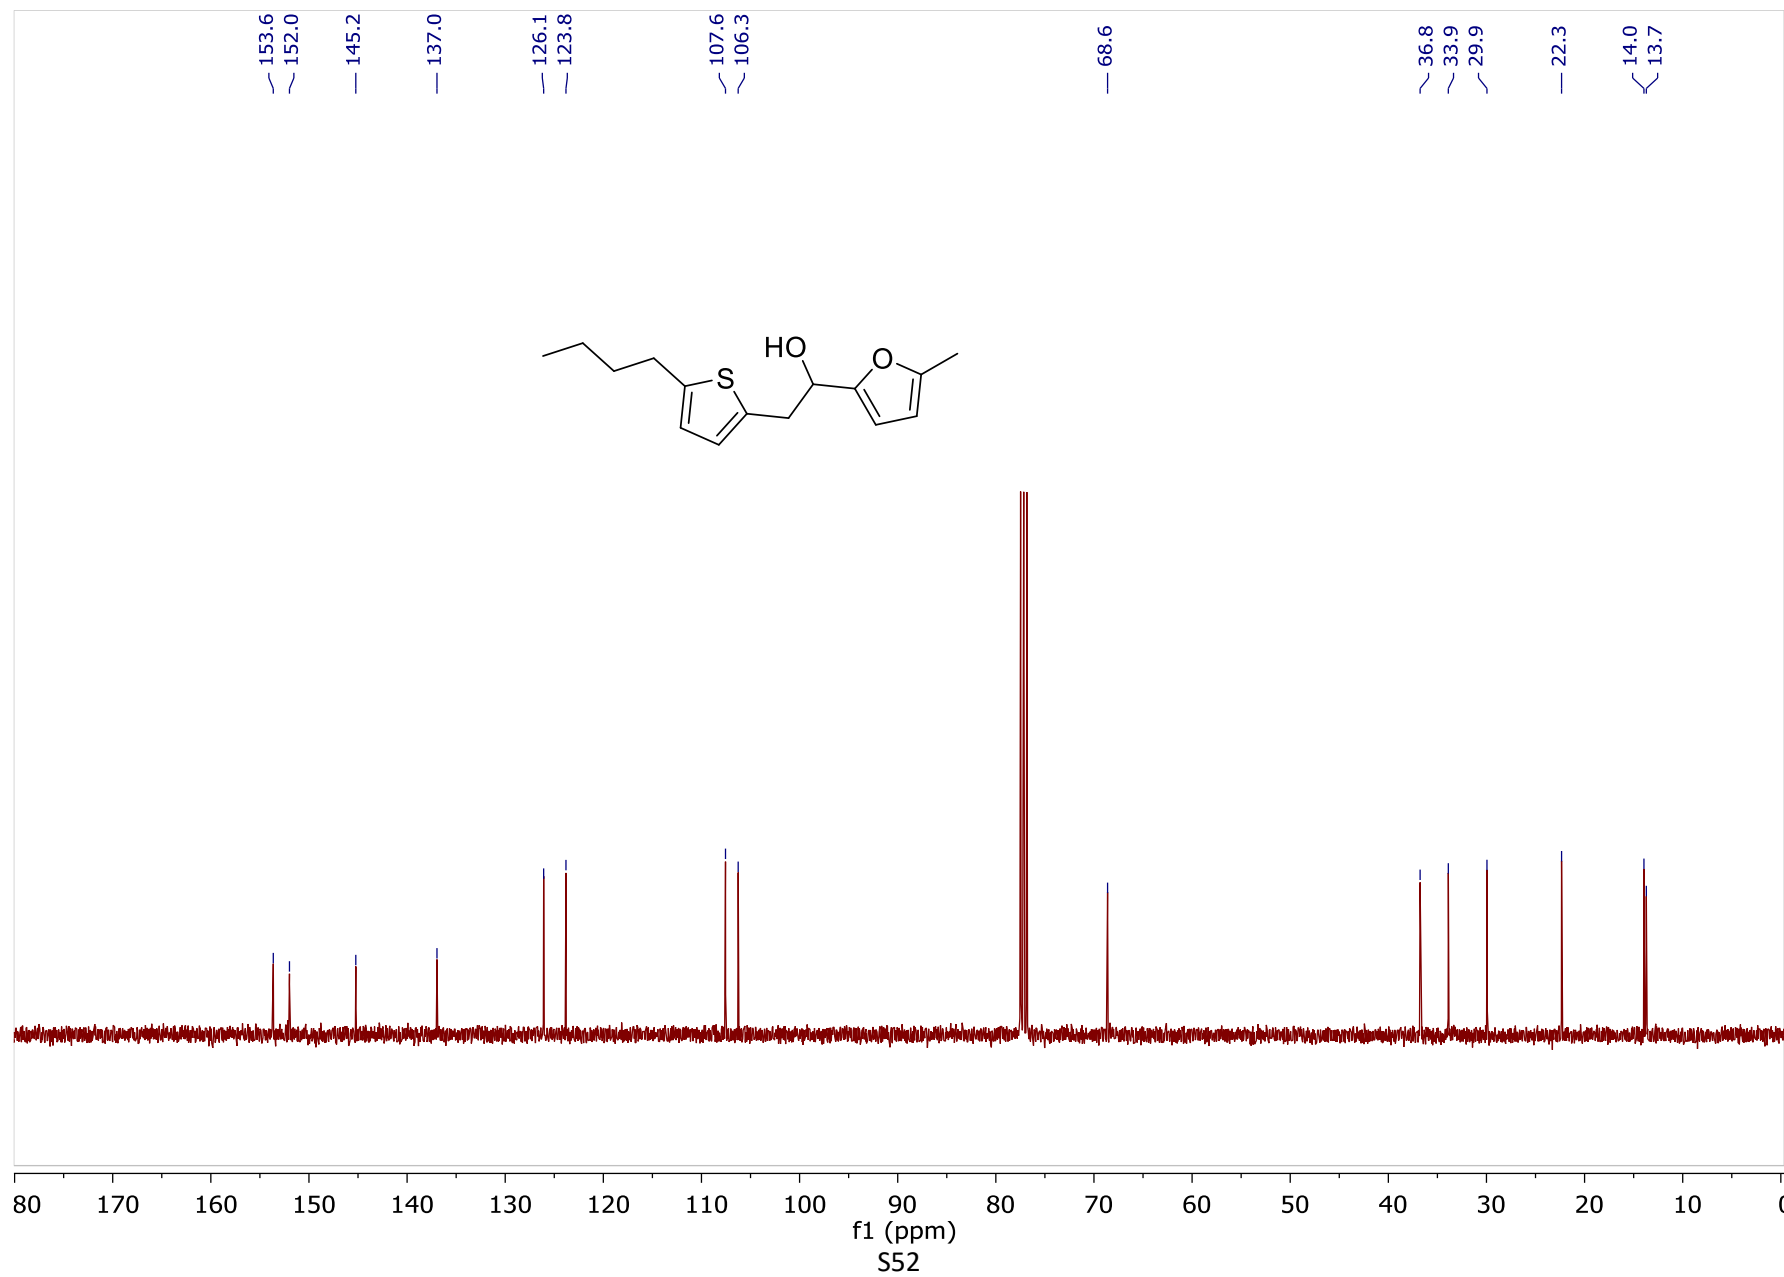

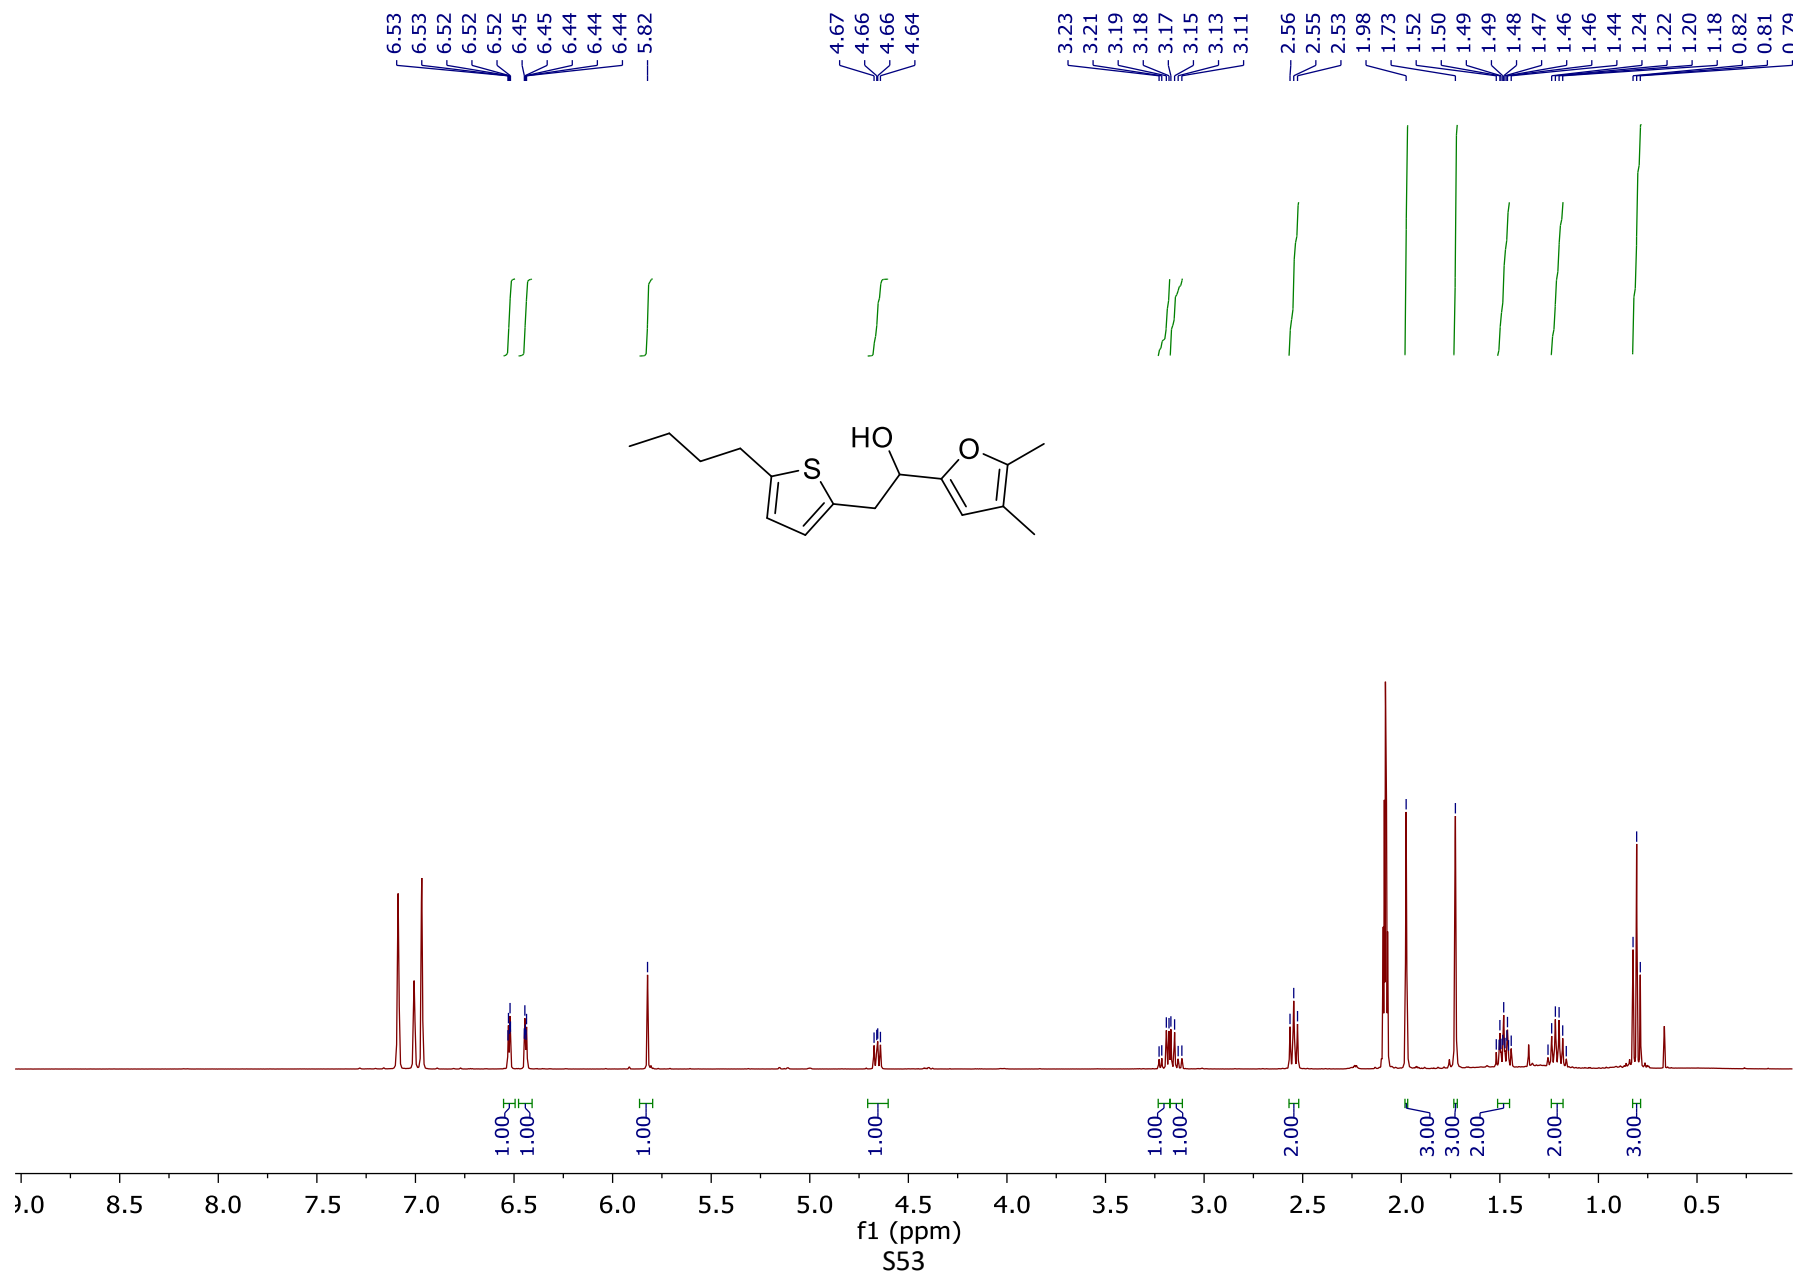

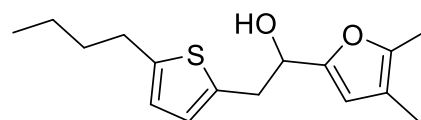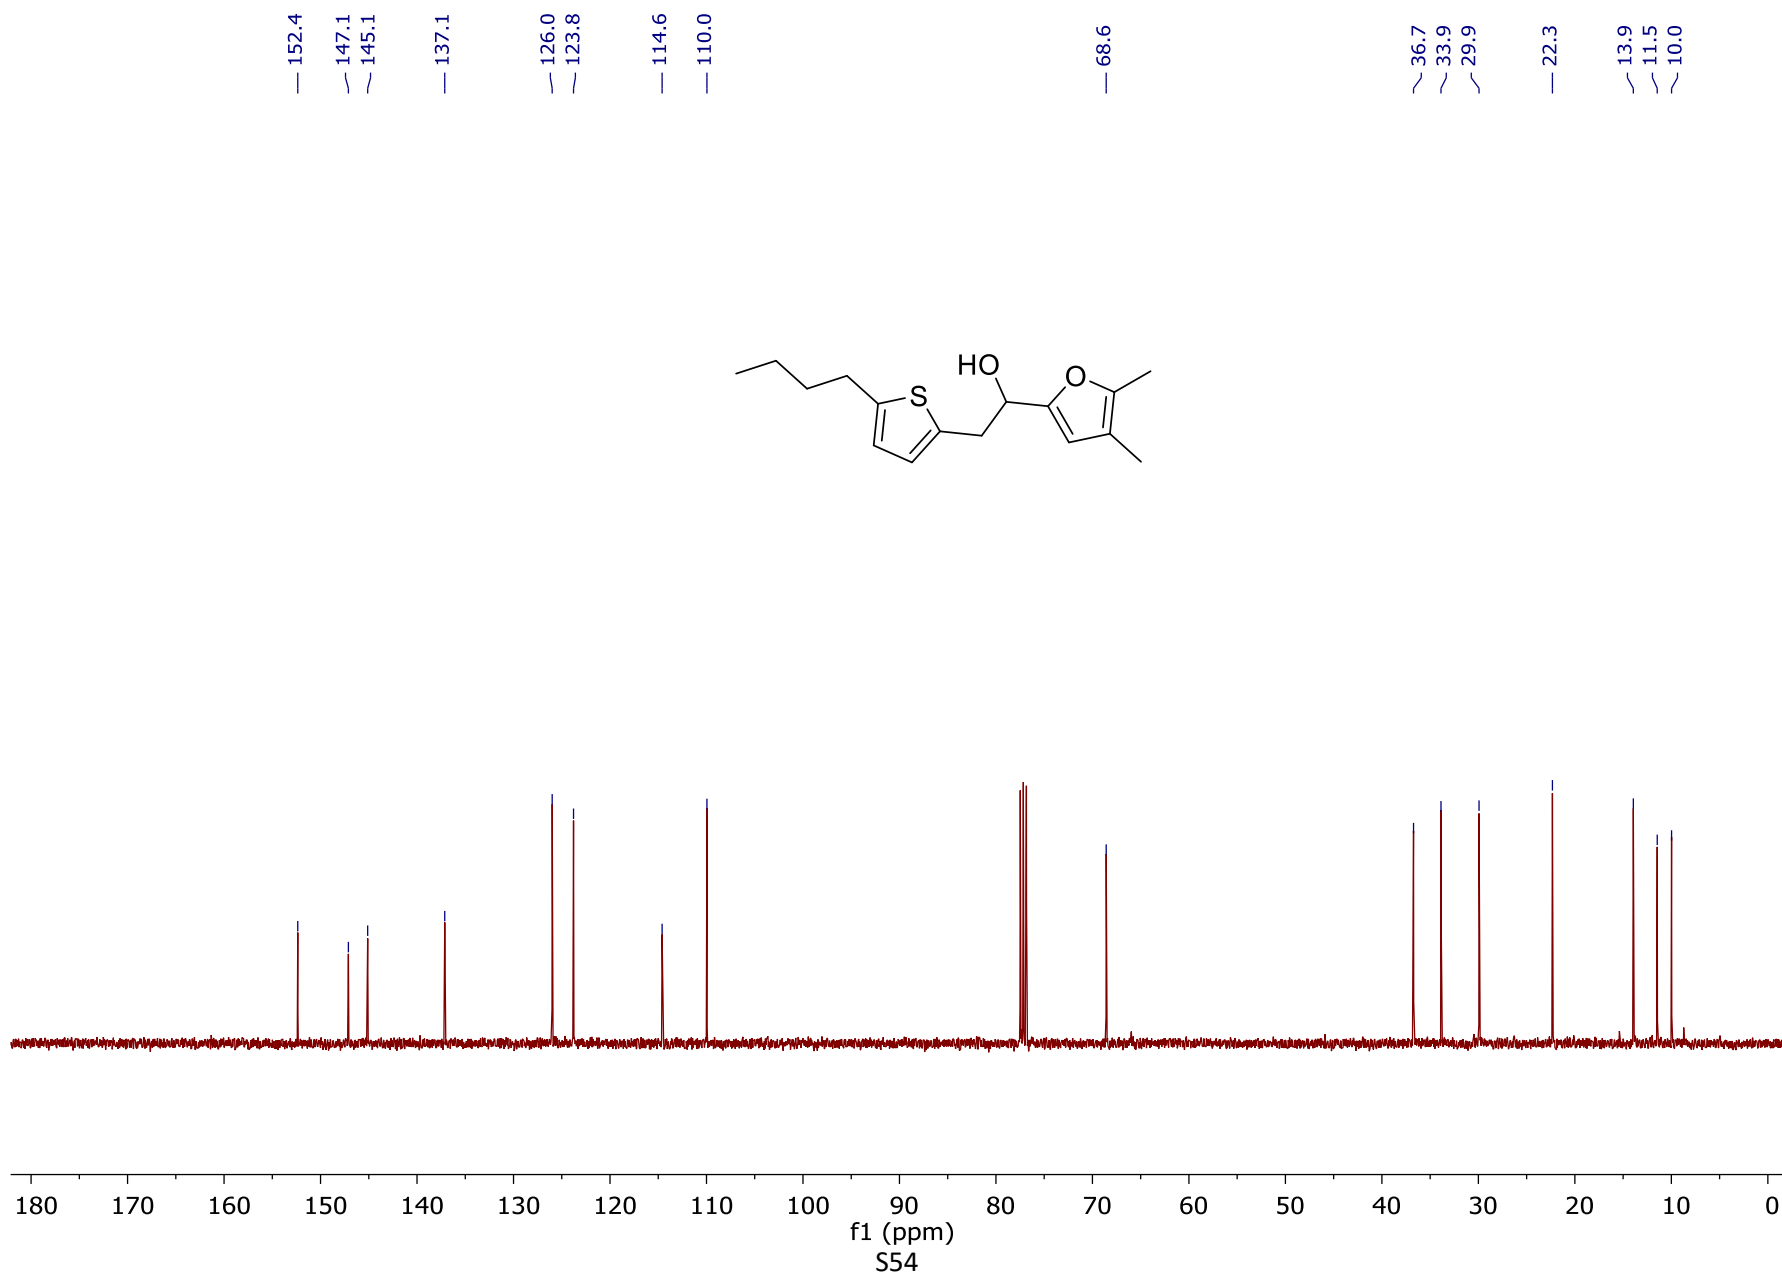

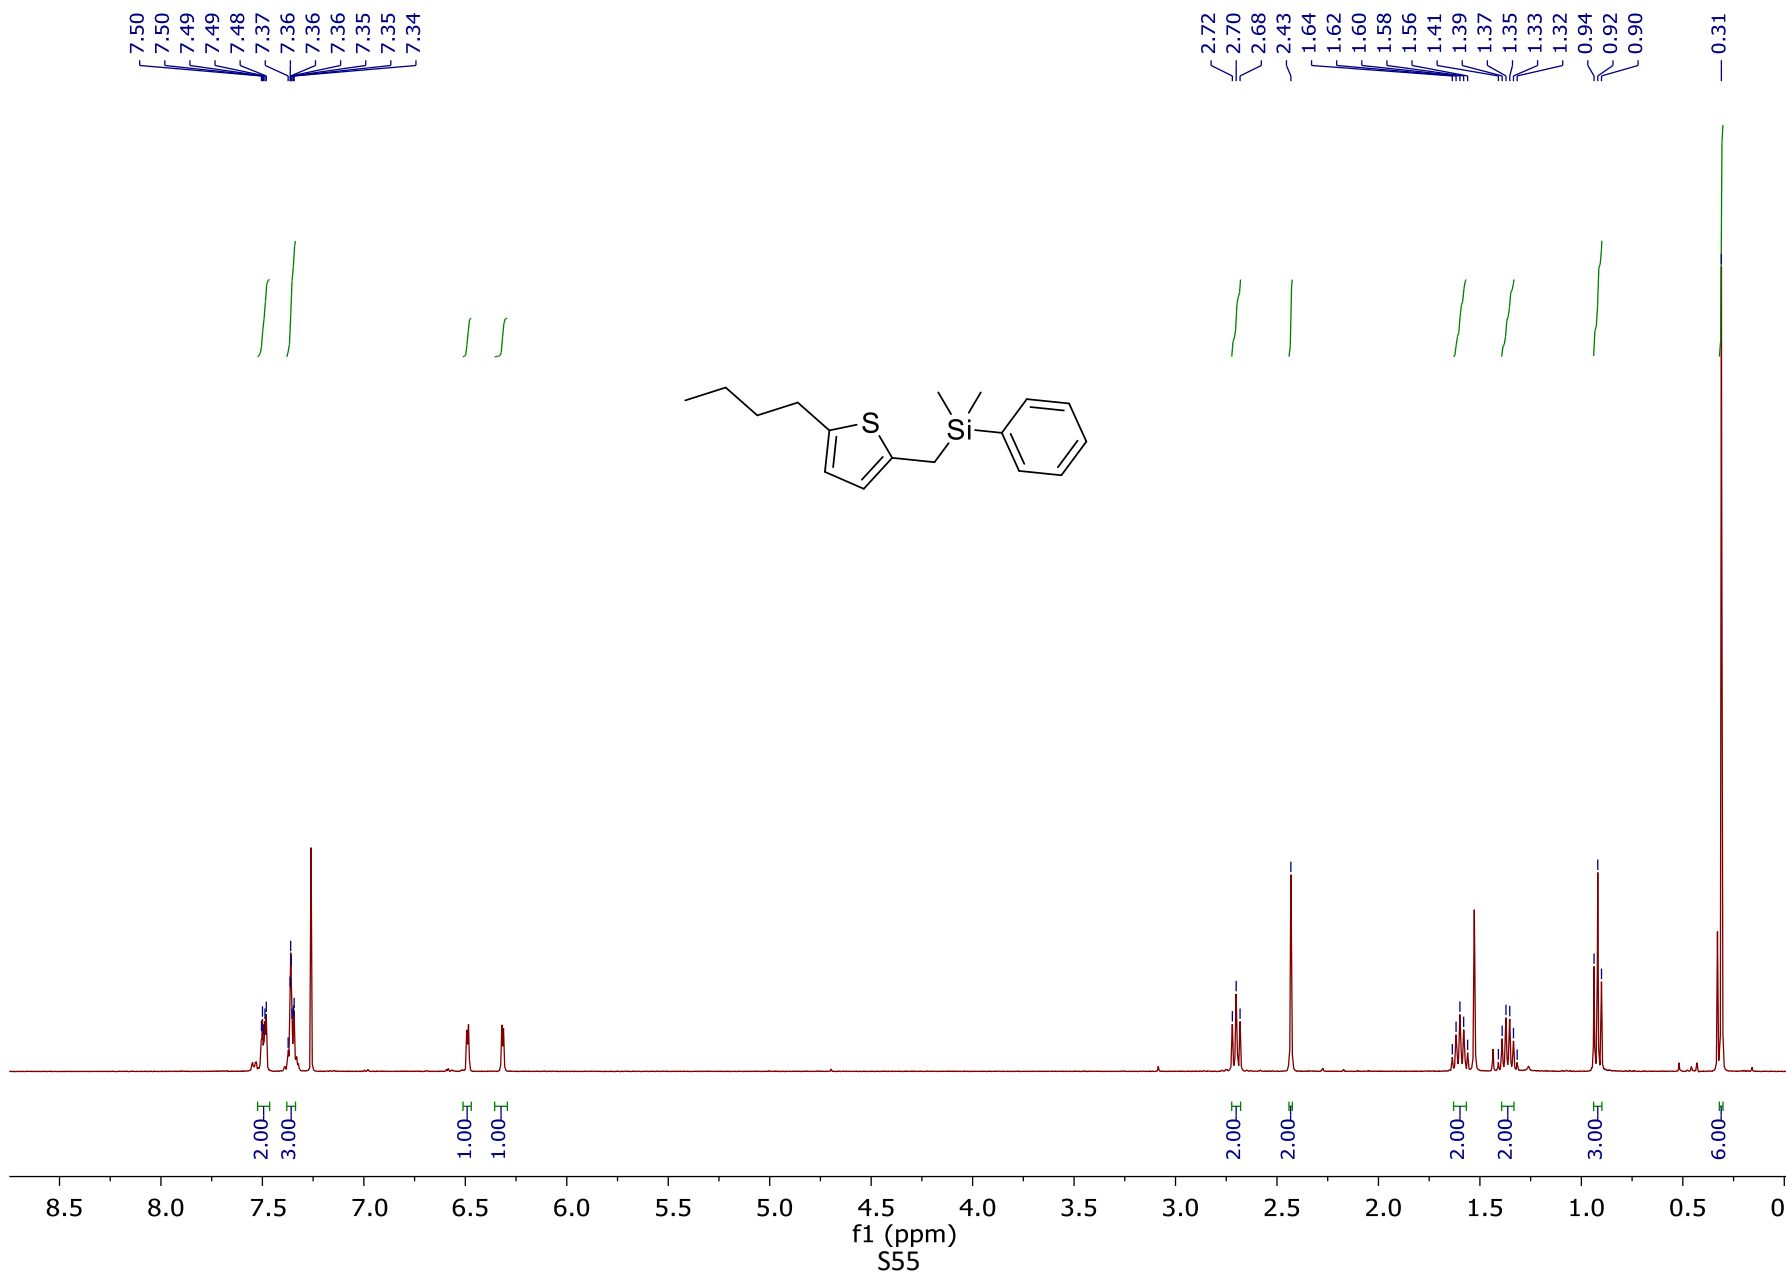

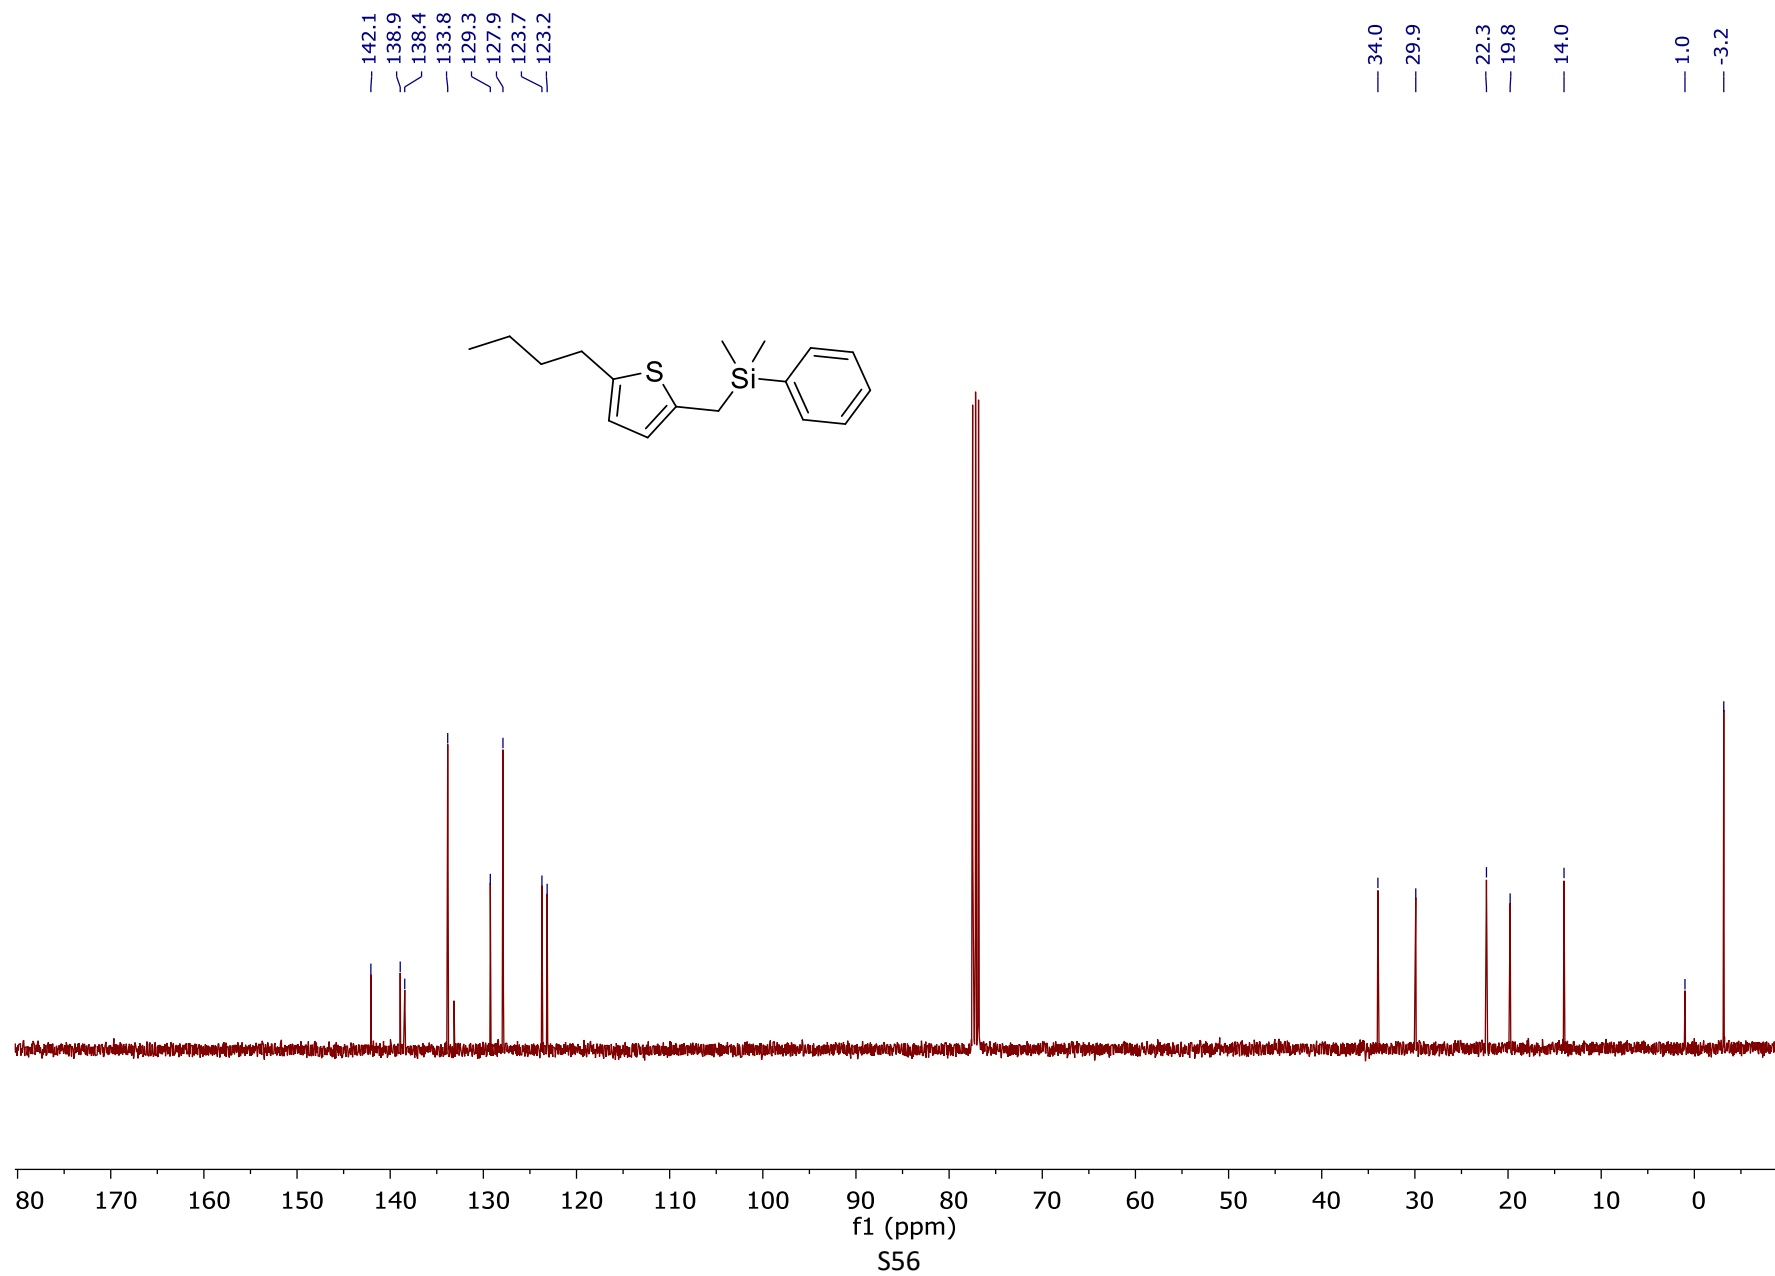



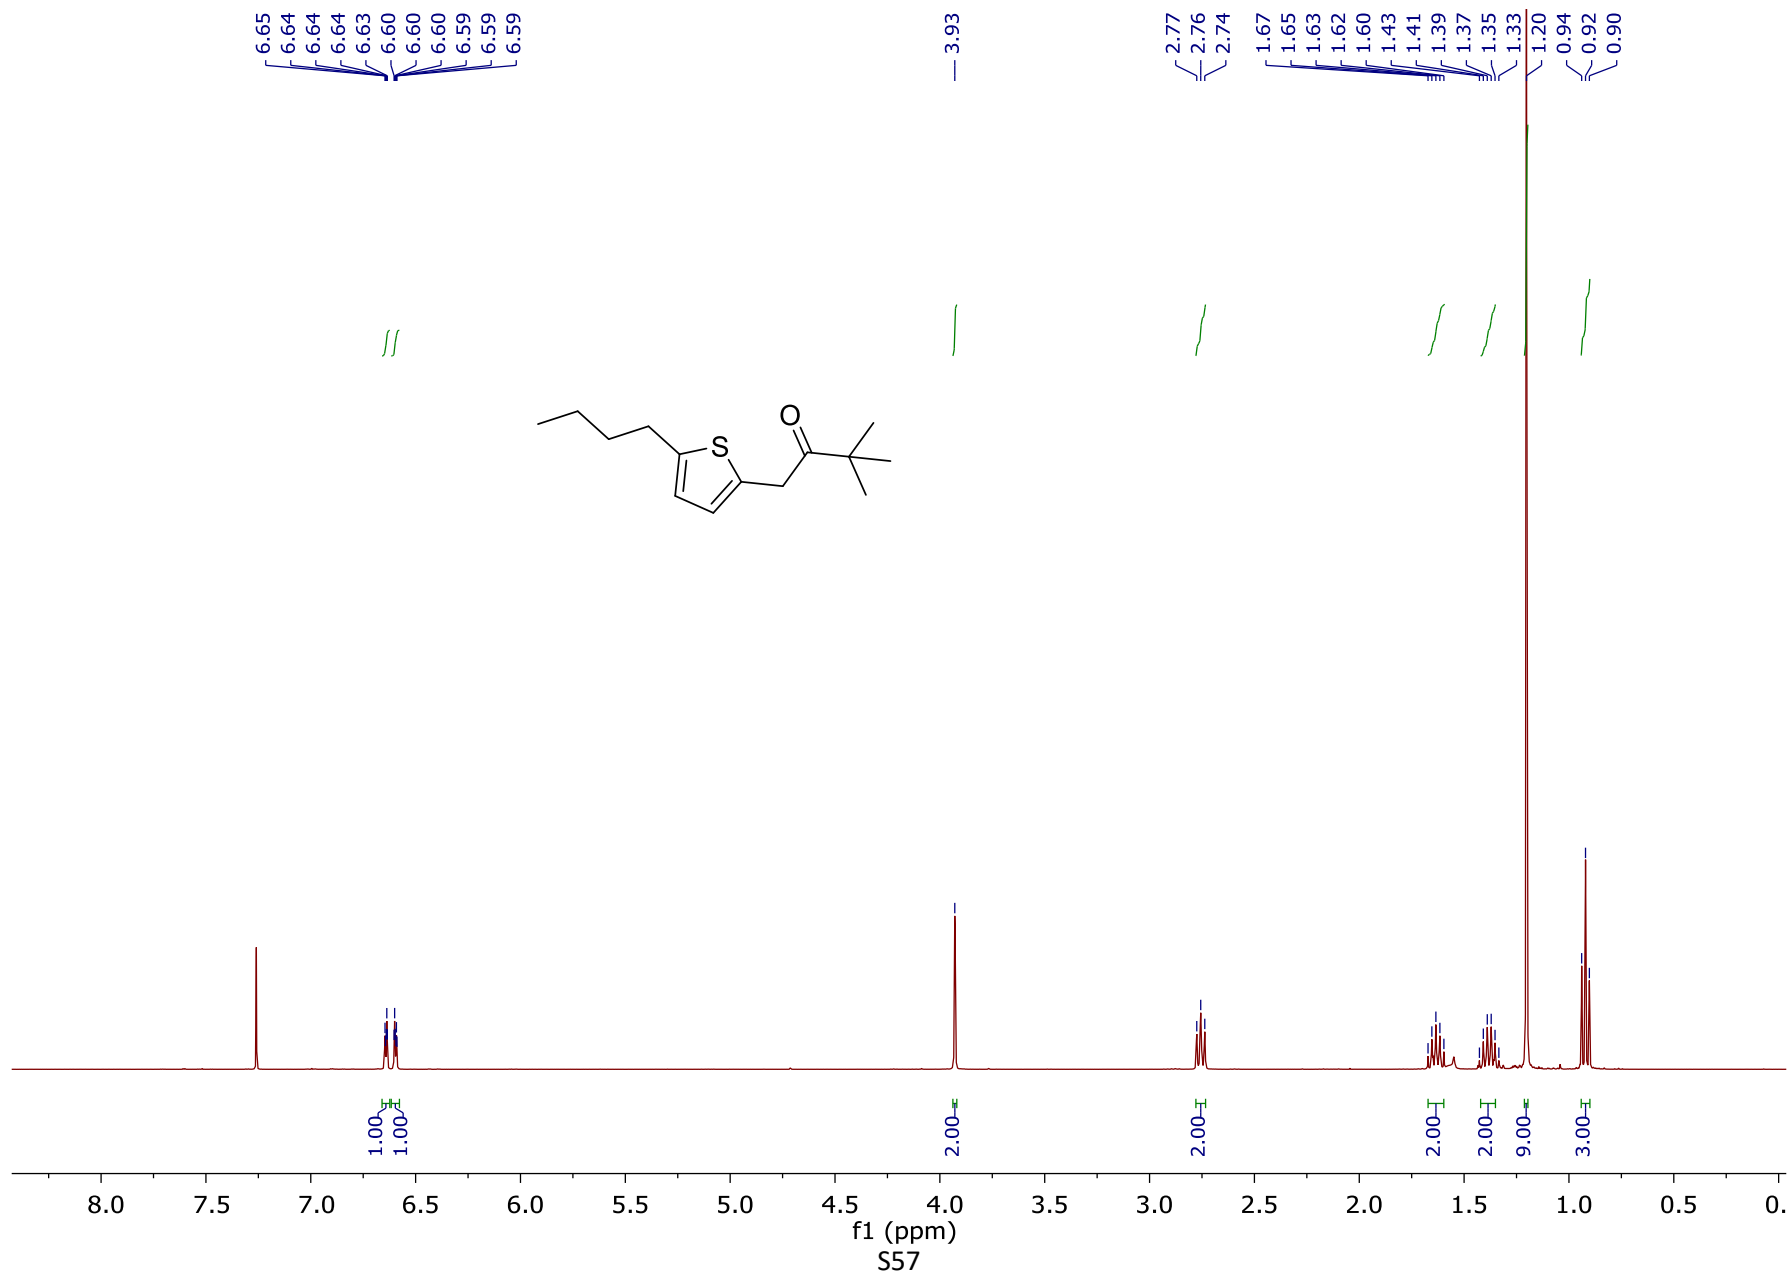

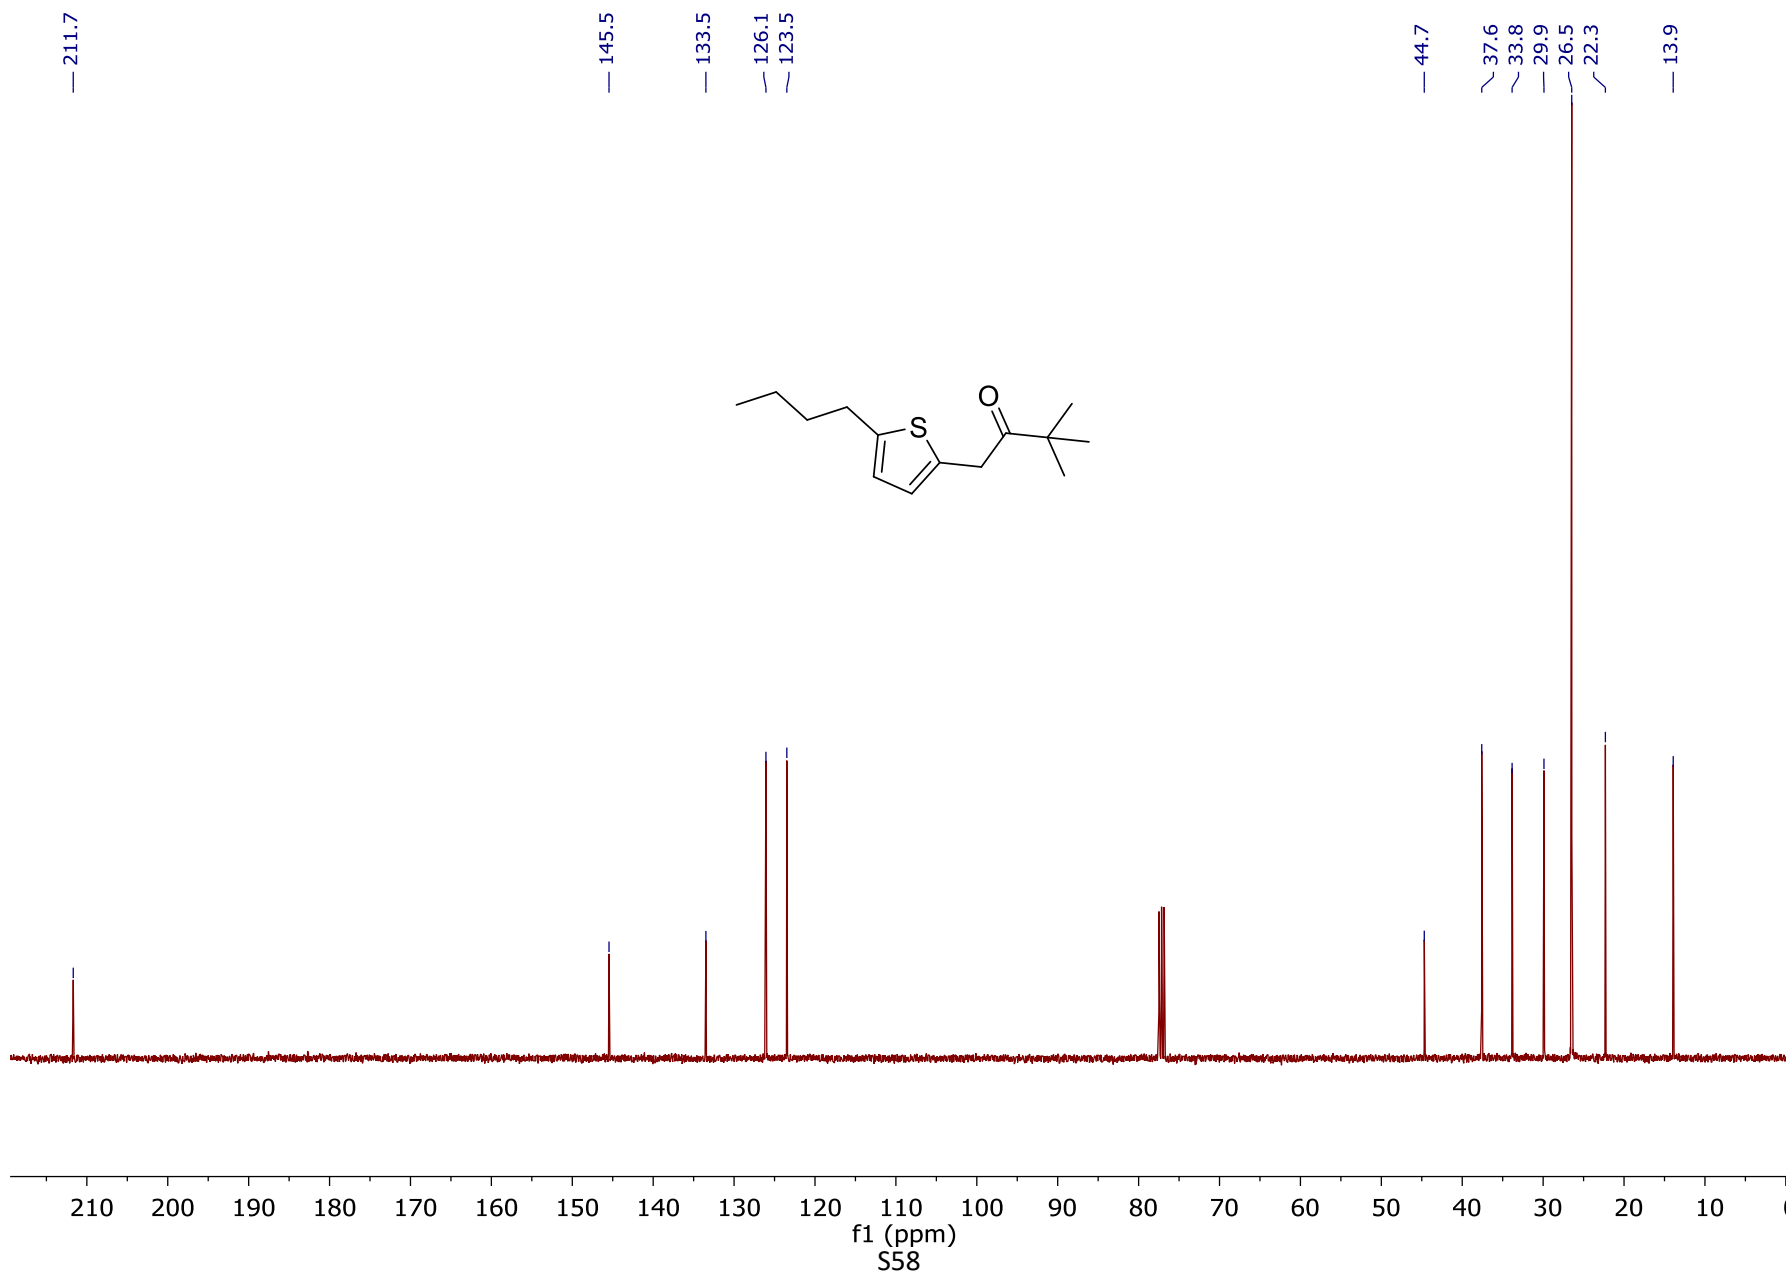

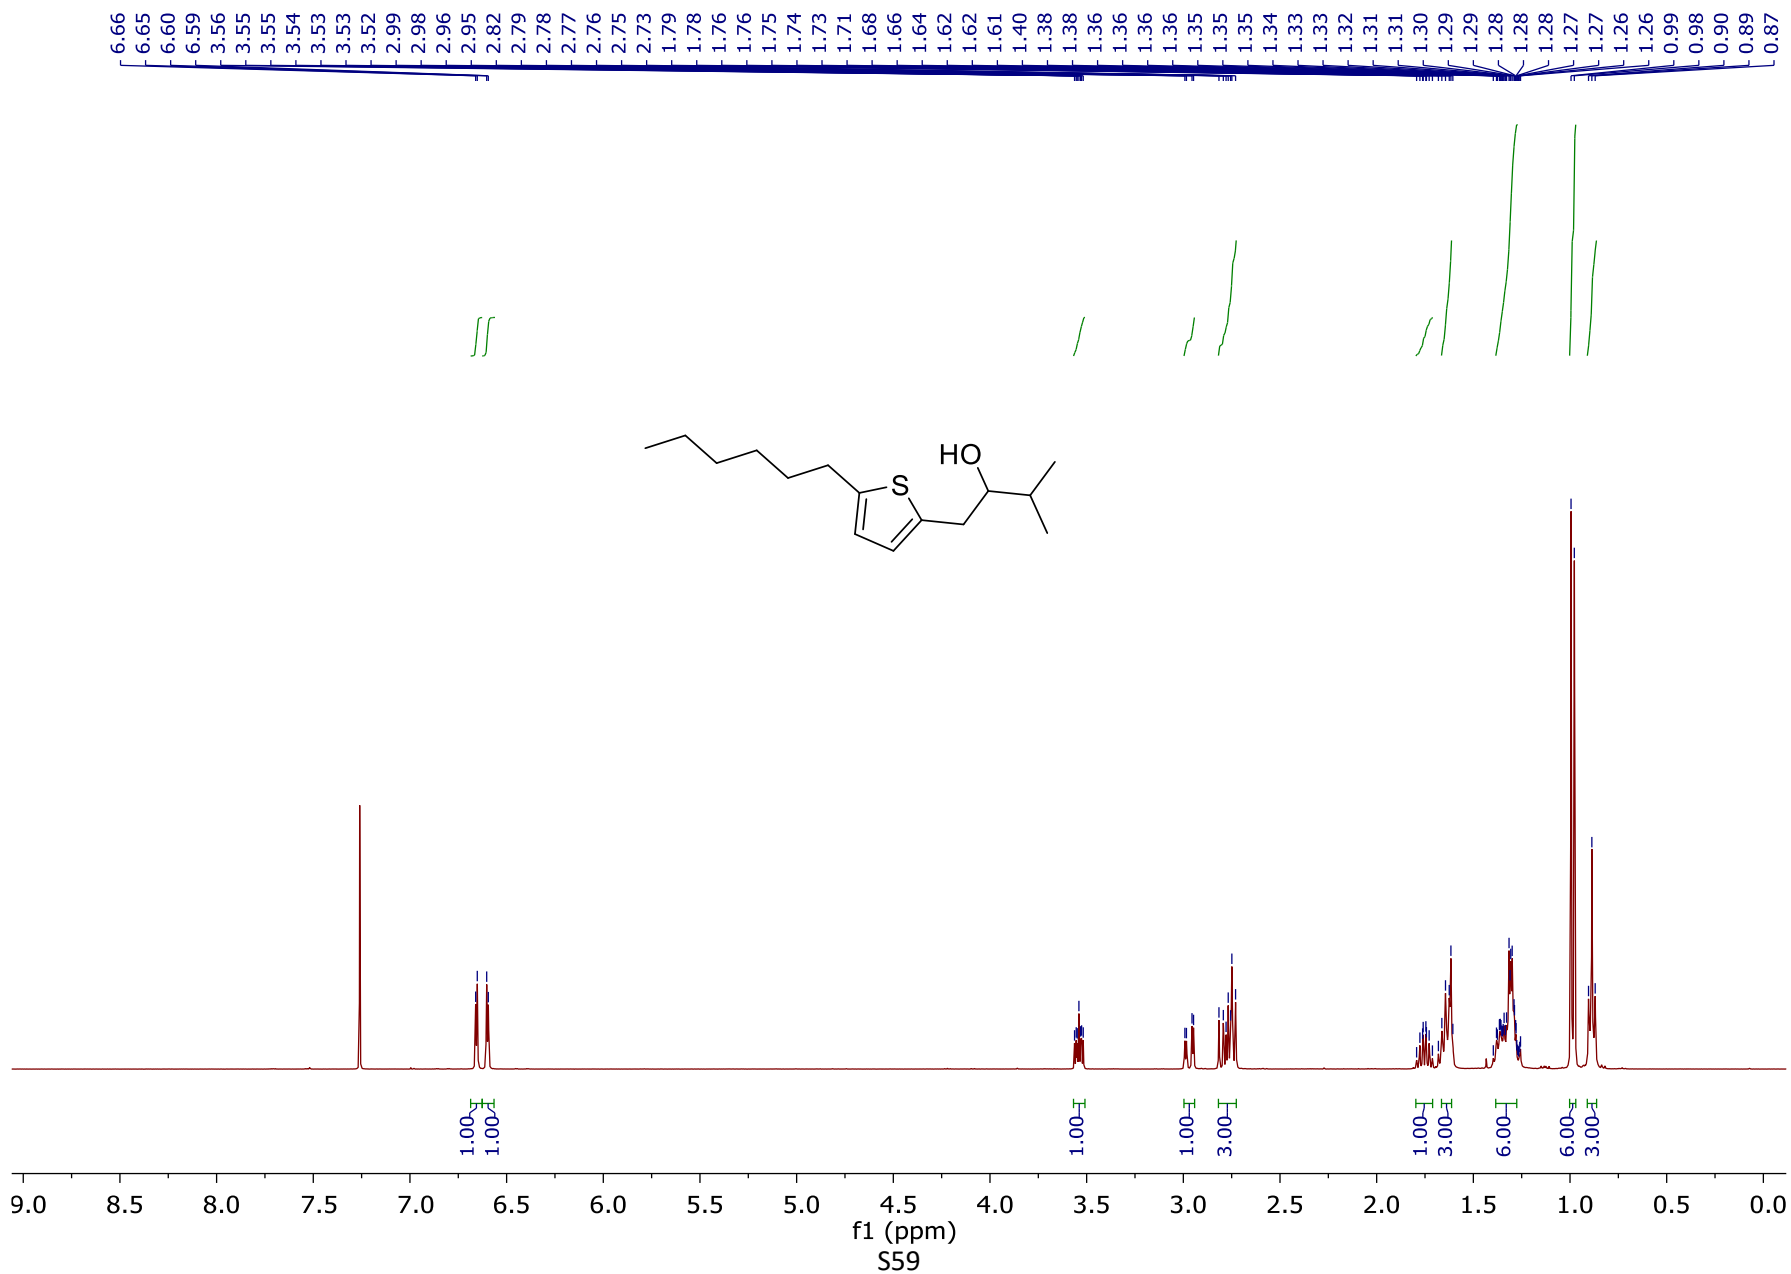

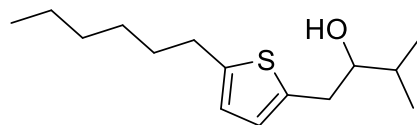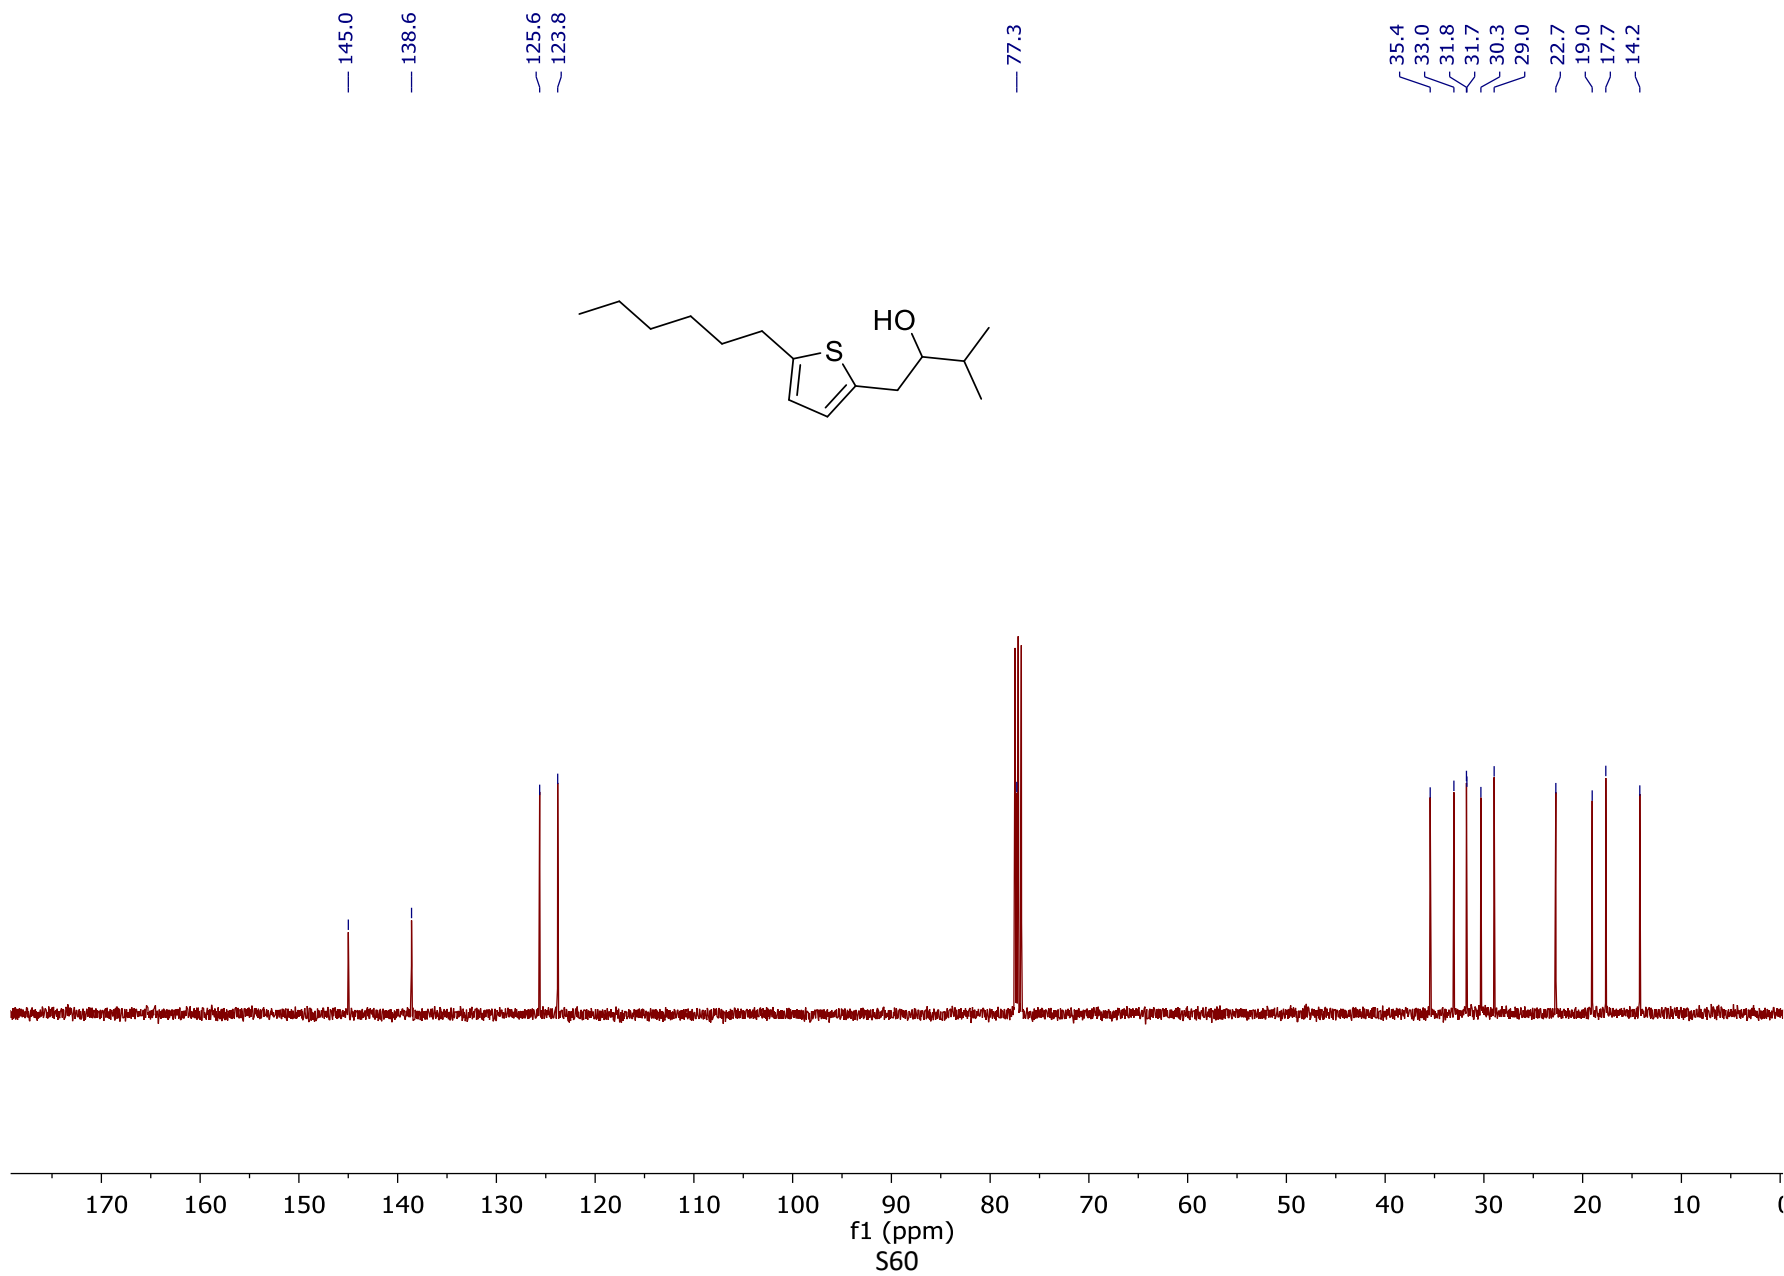

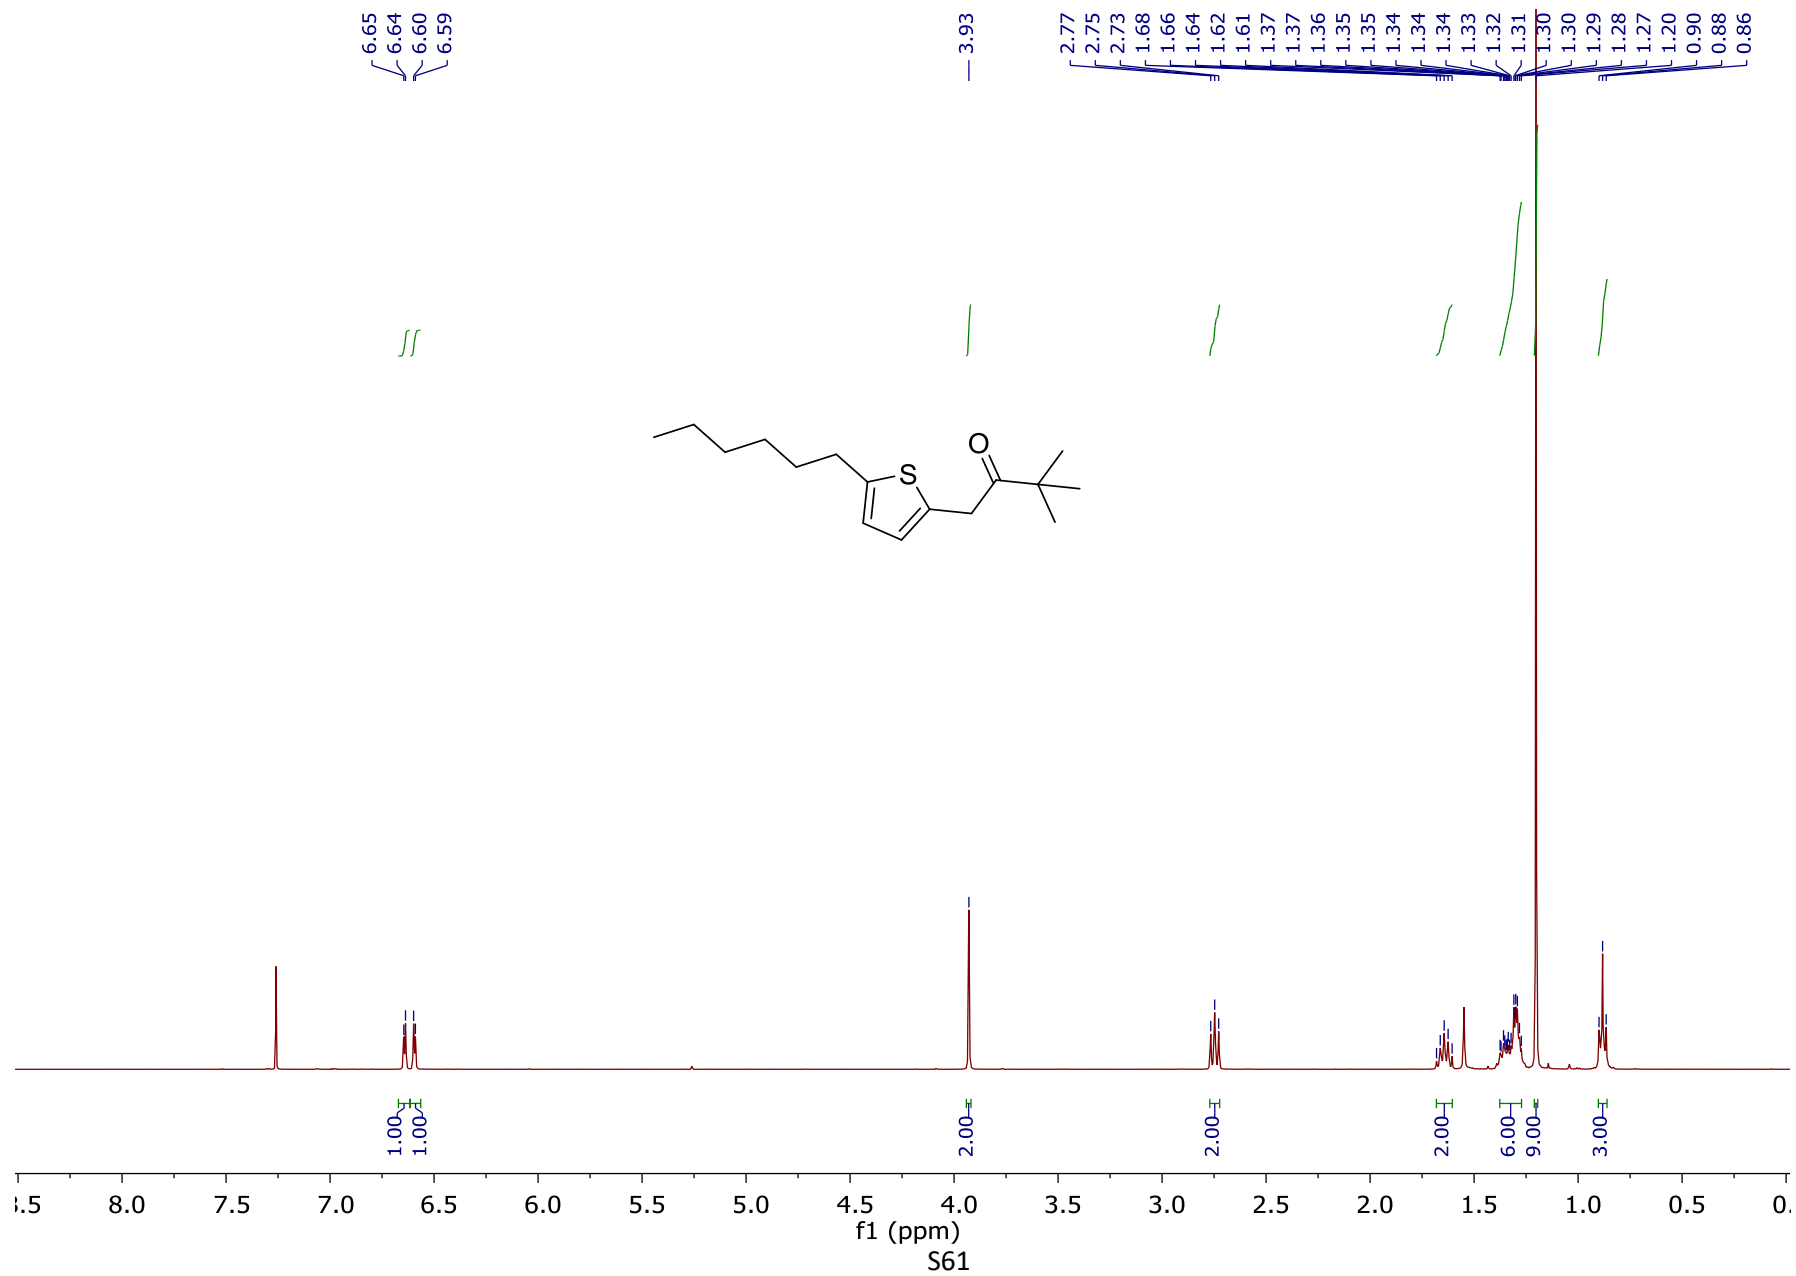

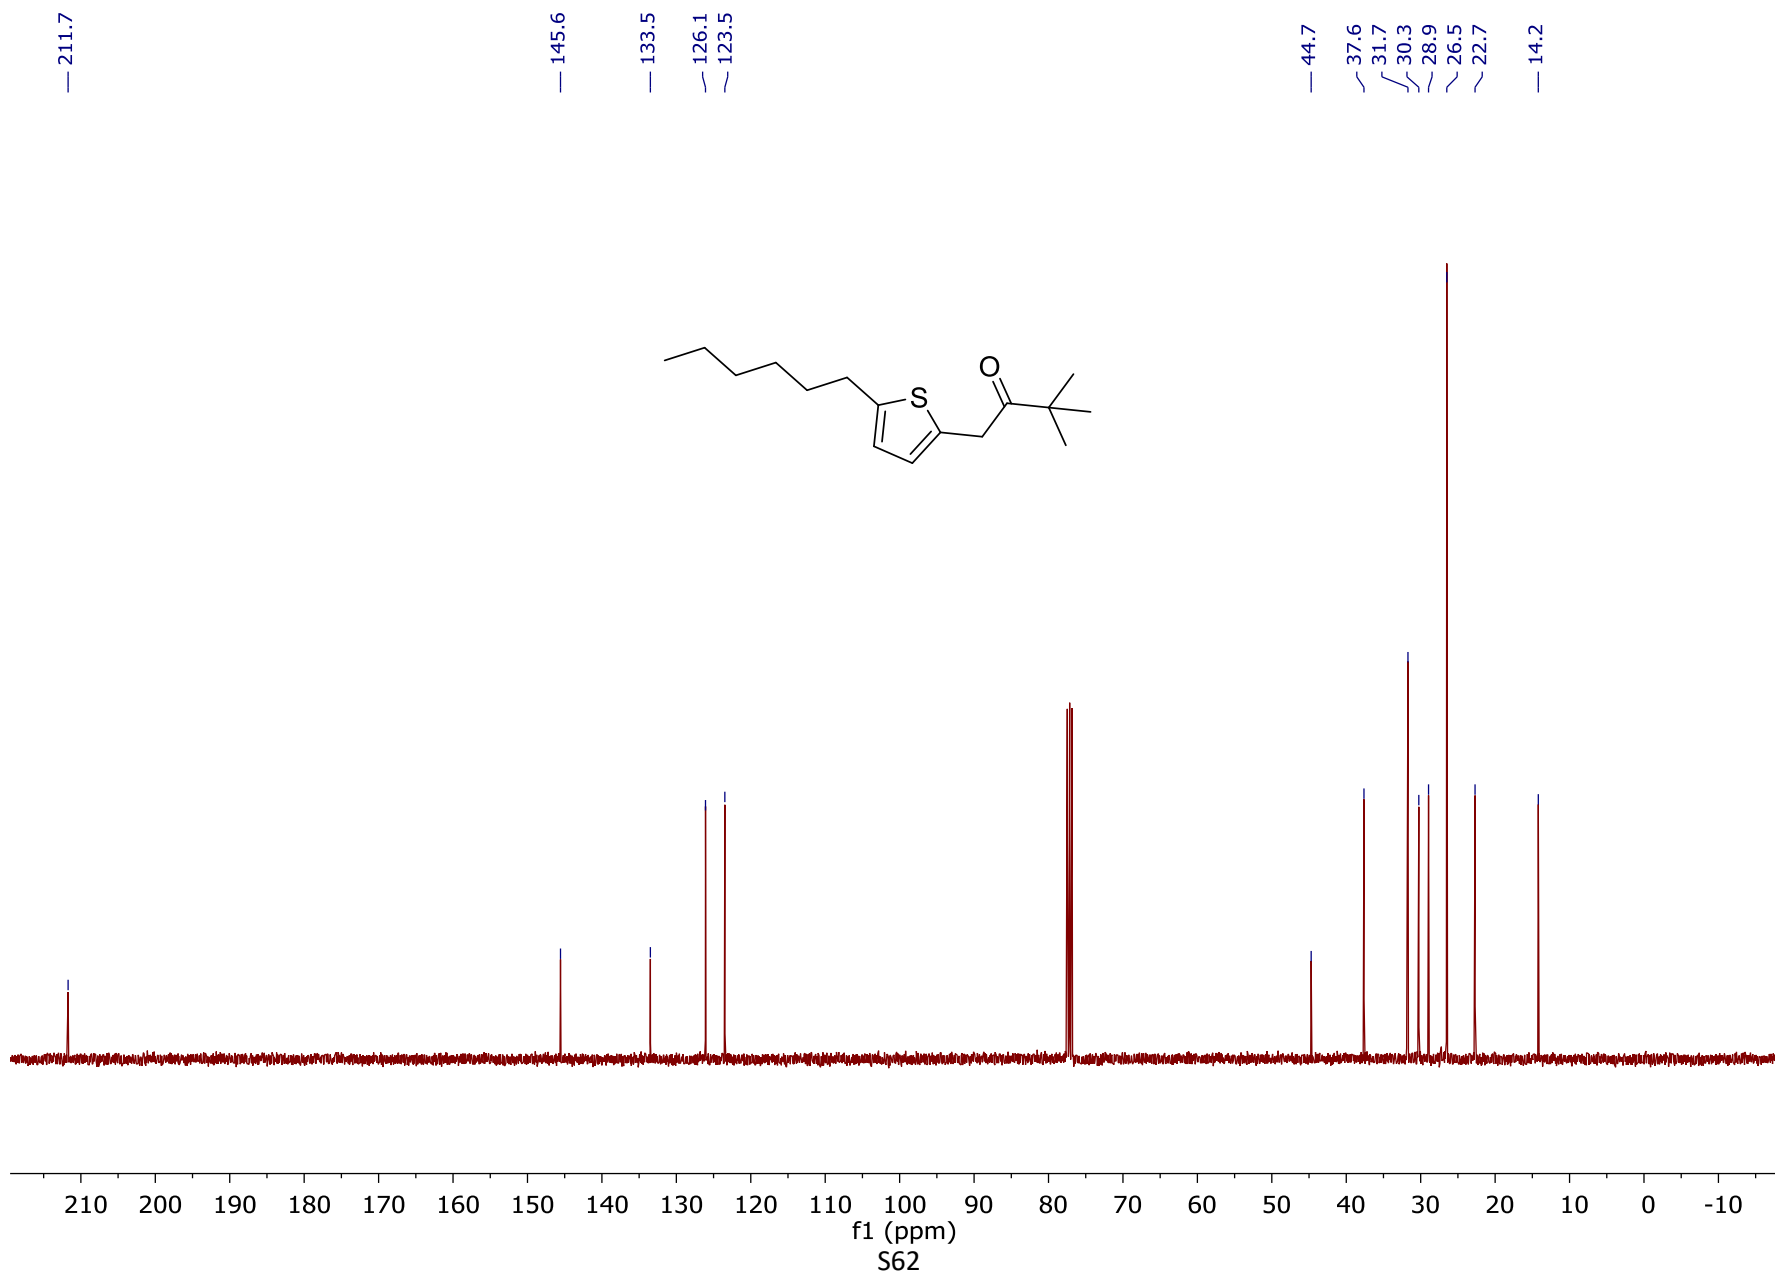

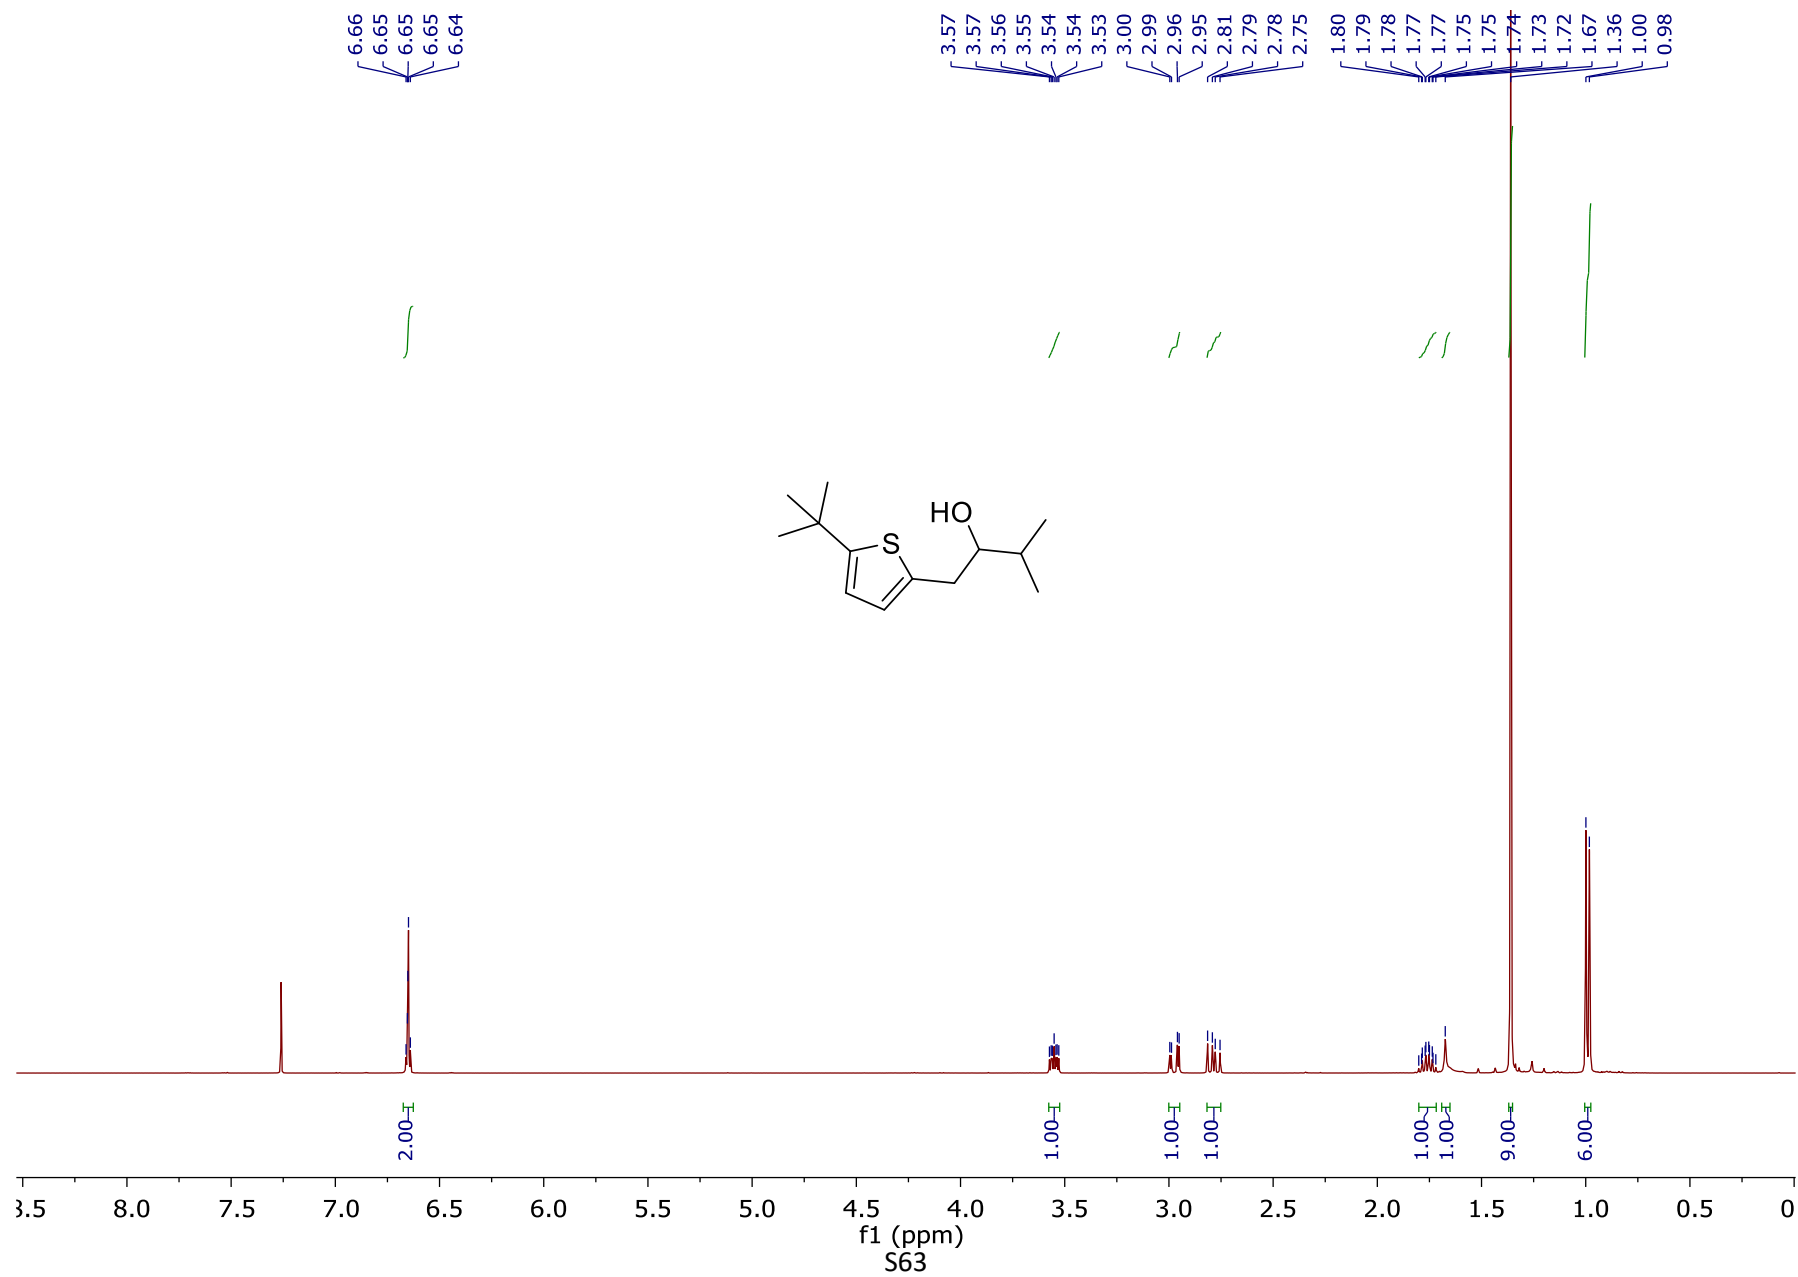

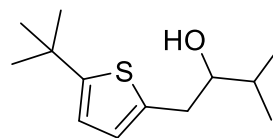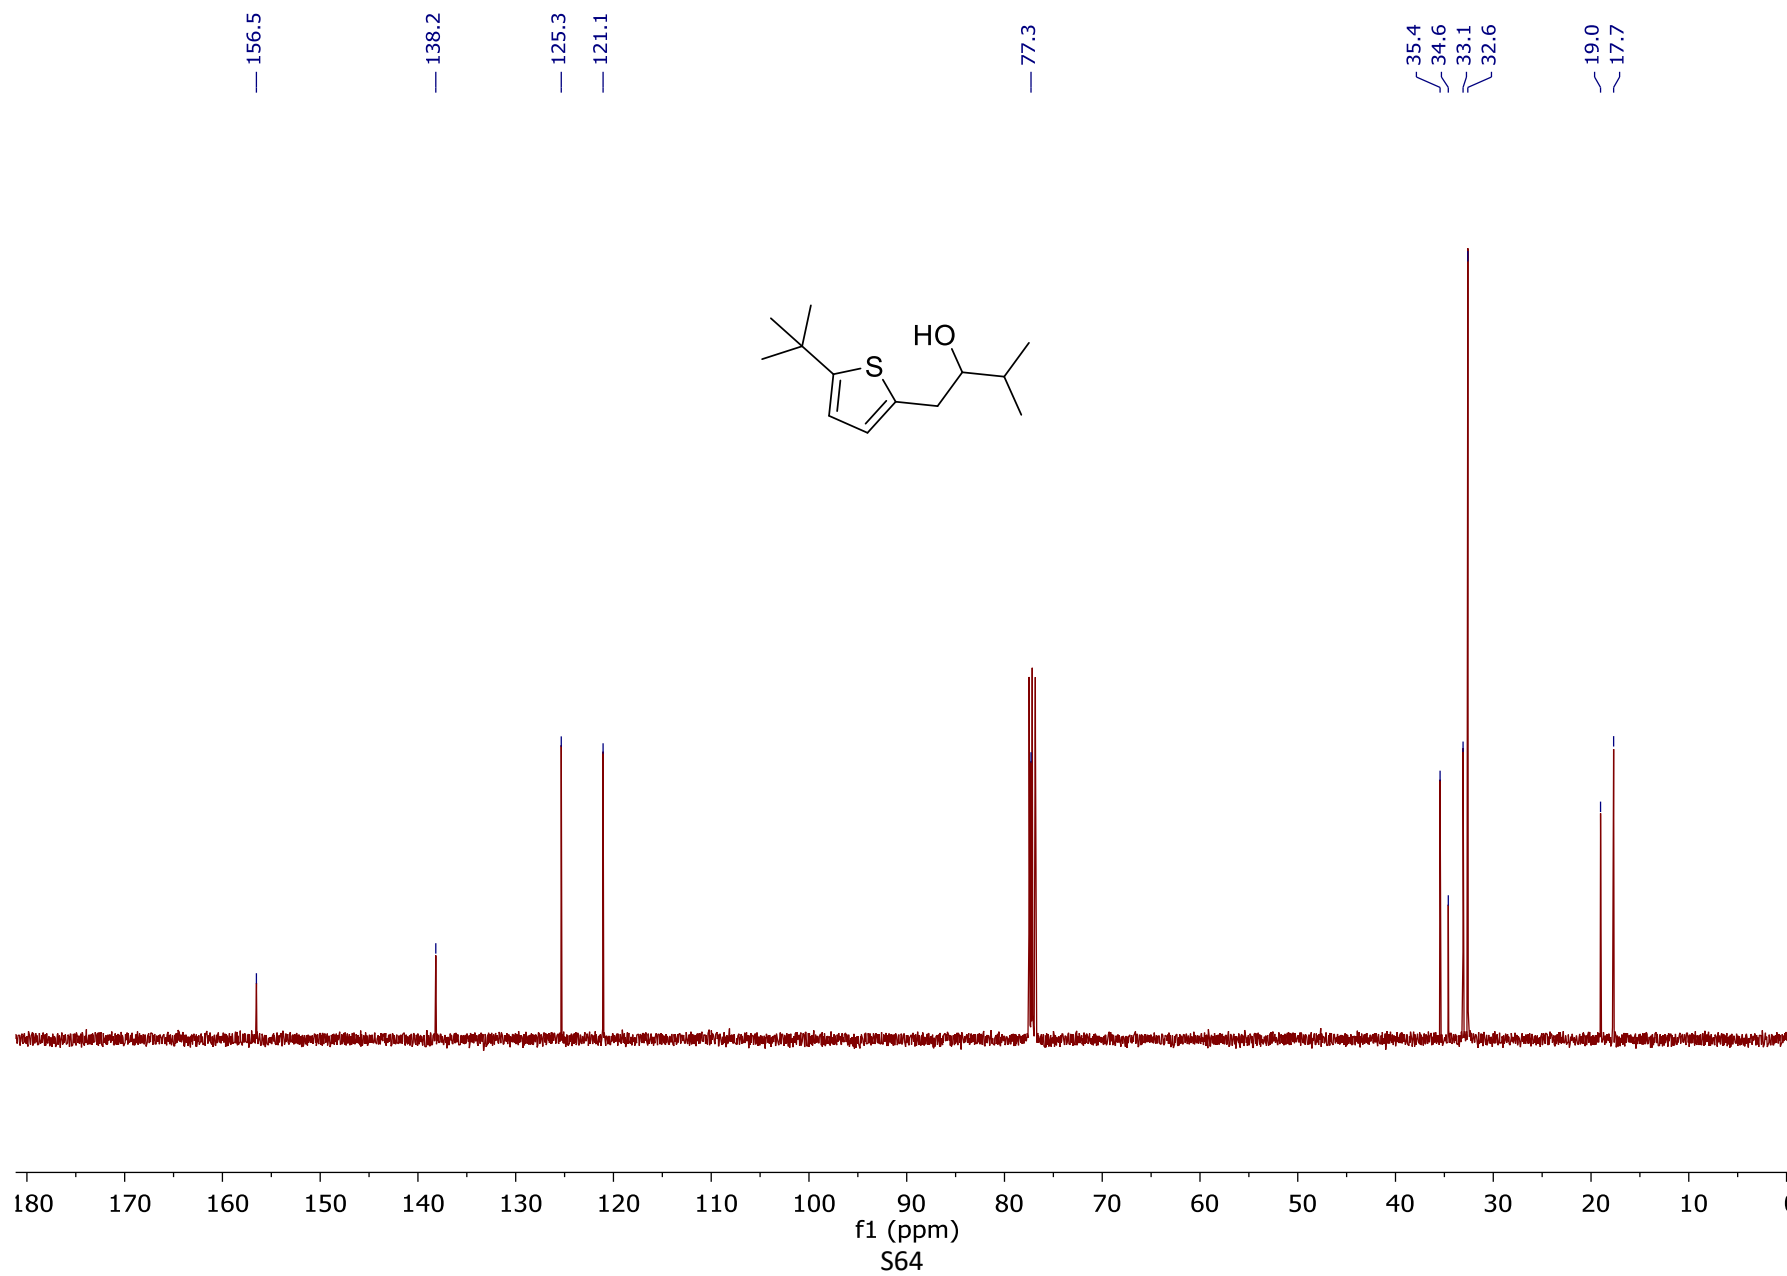



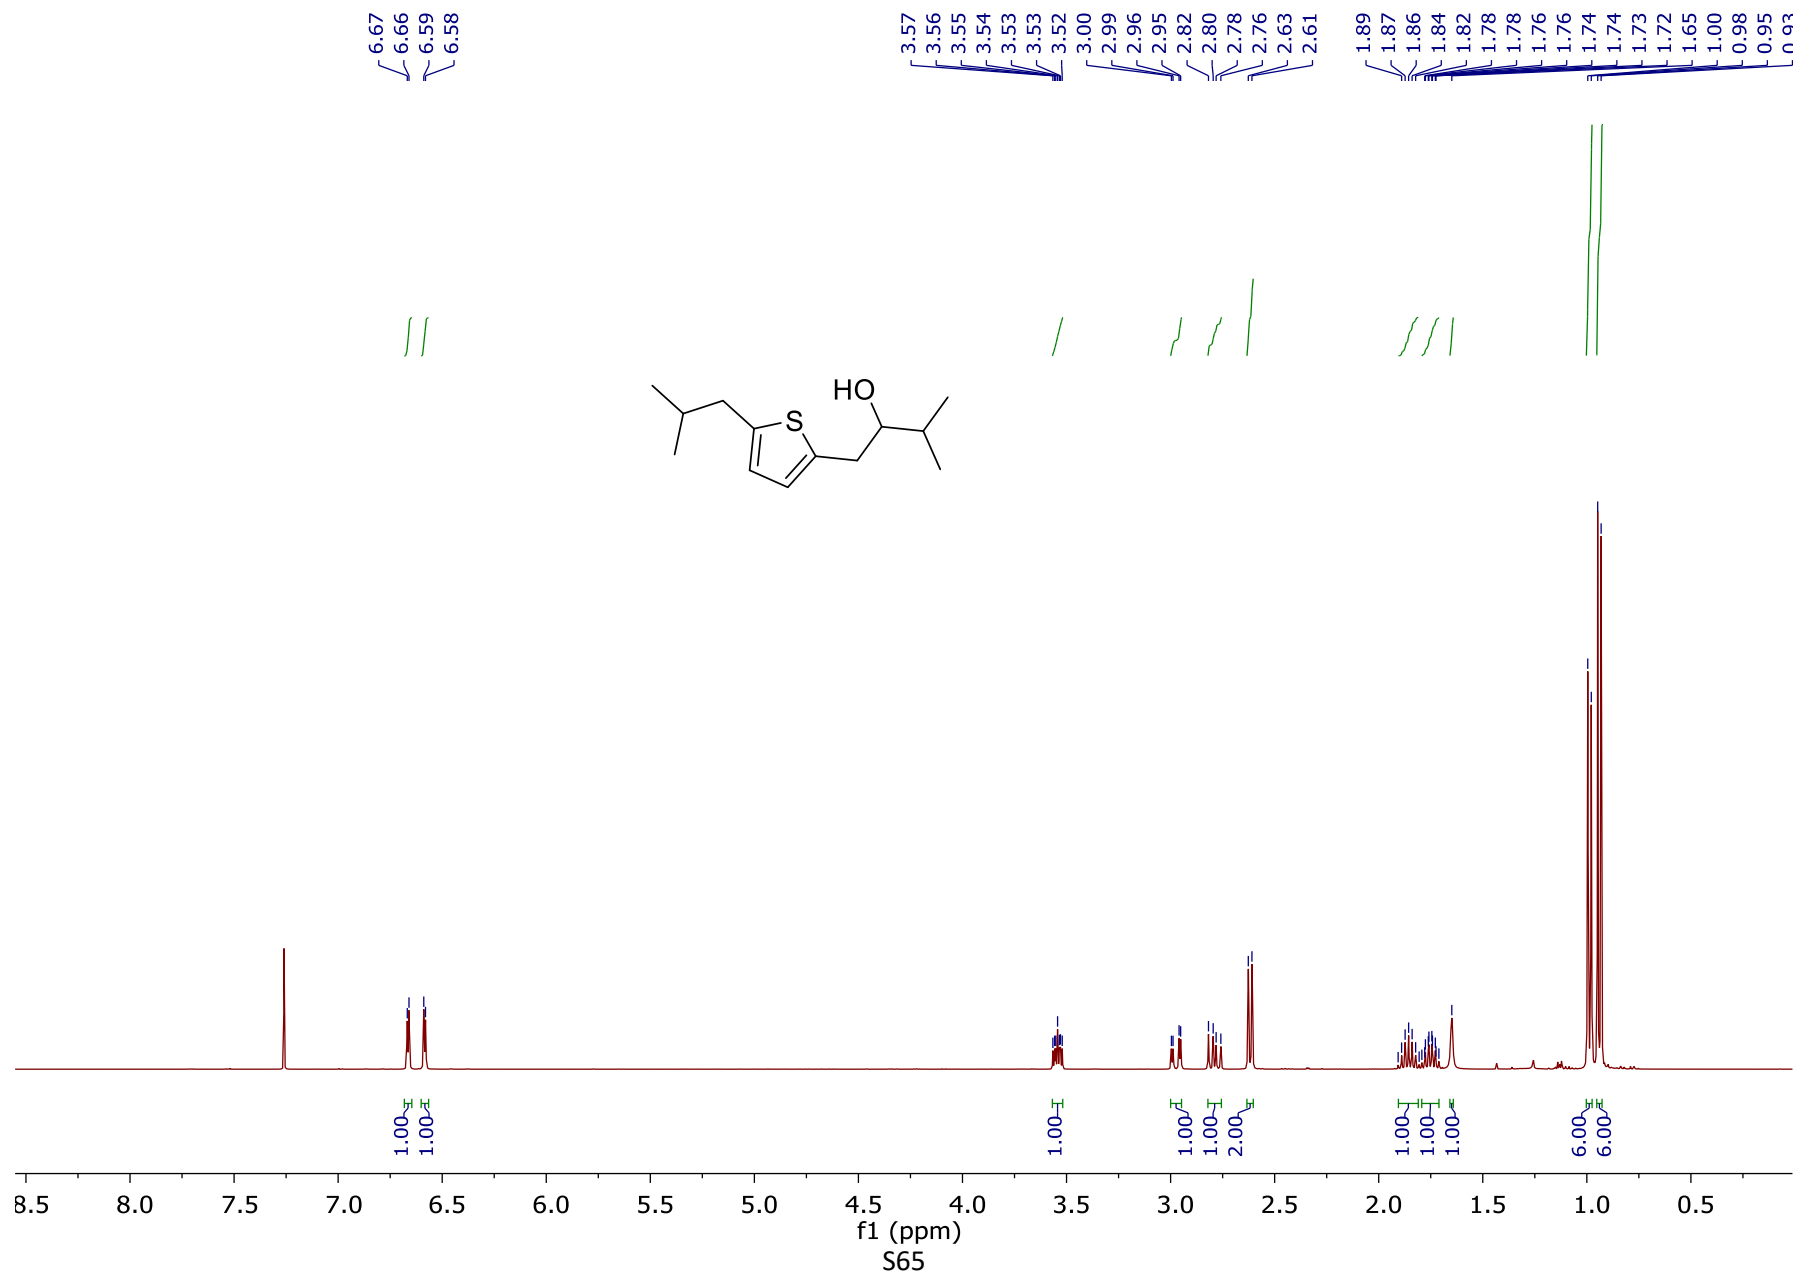

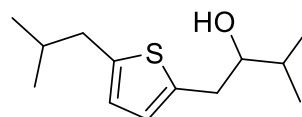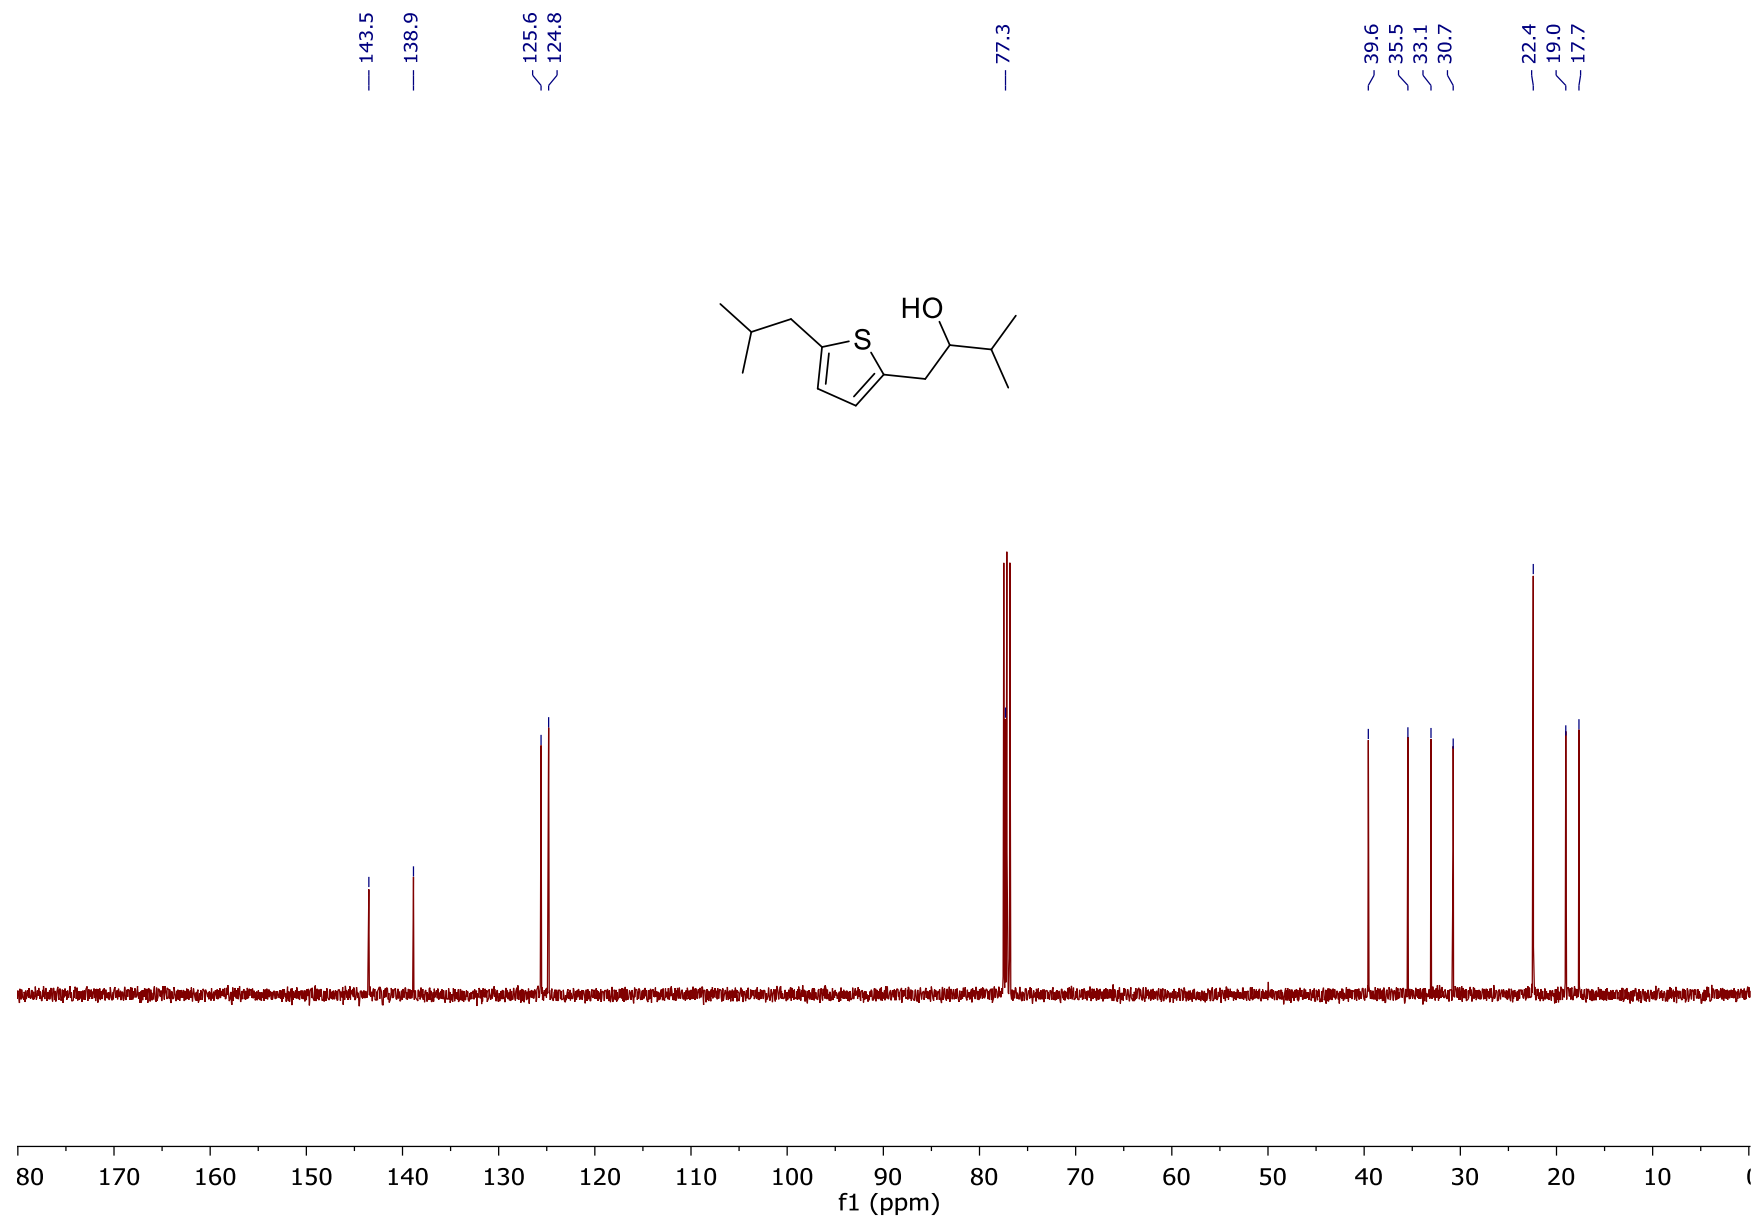

S66

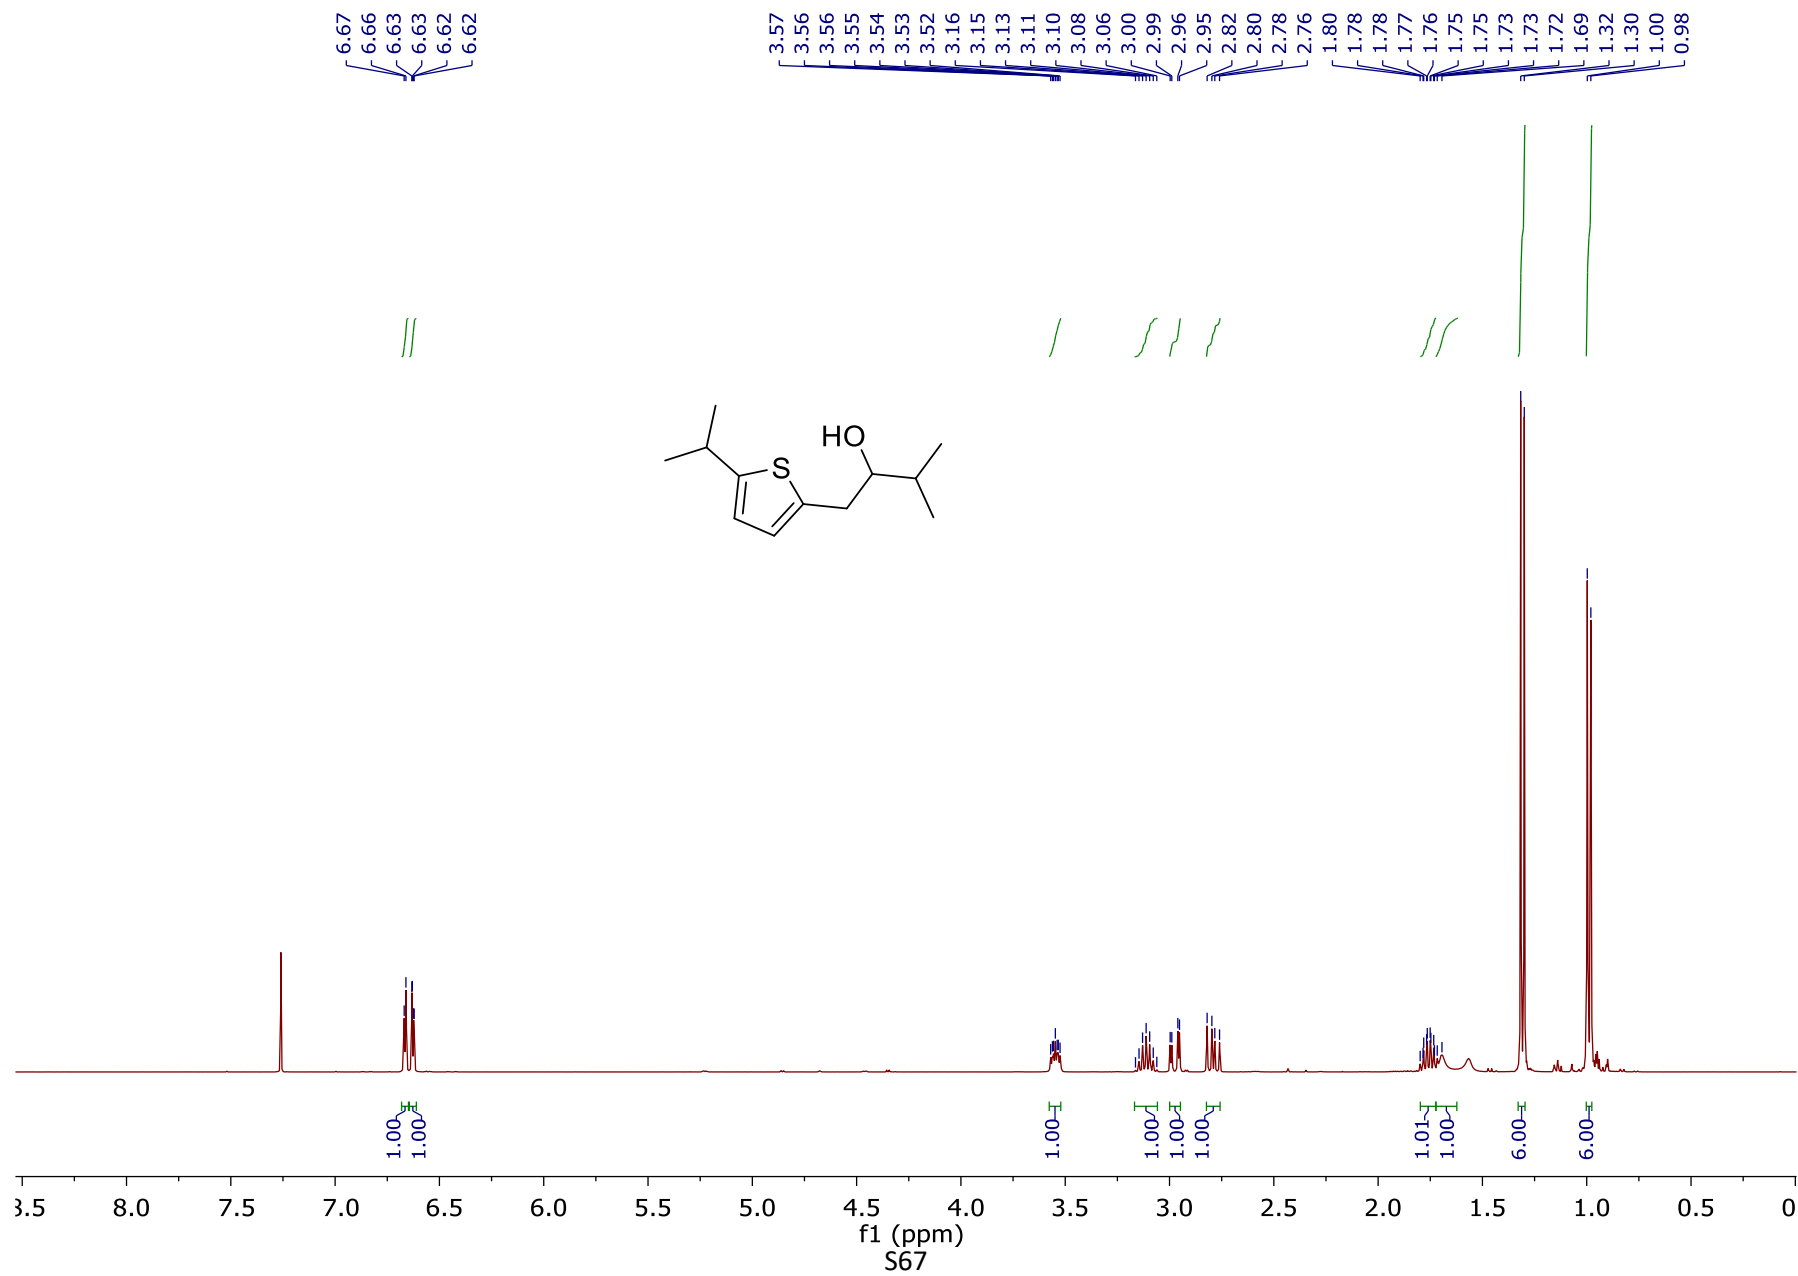

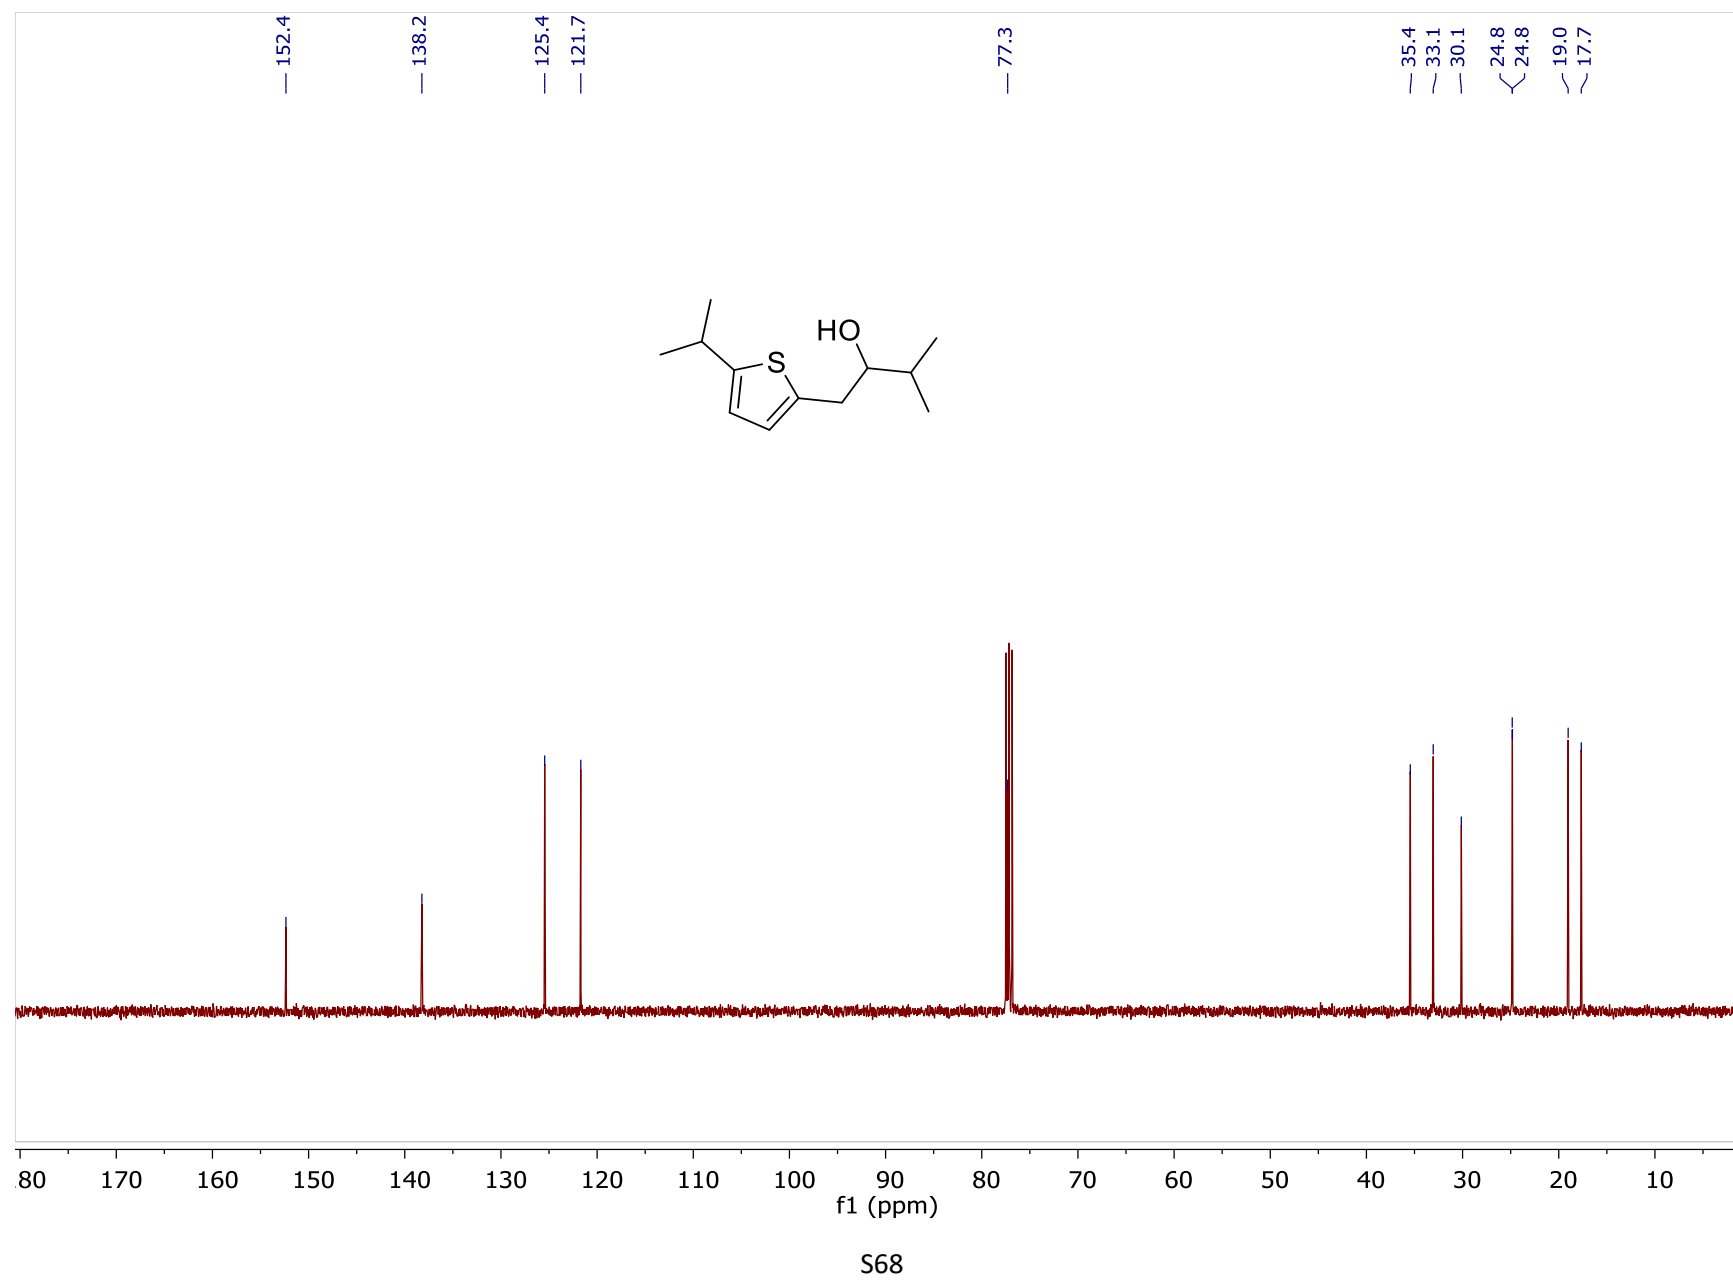

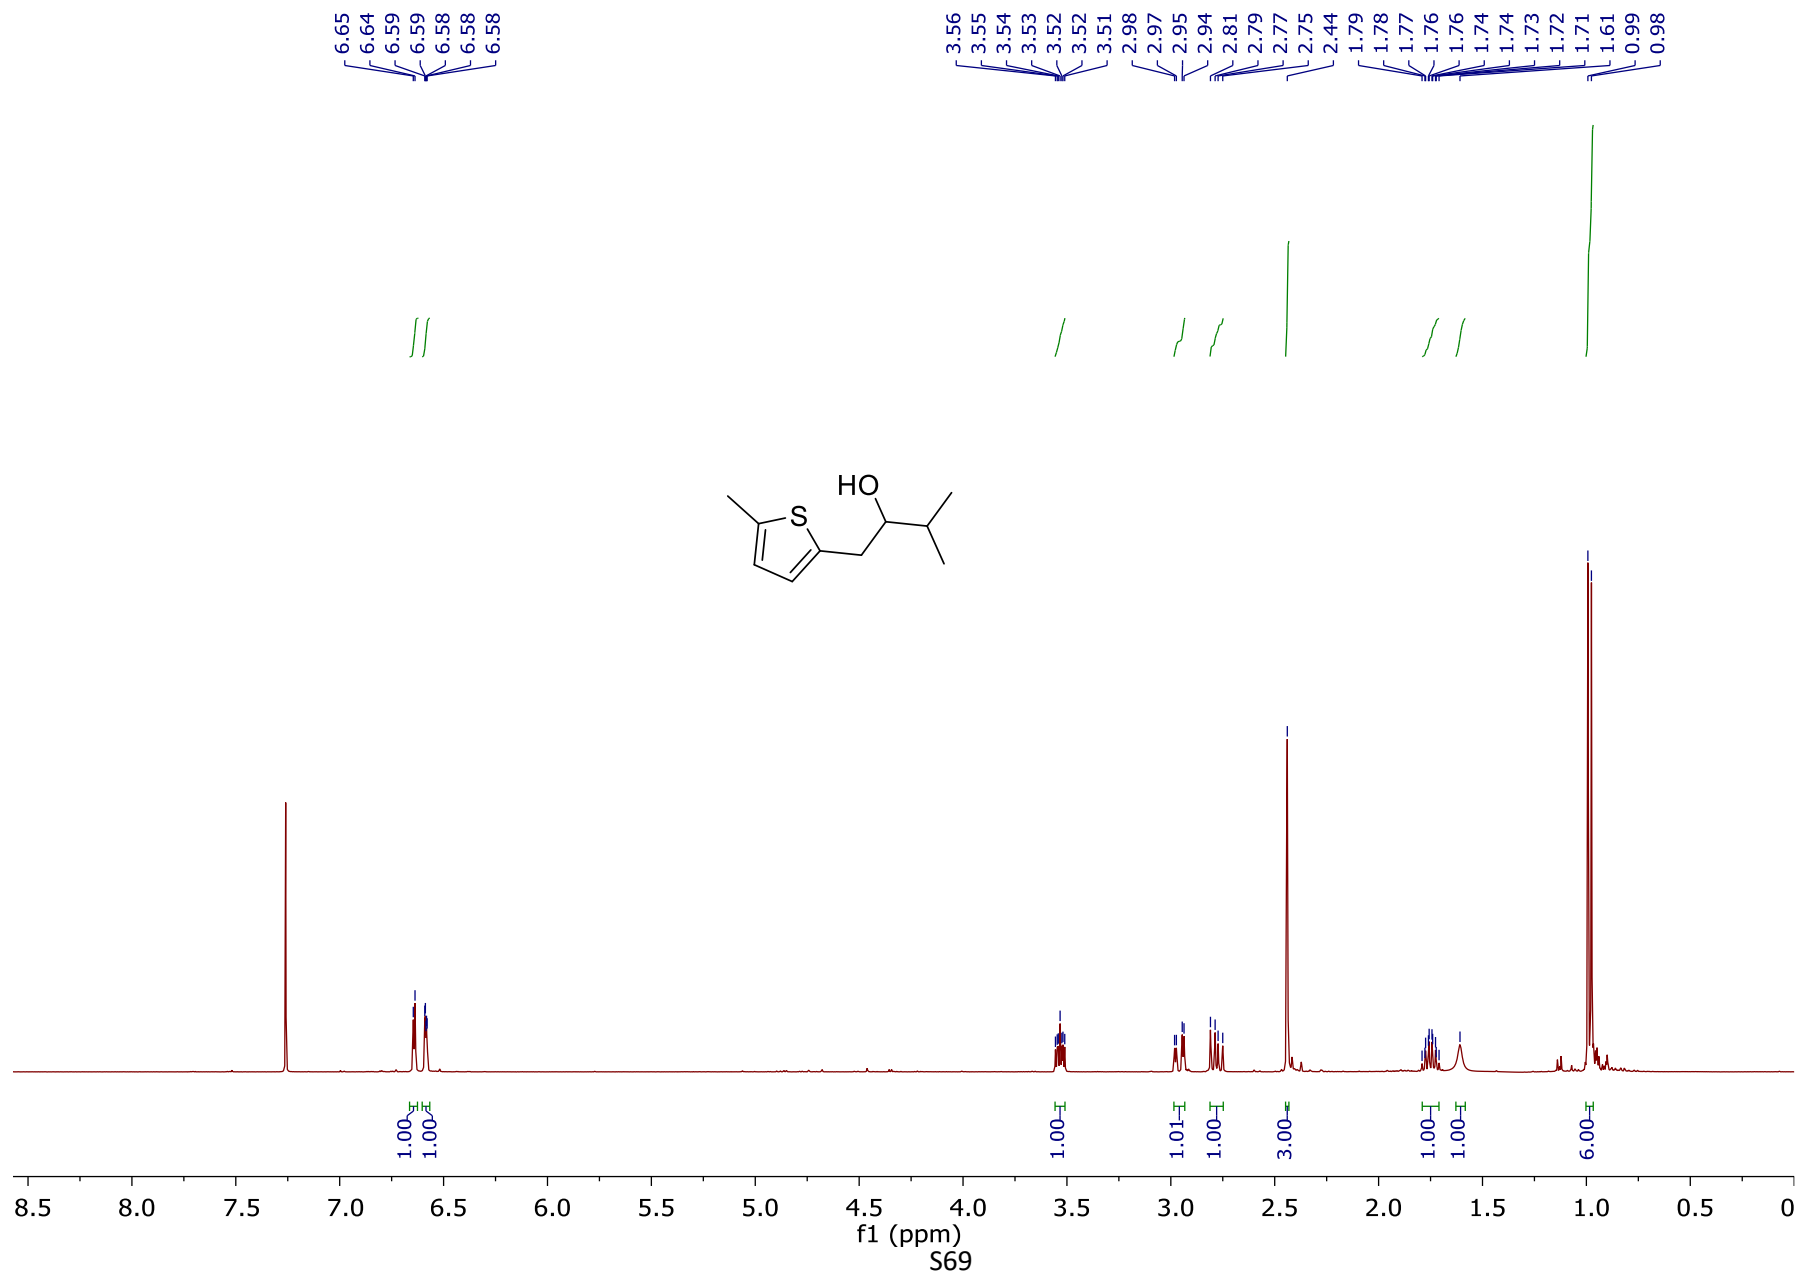

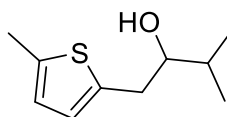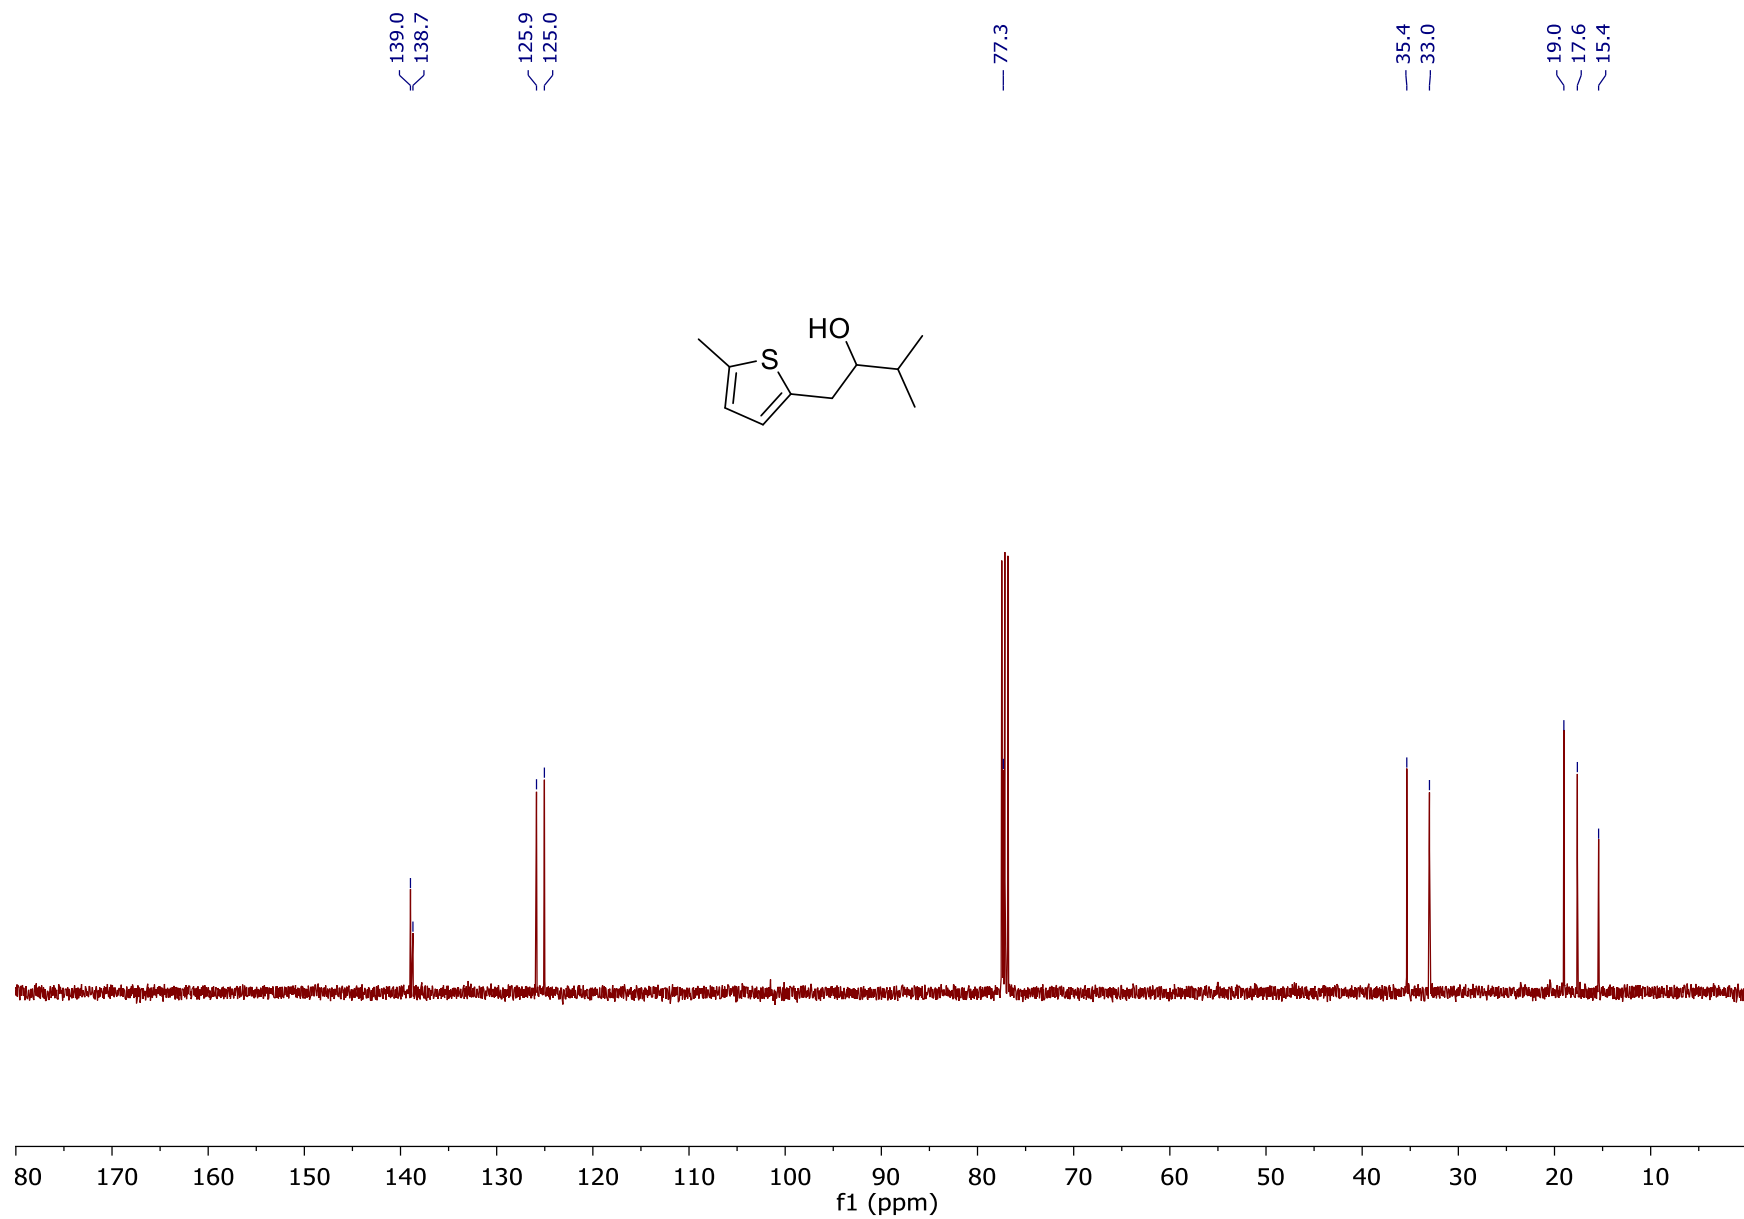

S70

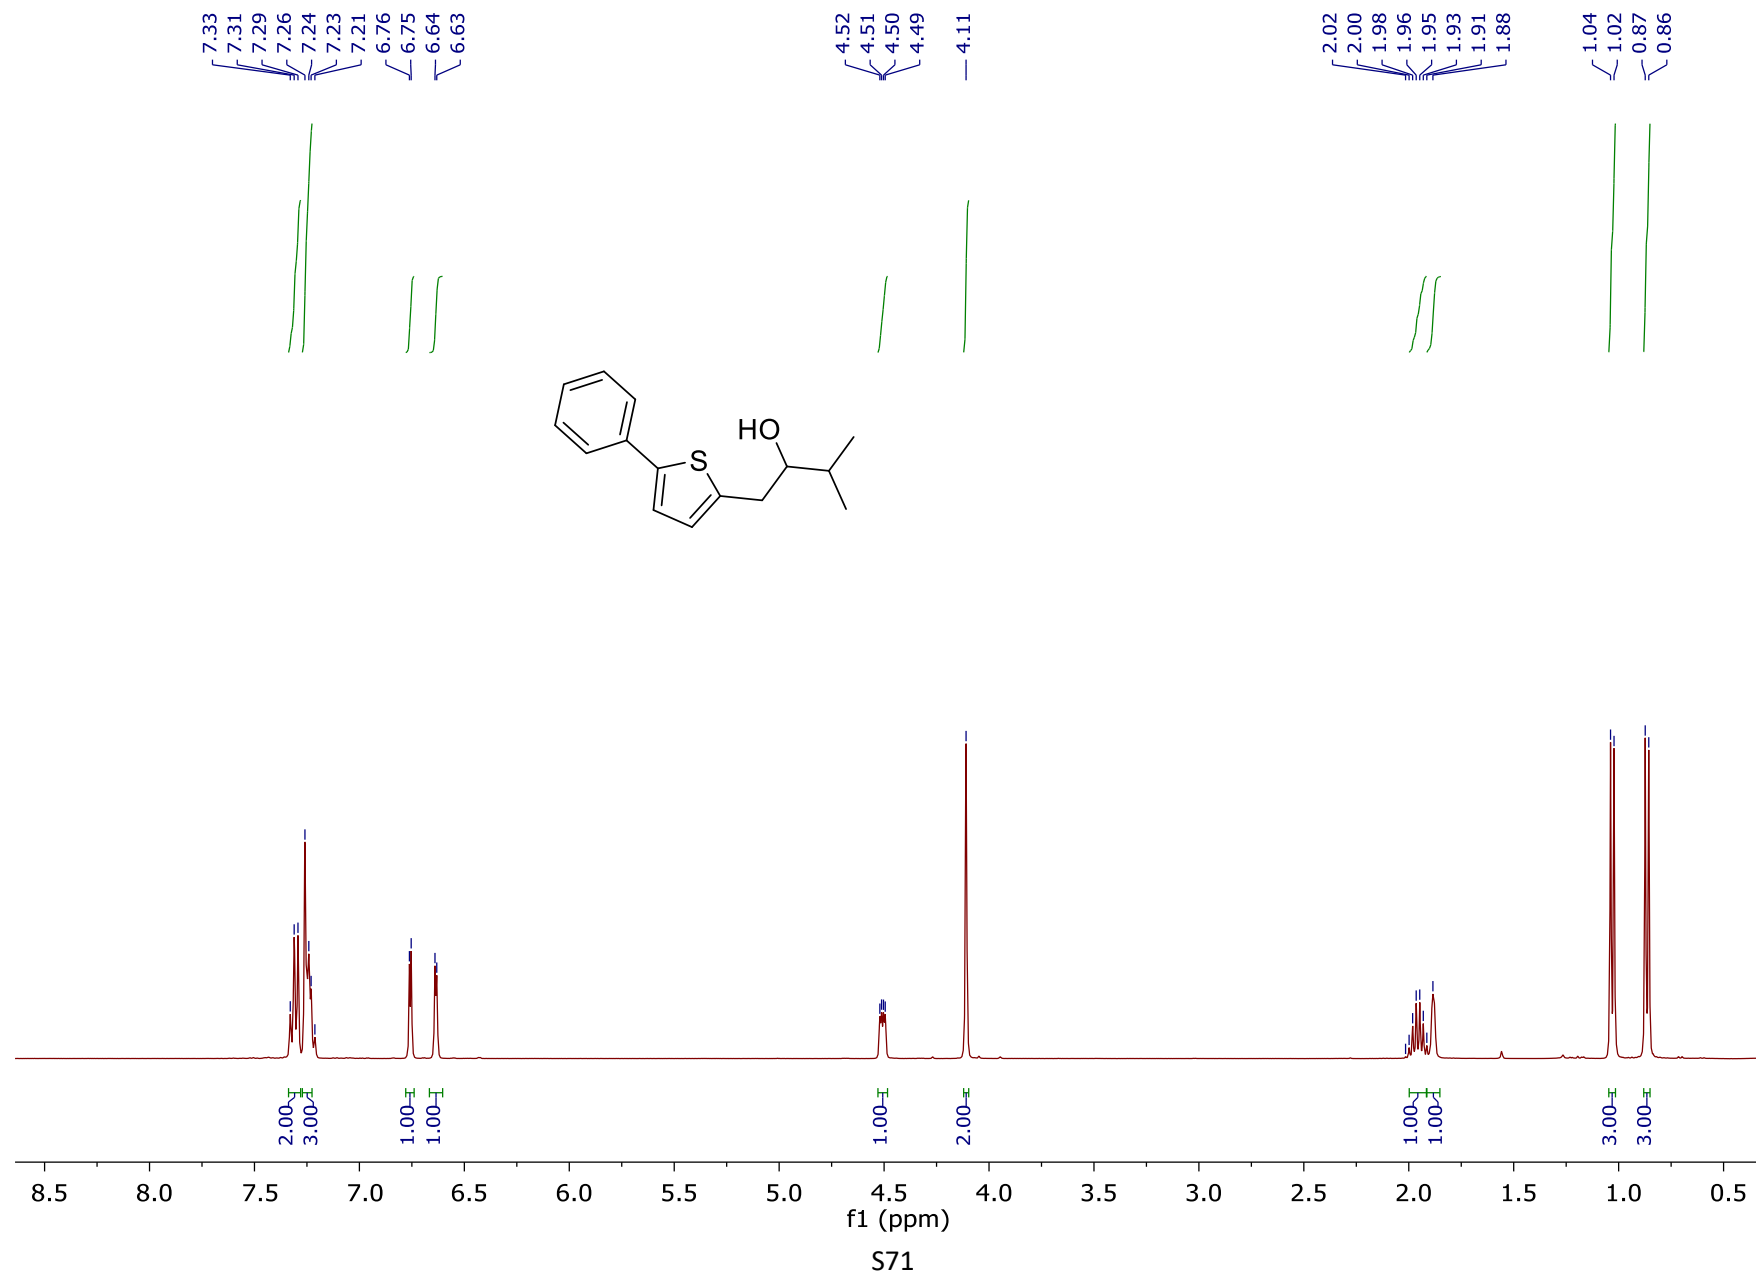

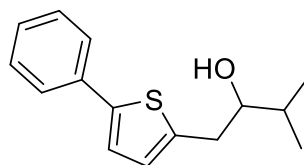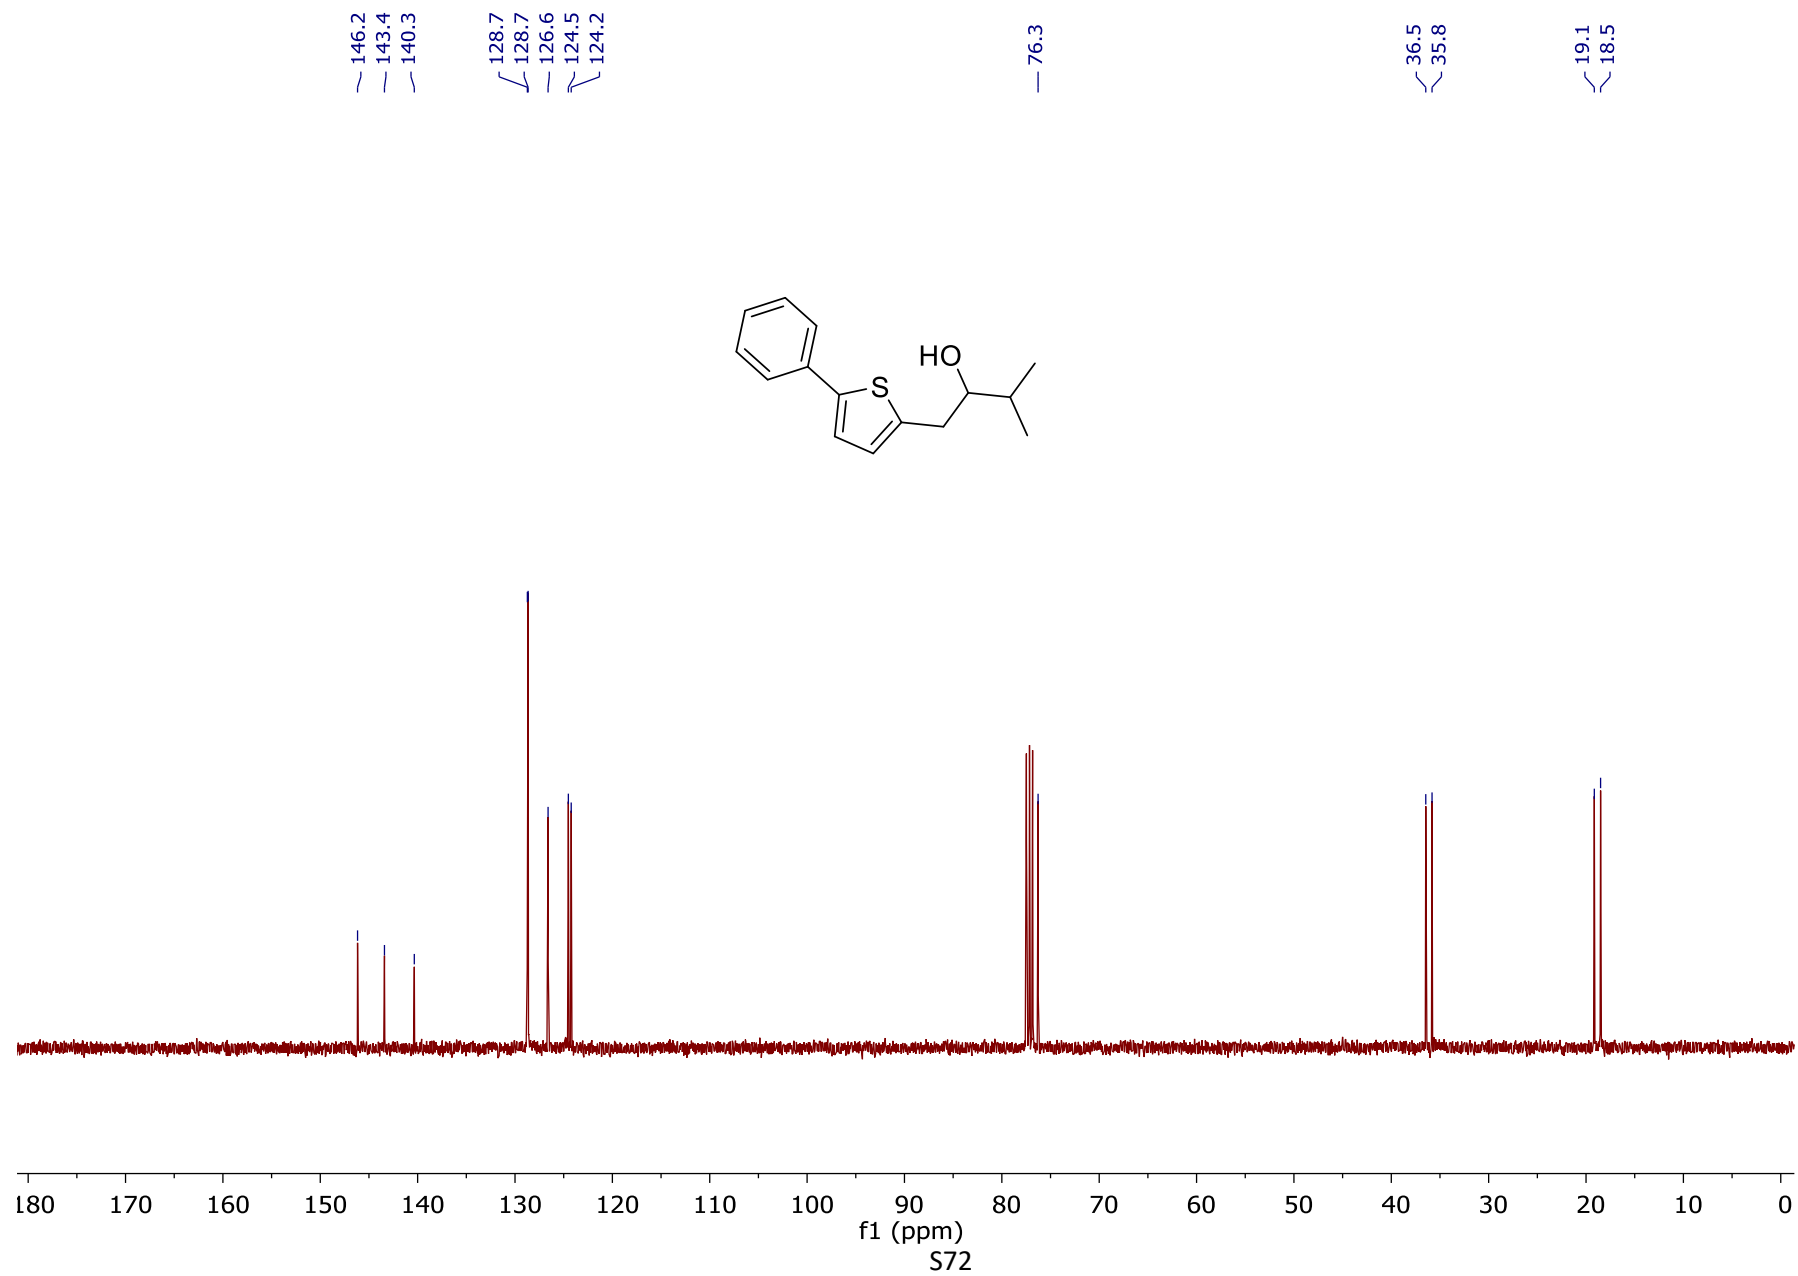



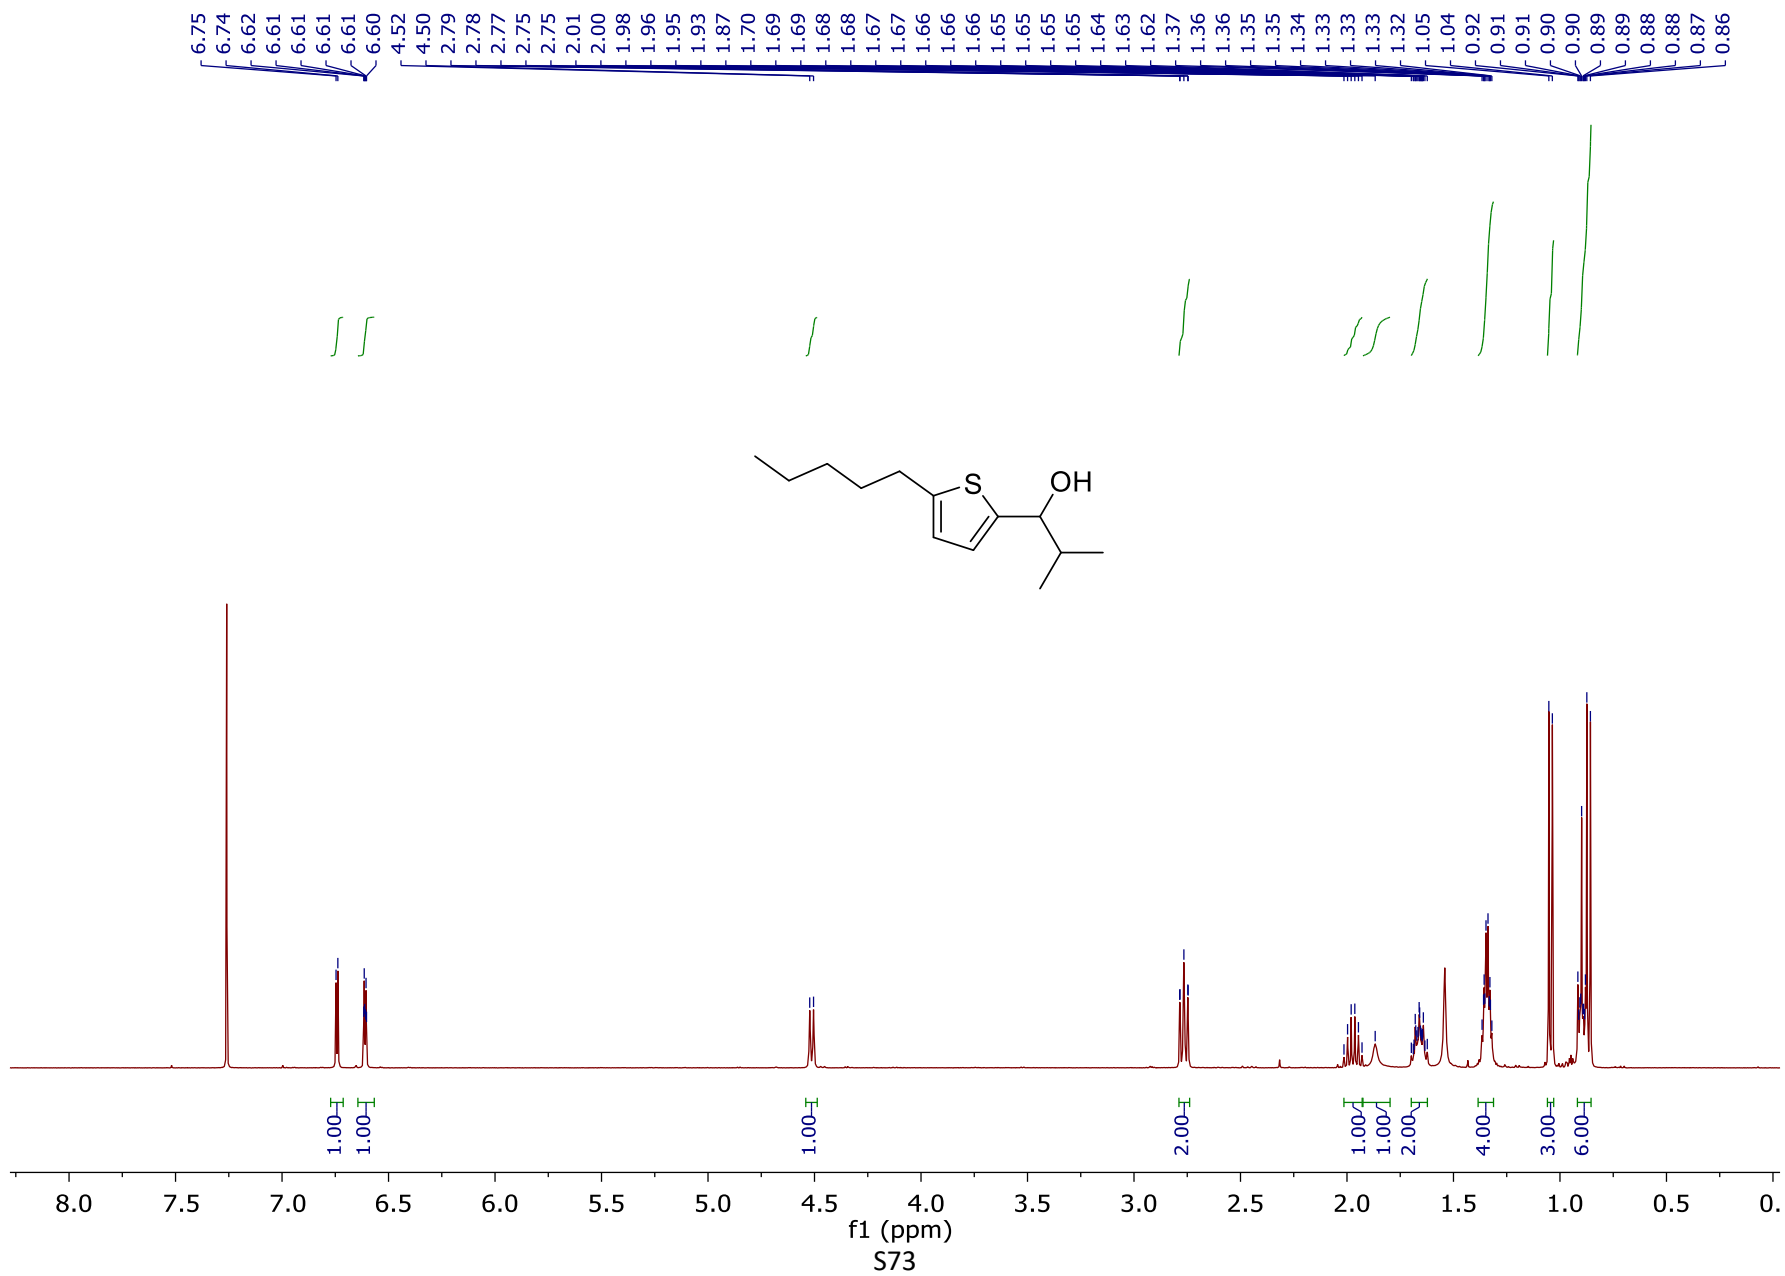

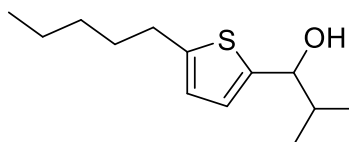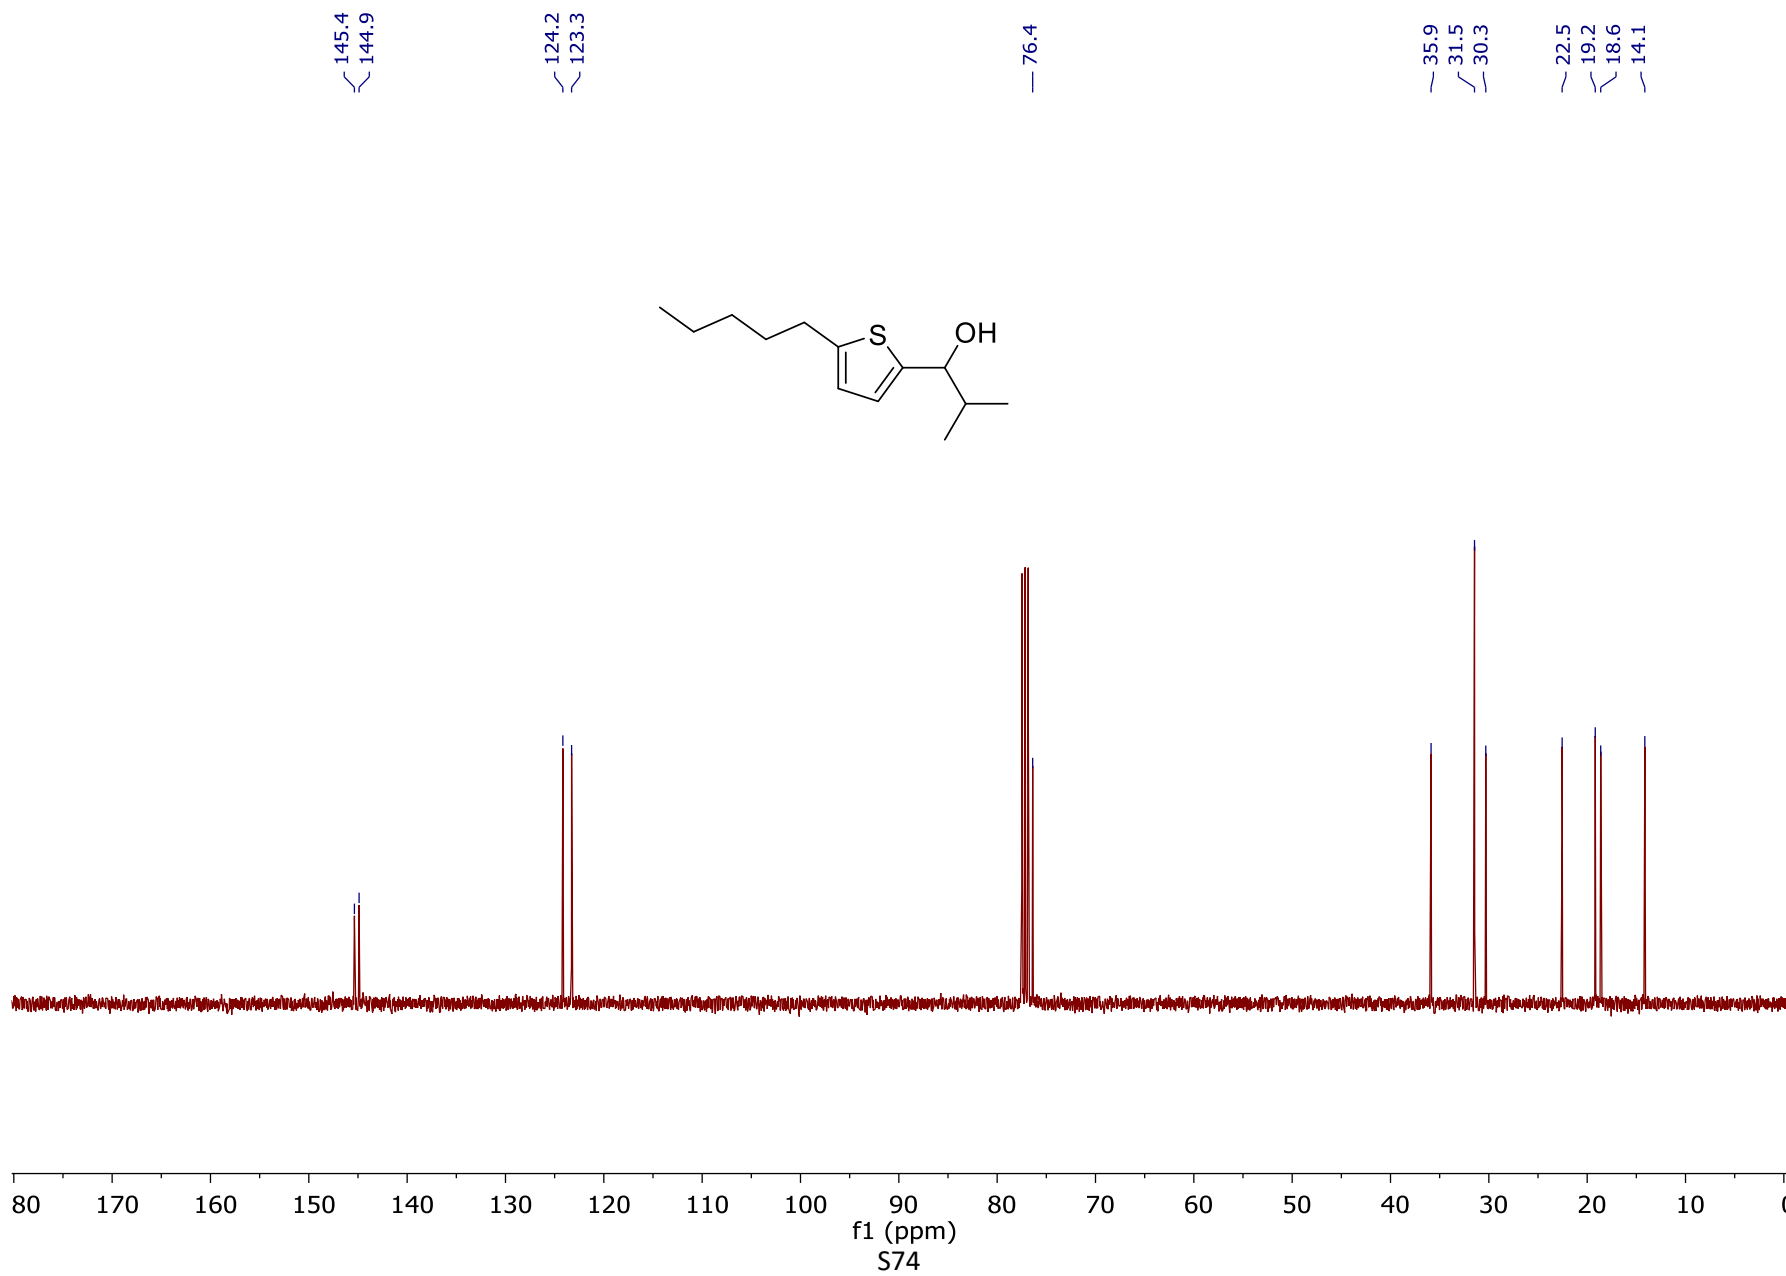

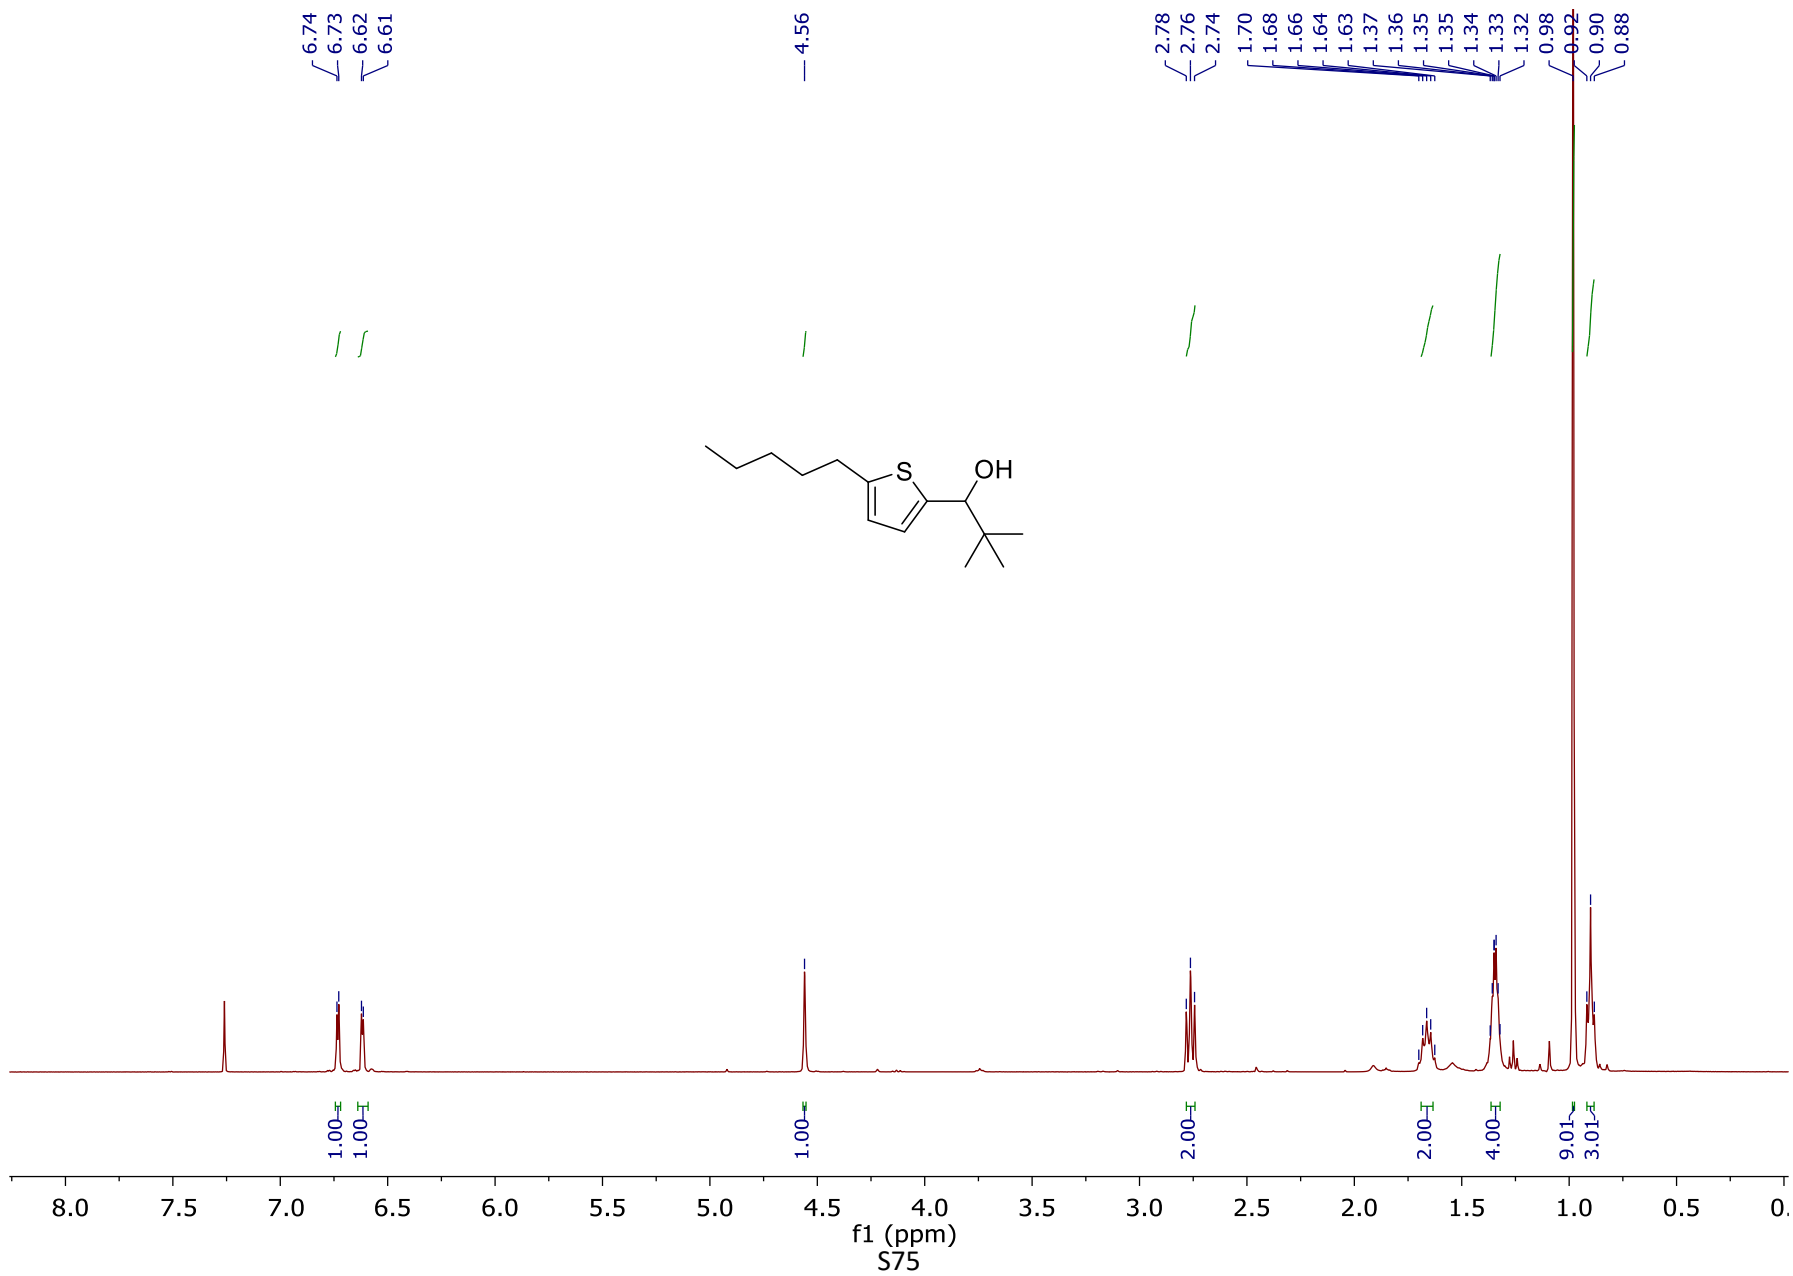

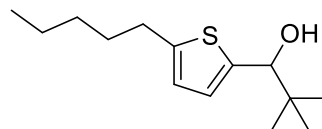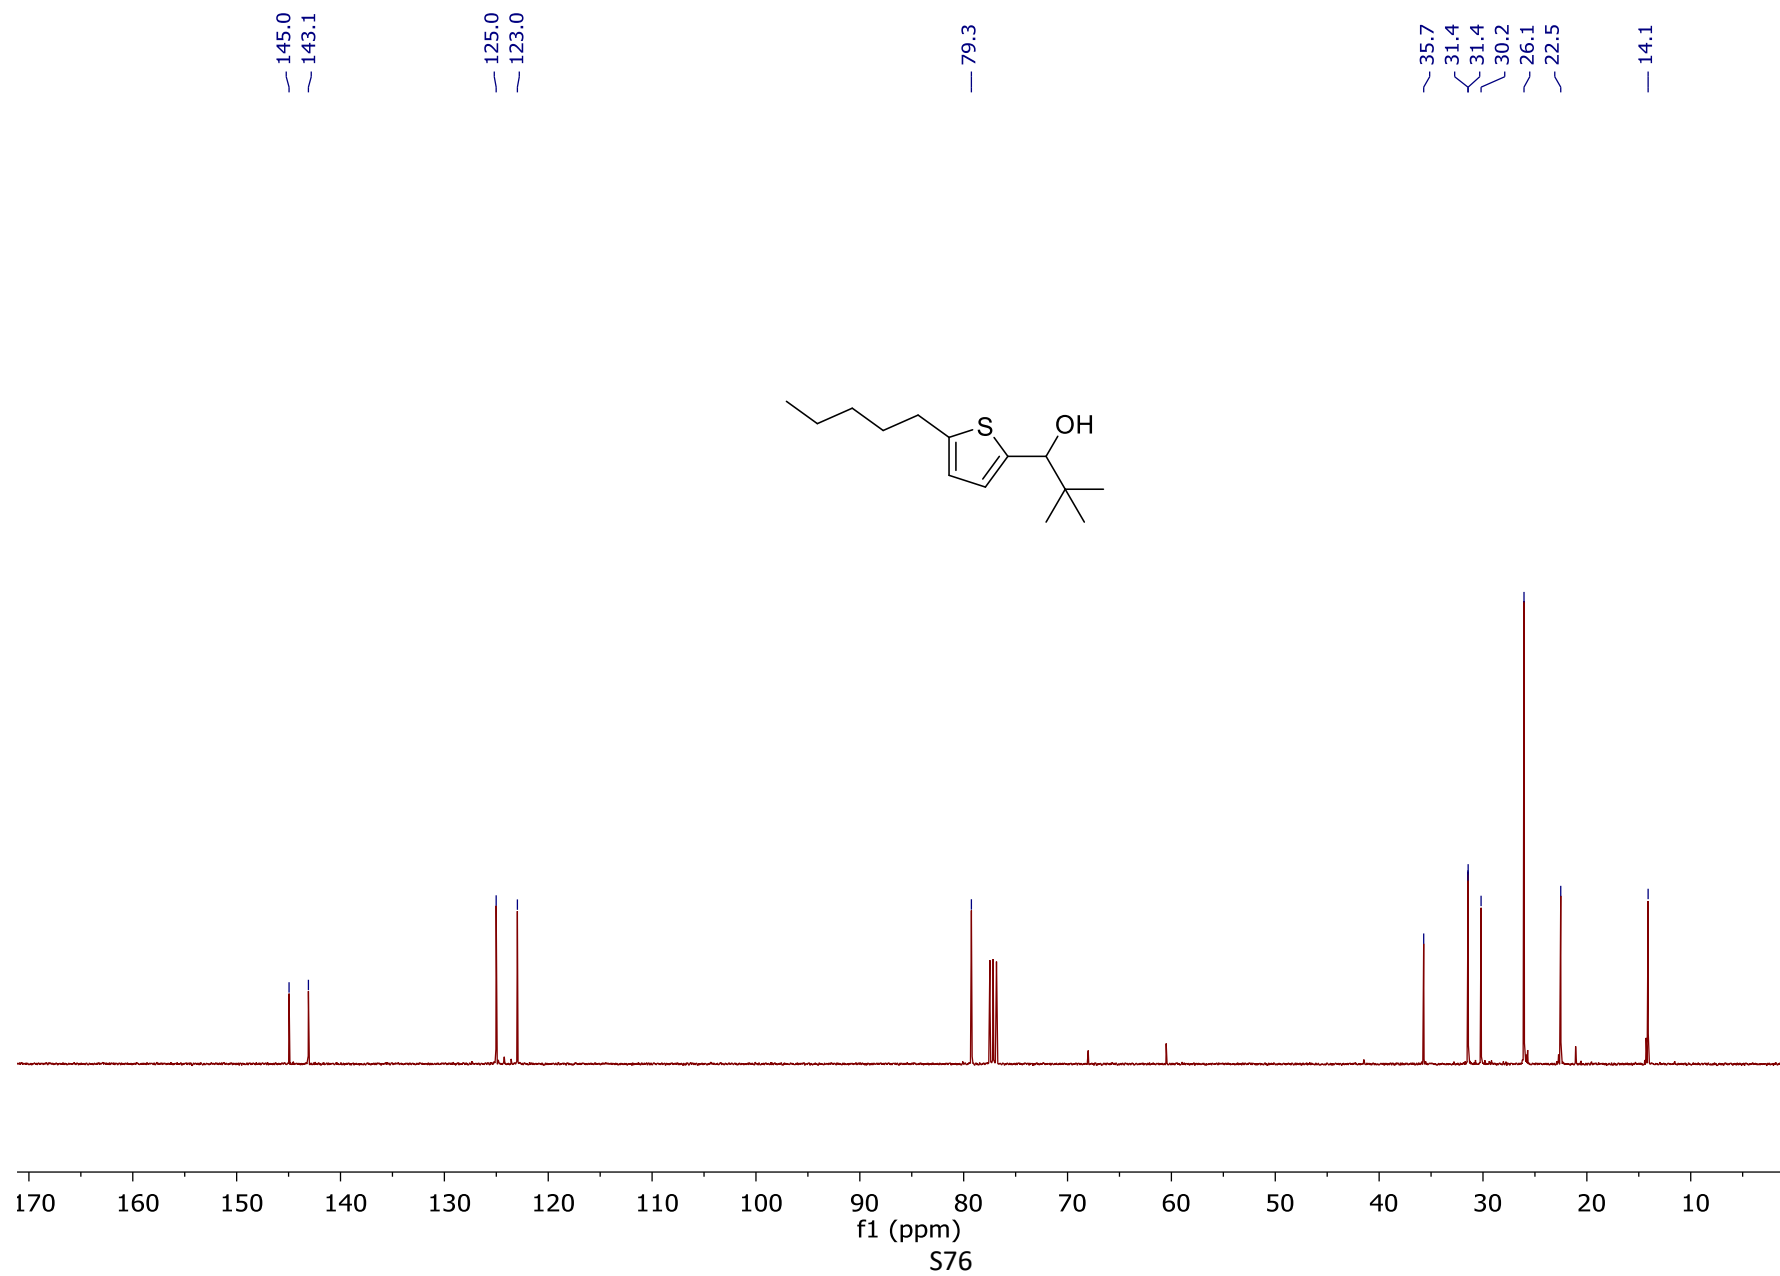

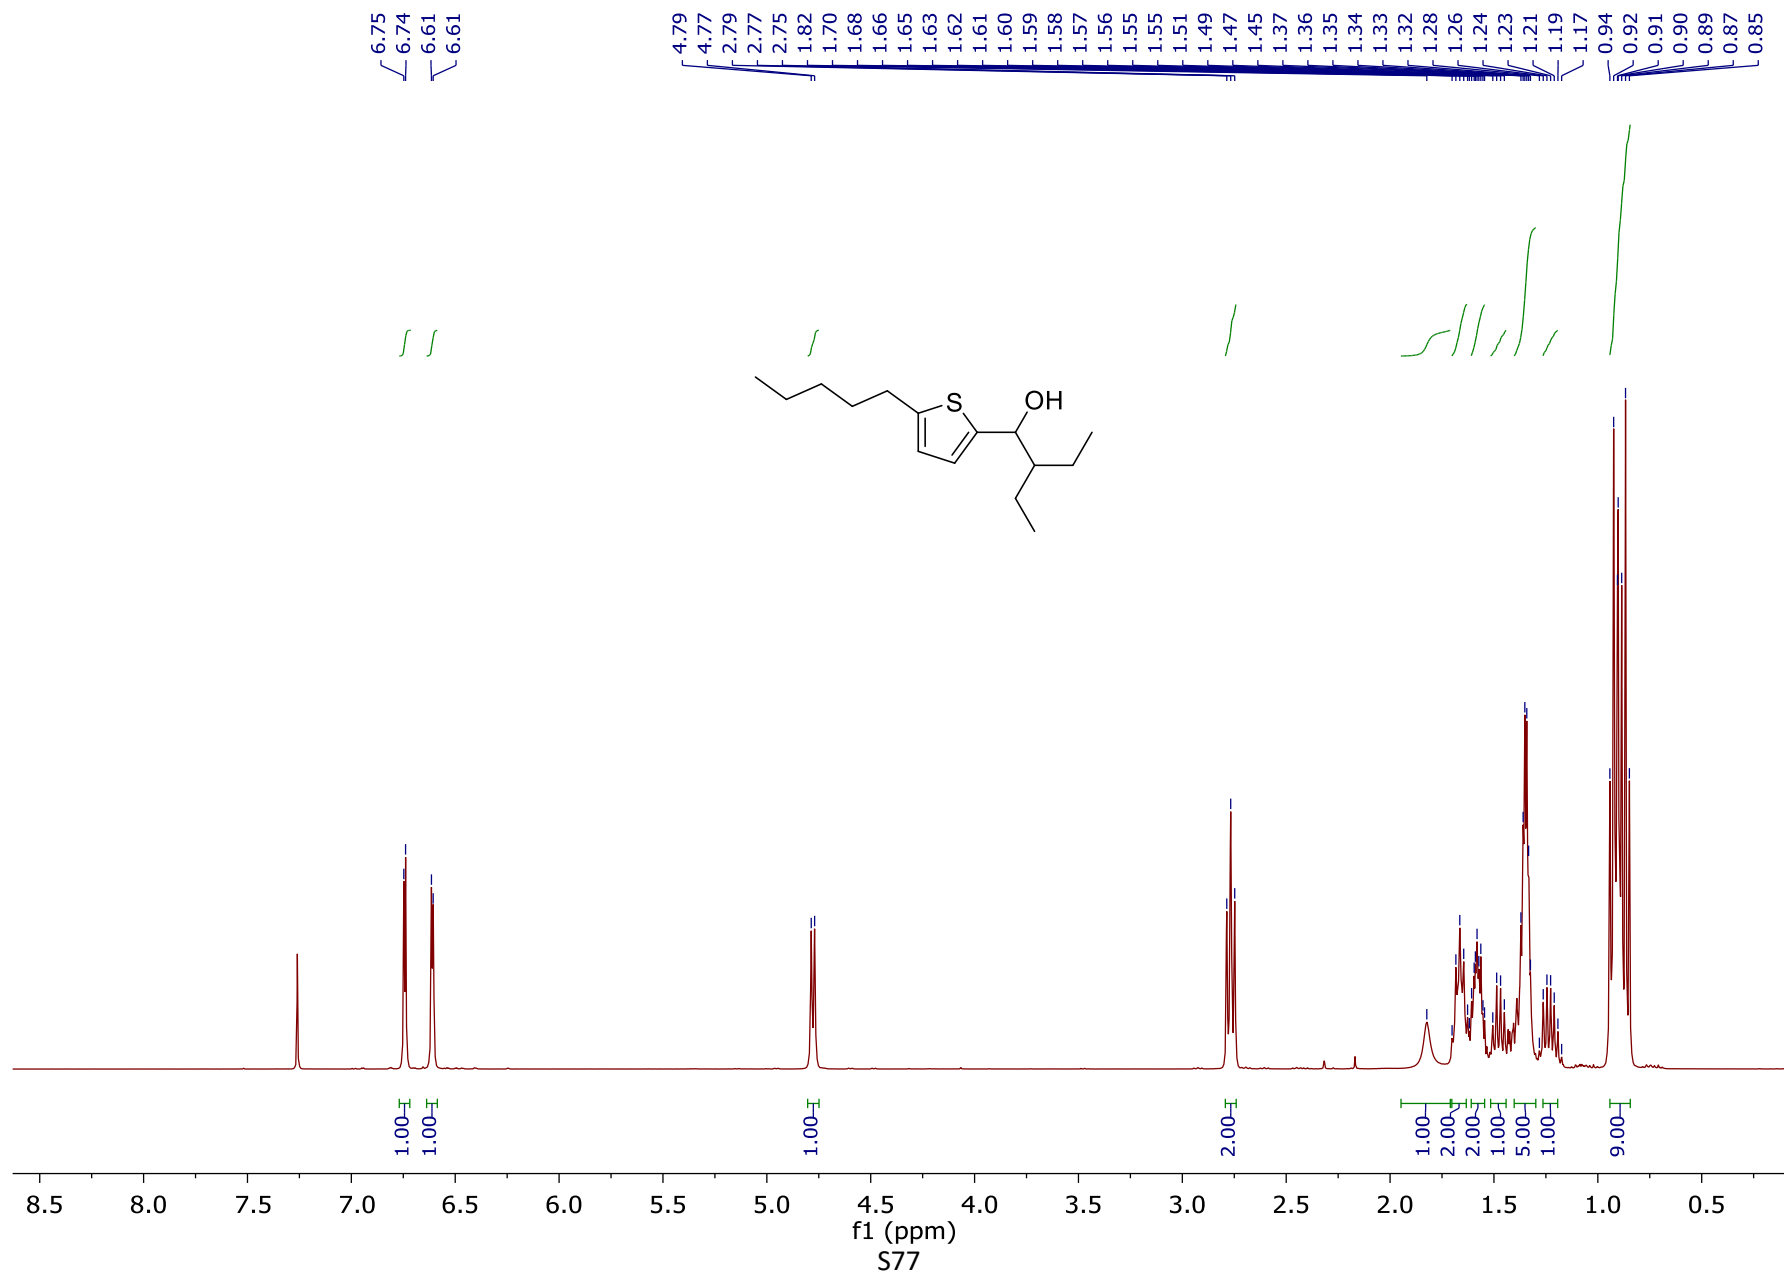

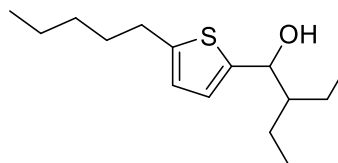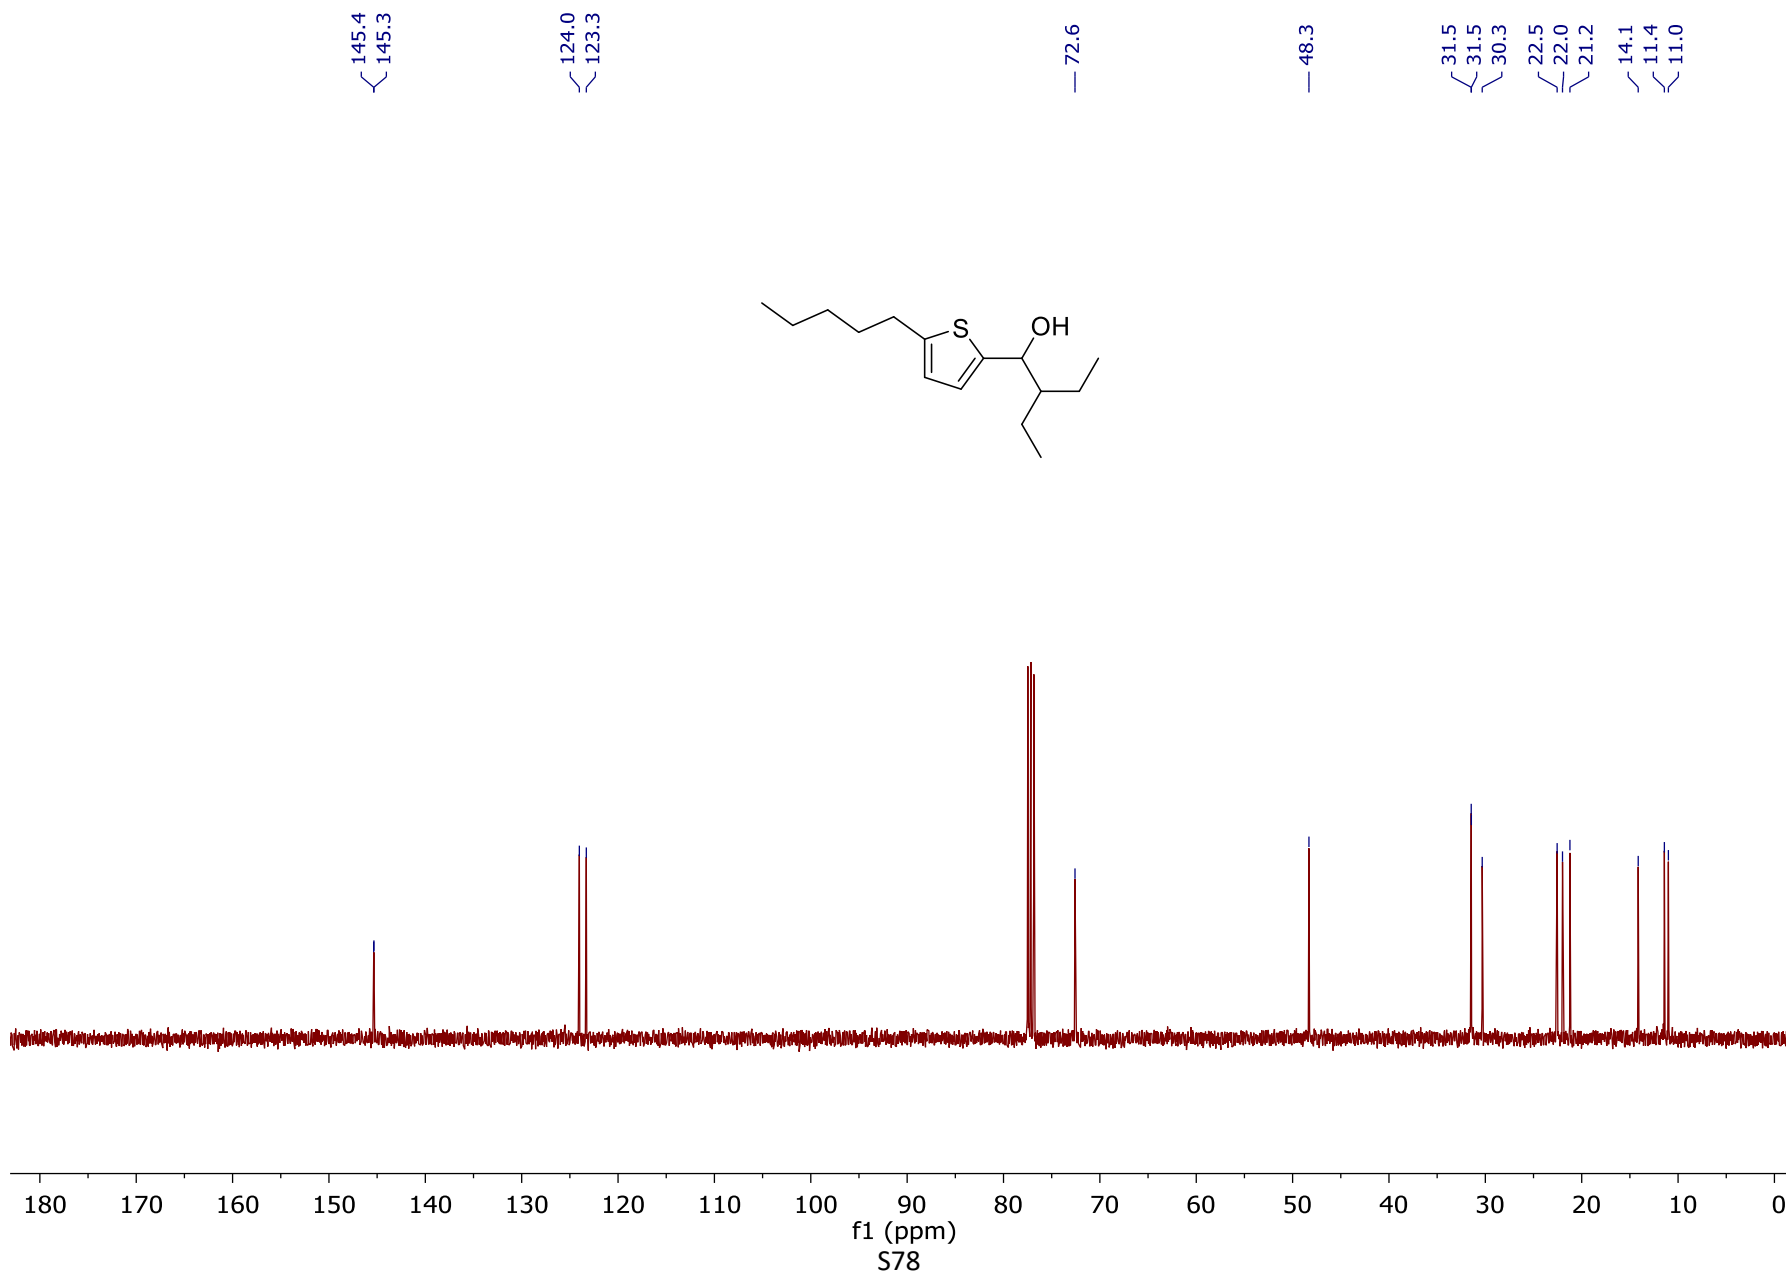

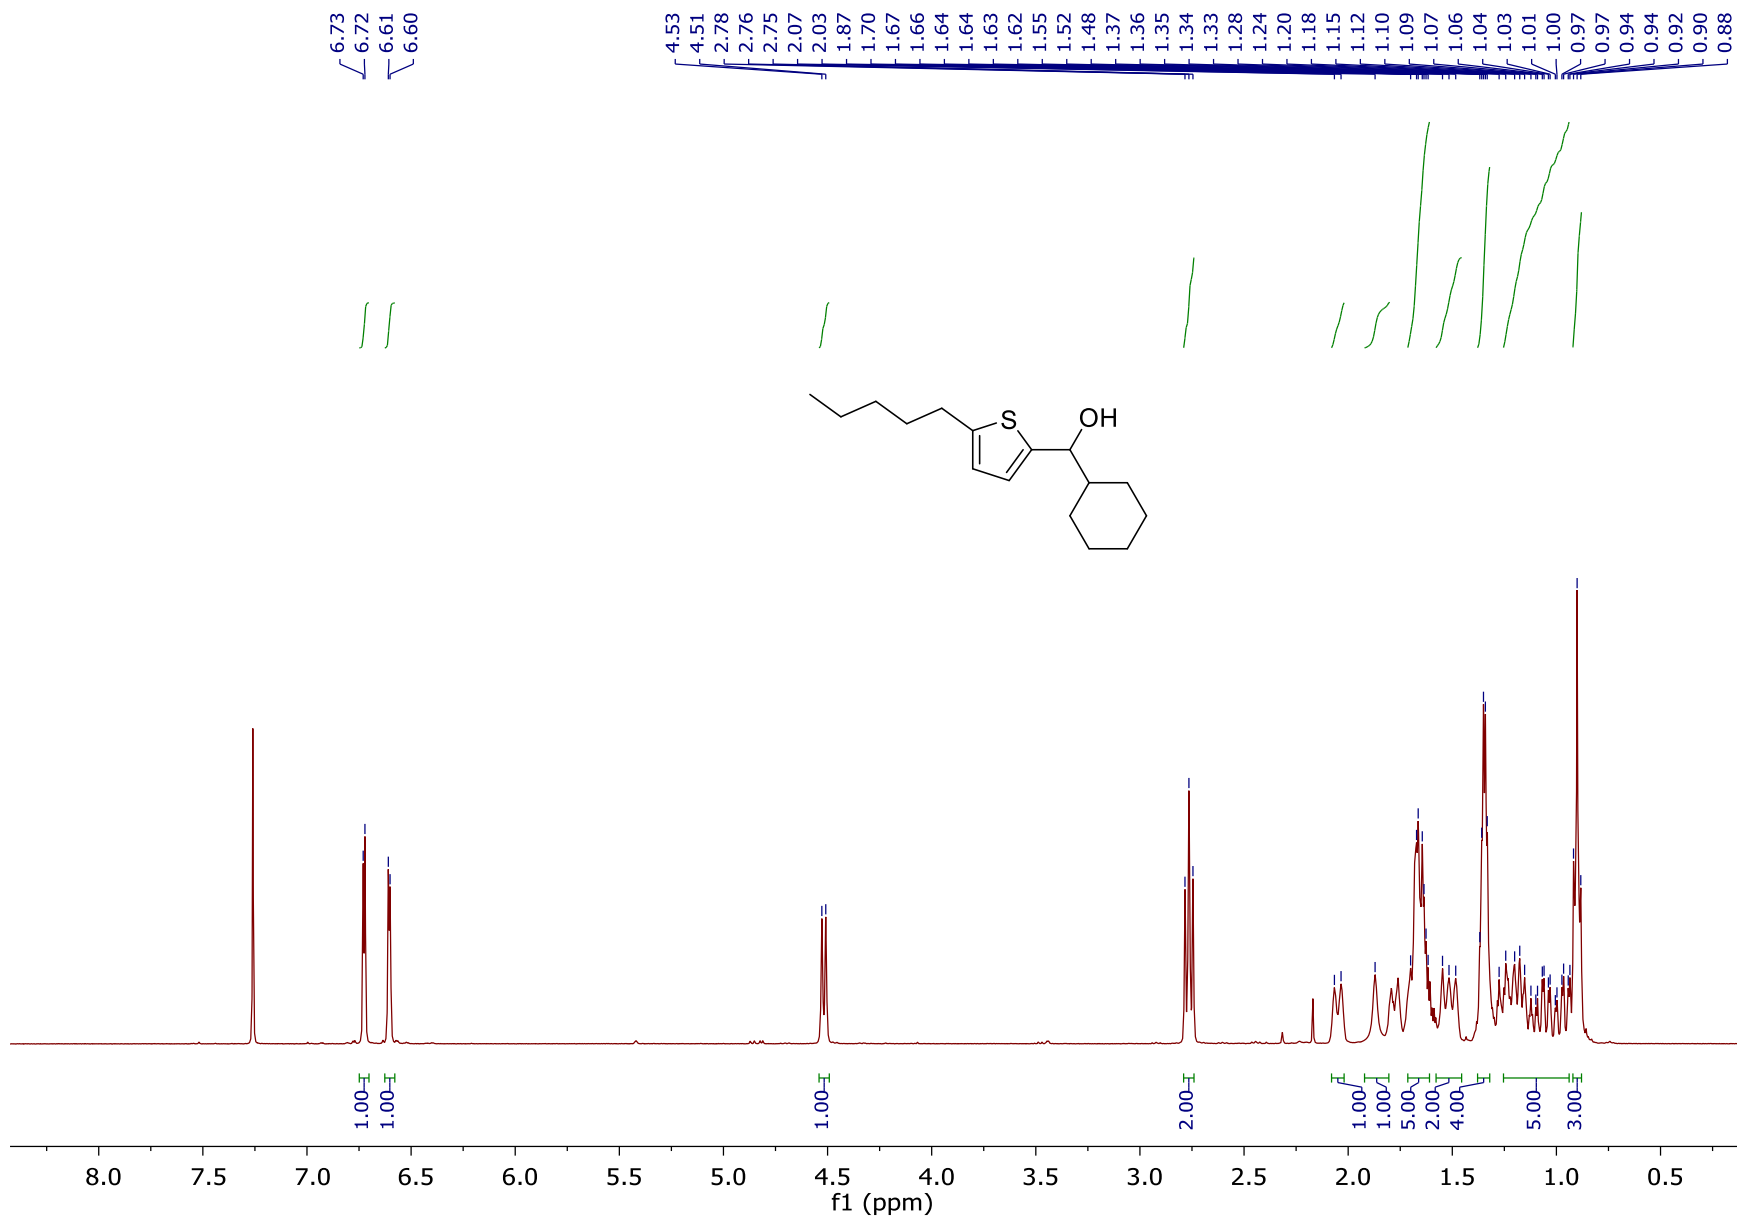

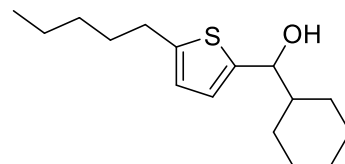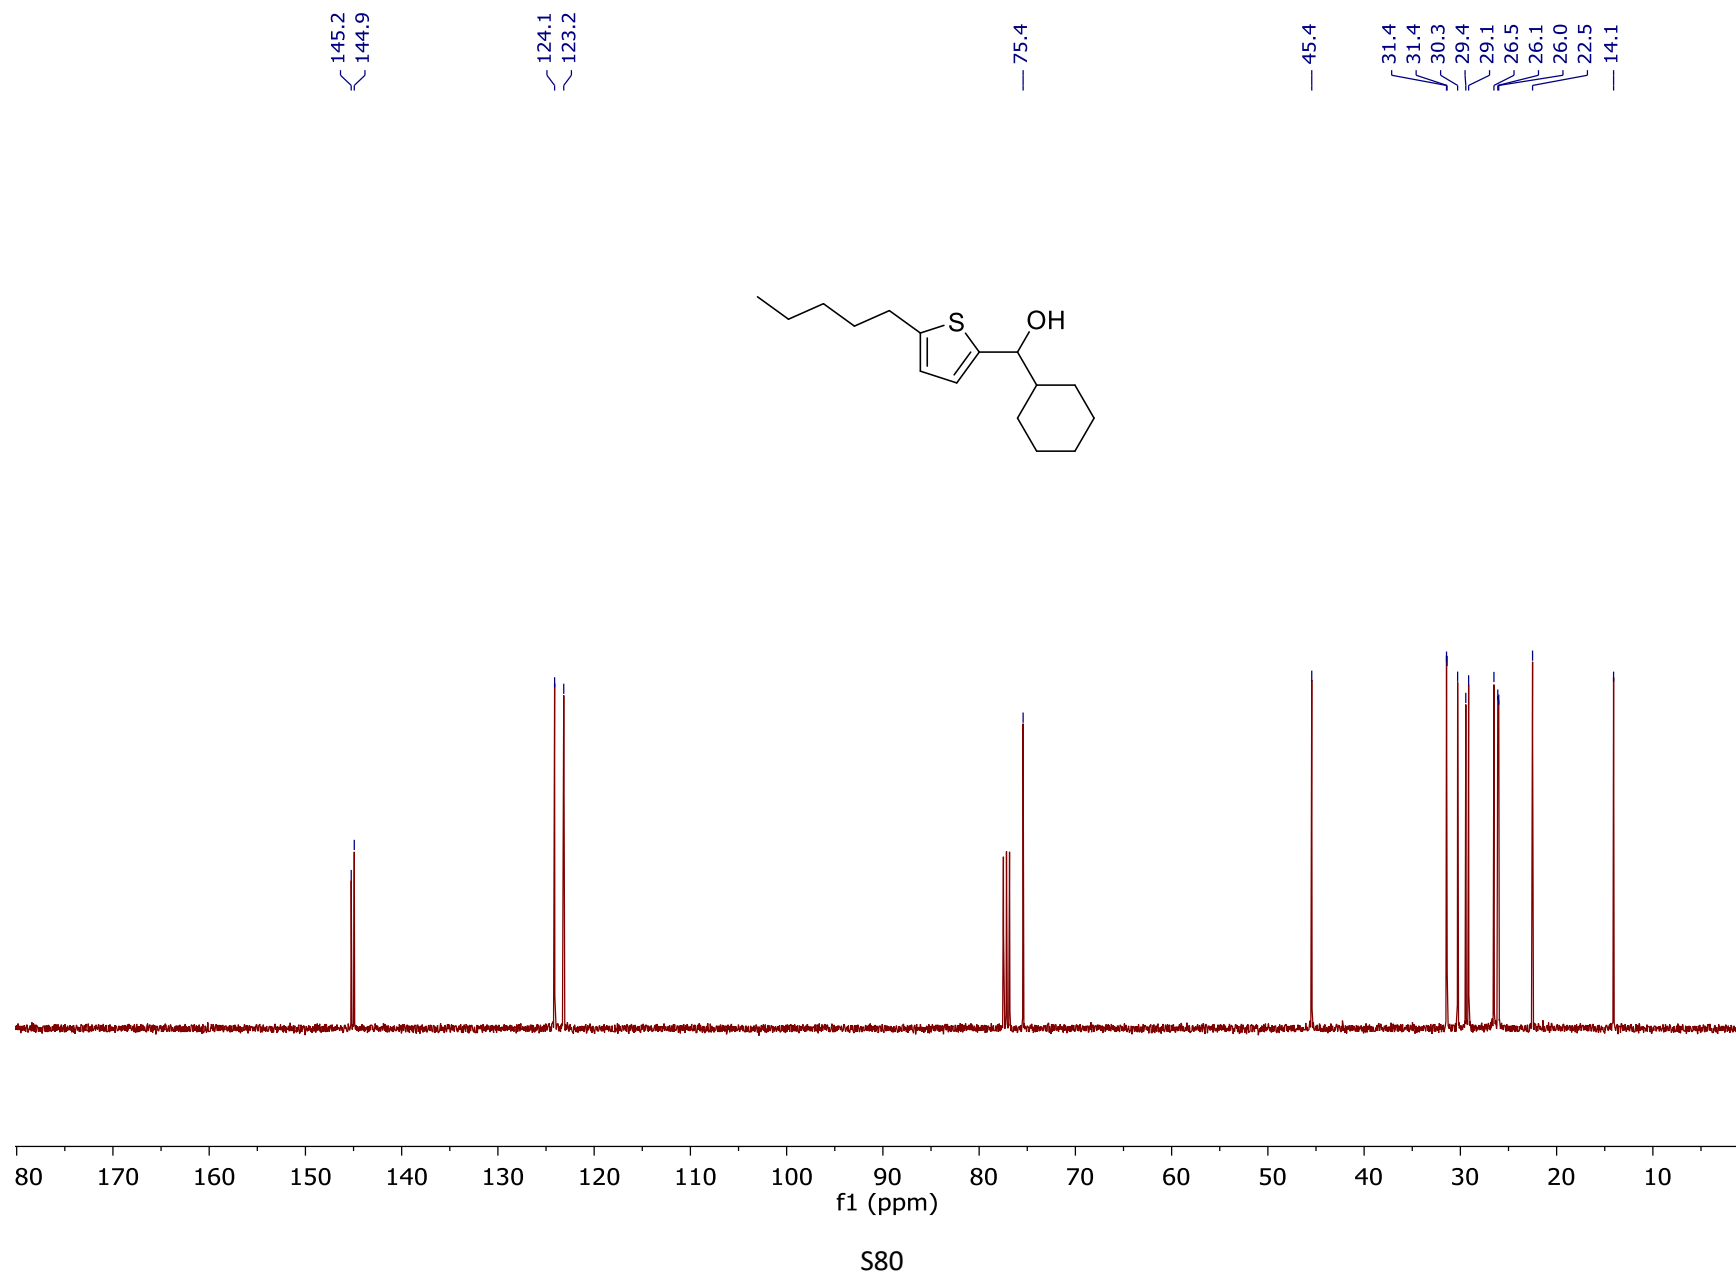



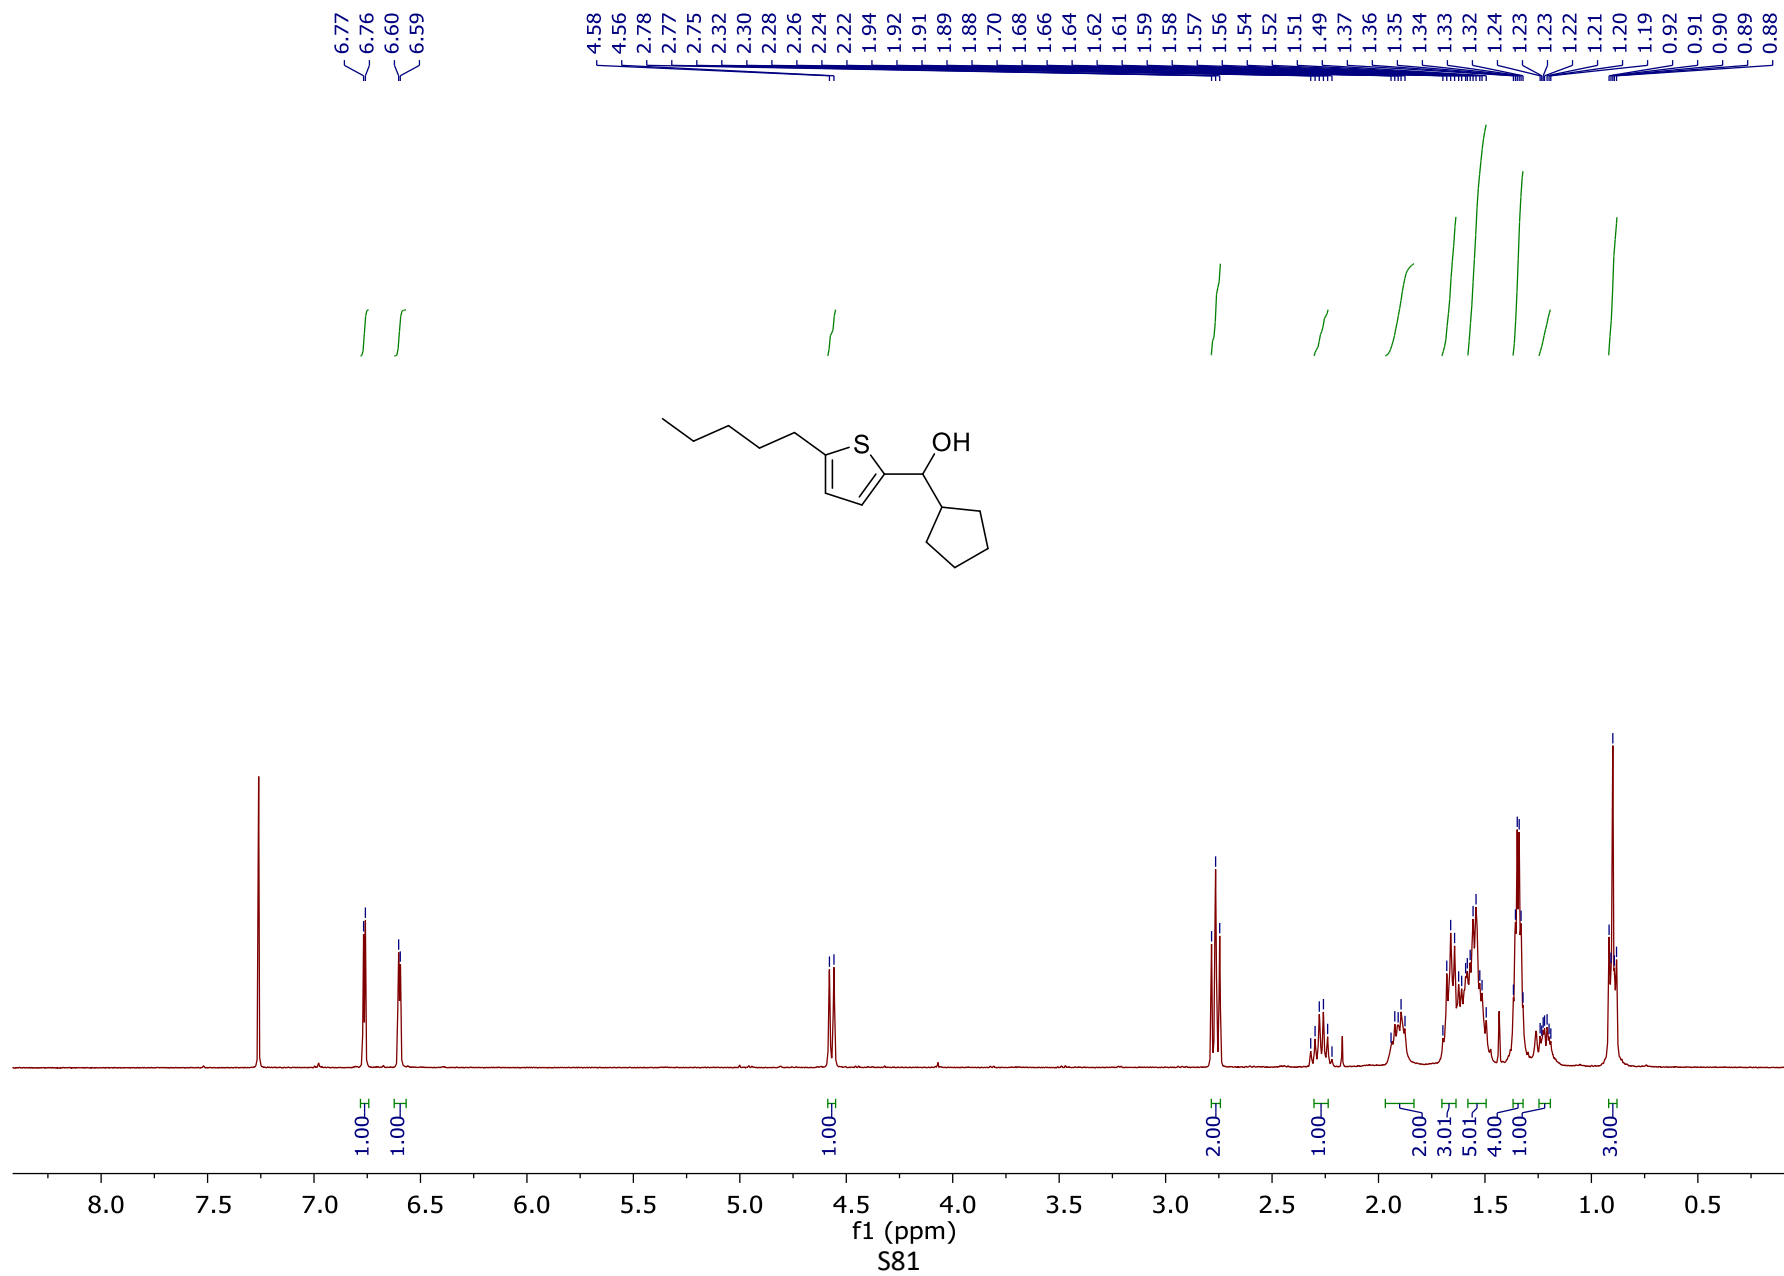

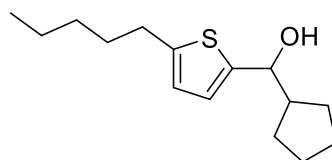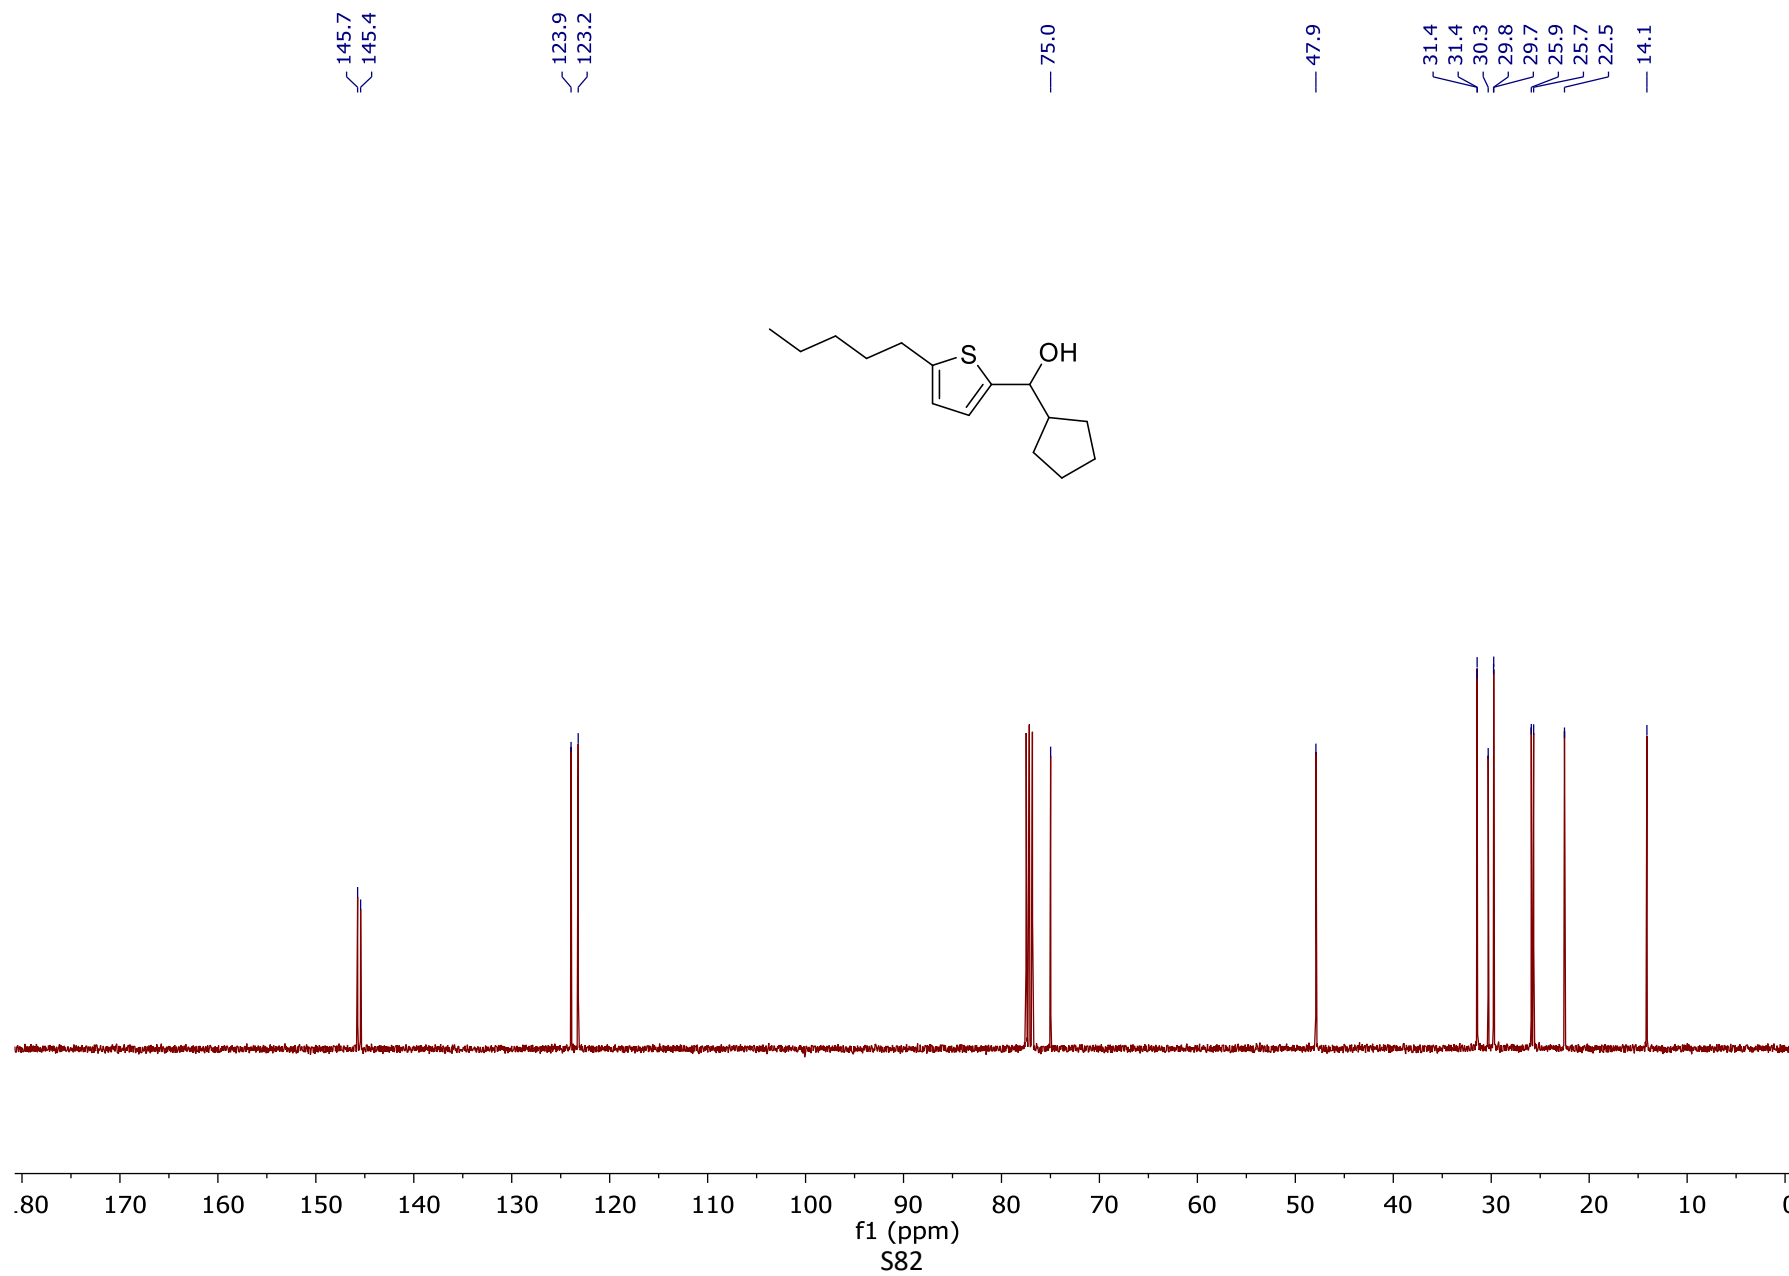

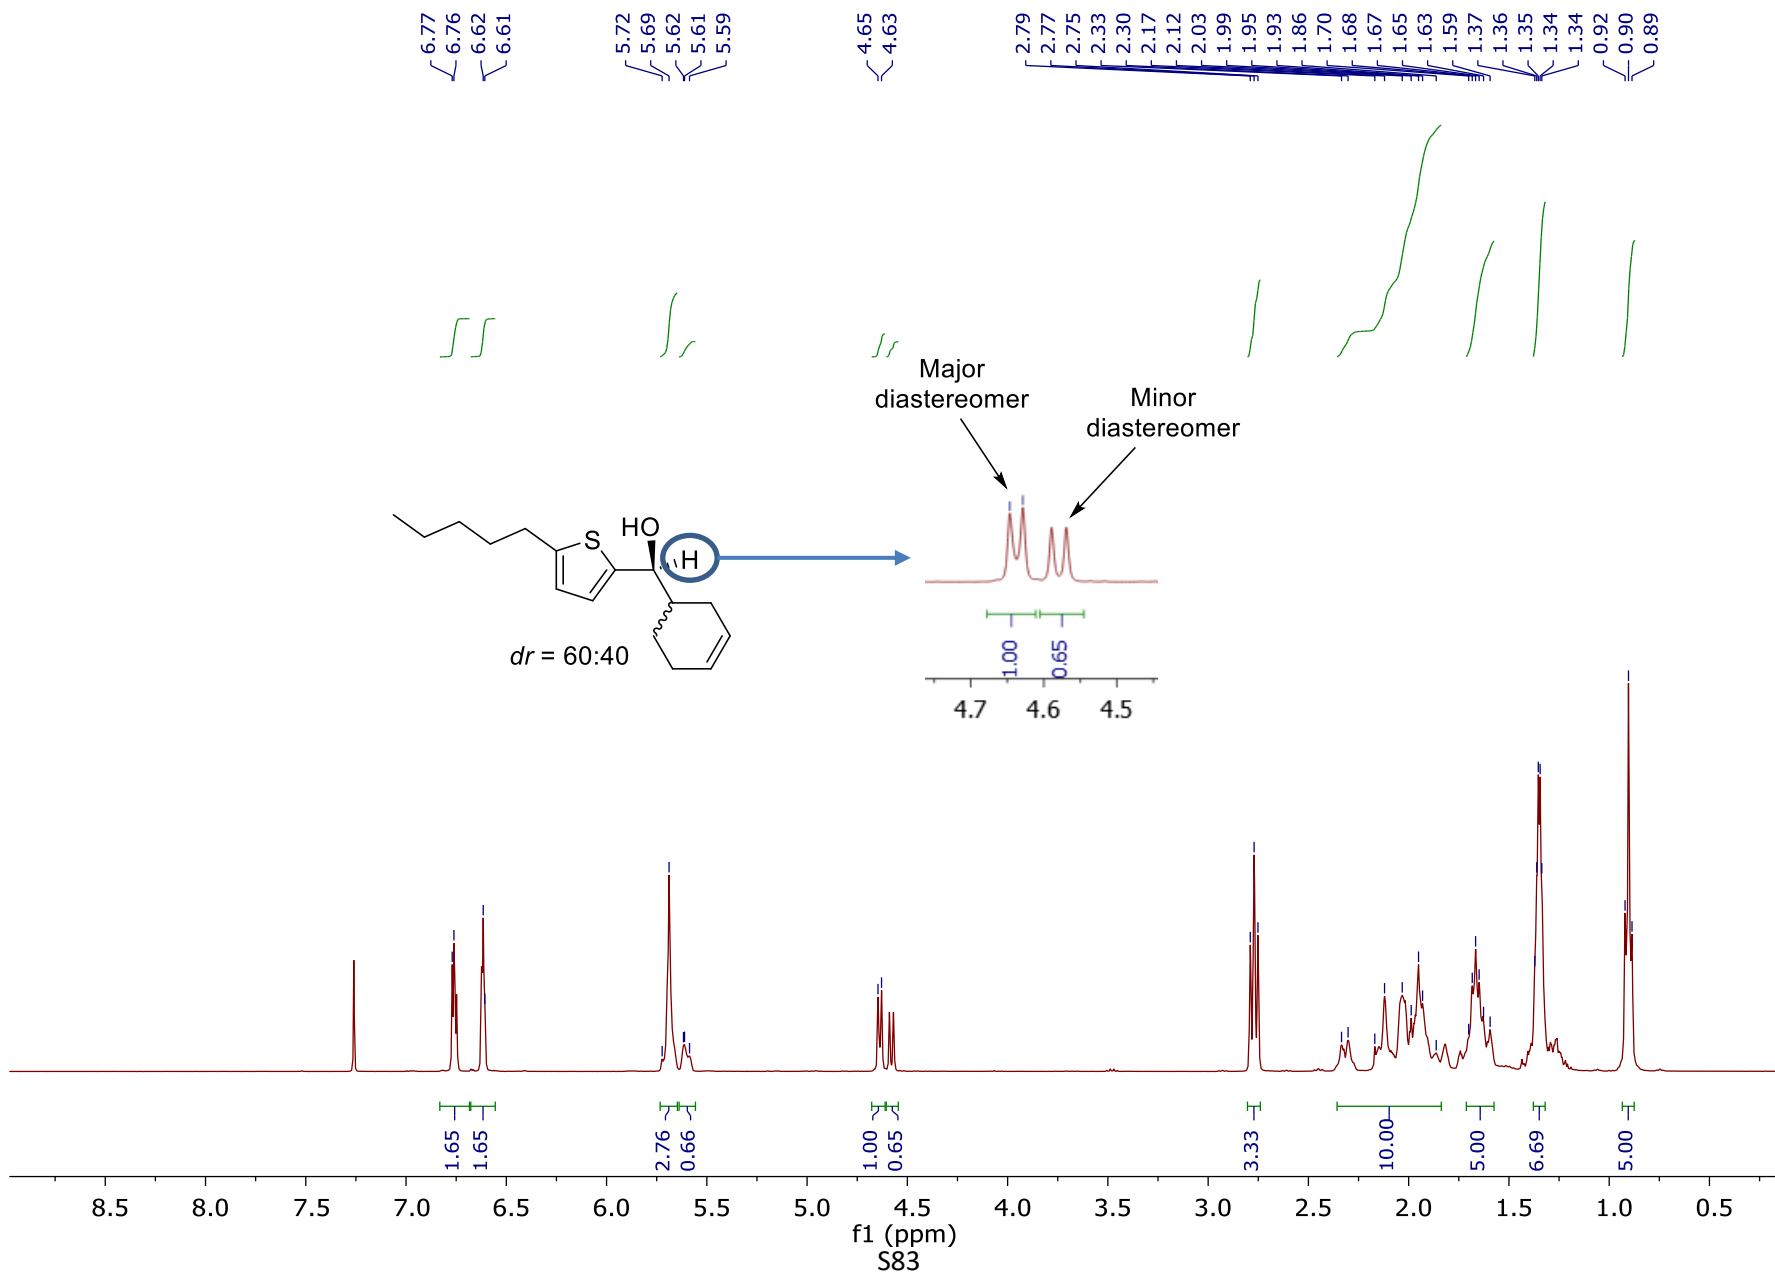

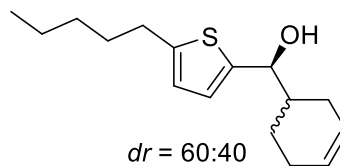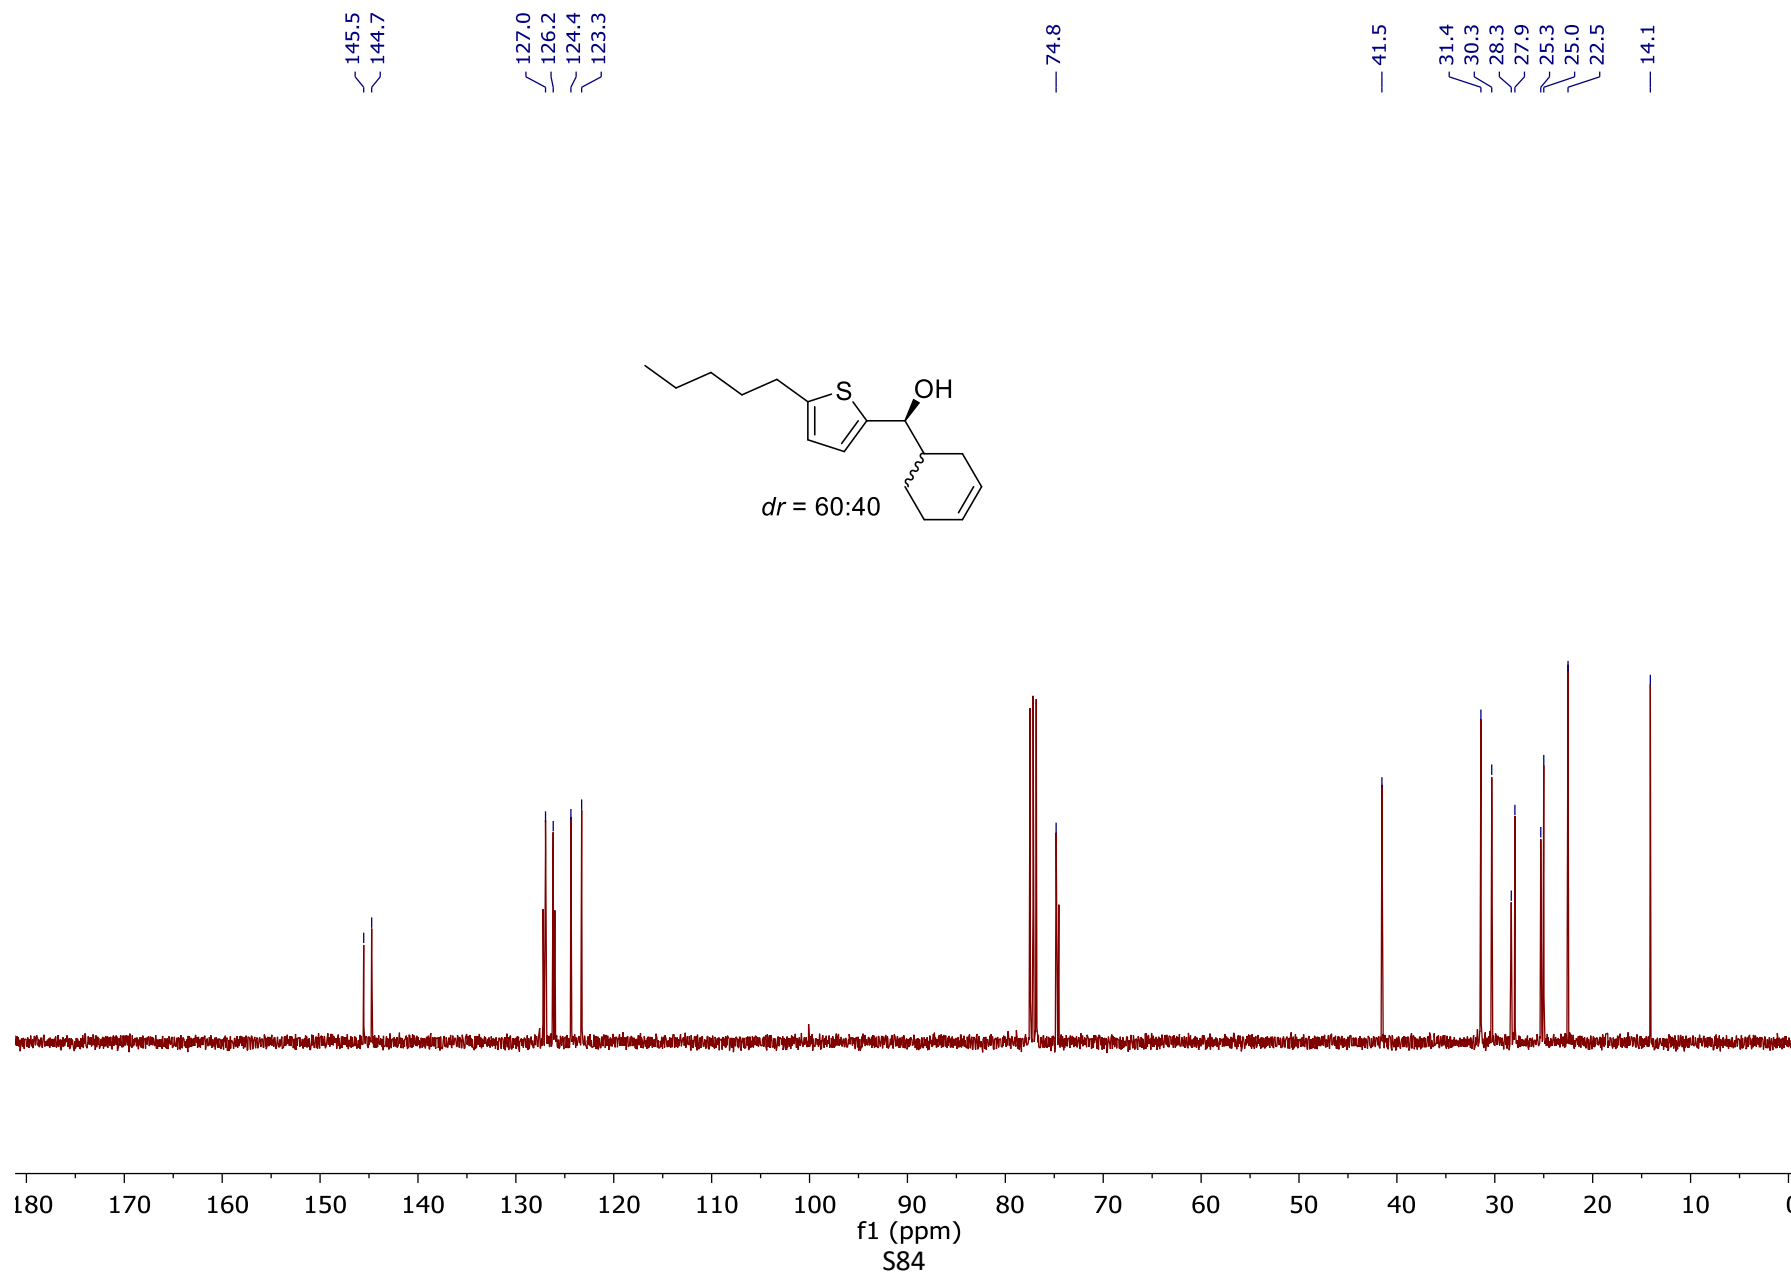

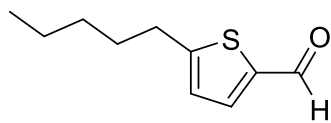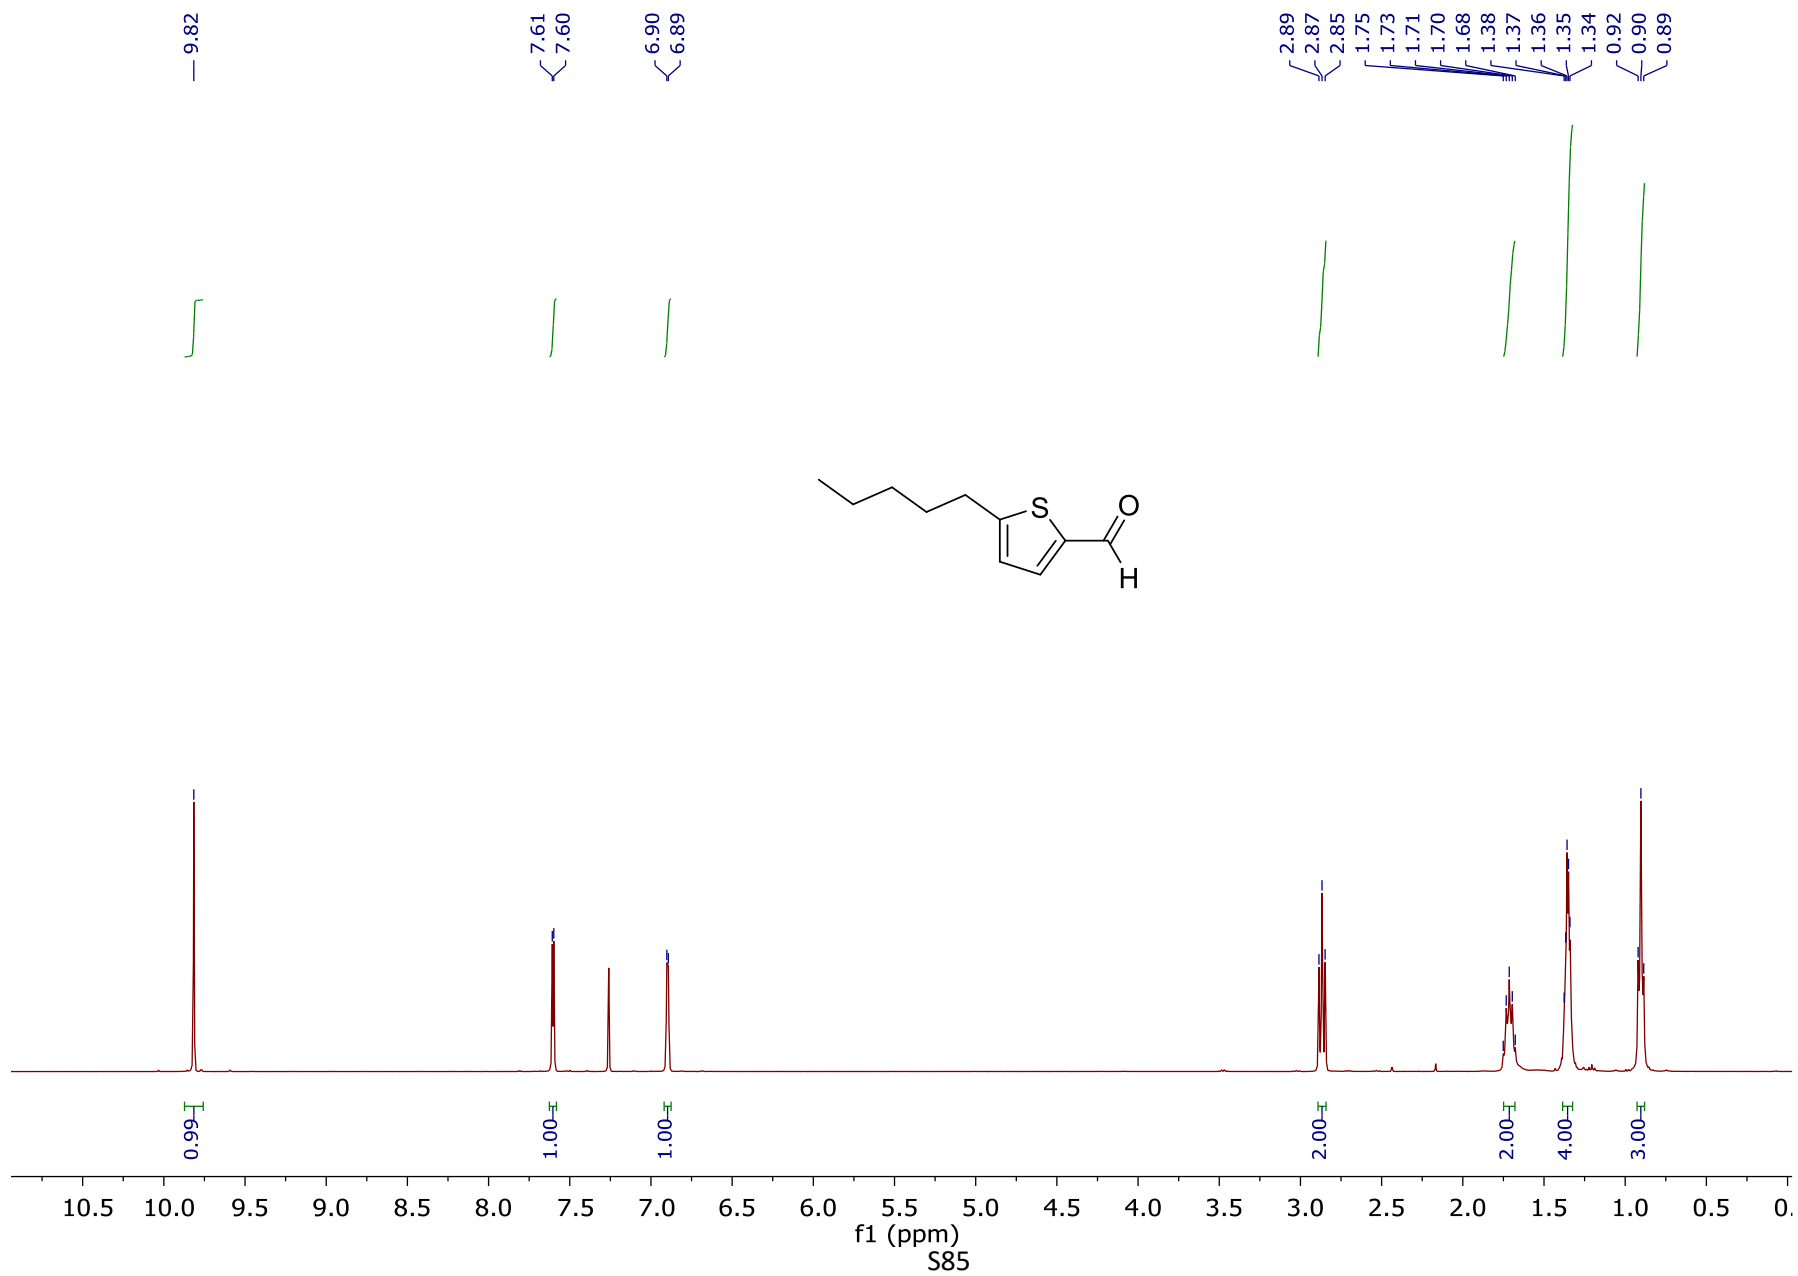

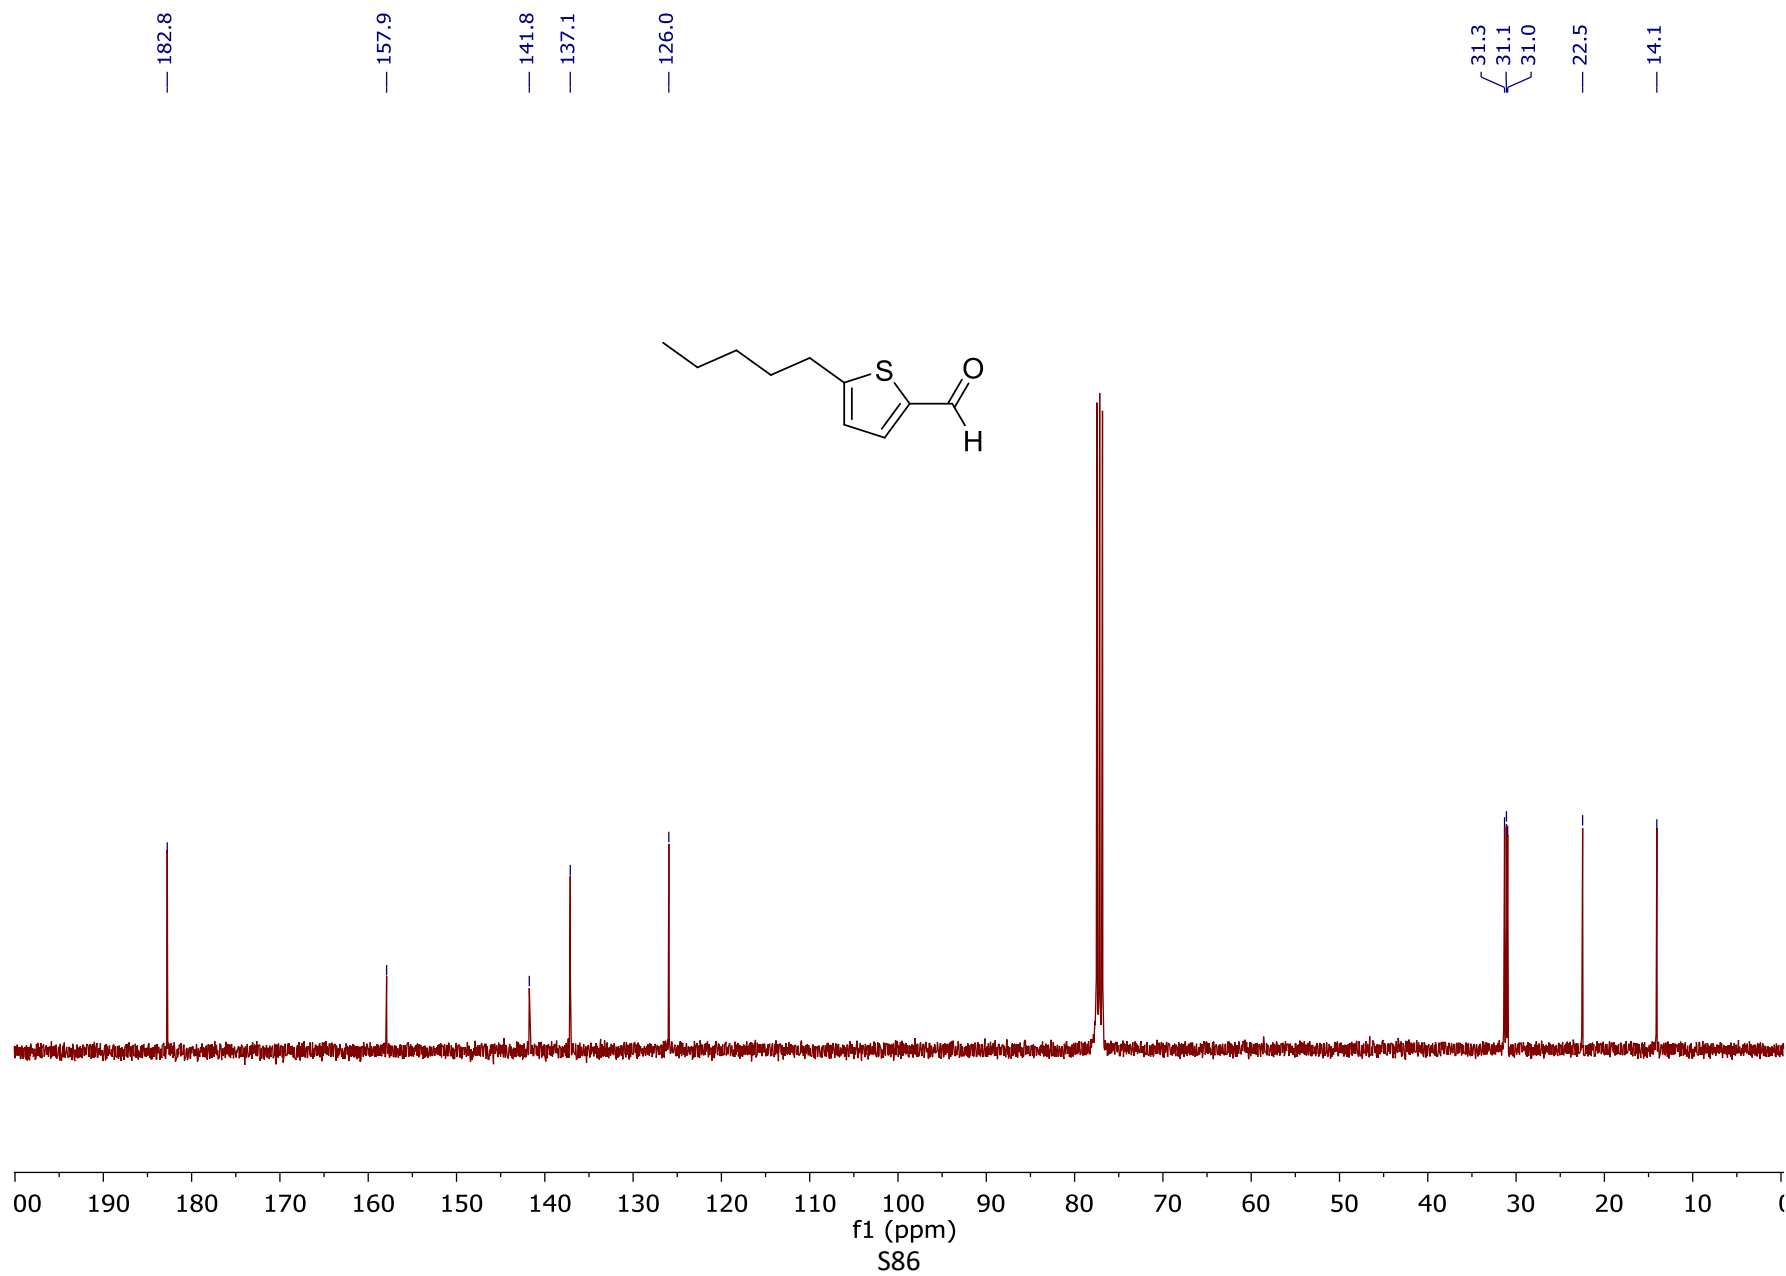

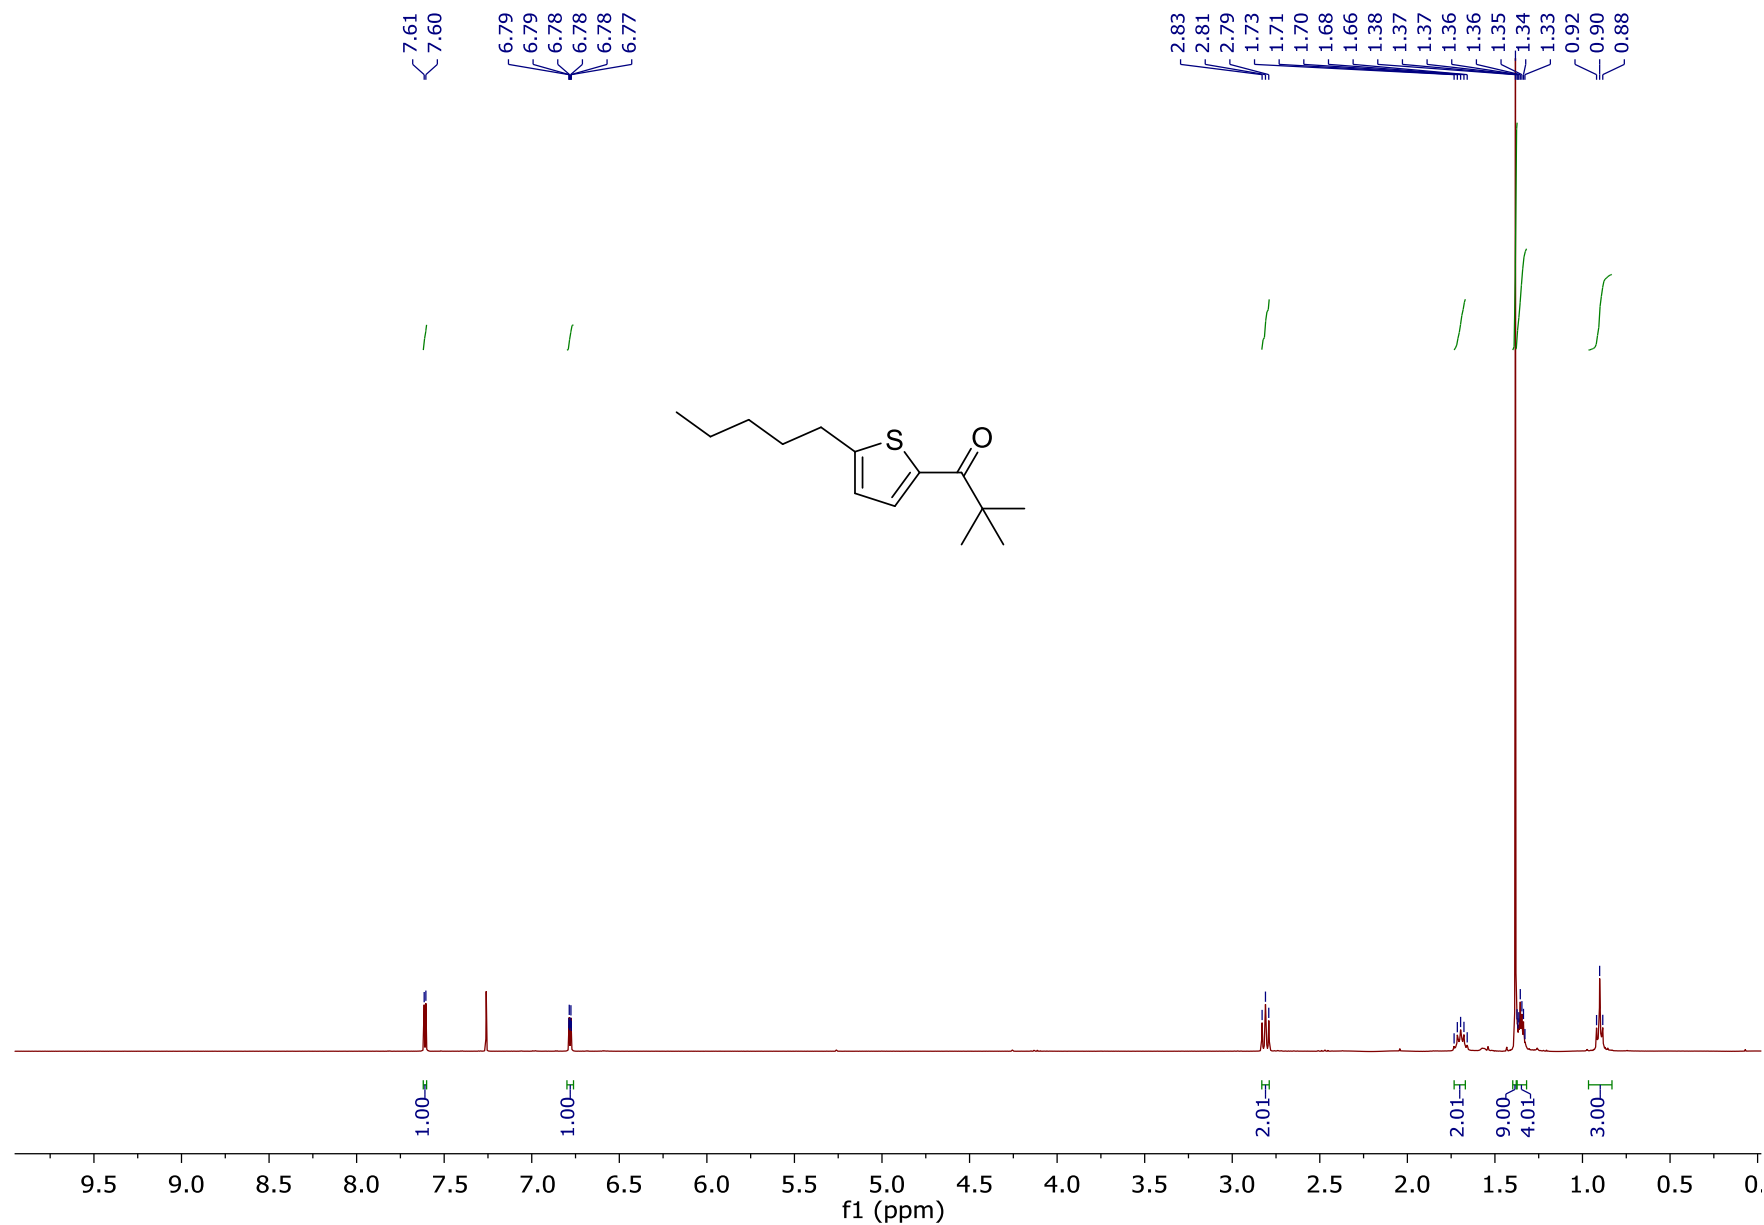

S87

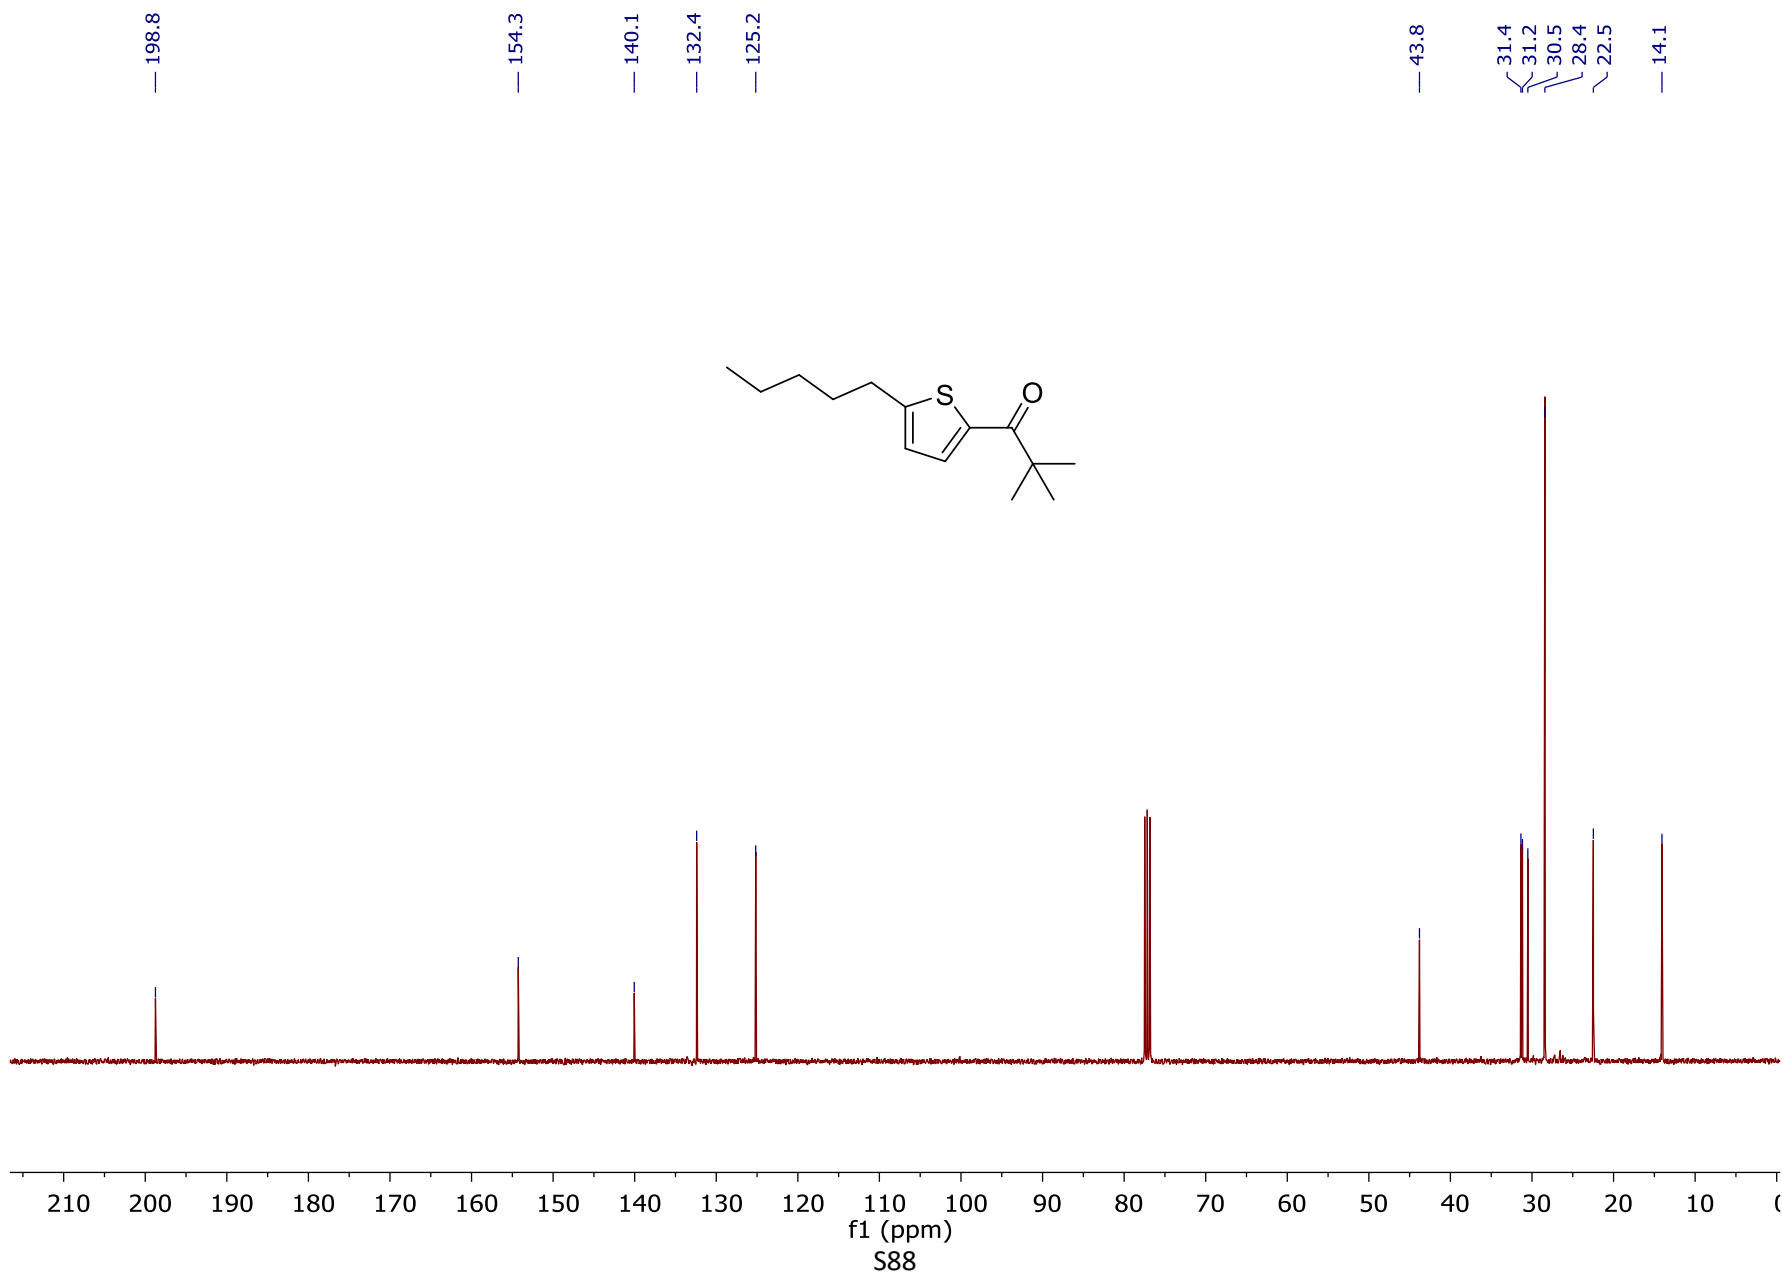



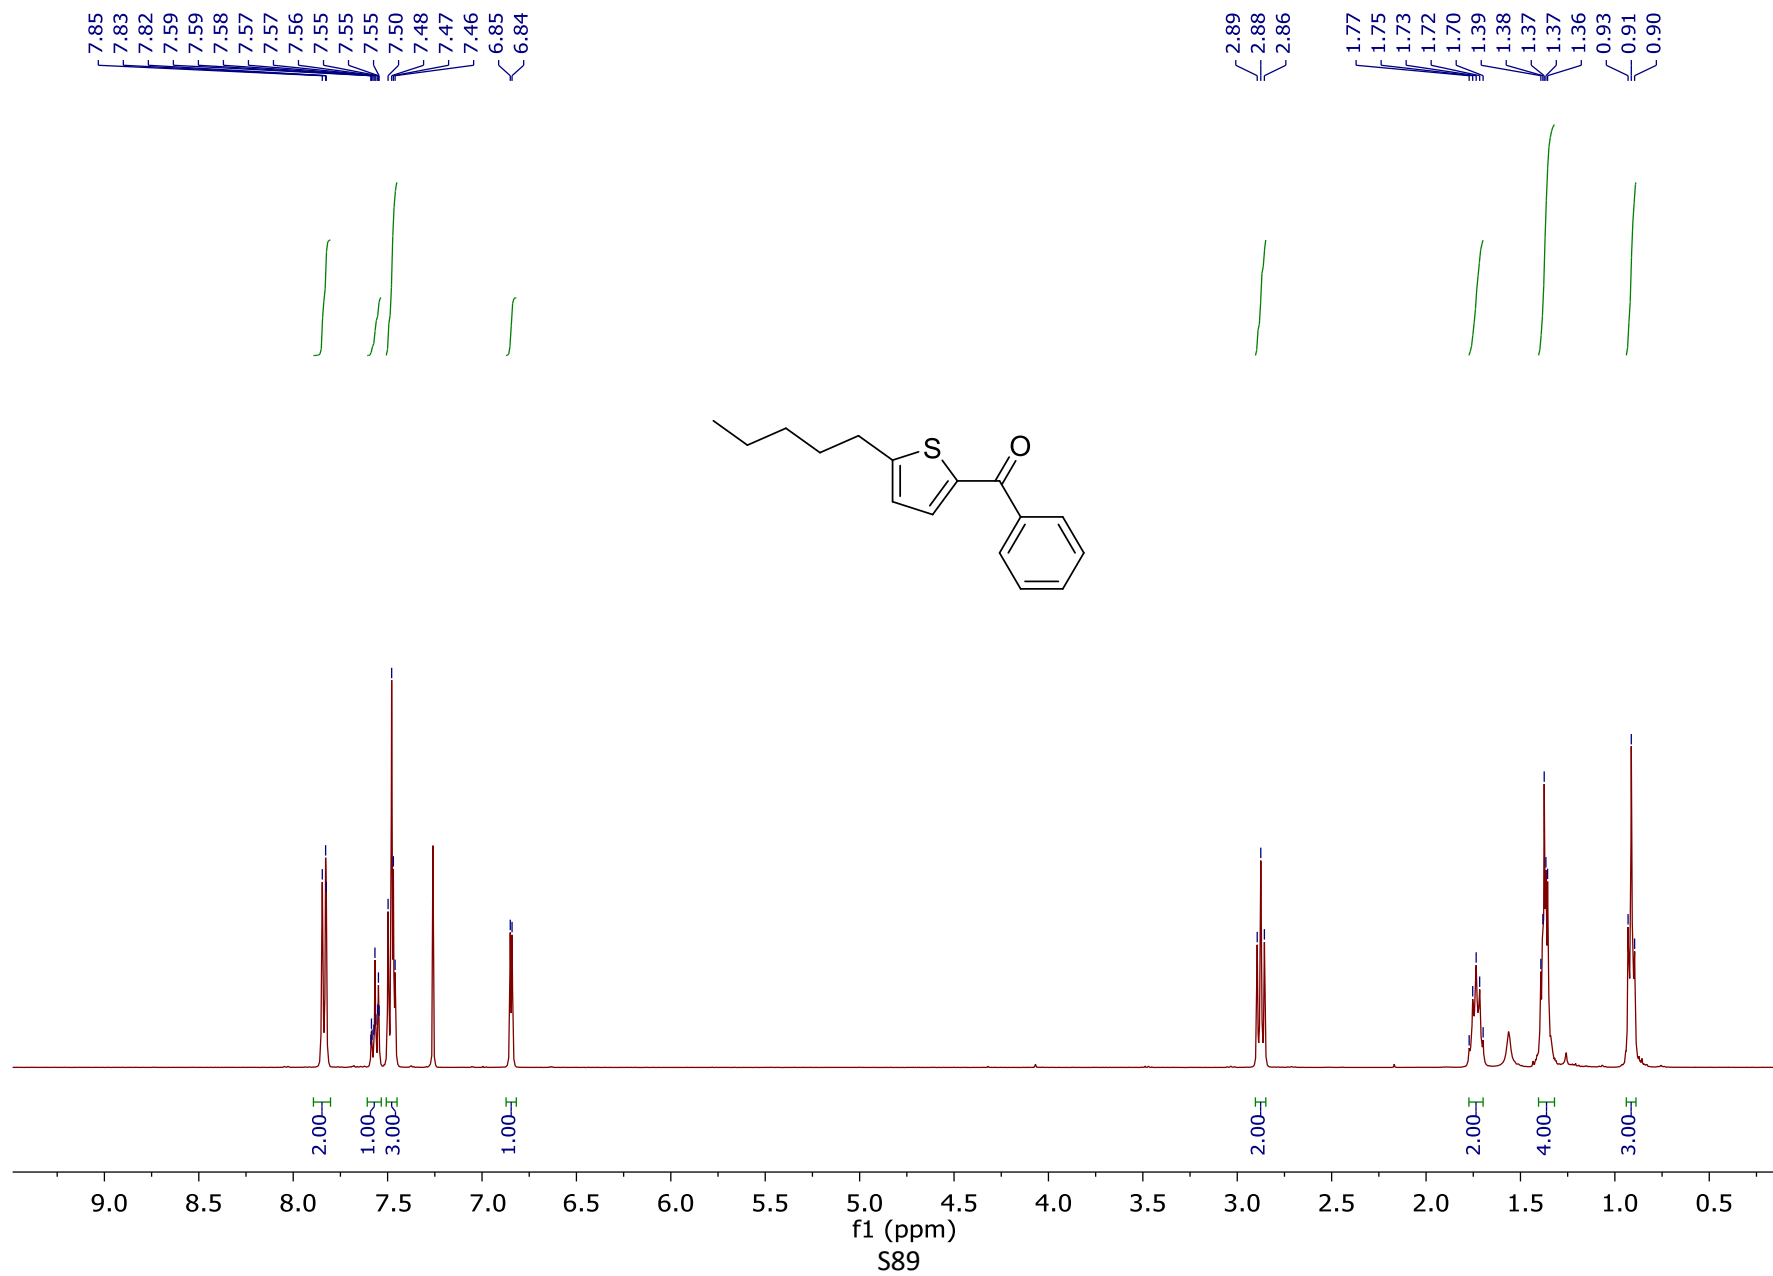

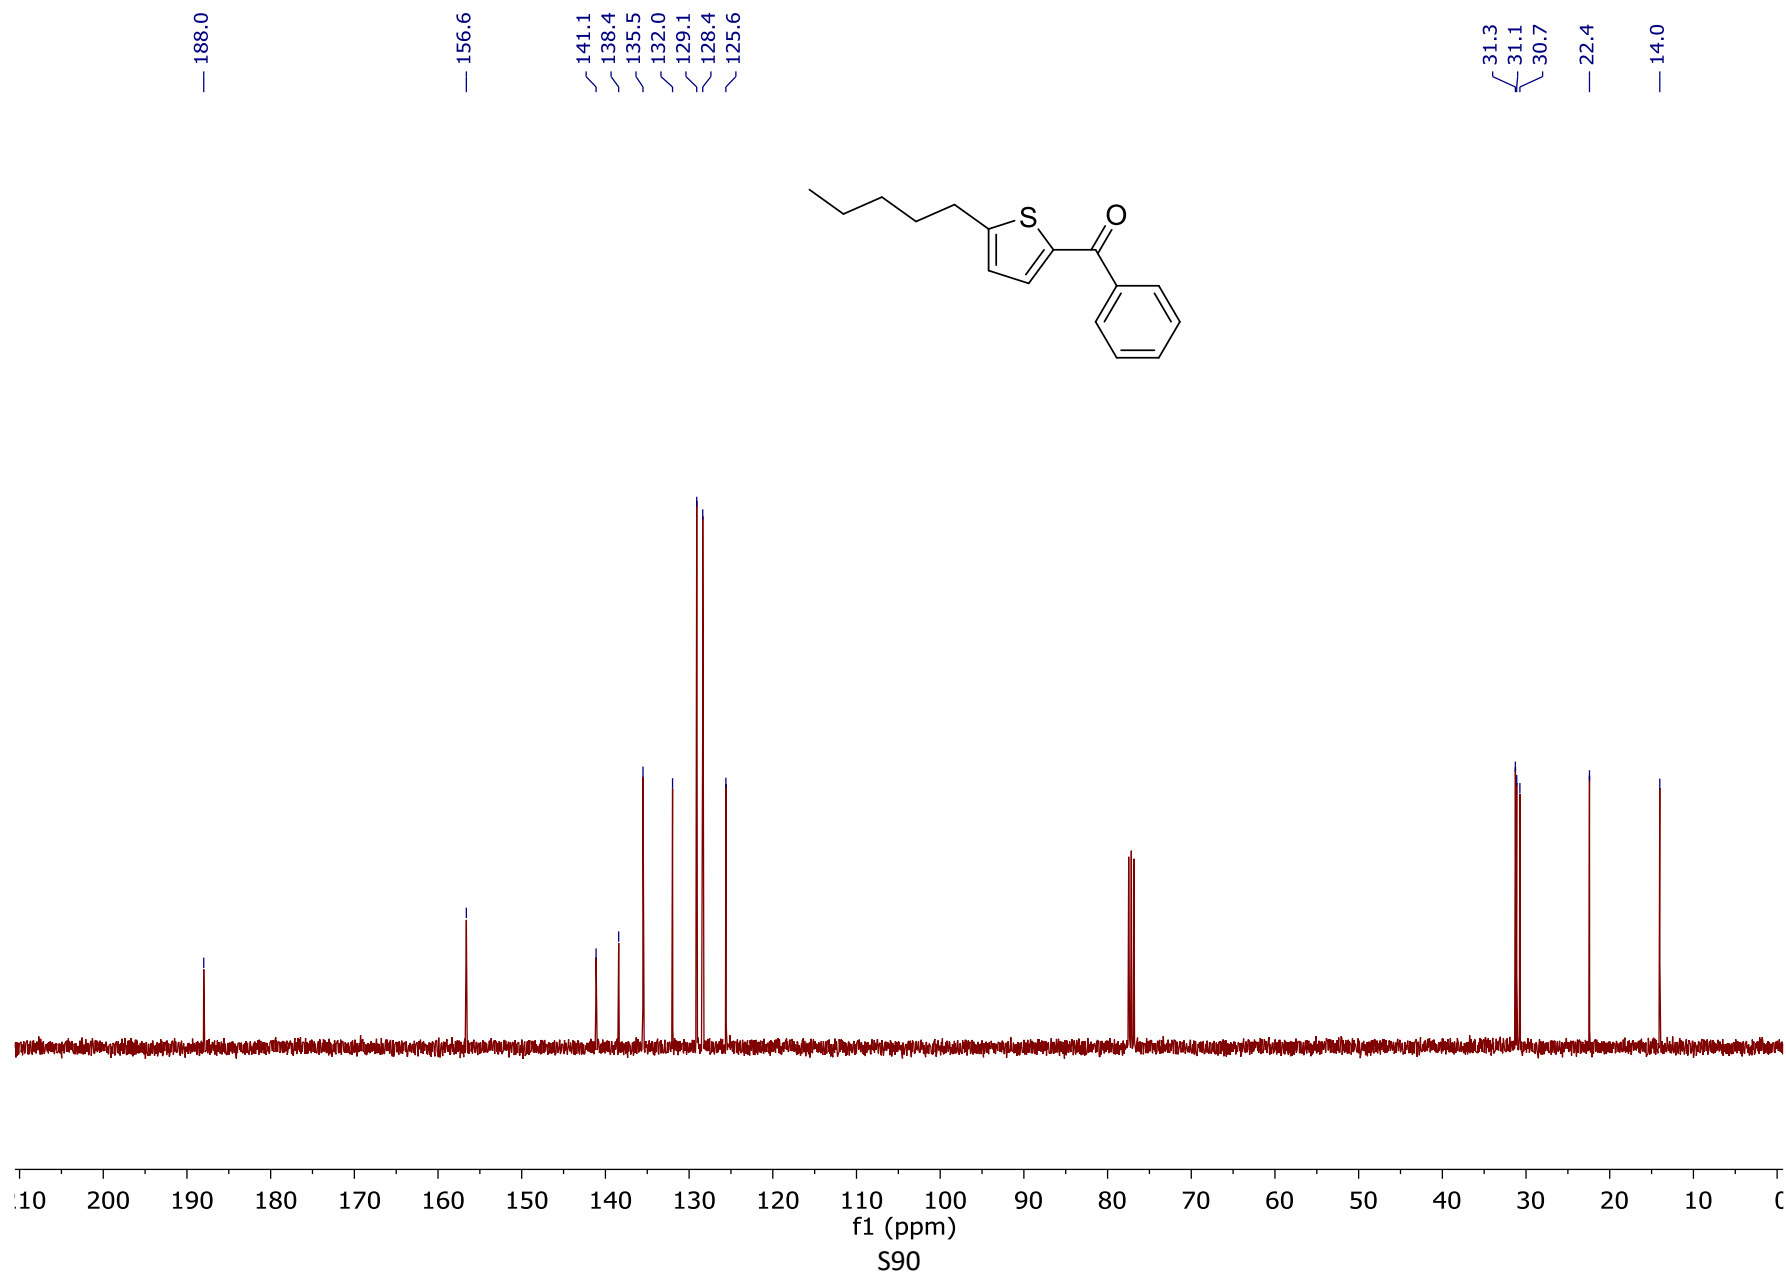

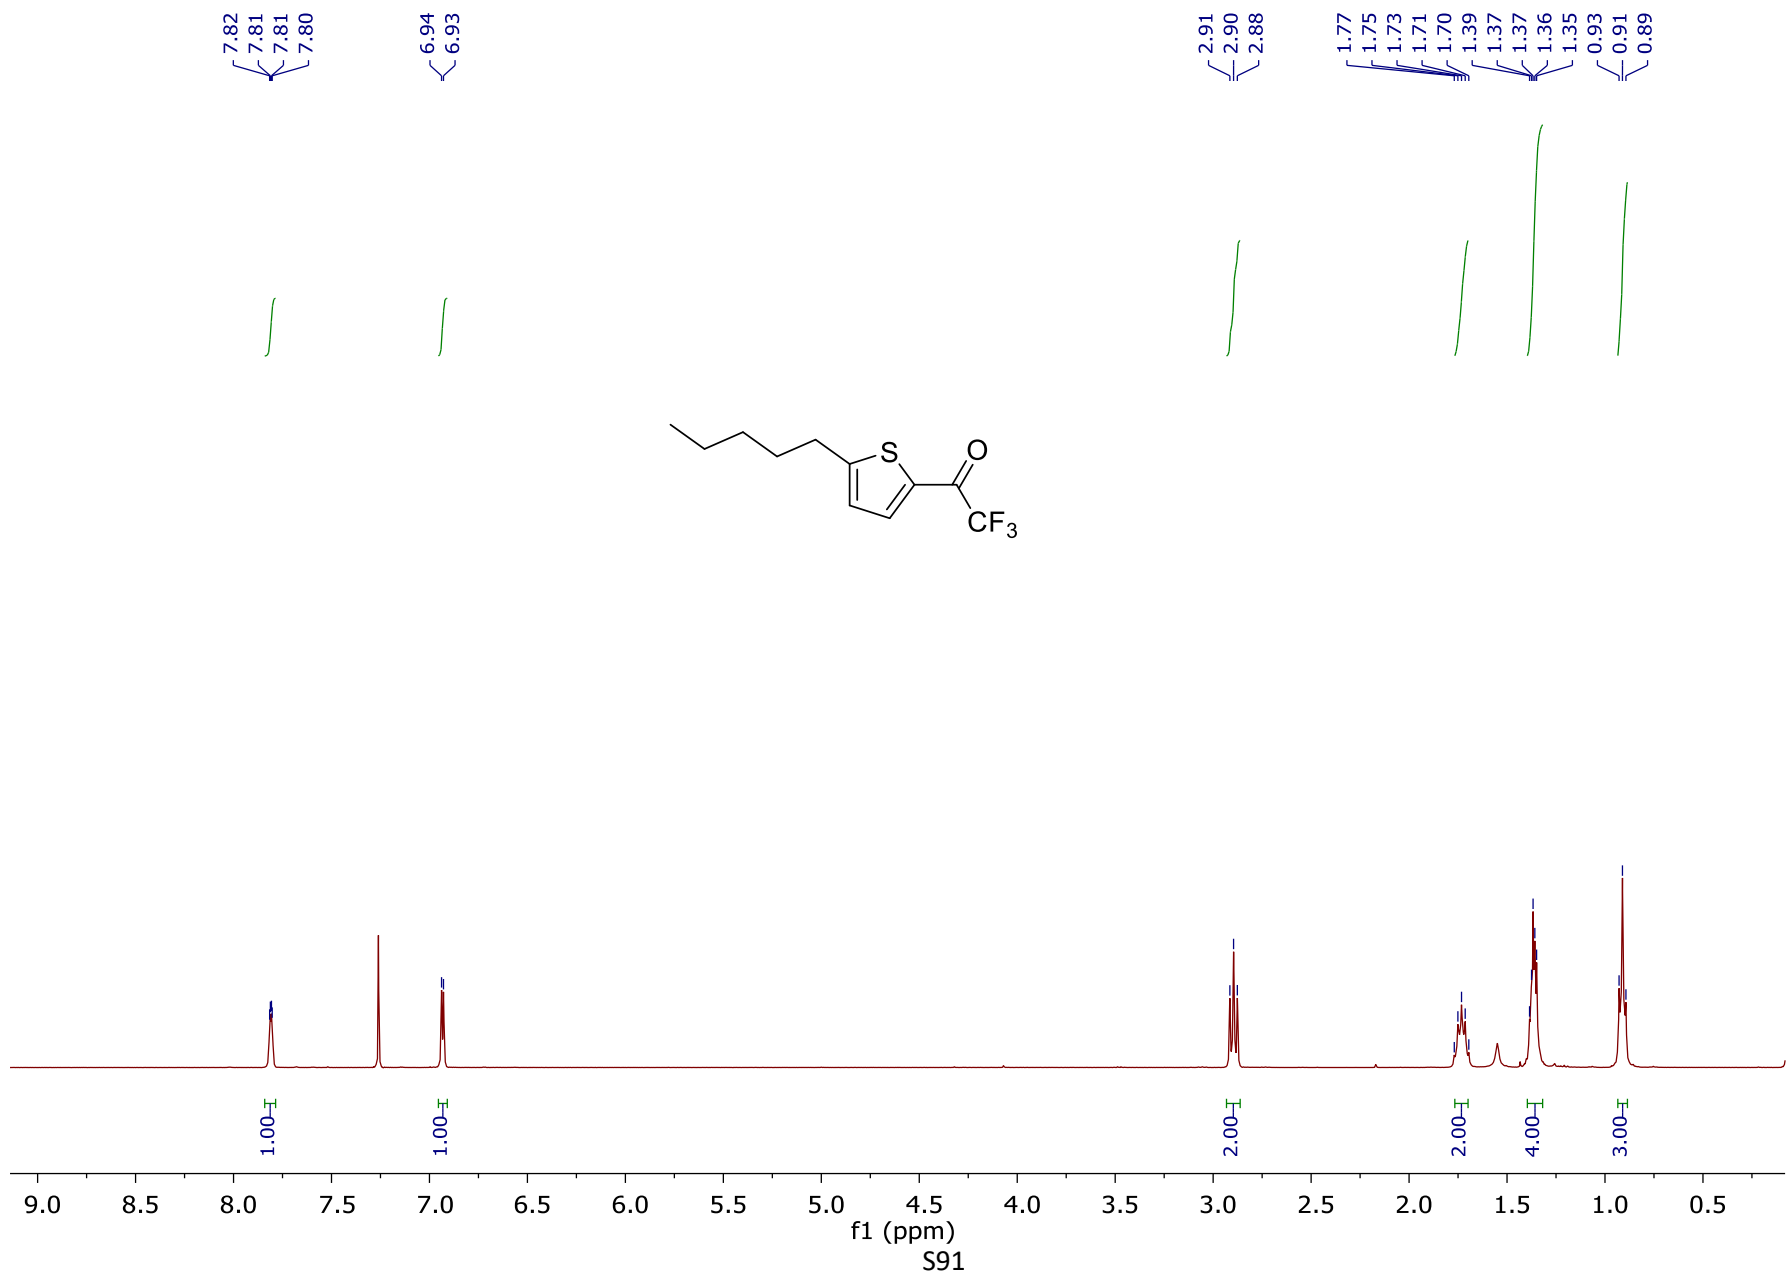

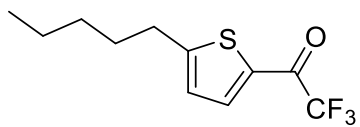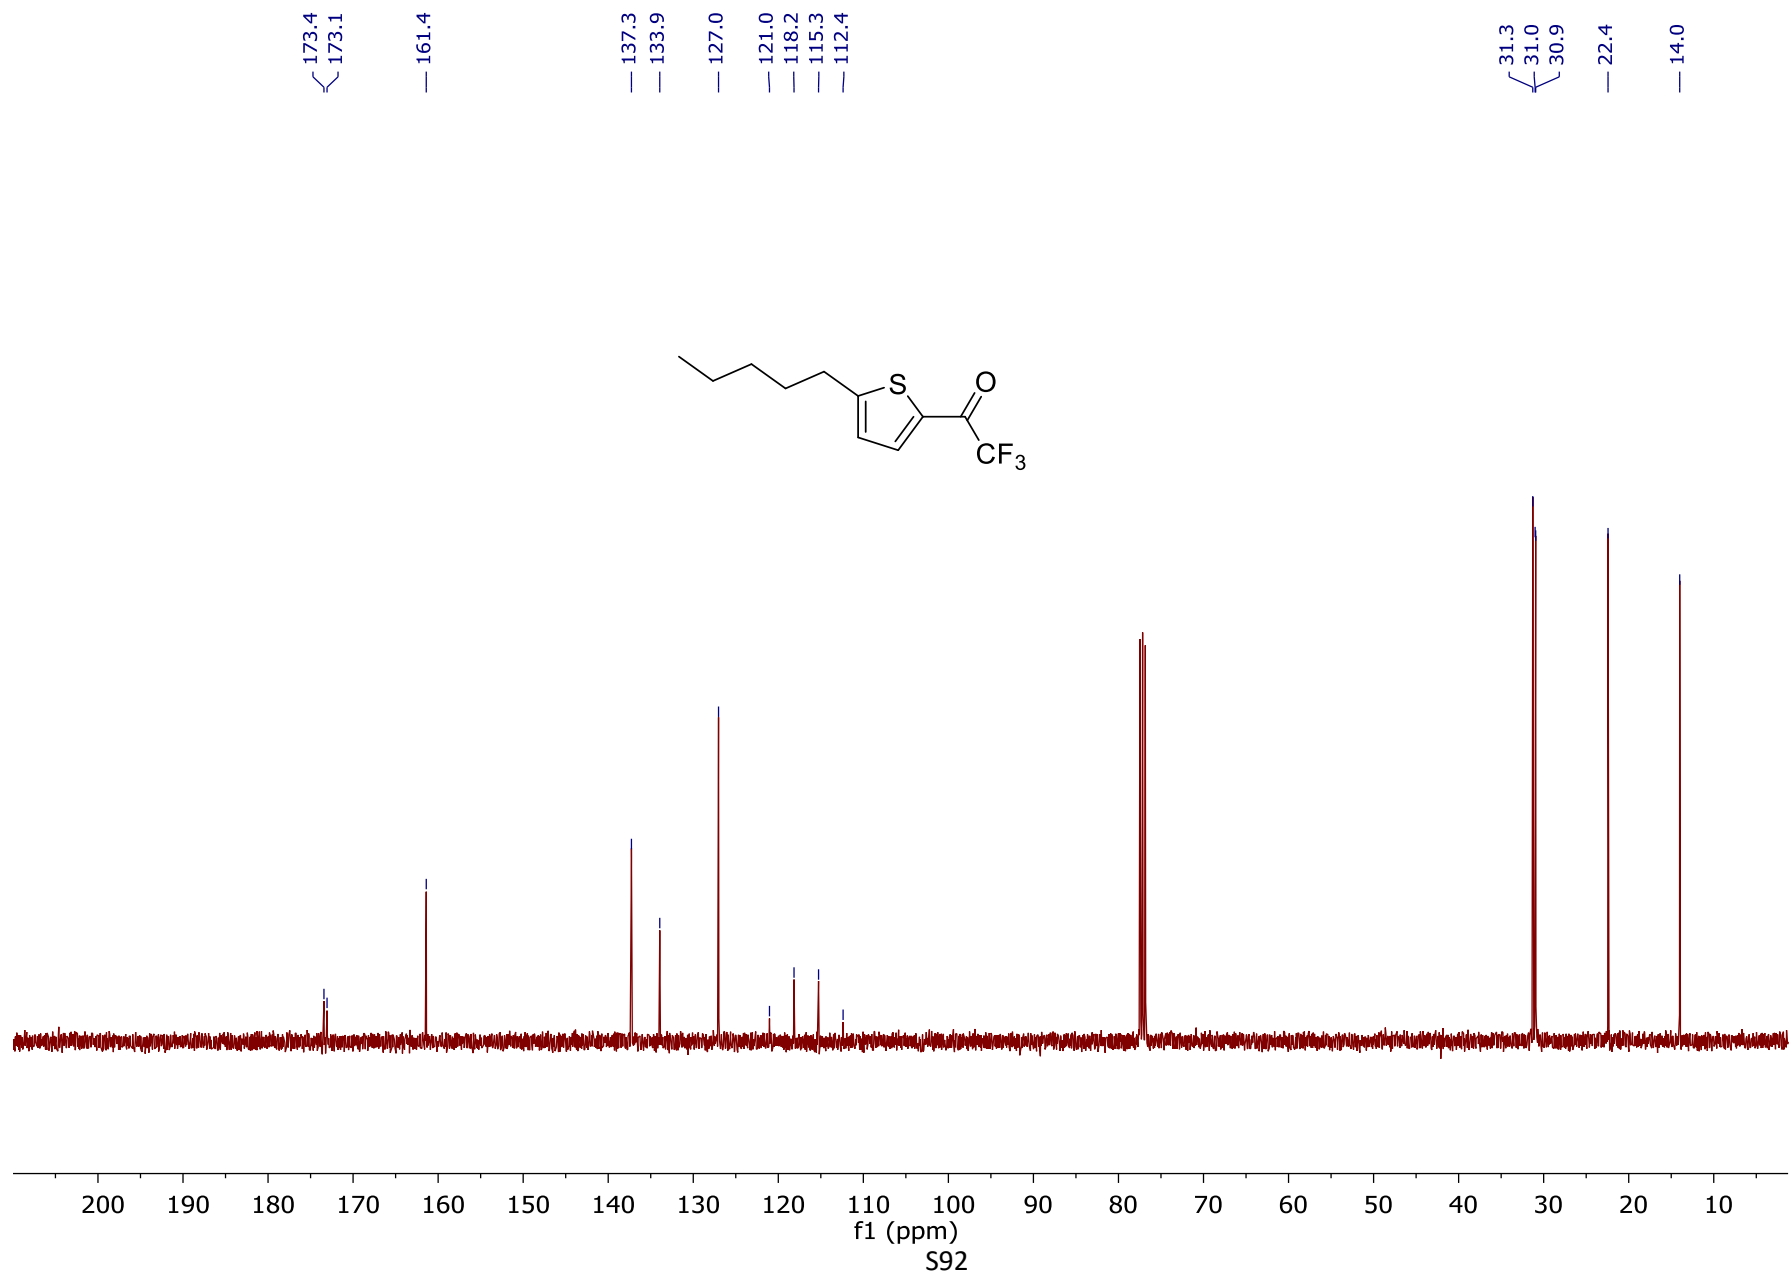

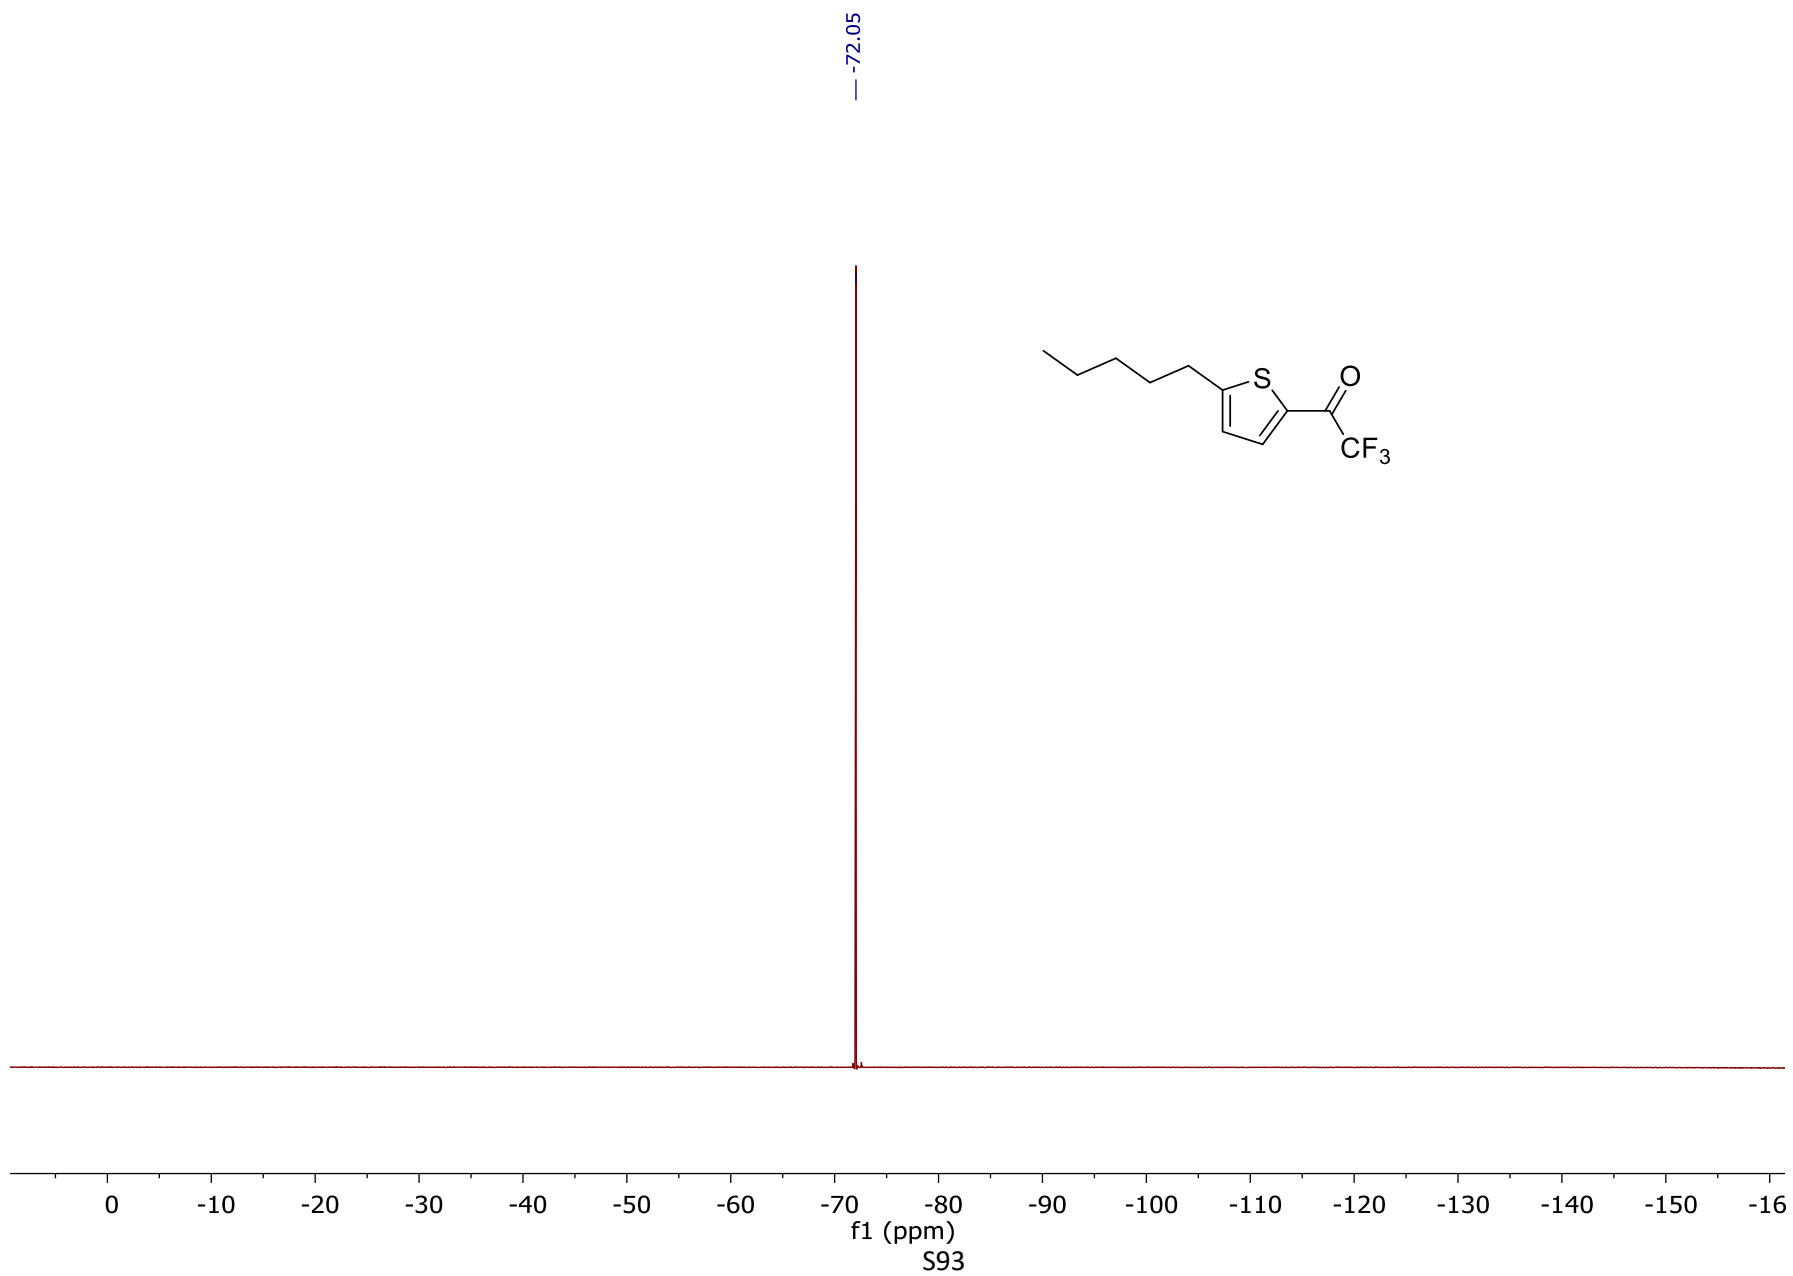

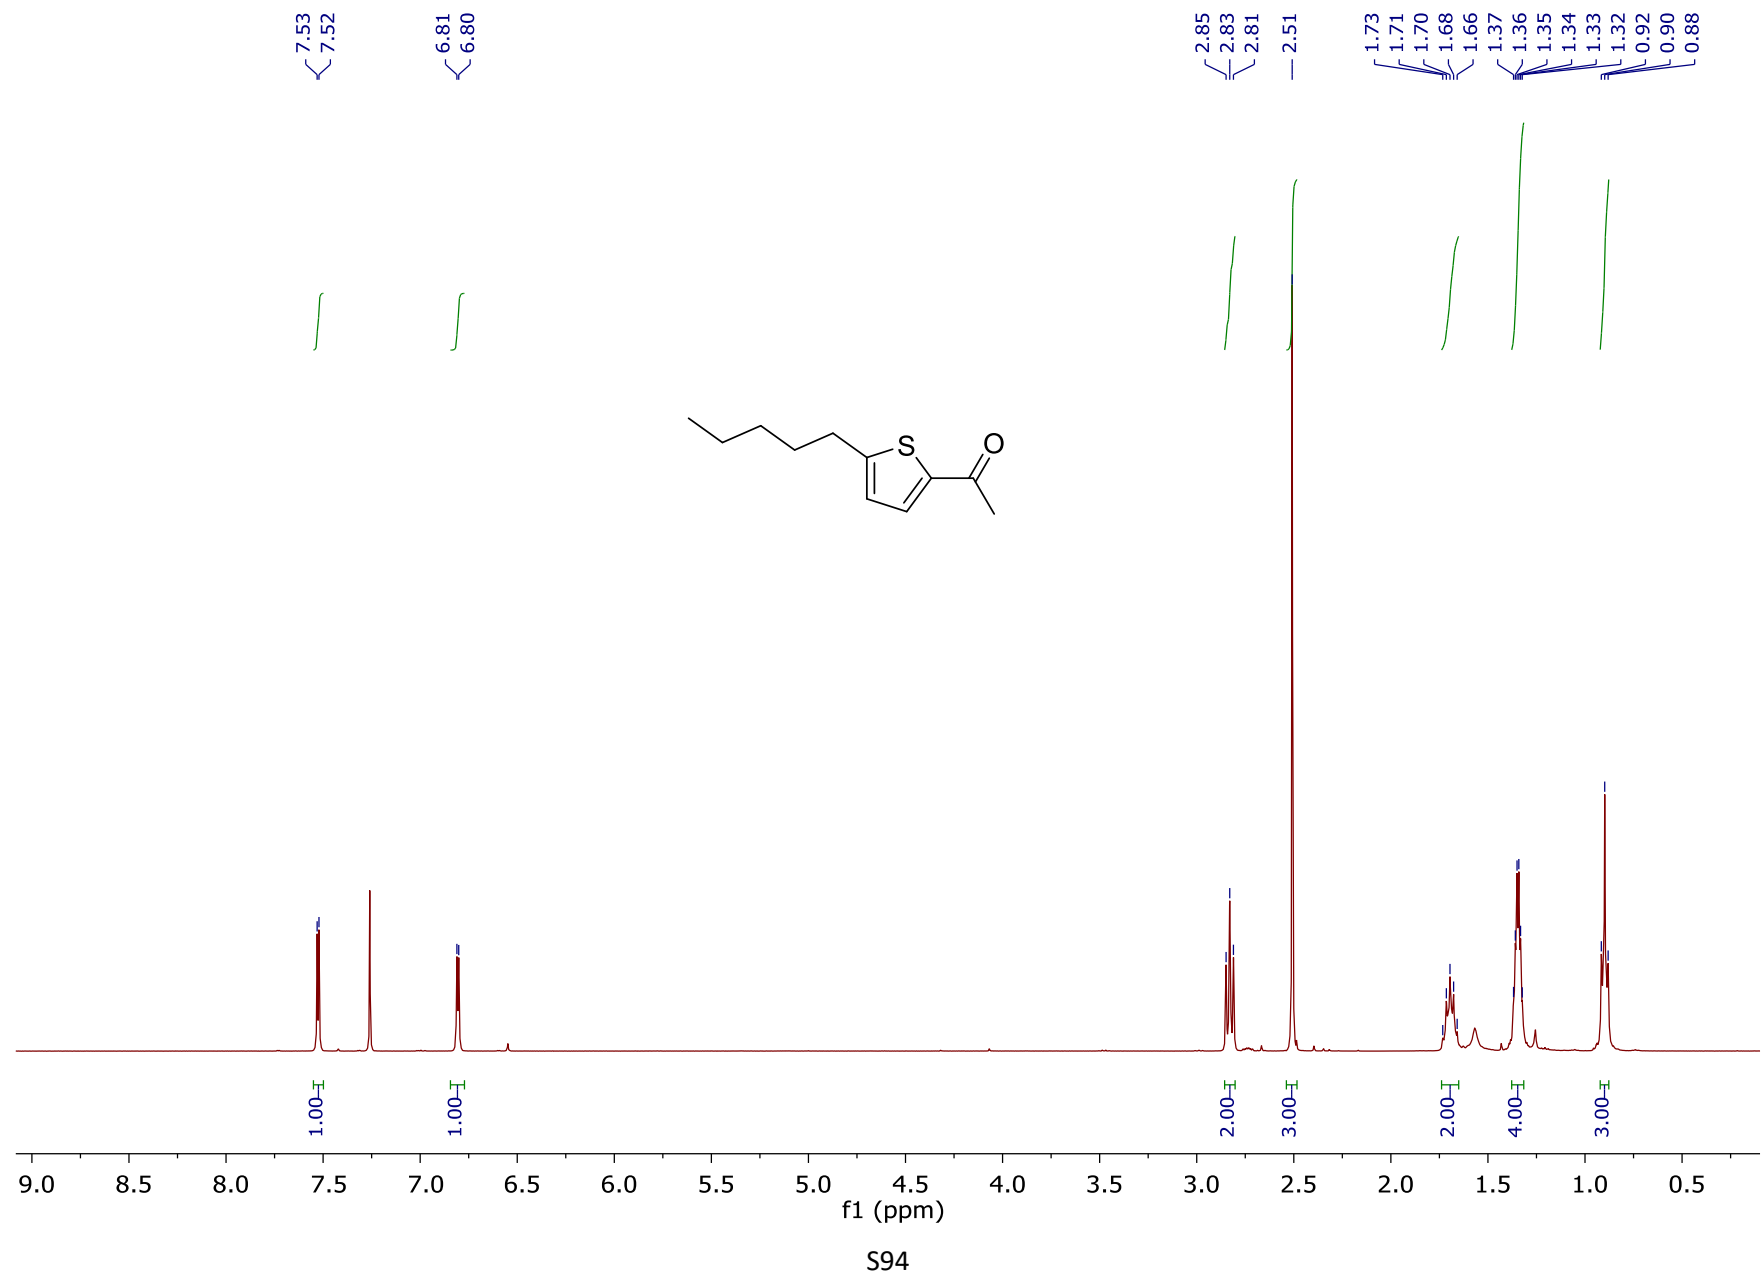

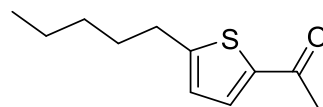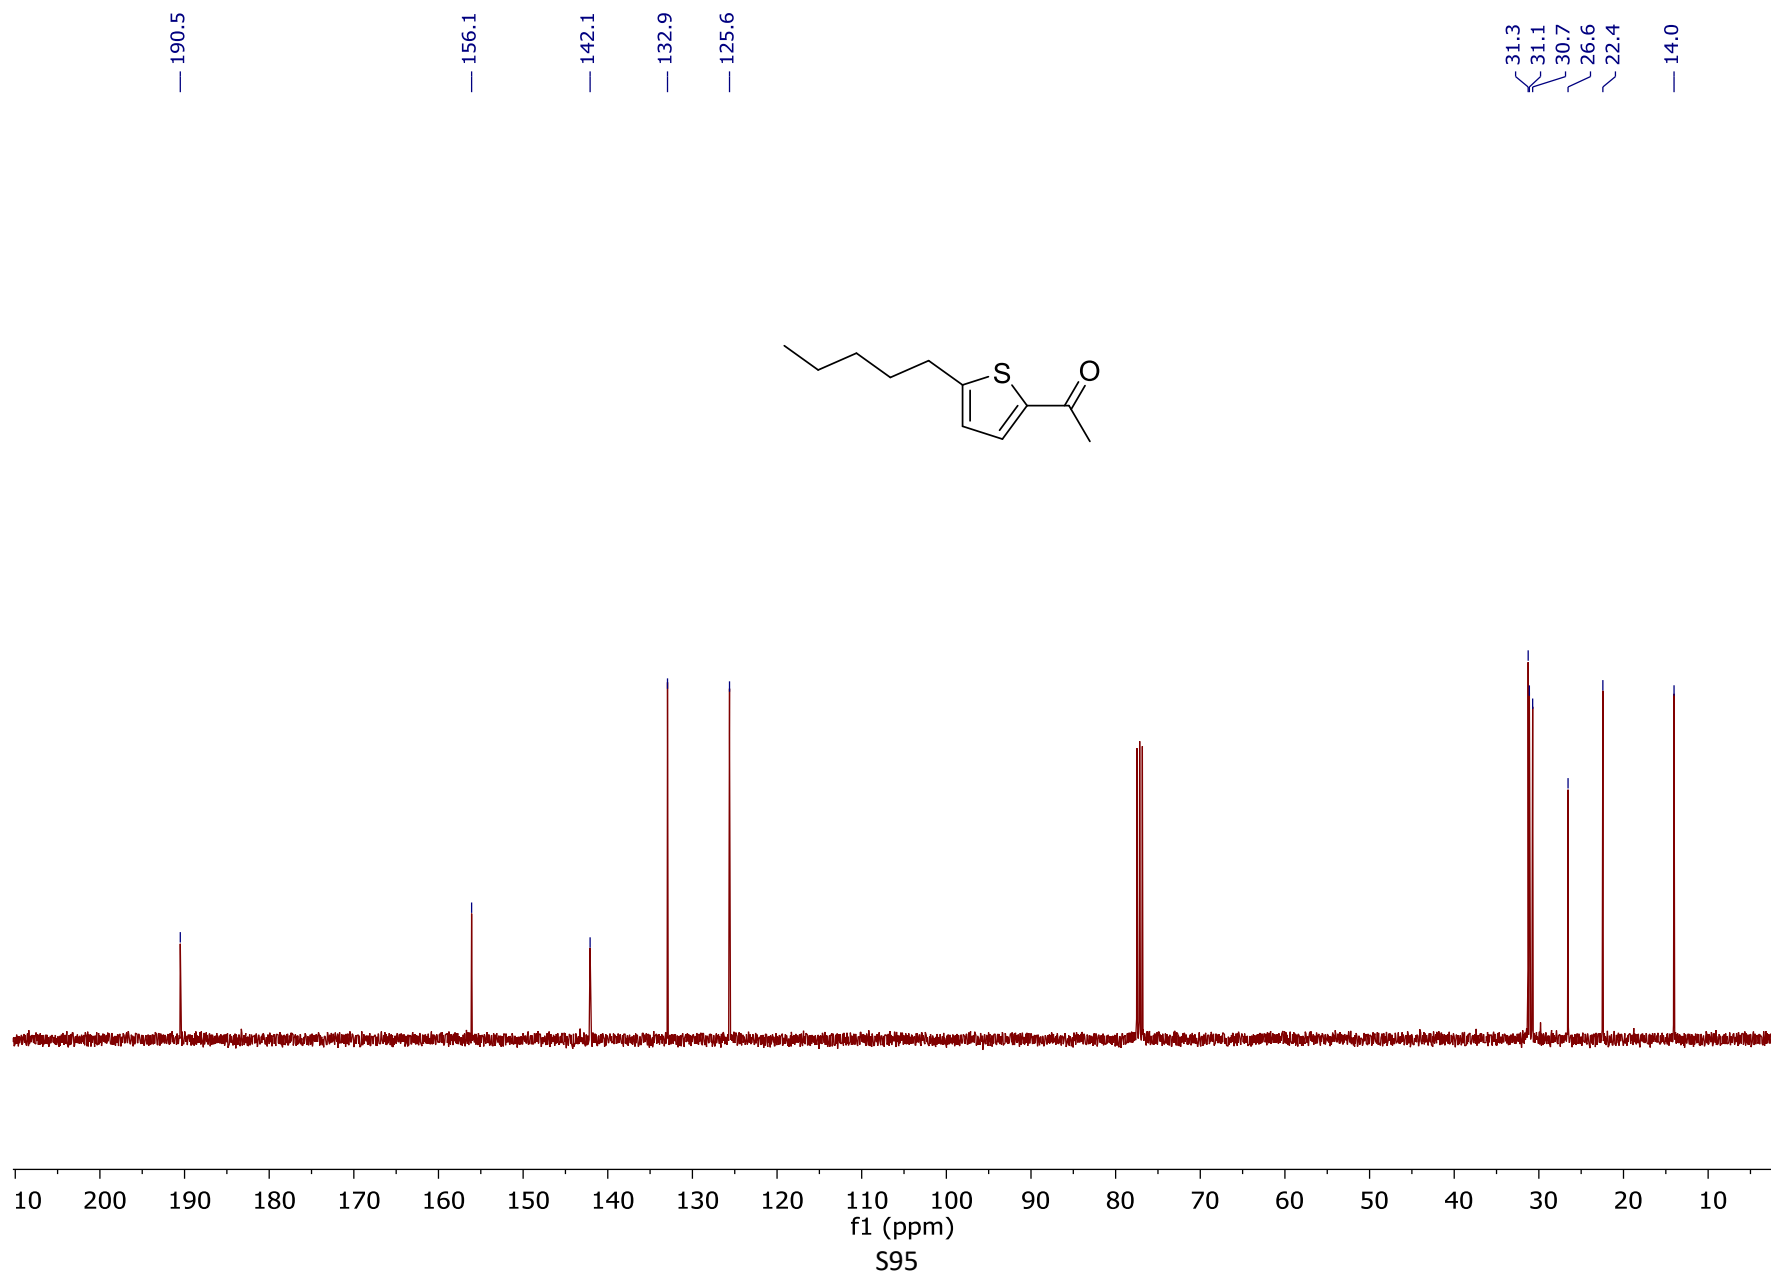

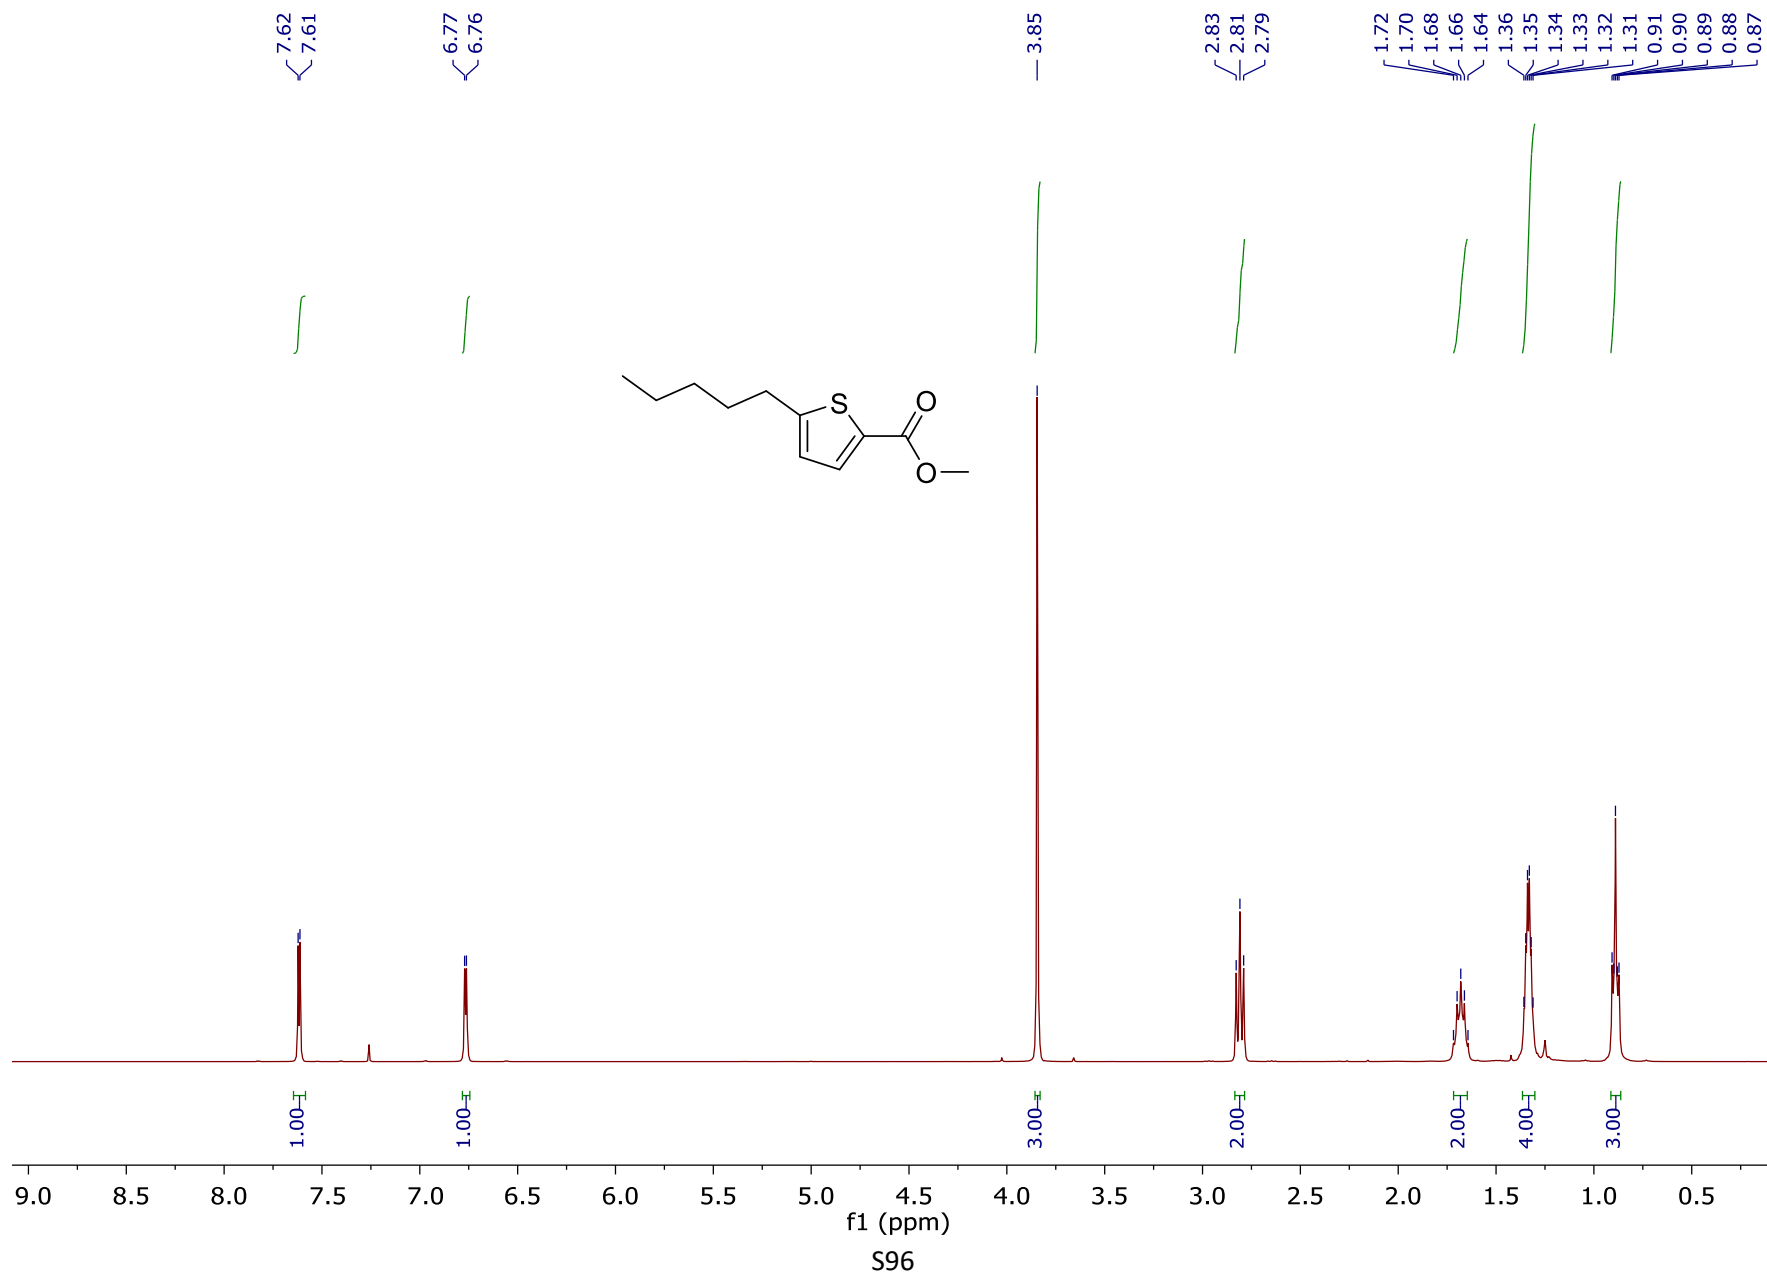



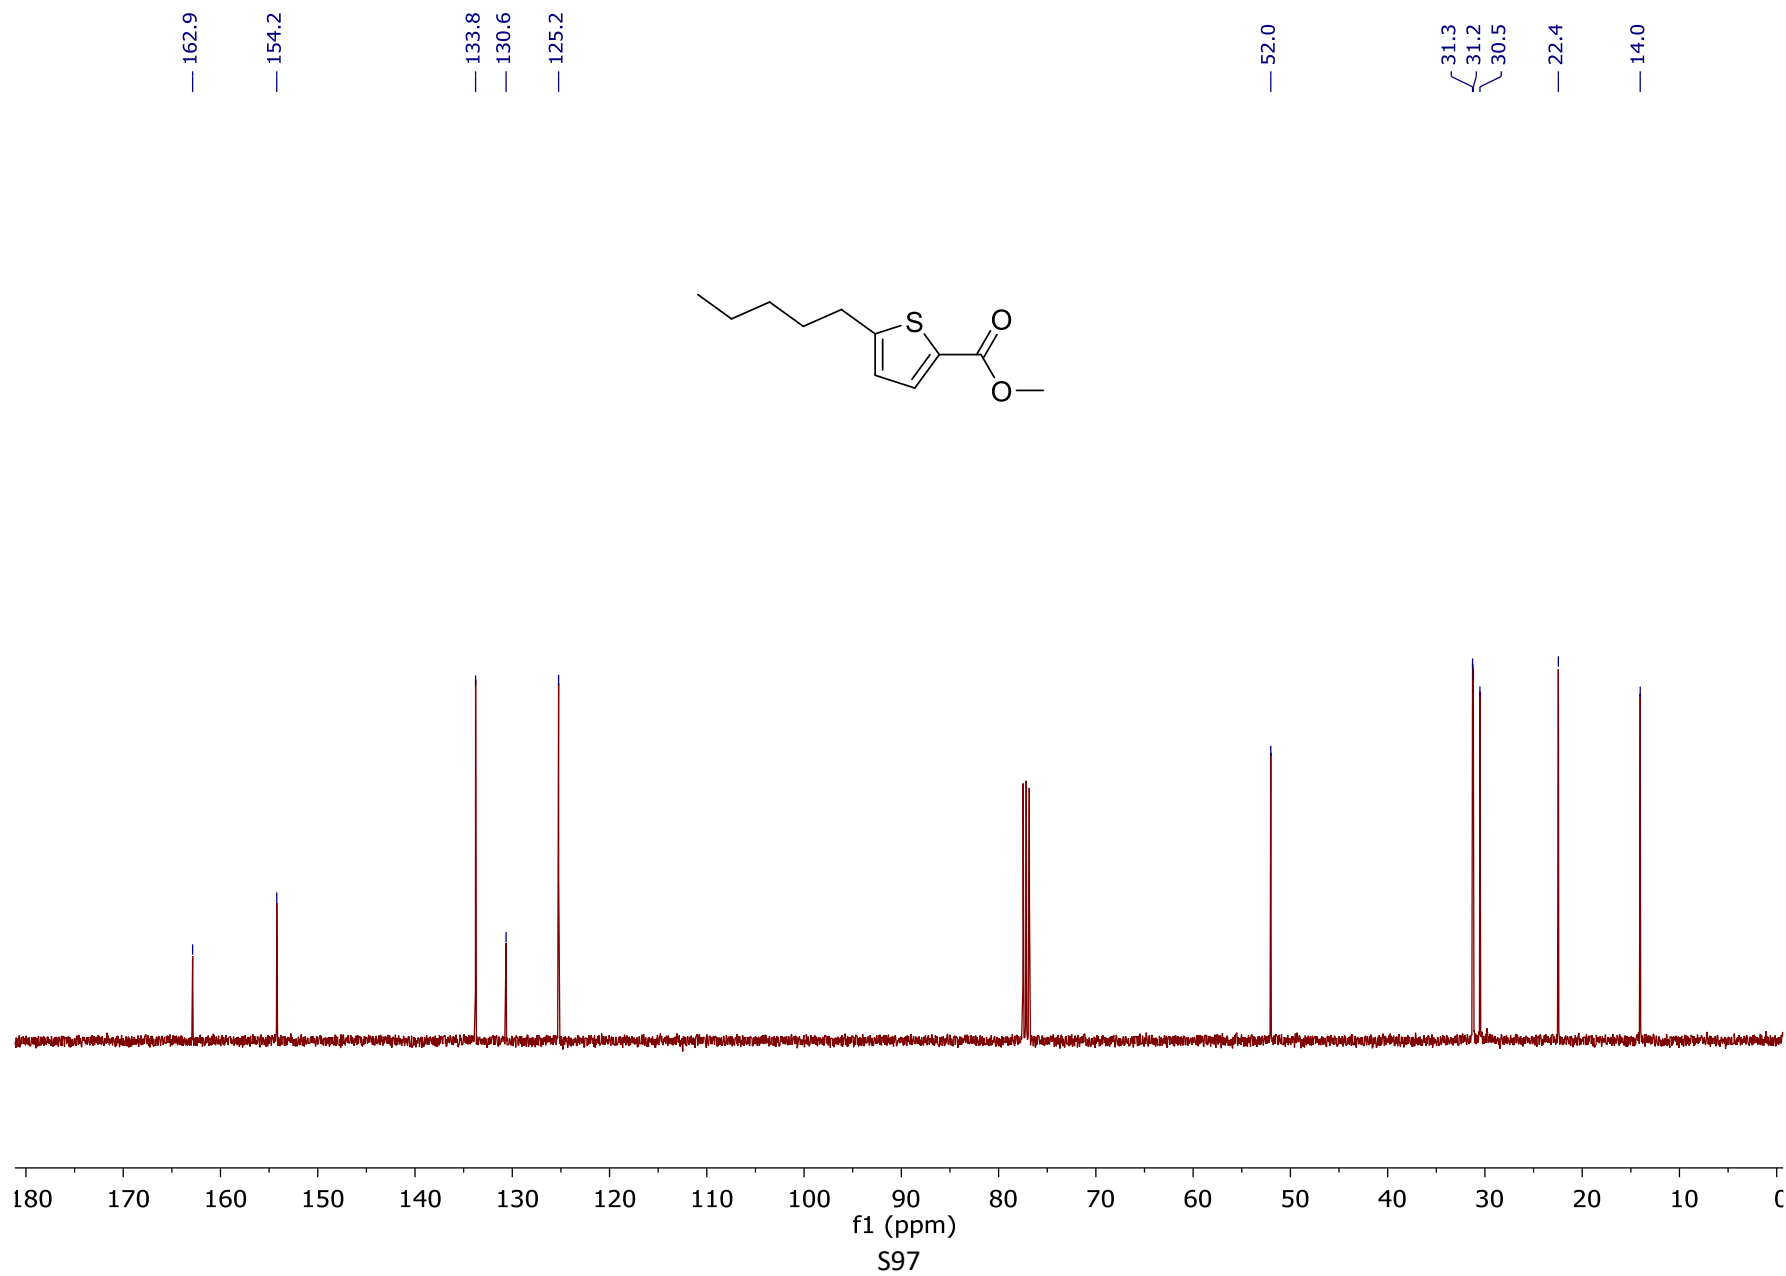

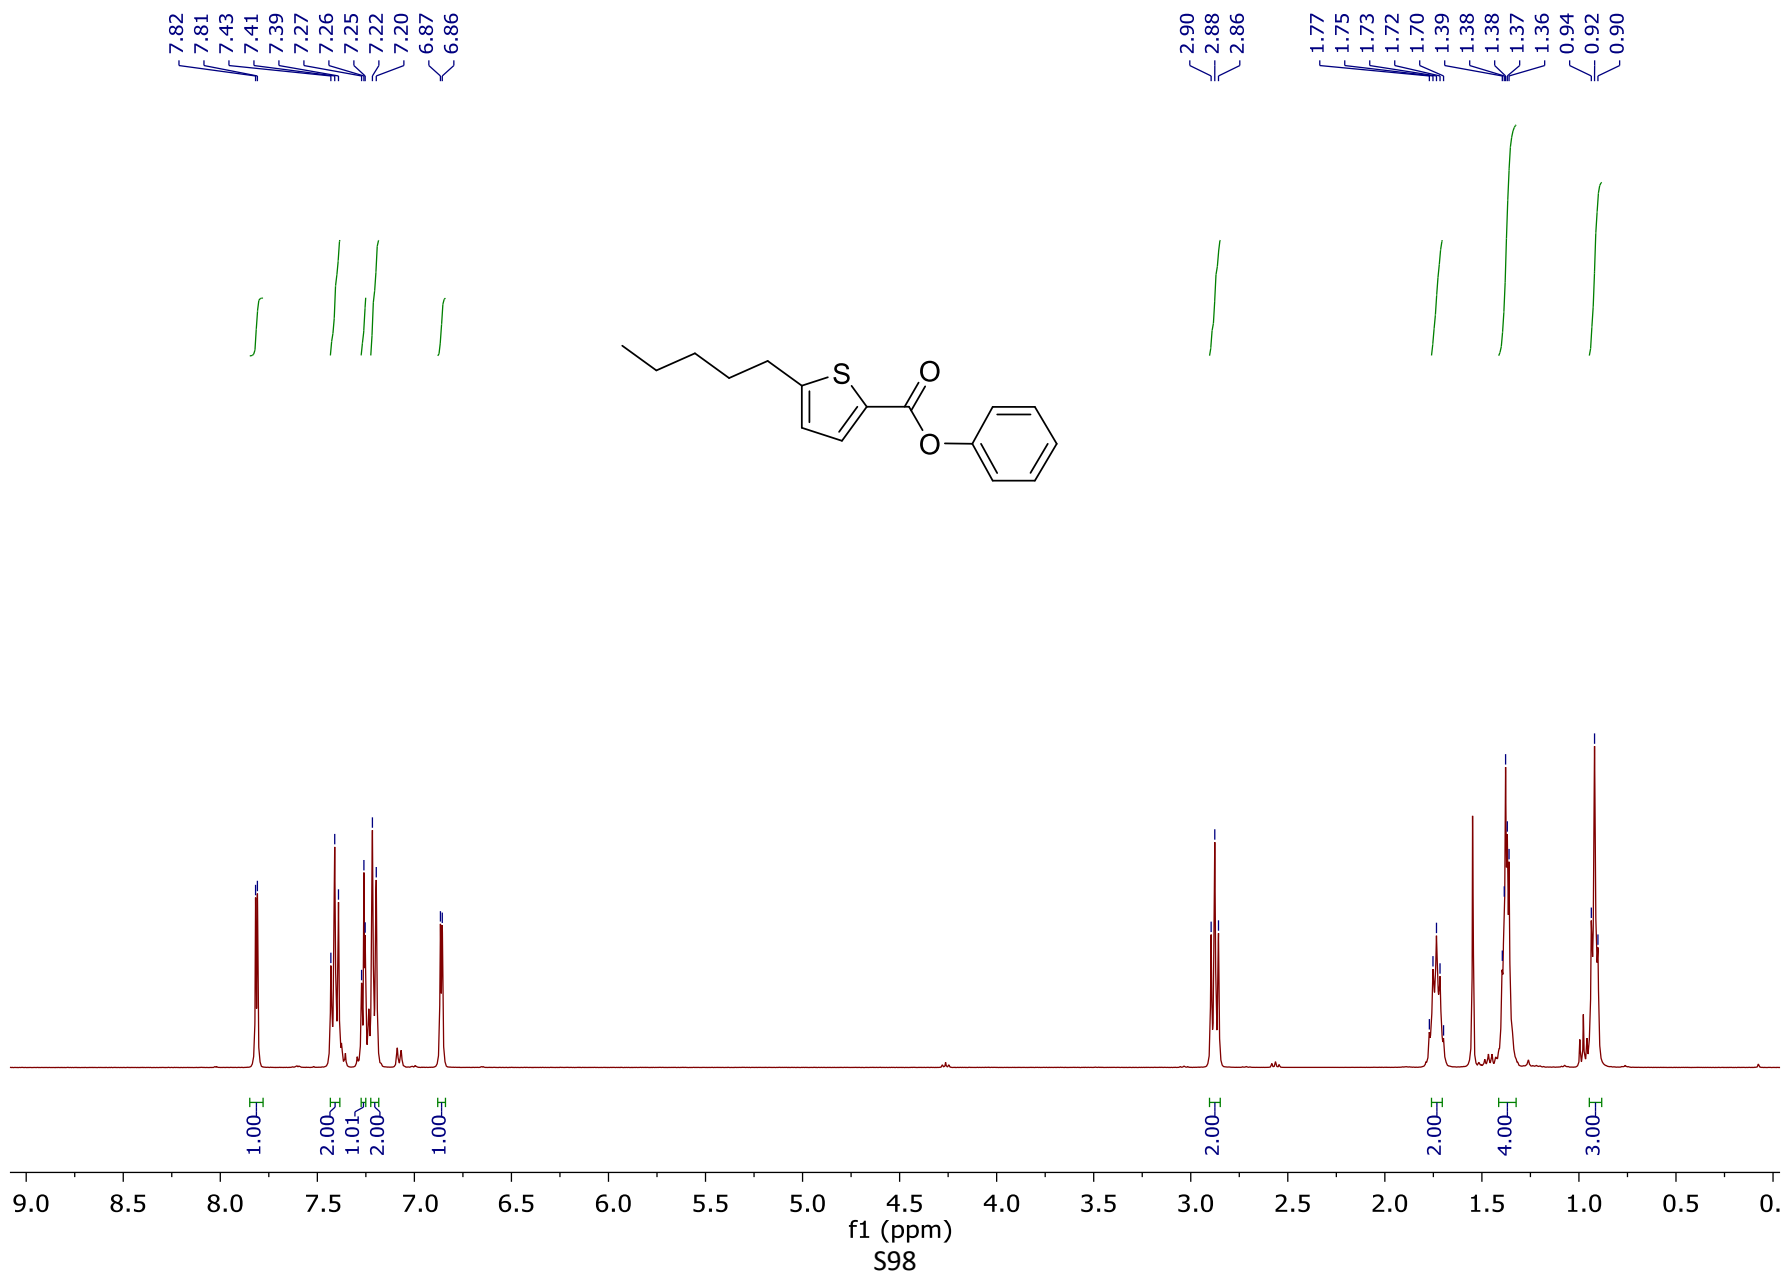

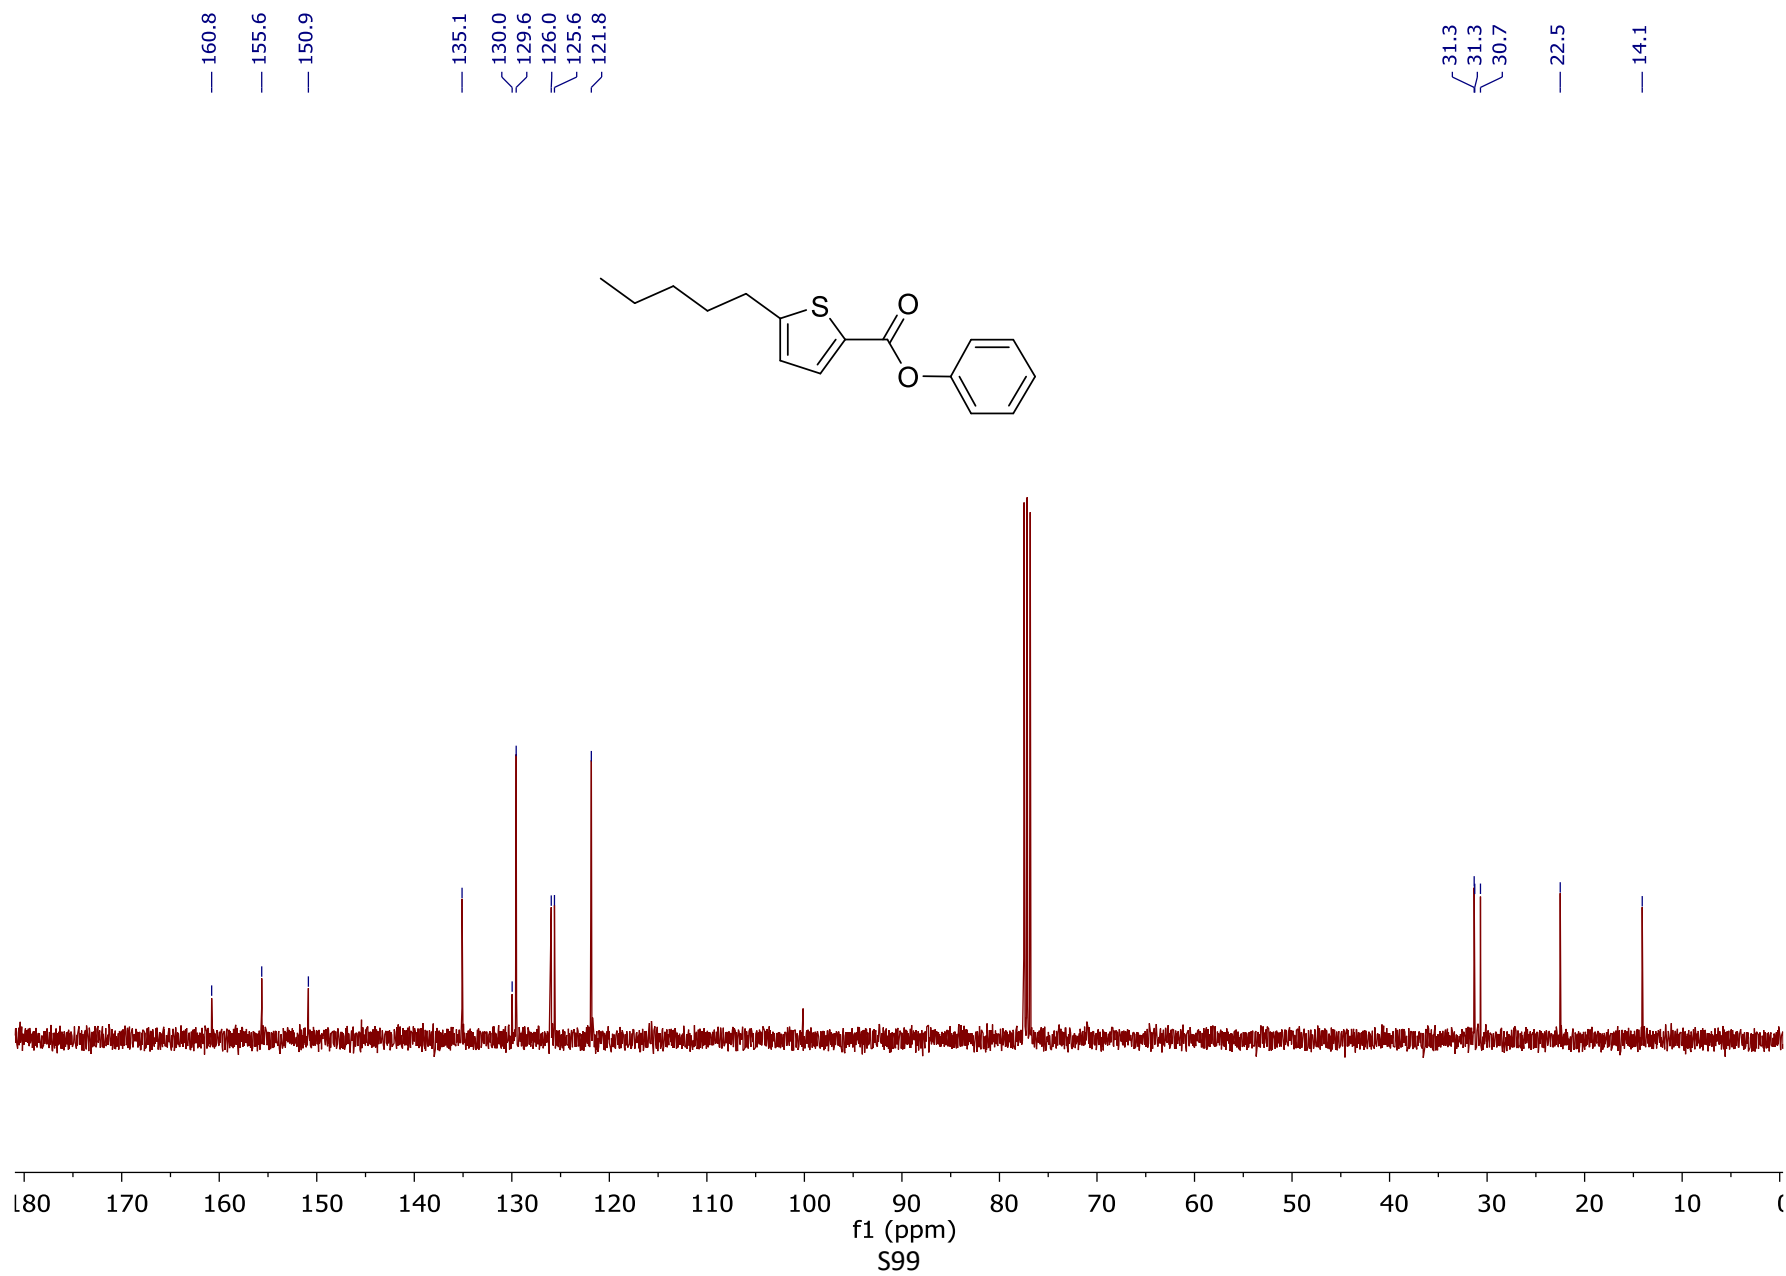

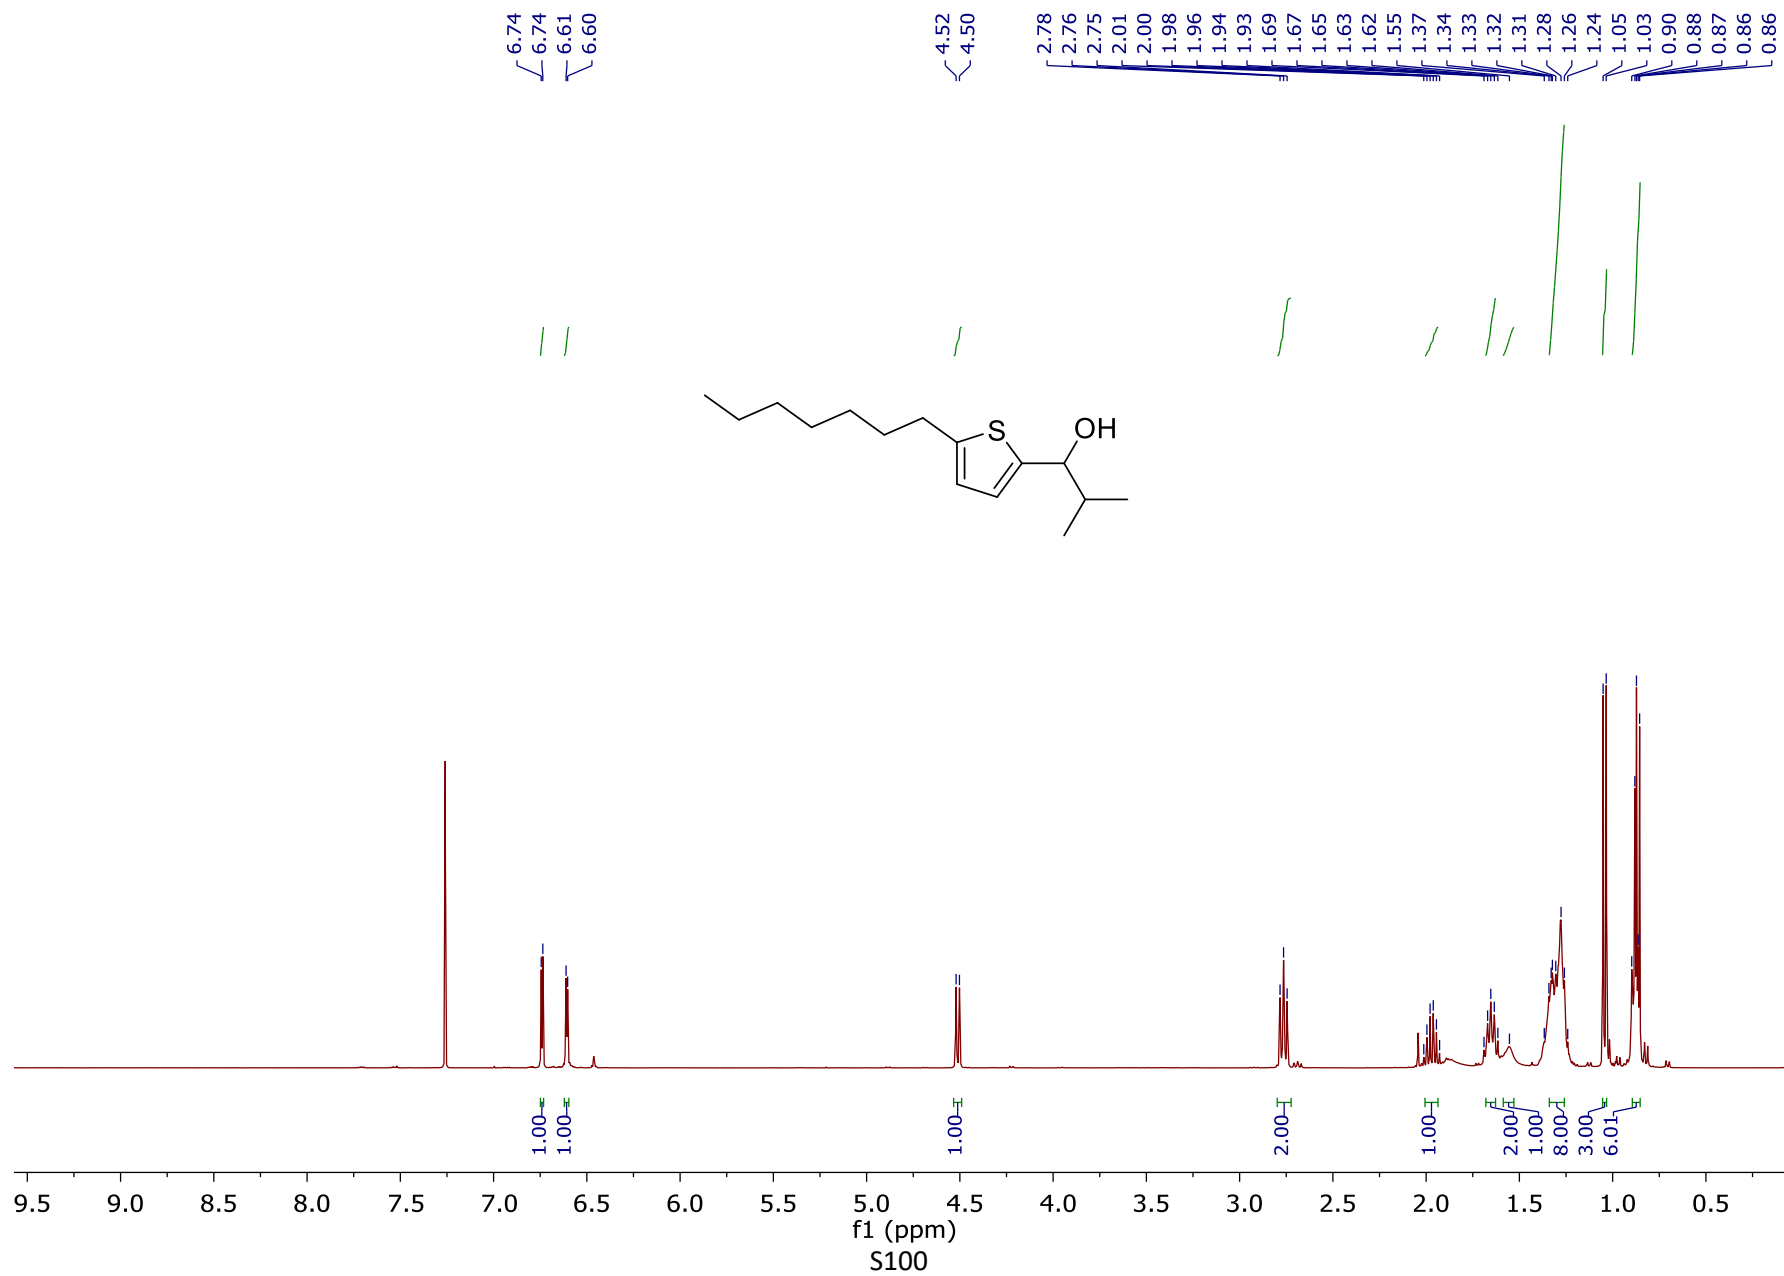

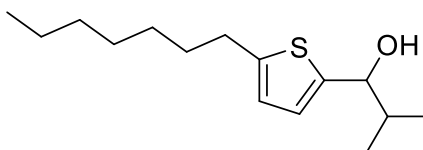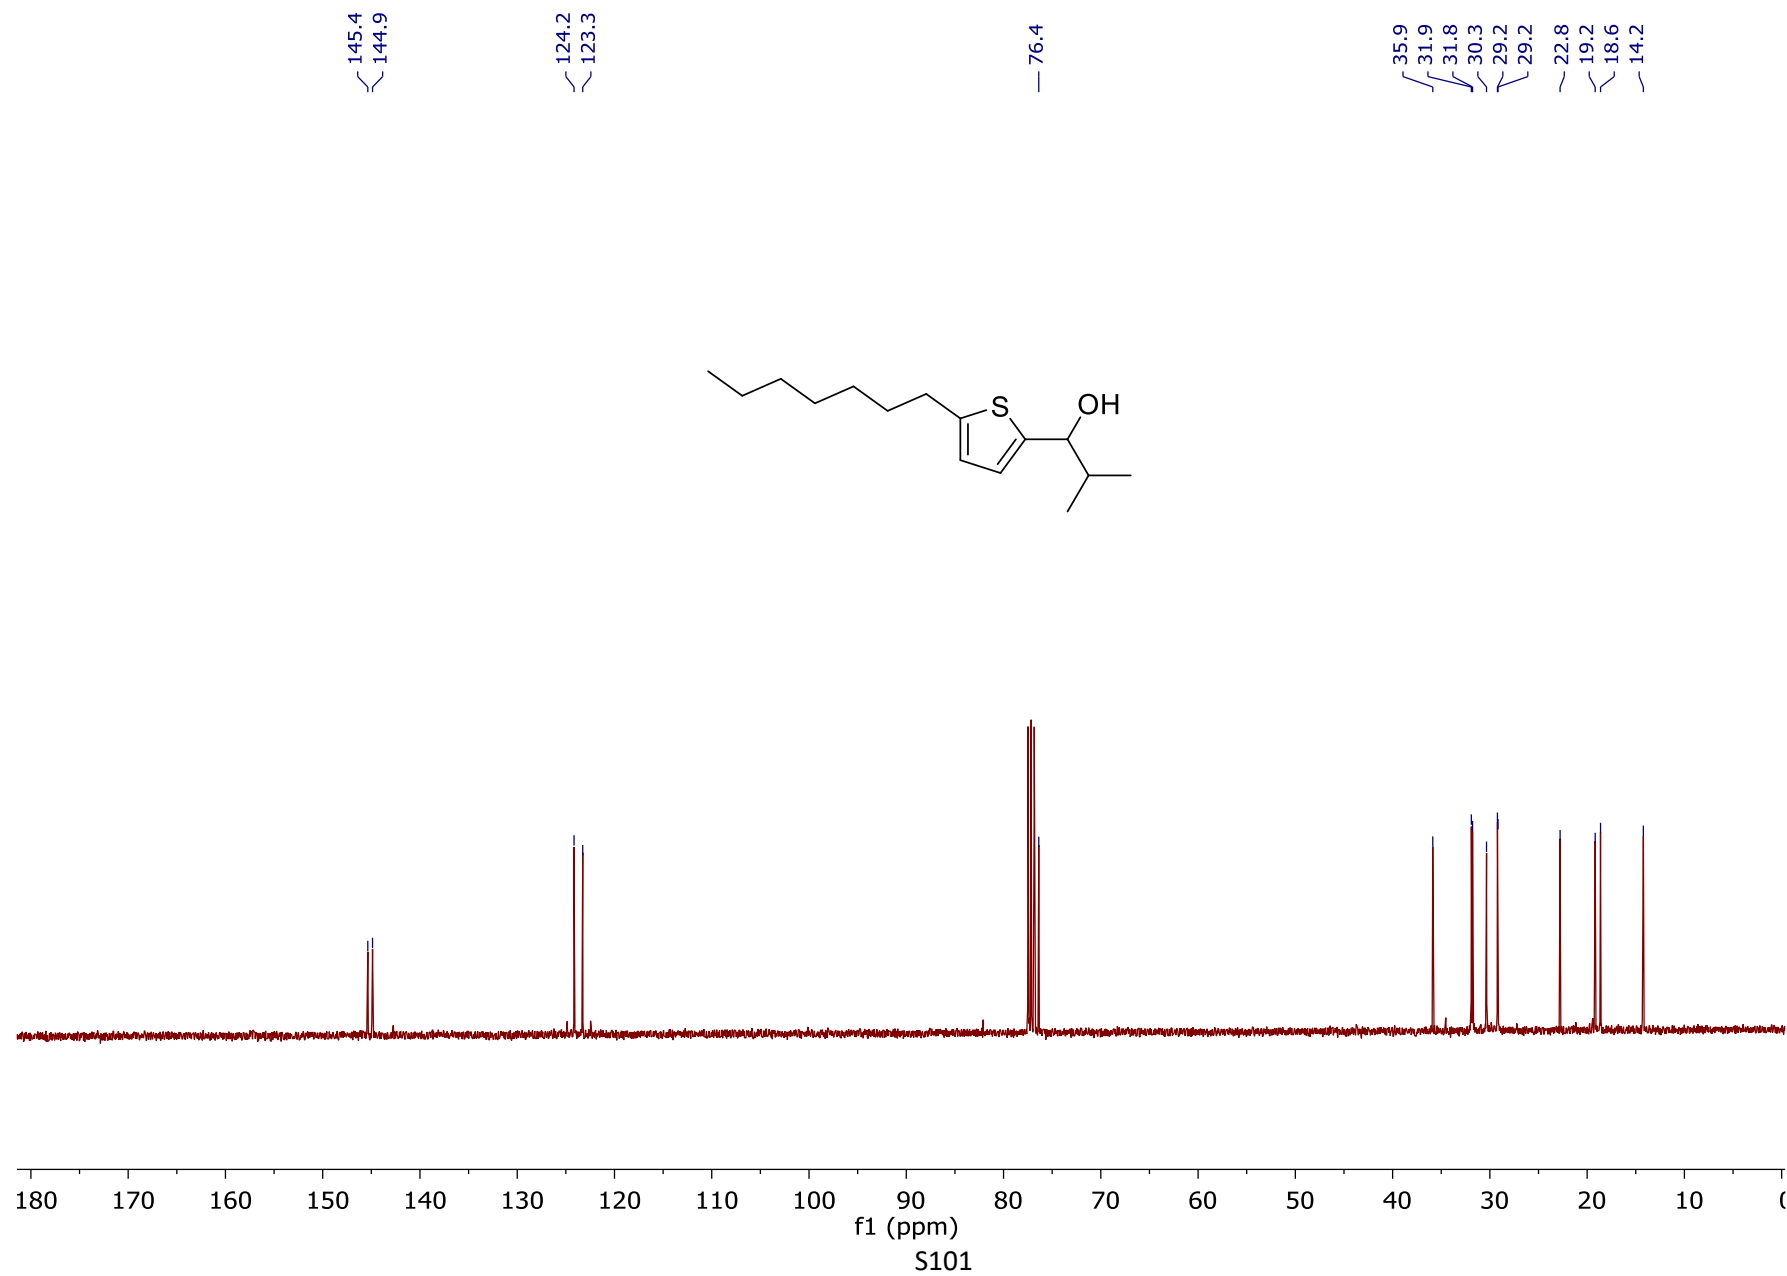

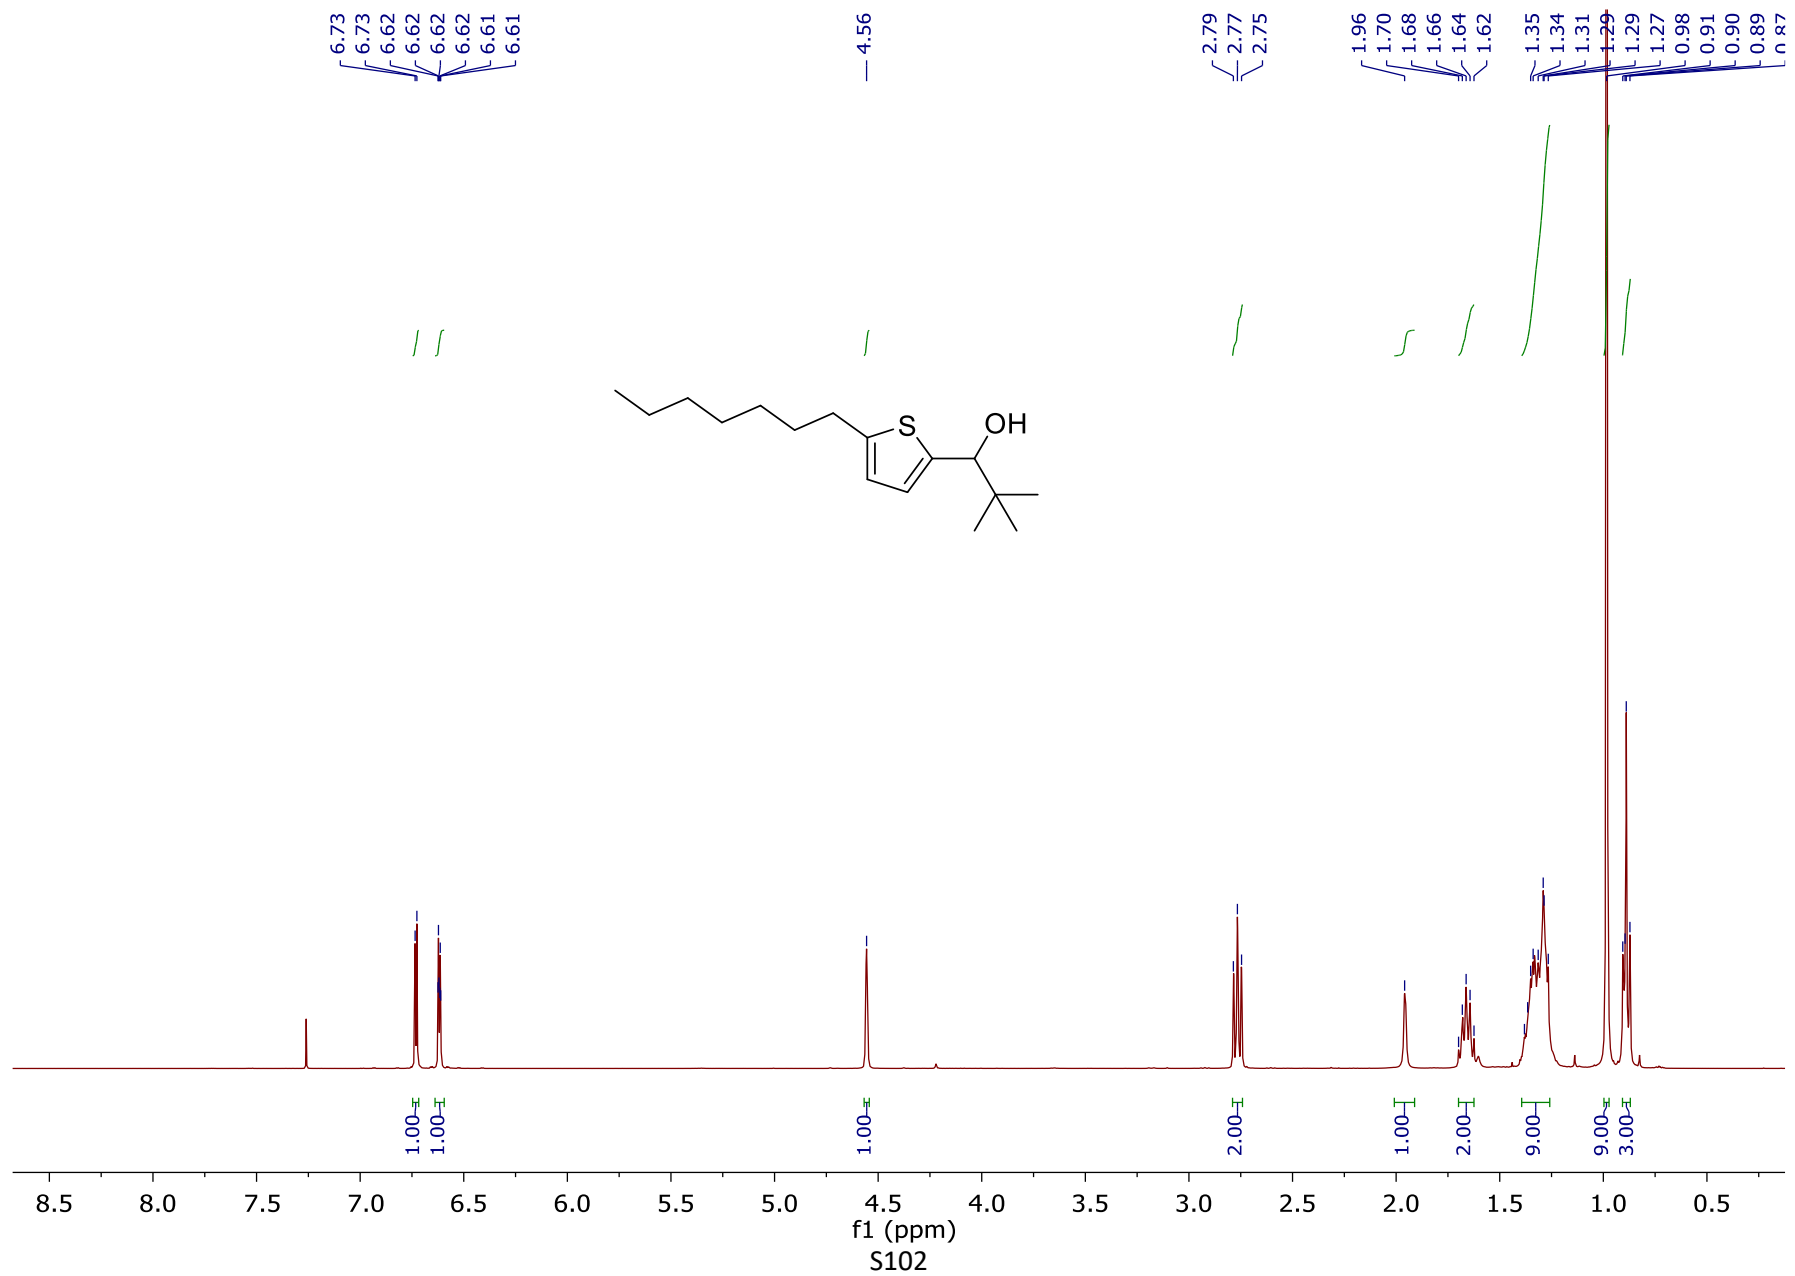

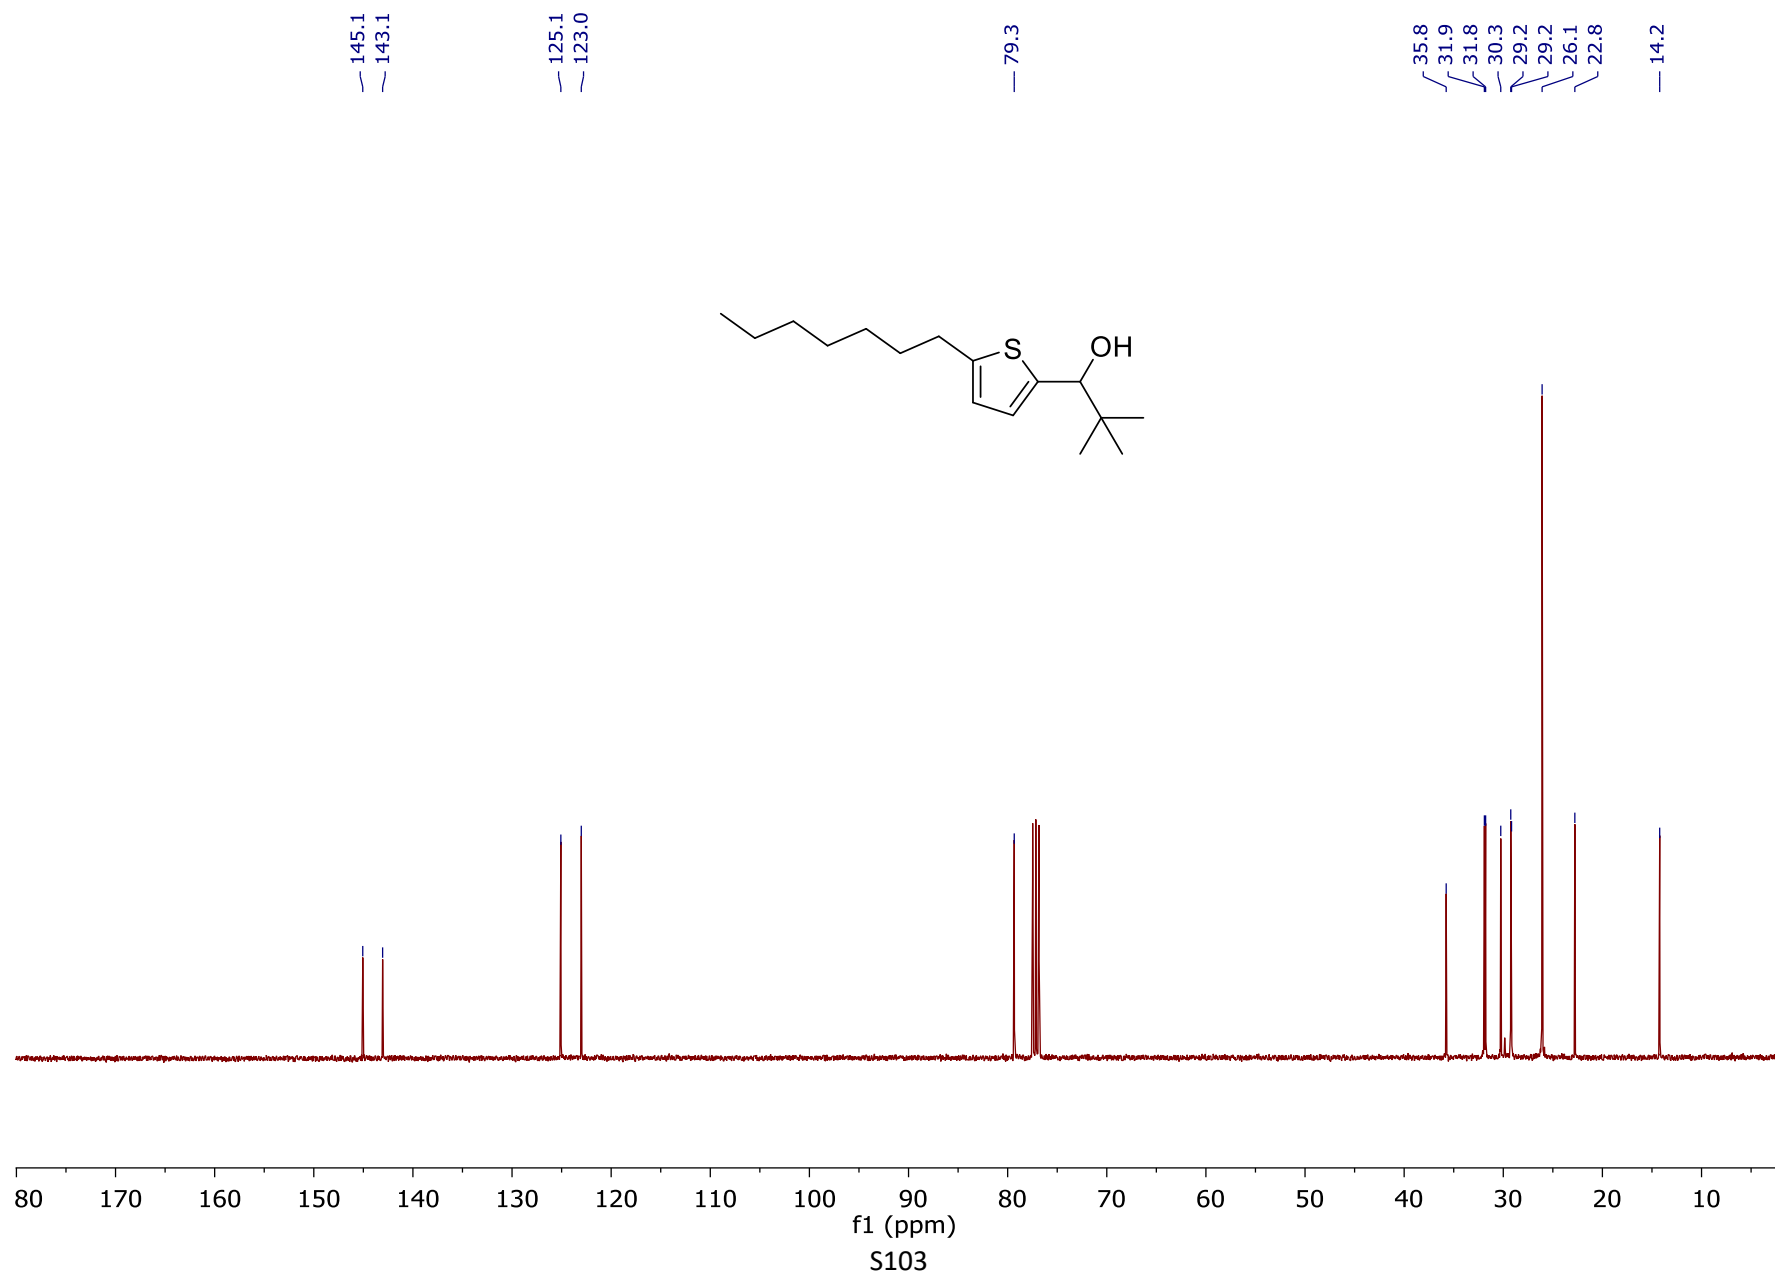

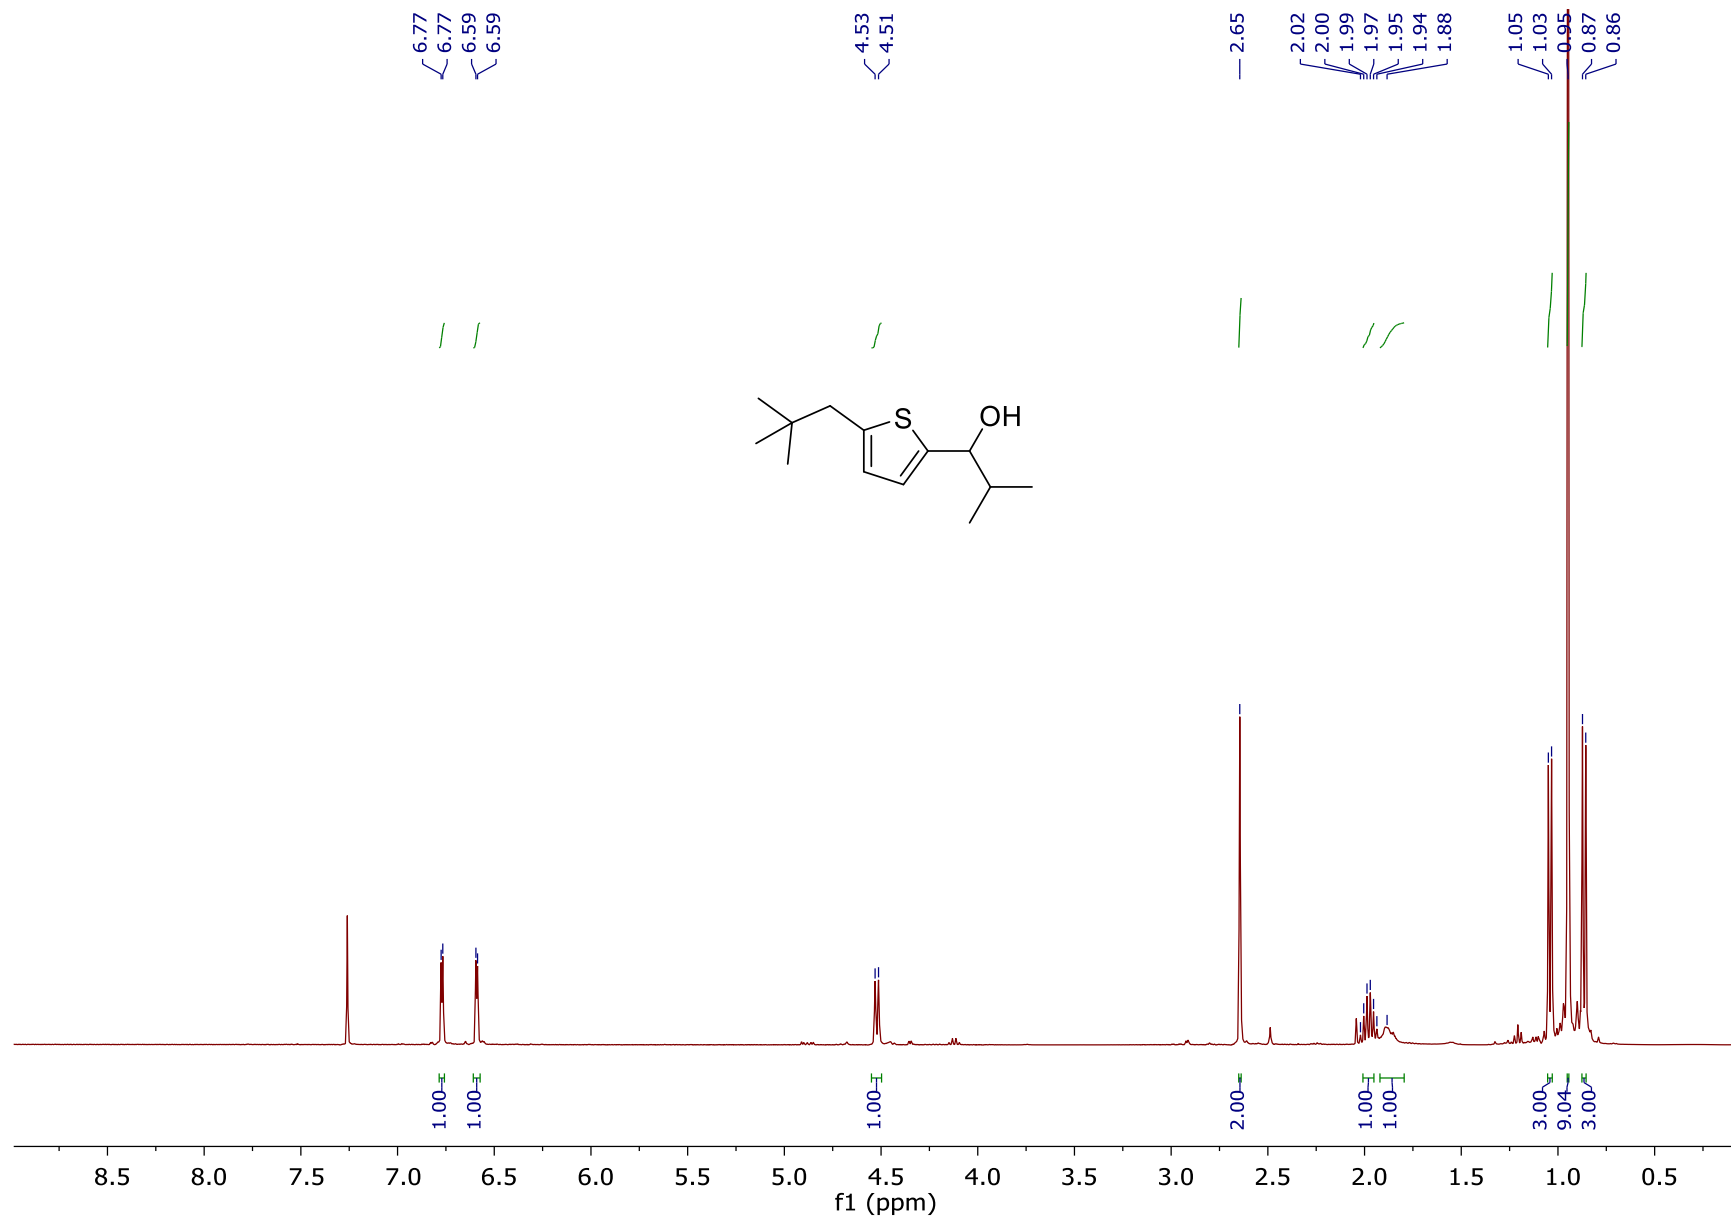

S104



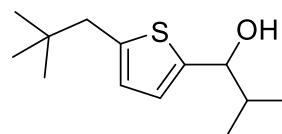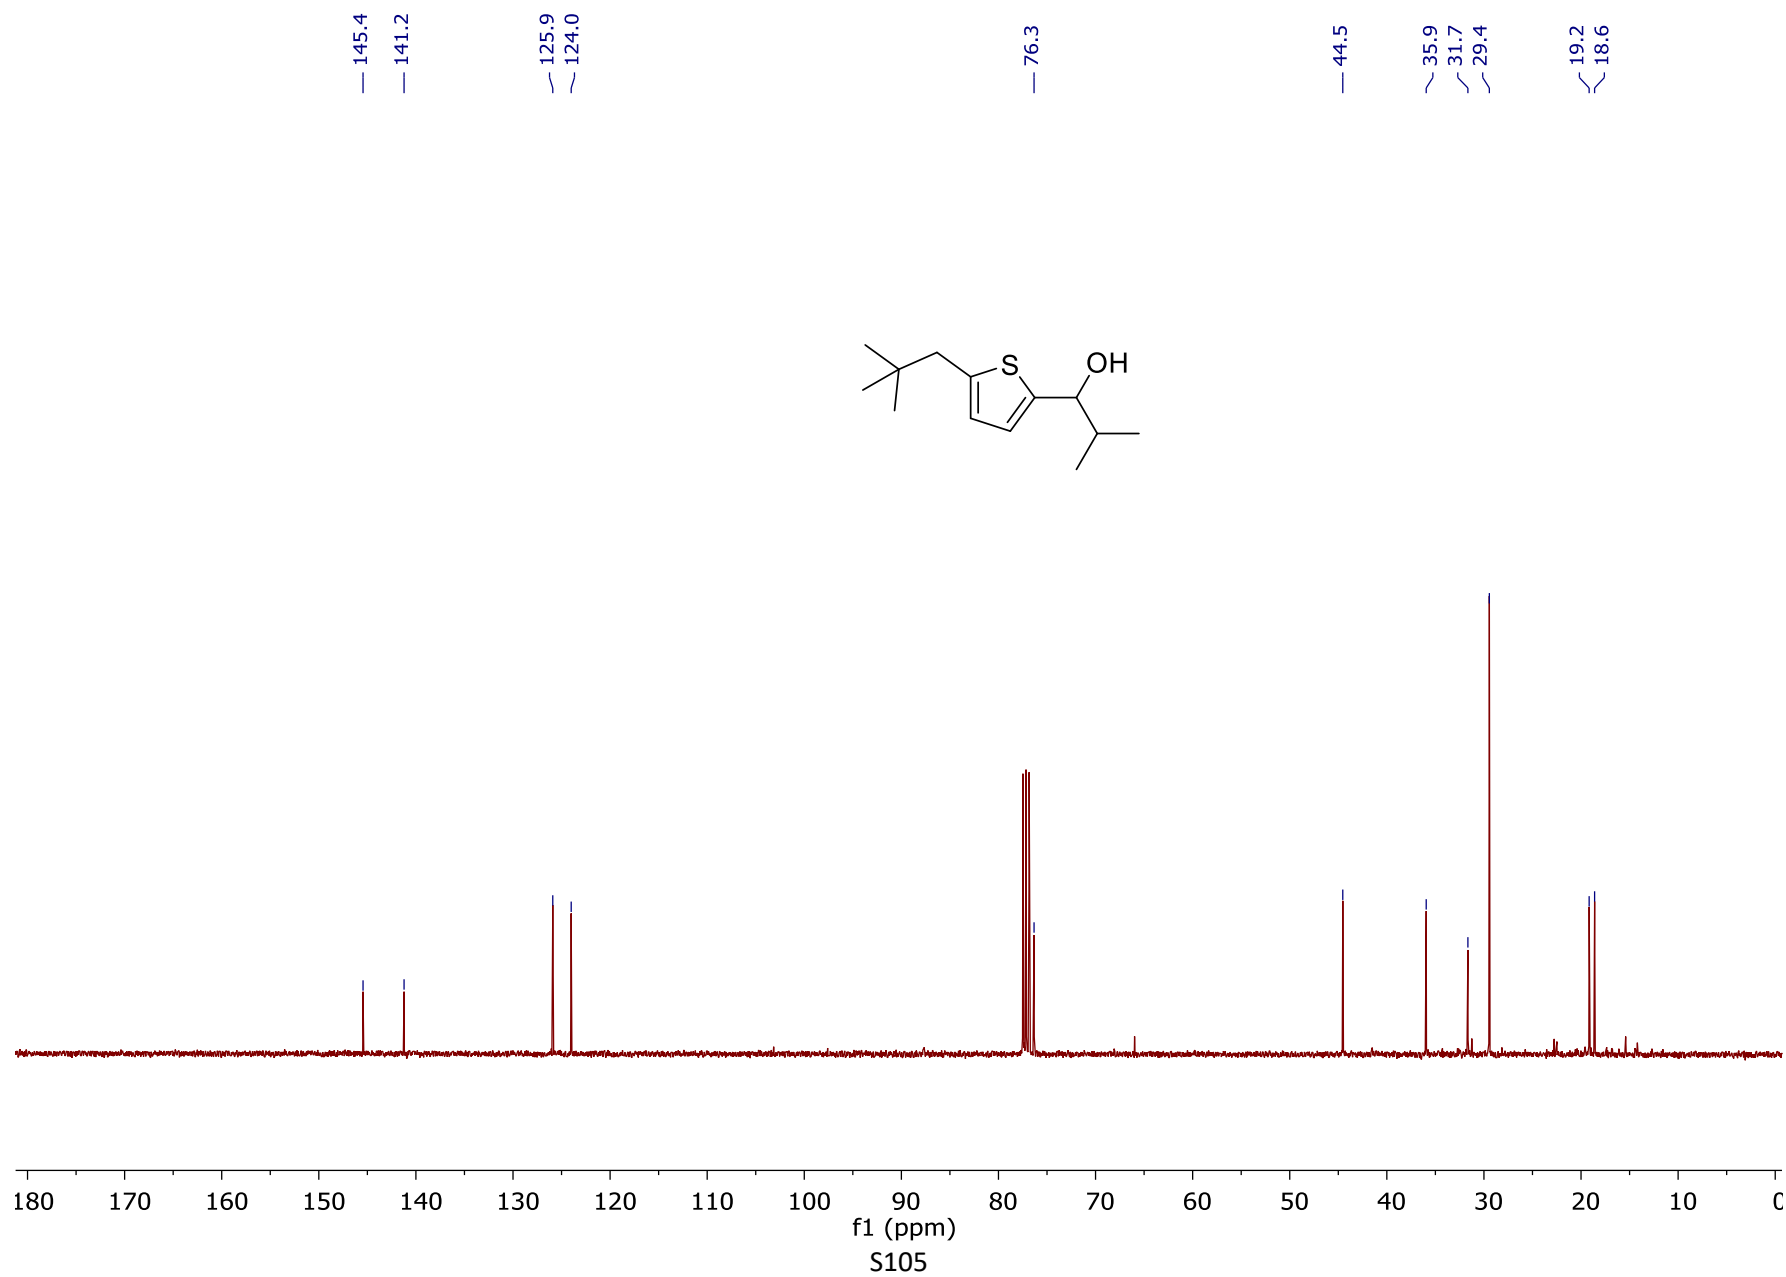

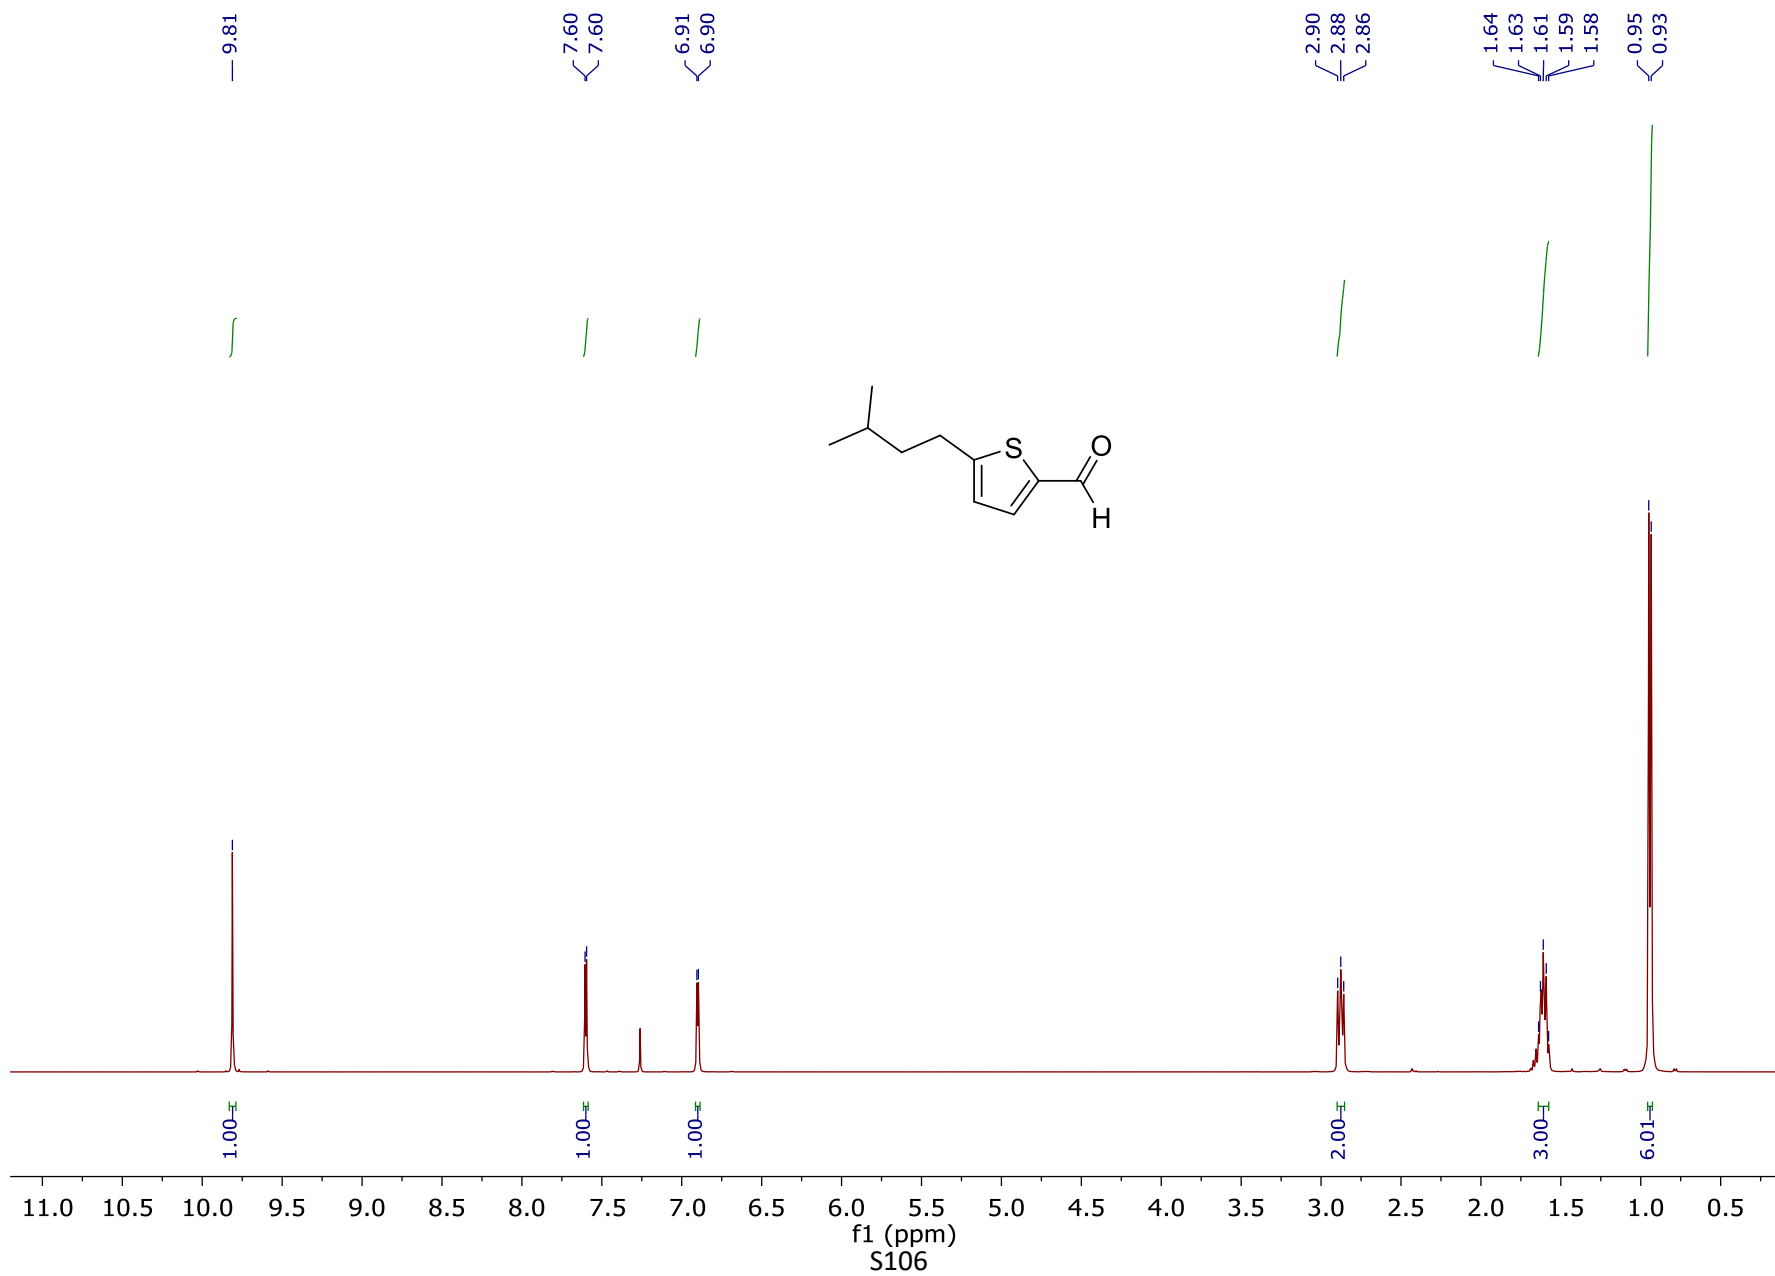

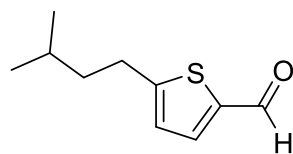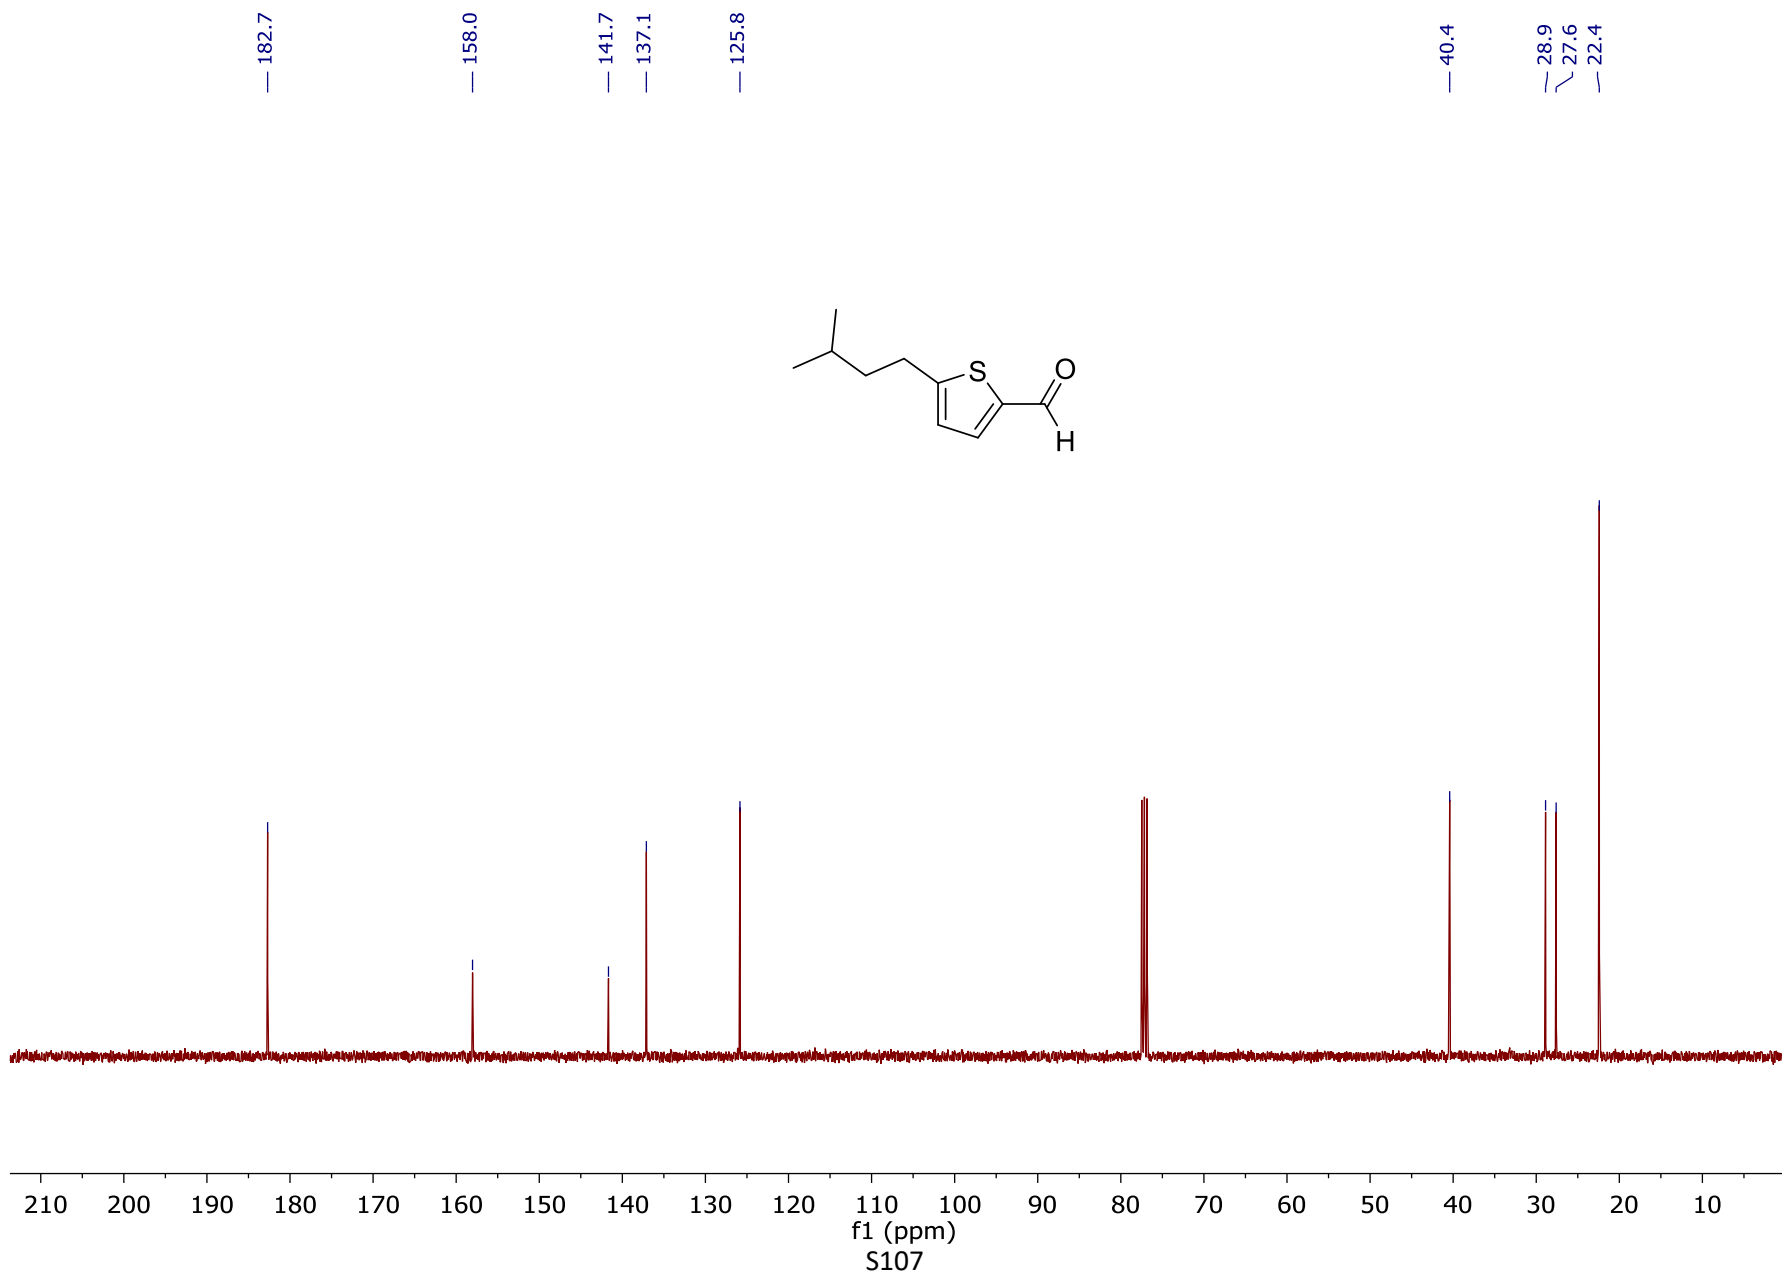

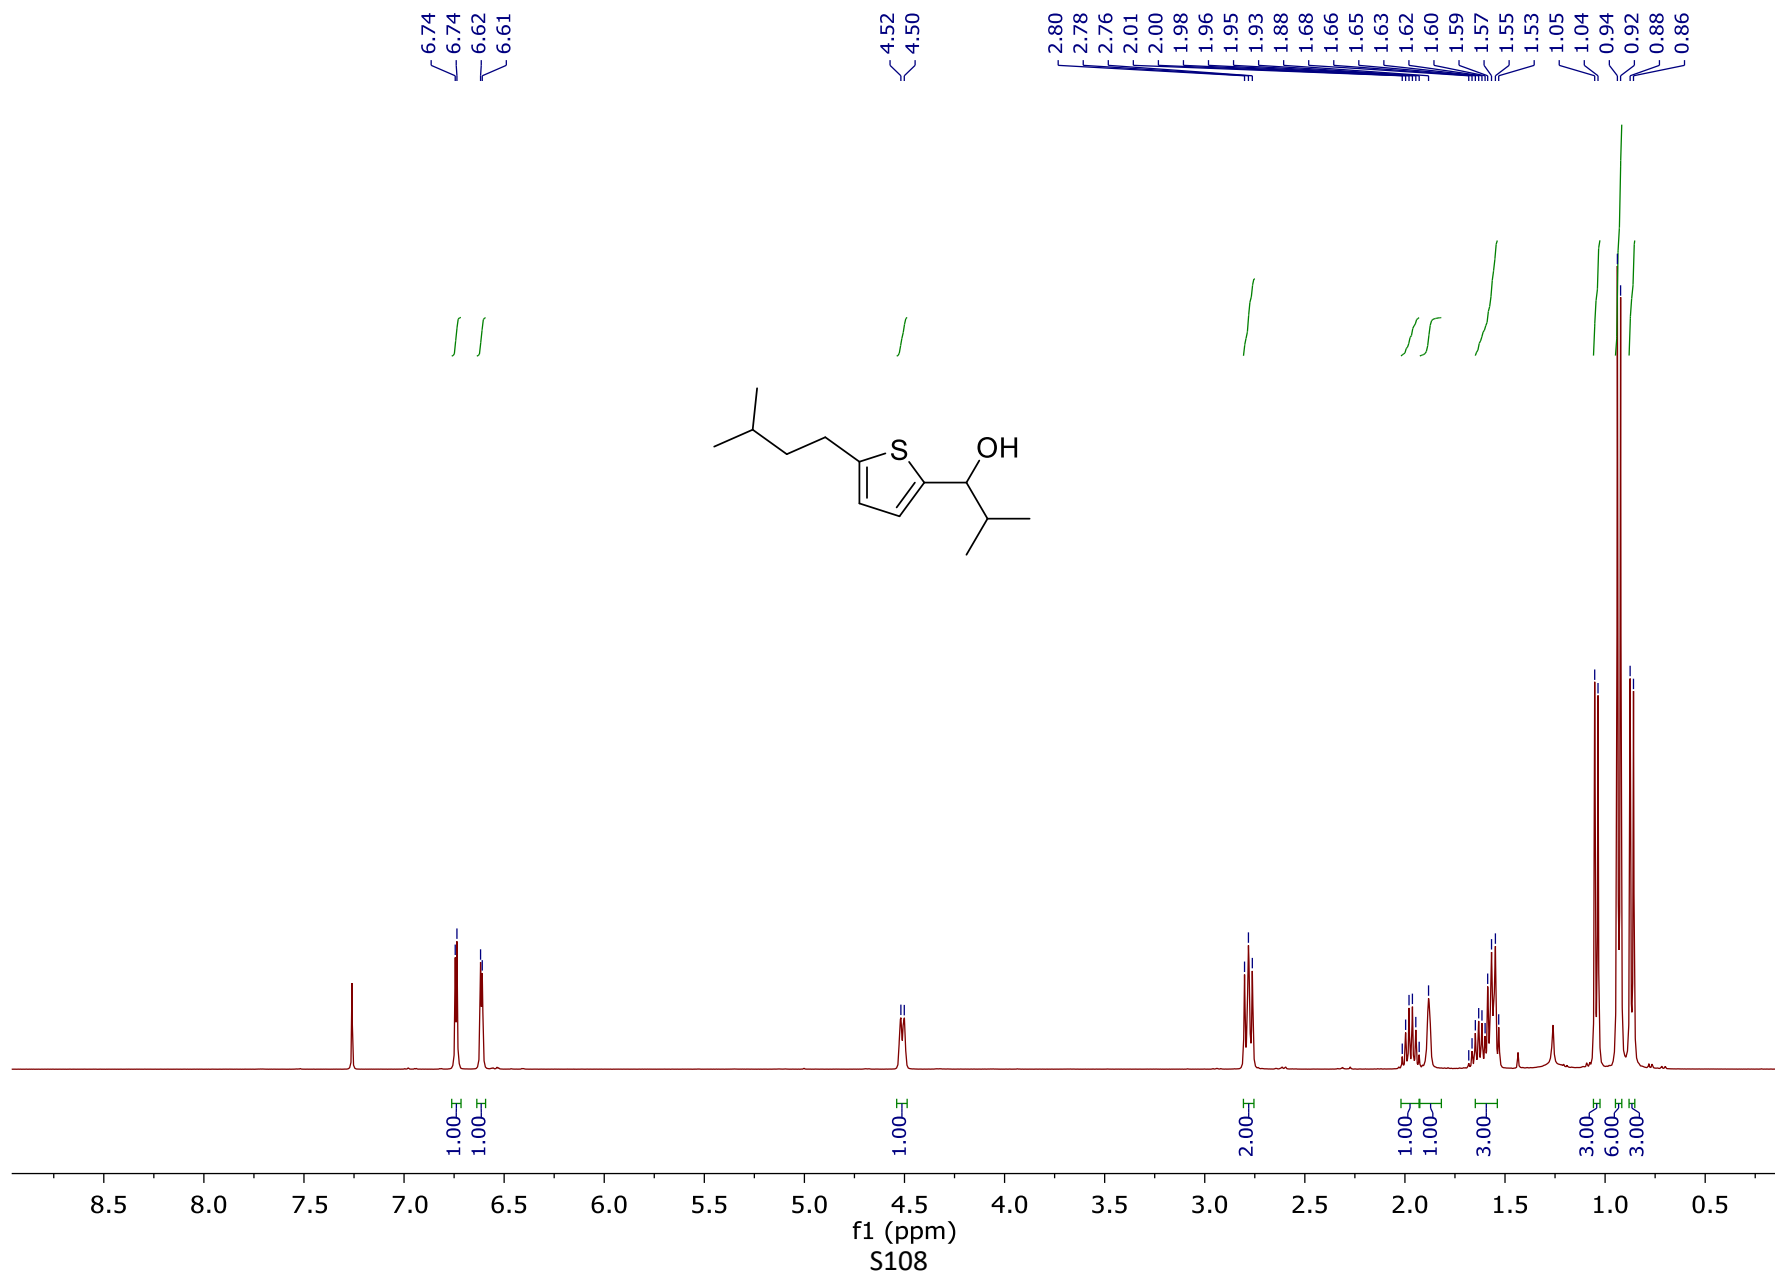

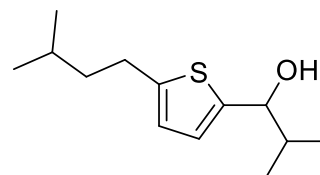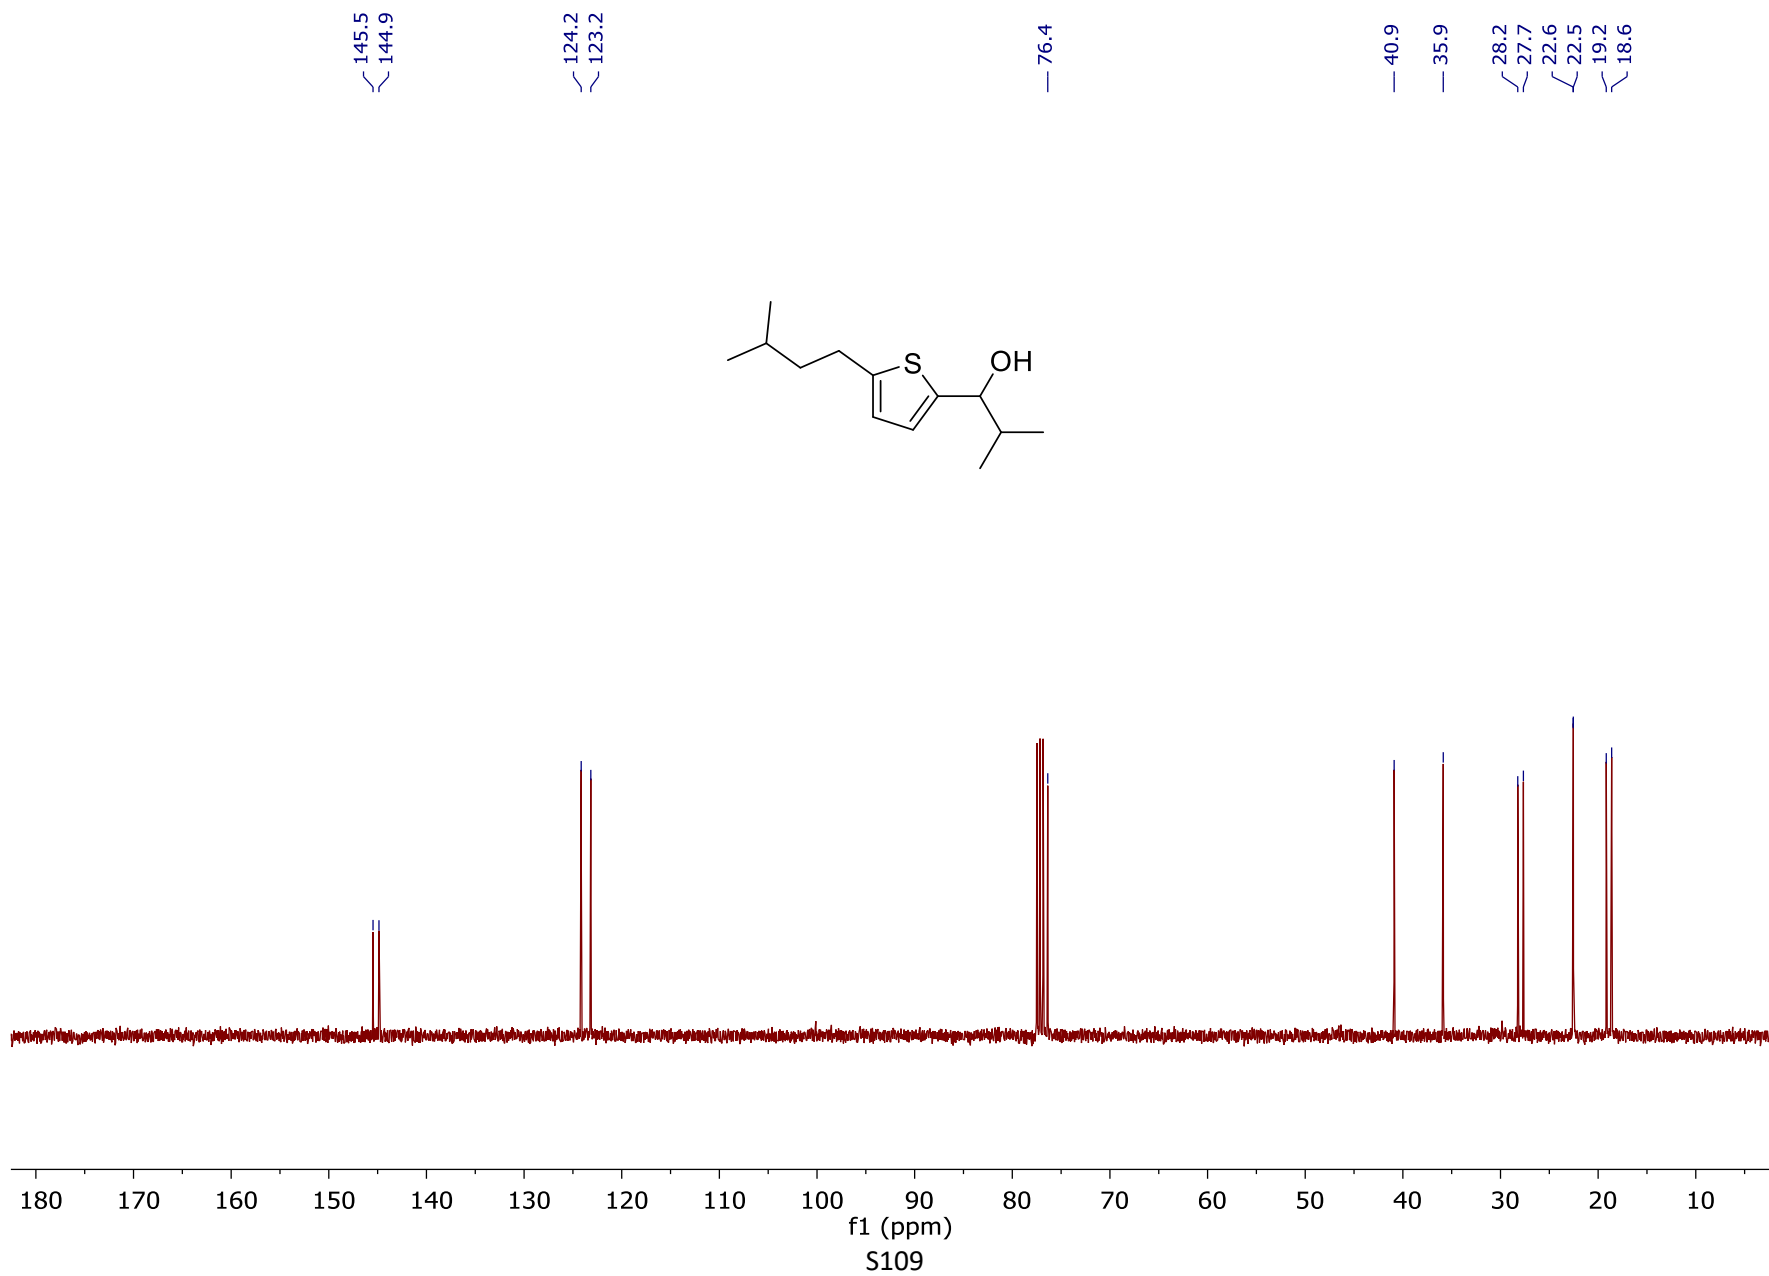

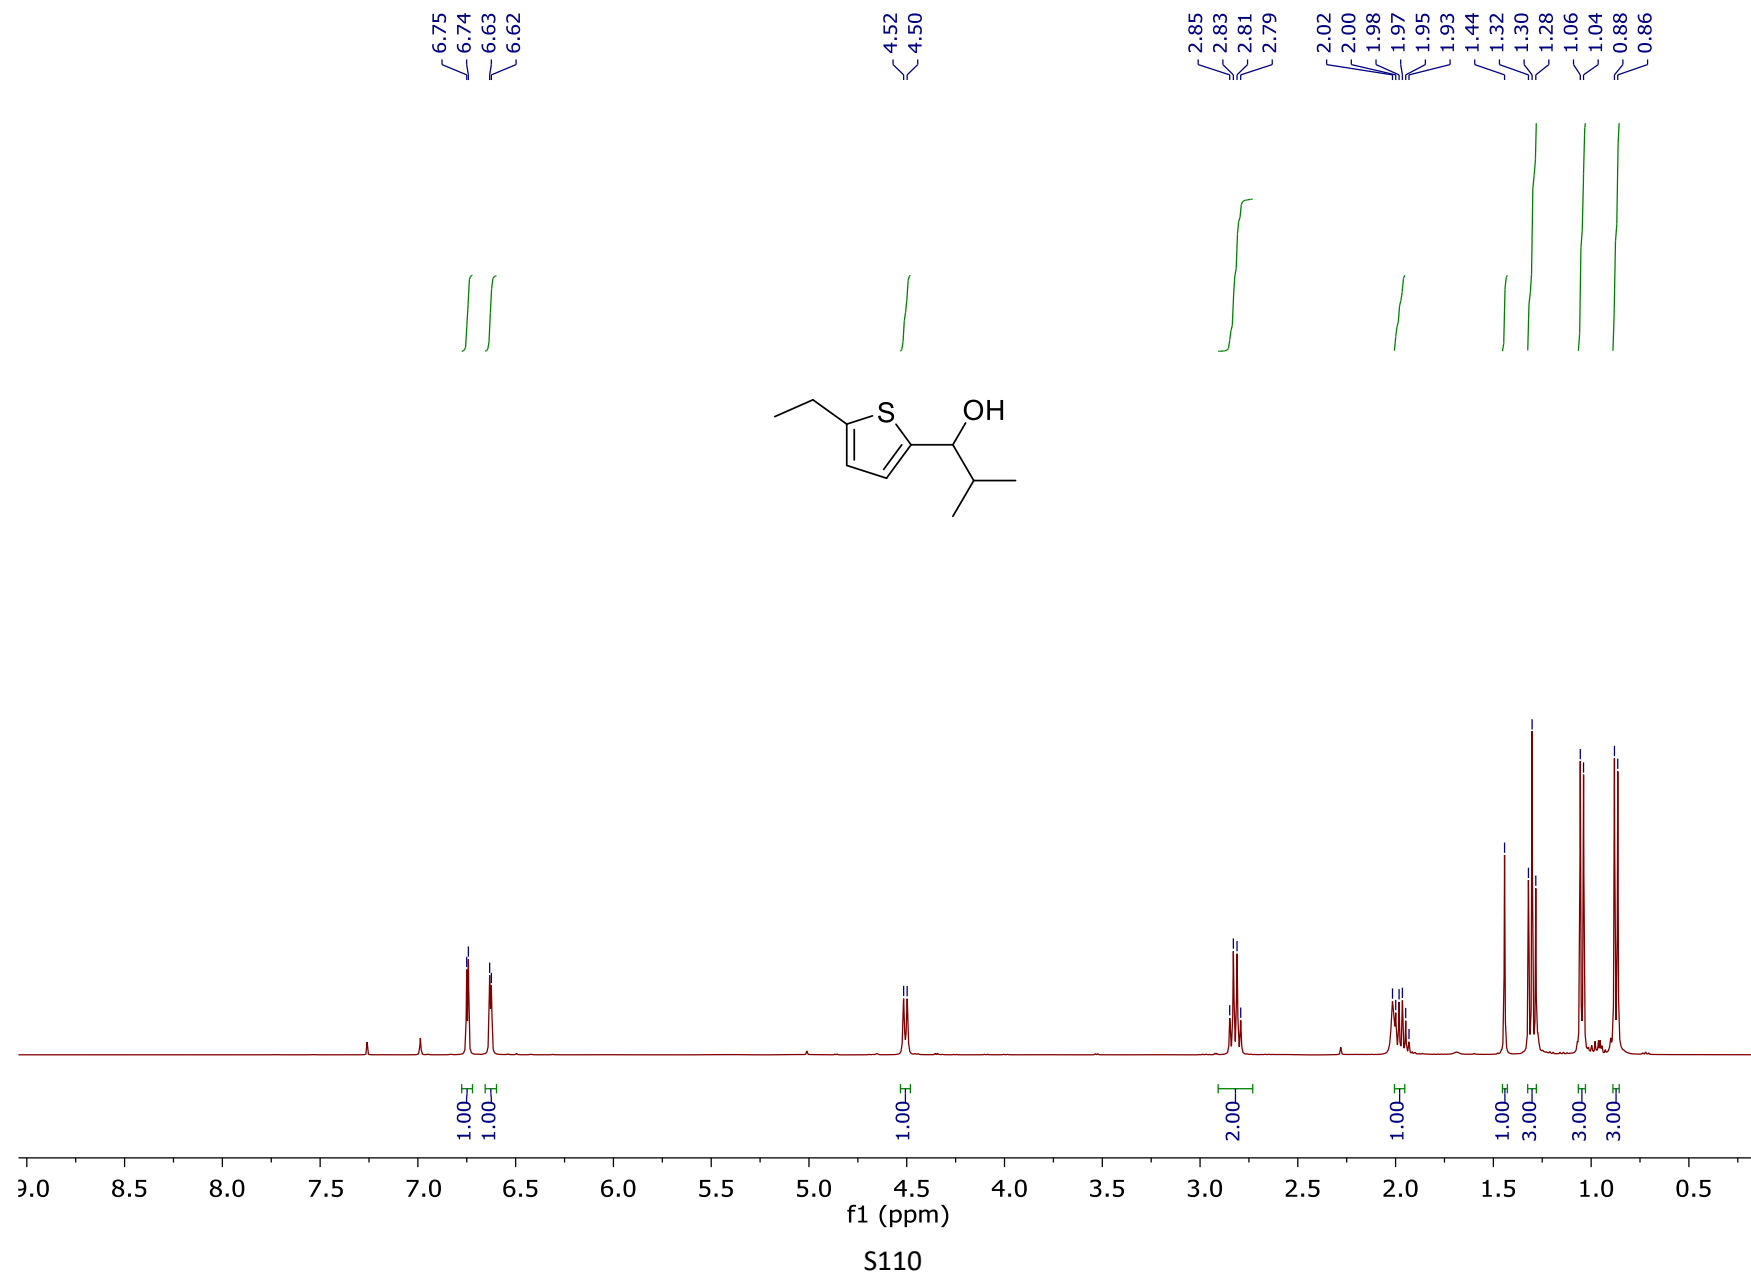

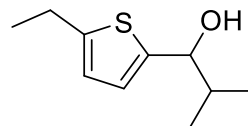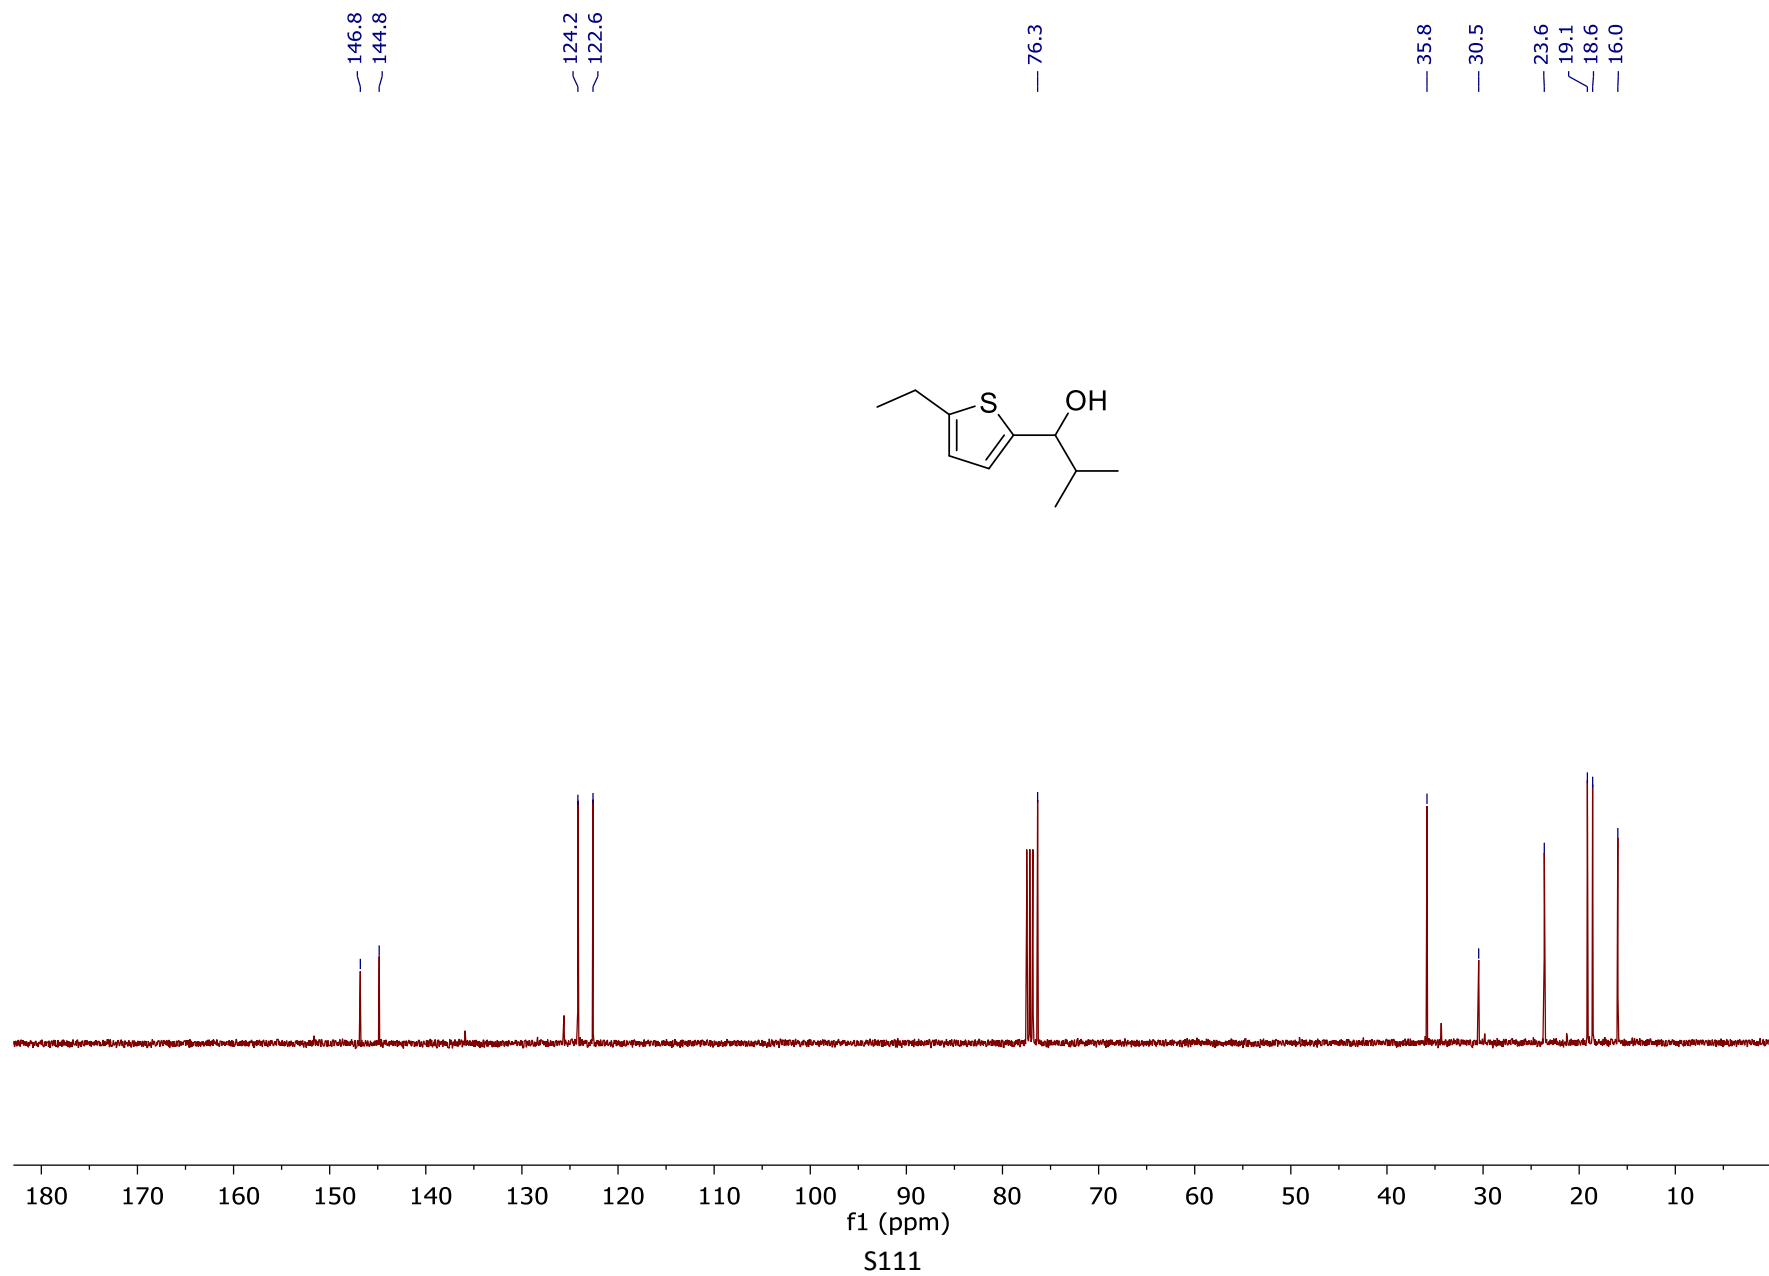

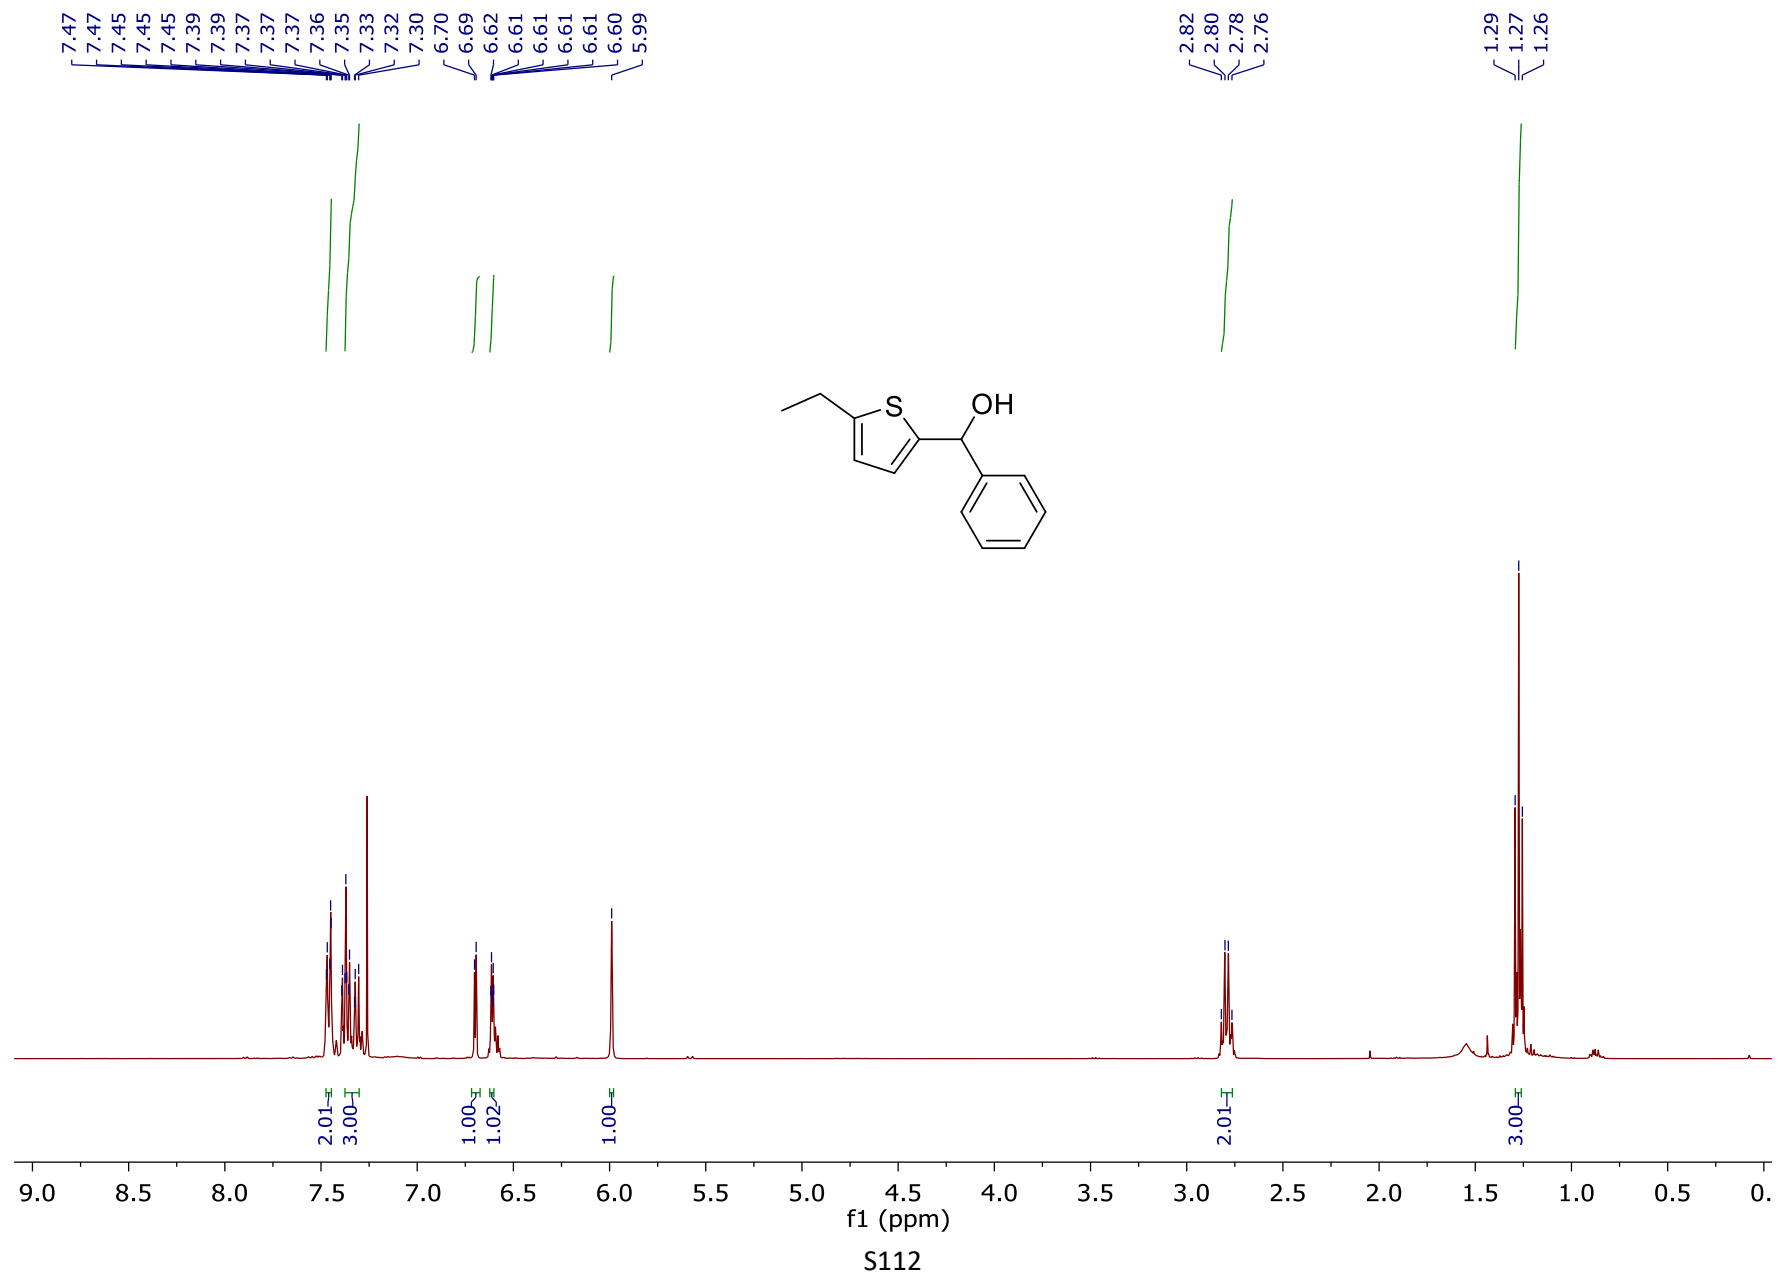



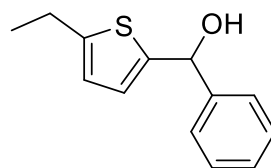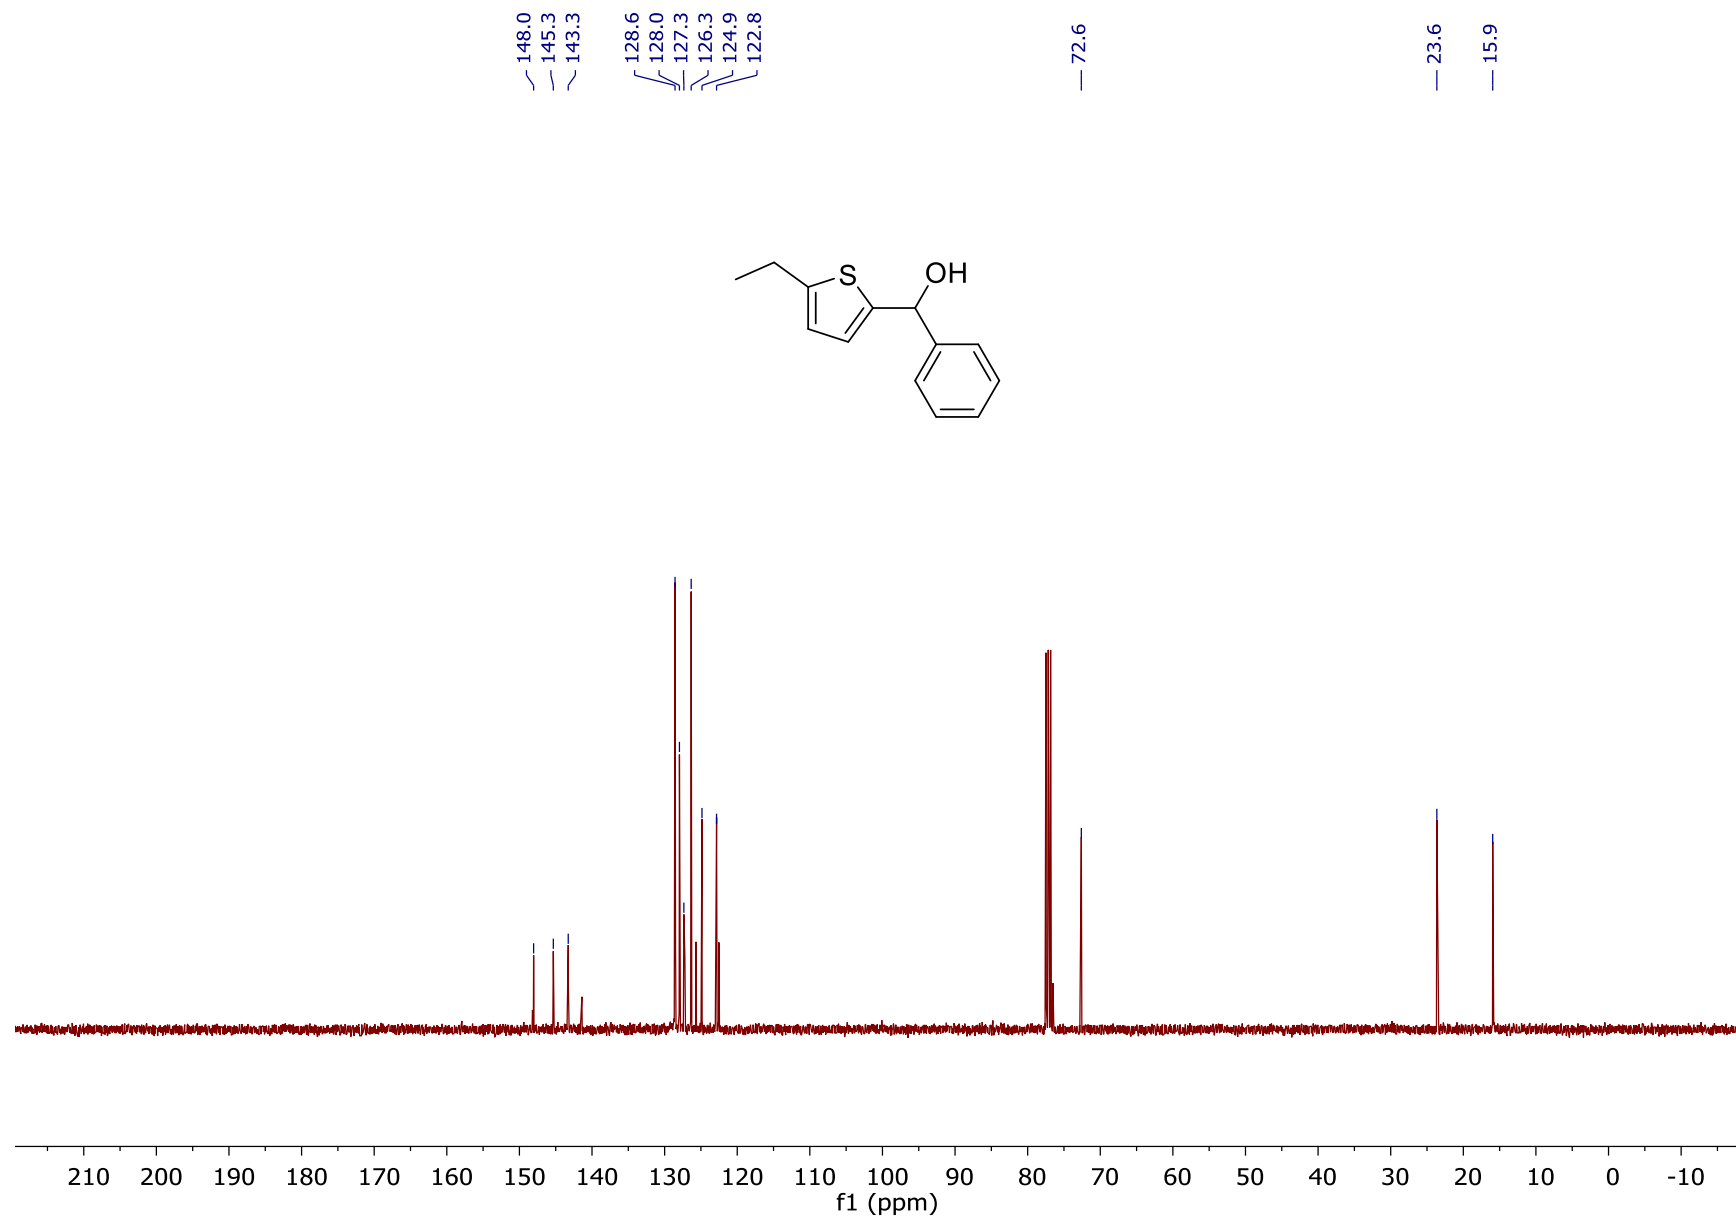

S113

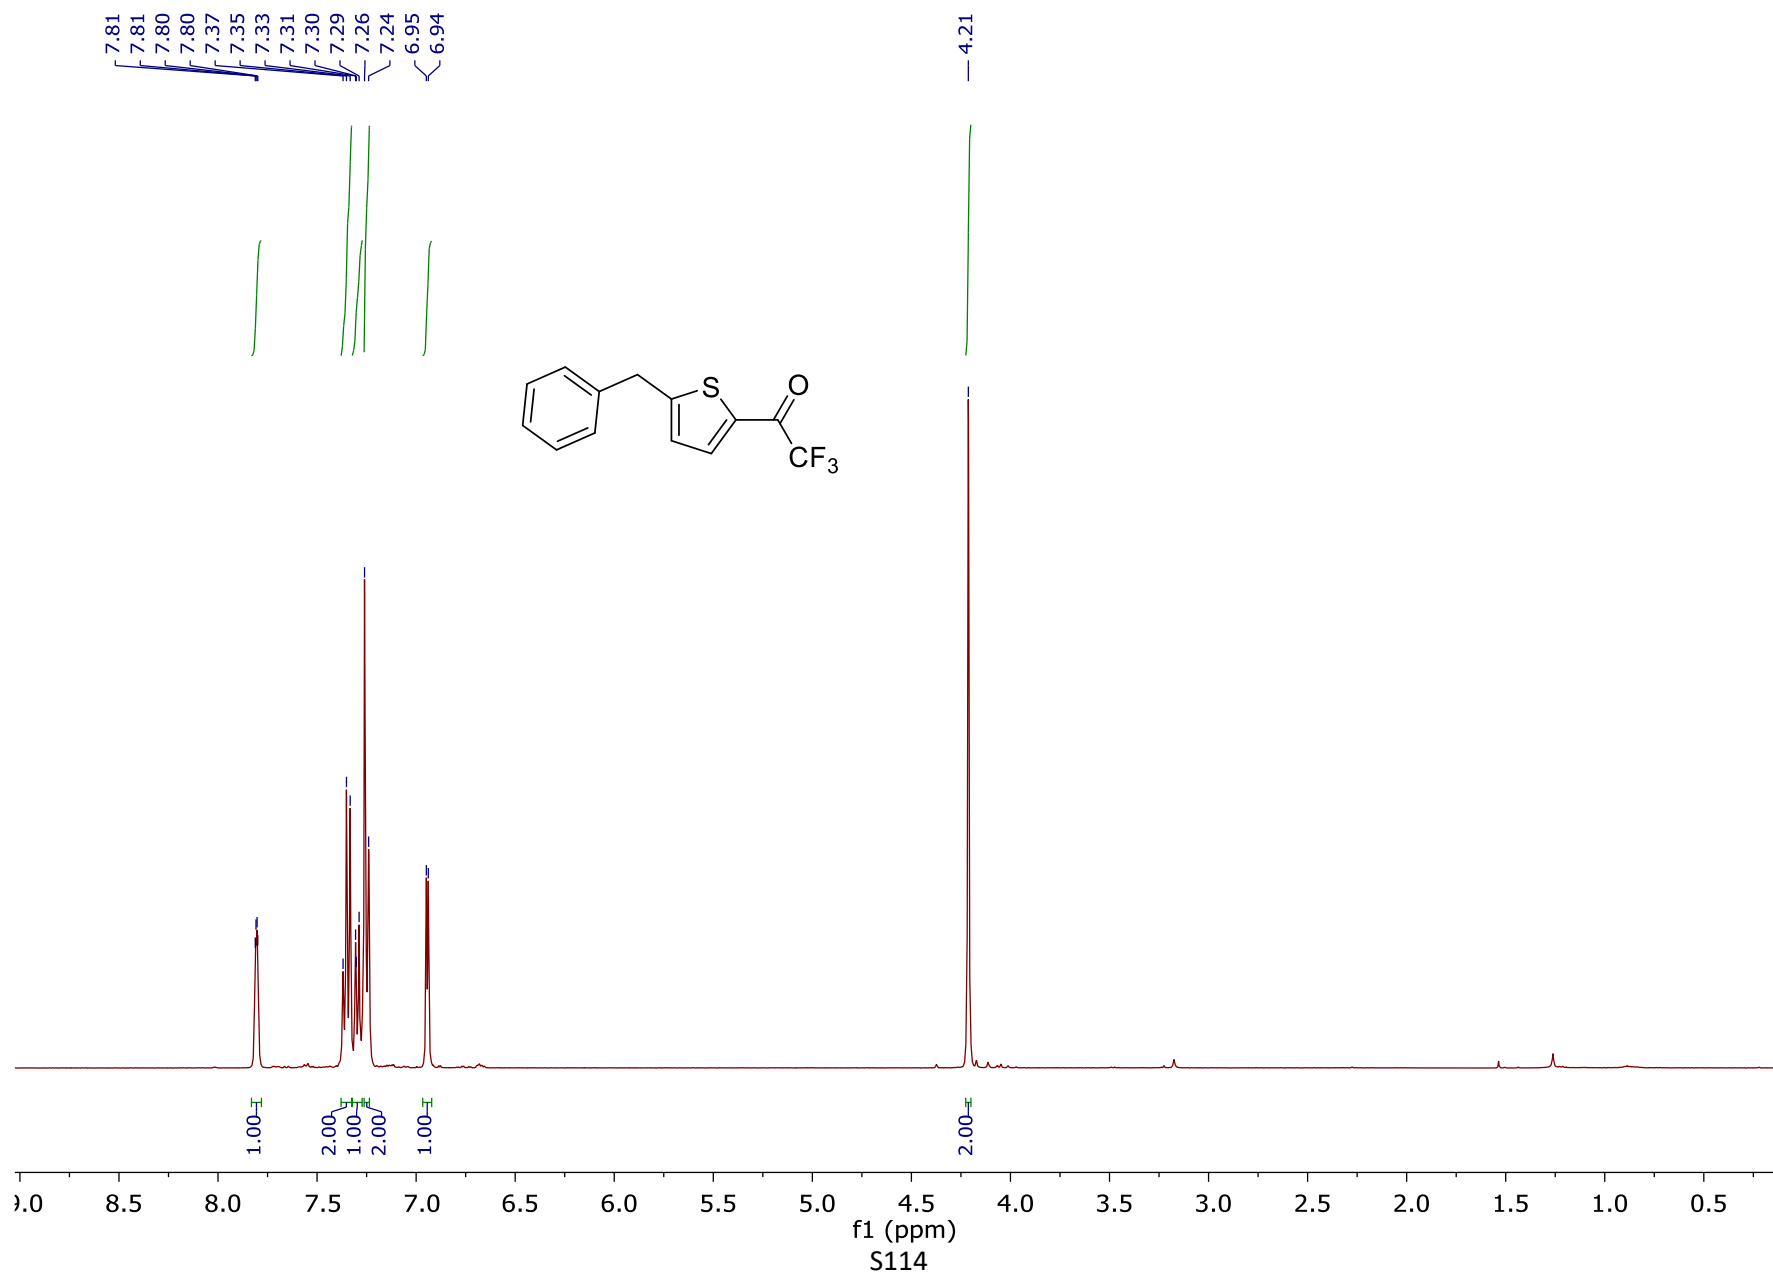

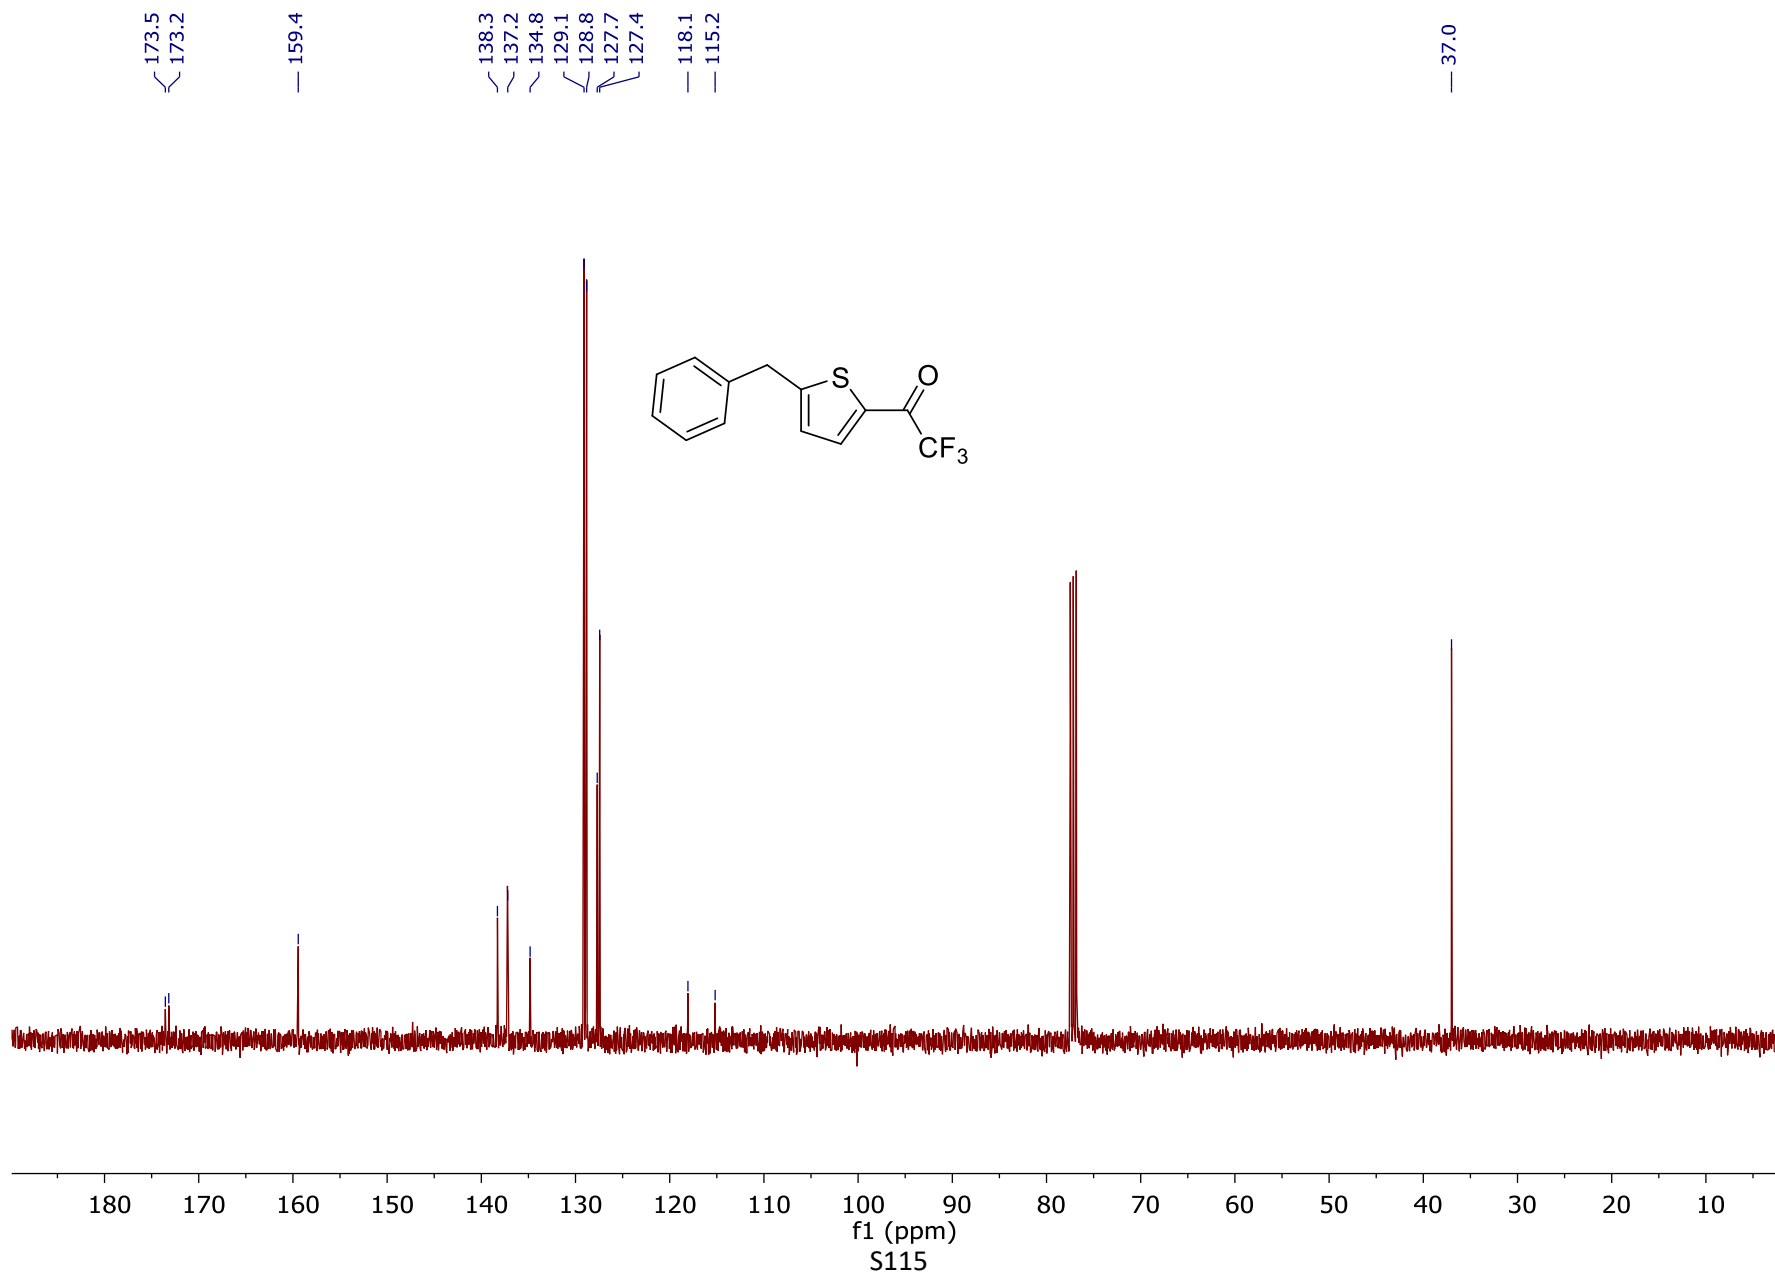

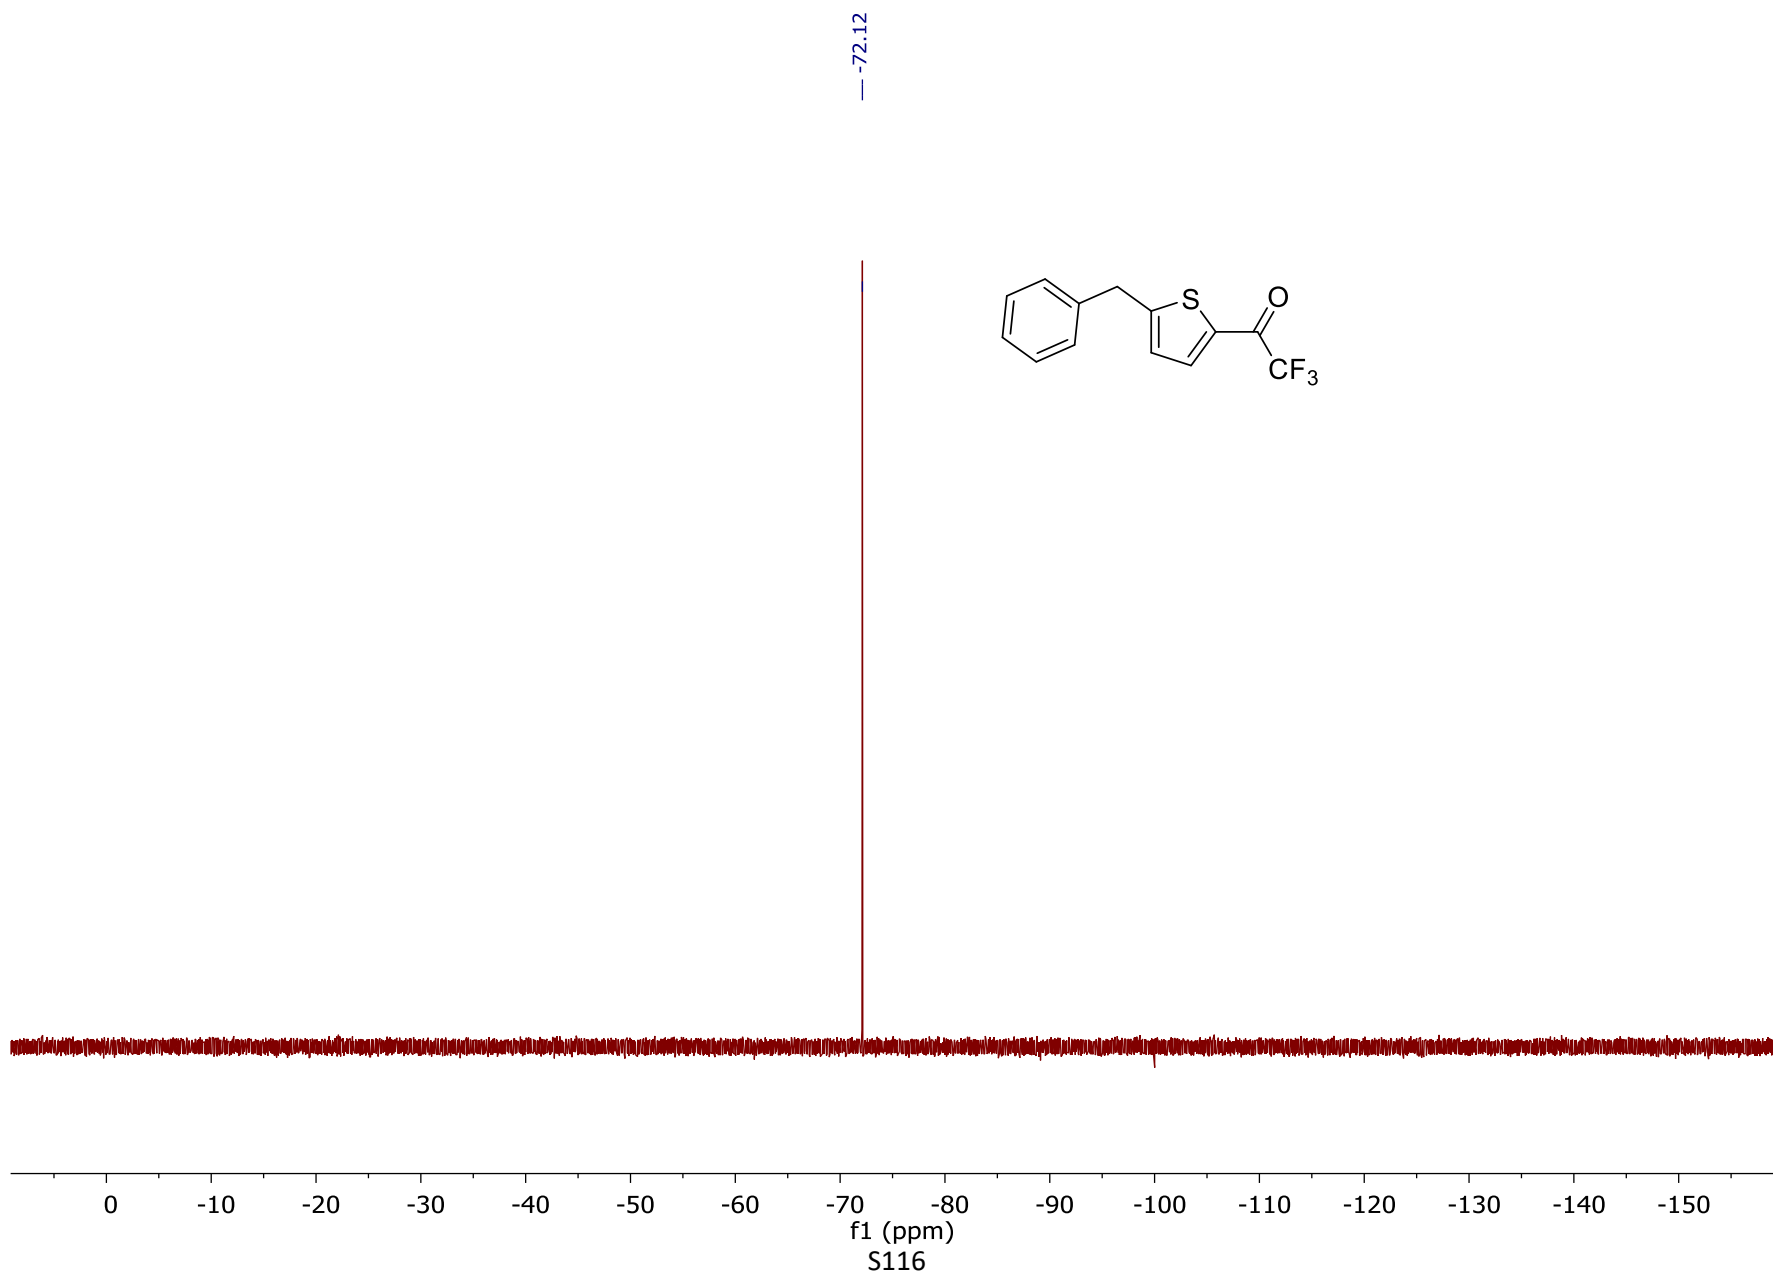

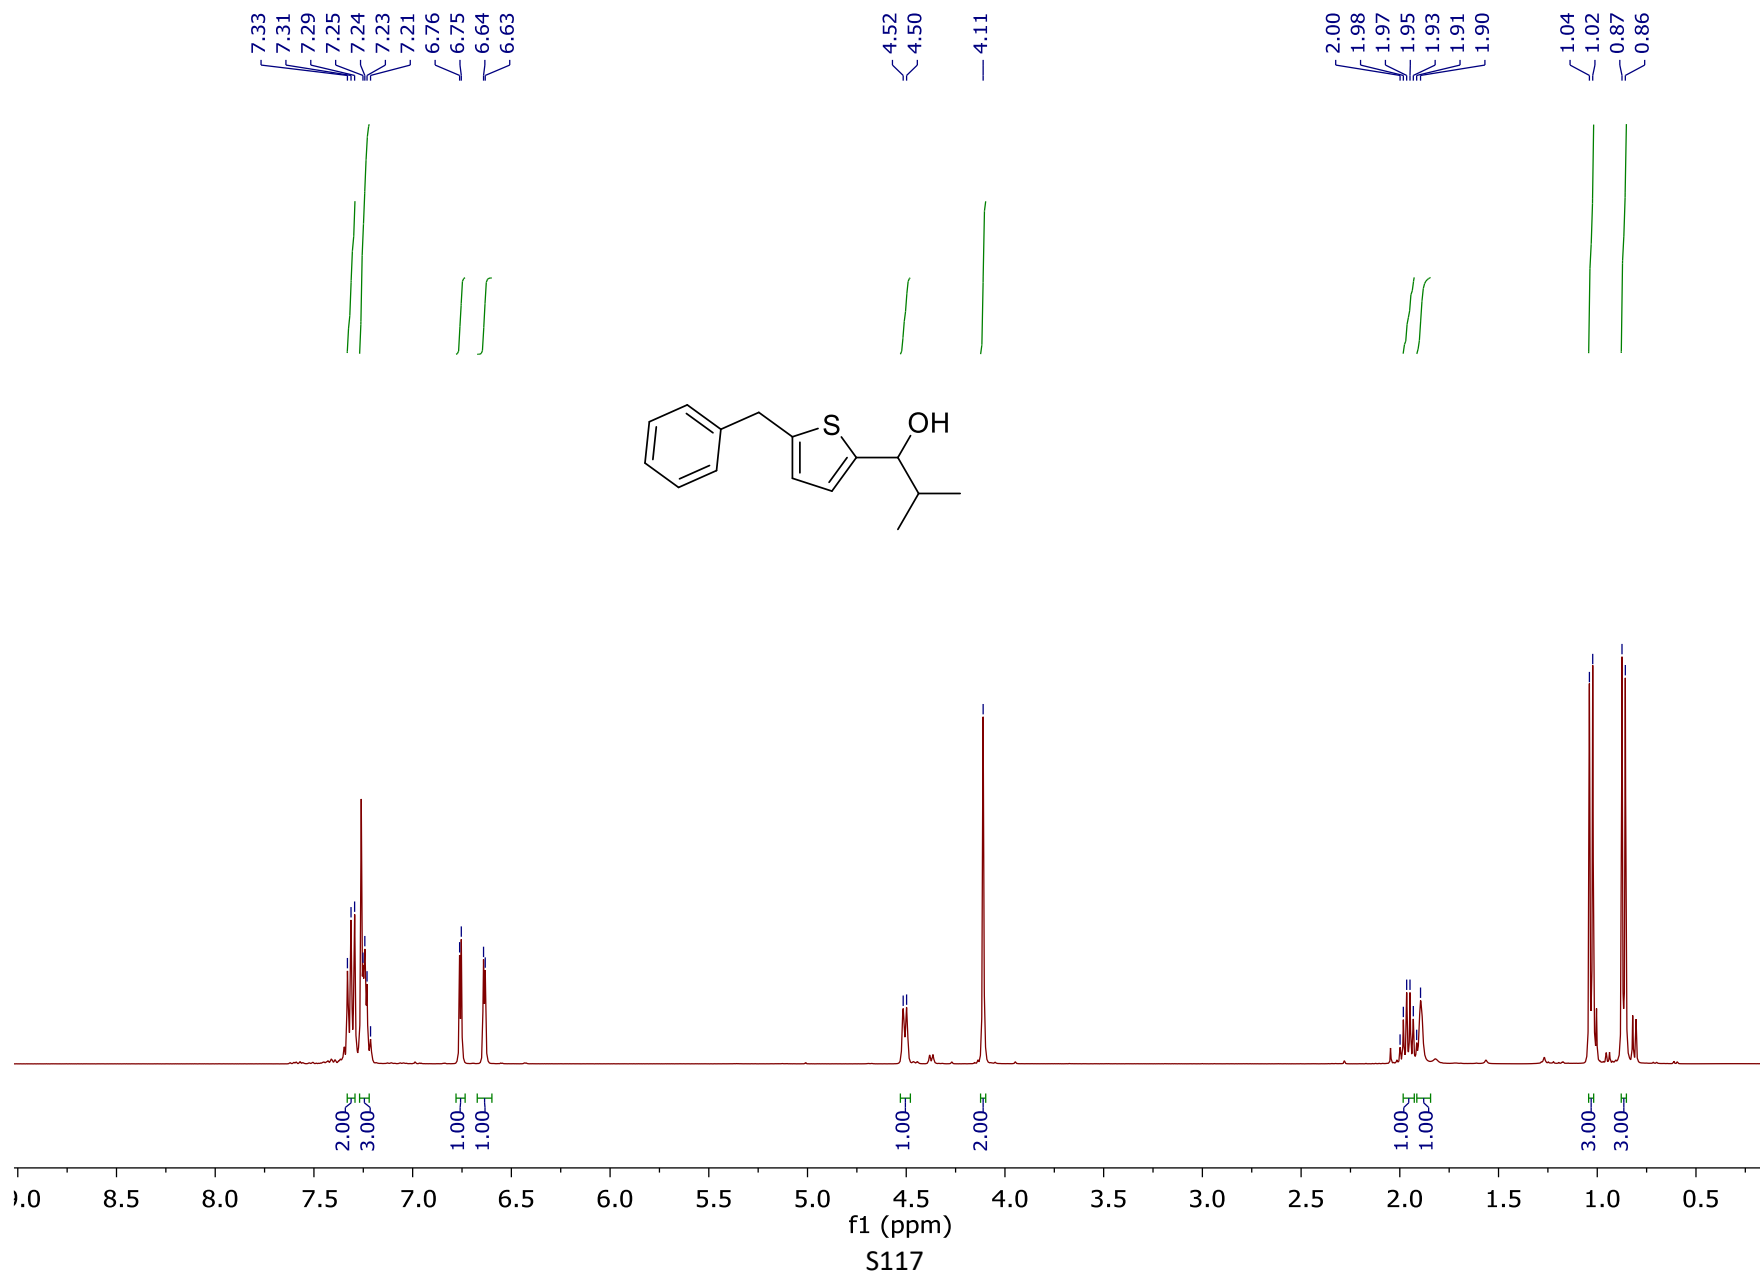

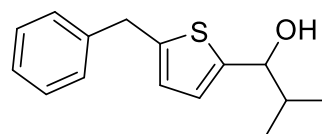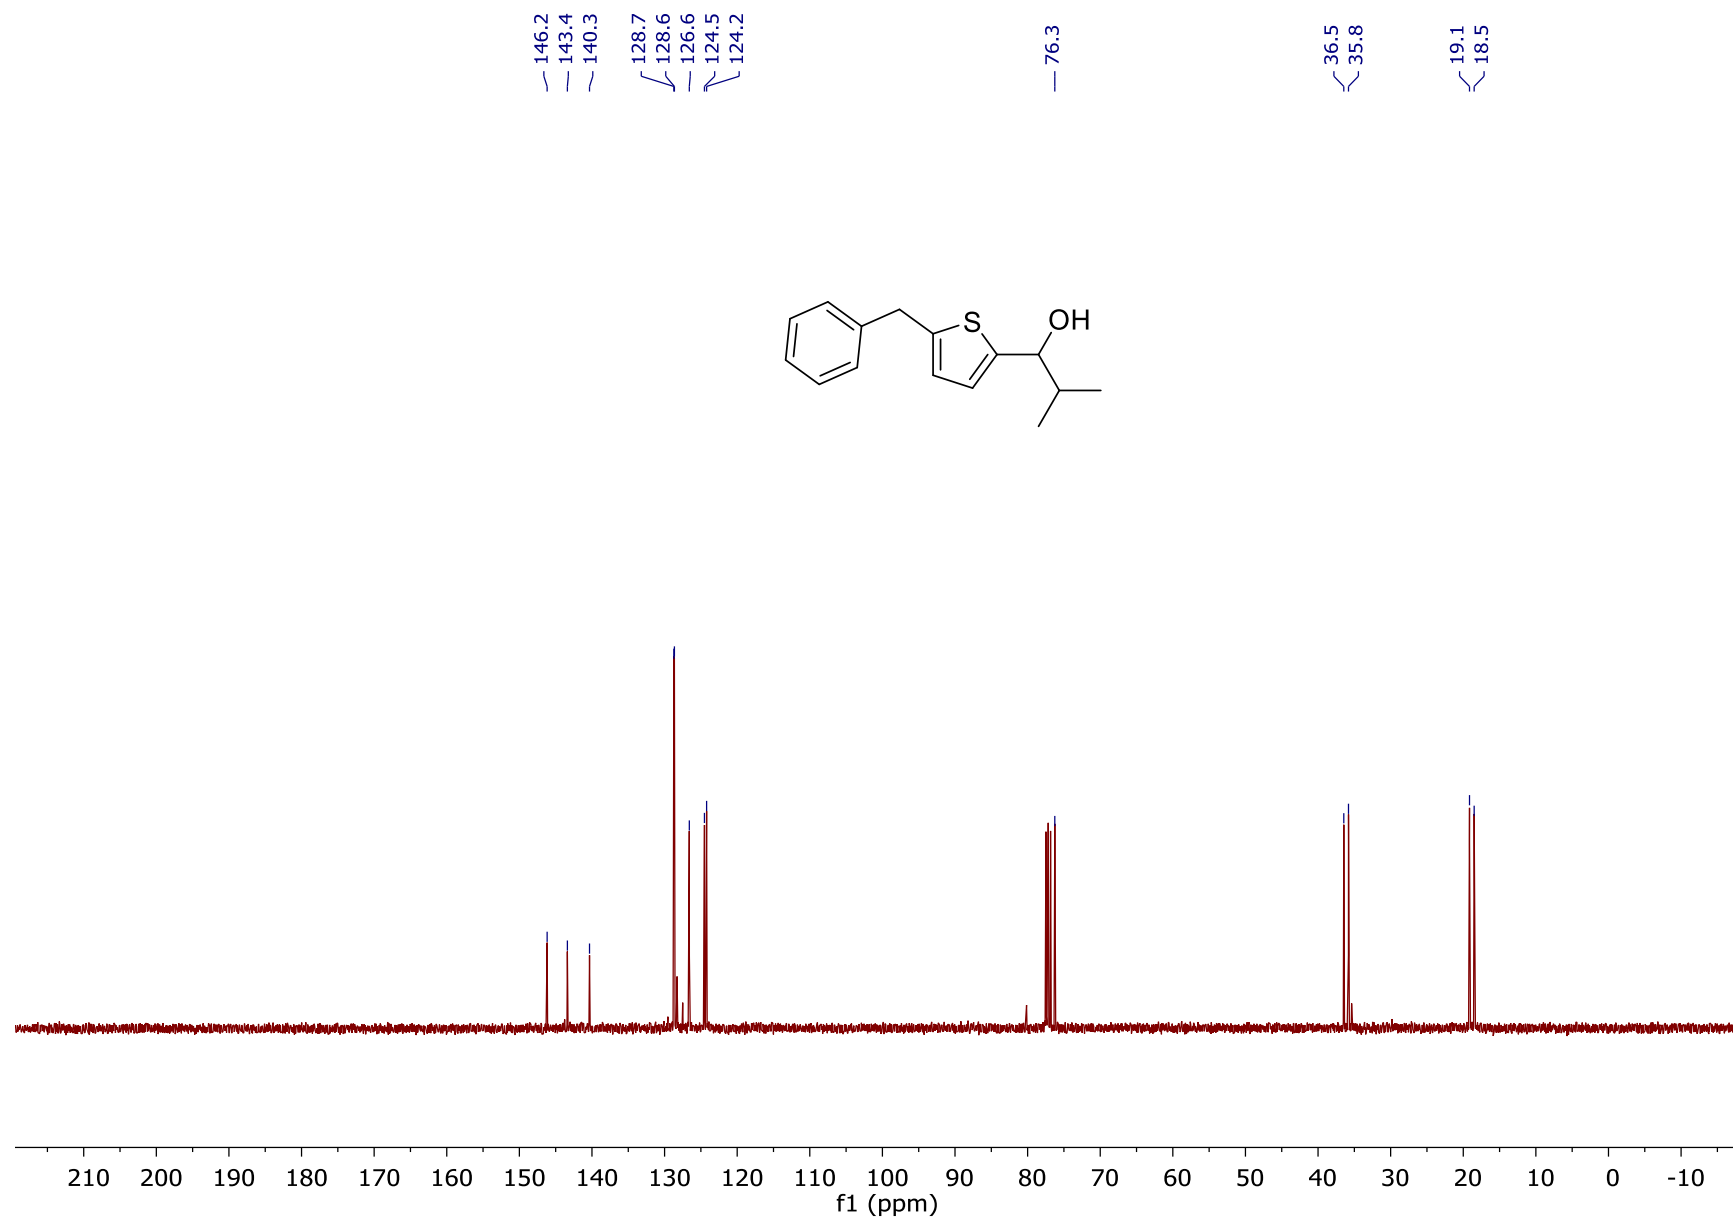

S118
